# Supplementary material for: Inhibition of the lncRNA Coded within Transglutaminase 2 Gene Impacts Several Relevant Networks in MCF-7 Breast Cancer Cells
Source: Noncoding RNA. 2021 Aug 18;7(3):49. doi: 10.3390/ncrna7030049 (PMC8395837; doi:10.3390/ncrna7030049)
Supplement: Supplementary file 1 [file ncrna-07-00049-s001.zip]

Archive with 5 entries (5 files):
- Supplementary Figures S1-S4.pdf
- Supplementary Material S1.pdf
- Supplementary Material S2.xls
- Supplementary Material S3.pdf
- Supplementary Table S1.pdf
