# Supplementary material for: Inhibition of the lncRNA Coded within Transglutaminase 2 Gene Impacts Several Relevant Networks in MCF-7 Breast Cancer Cells
Source: Noncoding RNA. 2021 Aug 18;7(3):49. doi: 10.3390/ncrna7030049 (PMC8395837; doi:10.3390/ncrna7030049)
Supplement: Supplementary file 1 [file ncrna-07-00049-s001.zip › Supplementary Material S2.xls]

## Sheet: DESeq2_all_rm
Gene_ID	baseMean	log2FoldChange	lfcSE	stat	pvalue	padj	MT	WT	MT1	MT2	MT3	WT1	WT2	WT3
A1BG	77.5855	-0.92018	0.303259	-3.0343	0.00241092	0.0134218	53.5709	101.6	31.8313	60.0107	68.8706	81.7472	130.036	93.017
A1BG-AS1	139.797	-0.128469	0.197466	-0.650587	0.515313	0.692243	133.593	146.001	108.227	132.197	160.355	135.877	154.229	147.897
A1CF	2.81865	0.913025	1.26889	0.719547	0.471804	NA	3.71878	1.91851	5.30522	1.73944	4.11168	1.10469	0	4.65085
A2M	15.8212	0.768889	0.488571	1.57375	0.115545	0.254704	19.9813	11.661	18.0378	18.2641	23.6421	9.94223	11.0884	13.9525
A2M-AS1	20.8701	-0.631211	0.453838	-1.39083	0.164277	0.327007	16.3178	25.4224	18.0378	16.5247	14.3909	34.2455	26.2088	15.8129
A2ML1	4.03818	0.5252	0.990172	0.530413	0.595826	NA	4.7619	3.31446	4.24418	6.95776	3.08376	1.10469	6.04819	2.79051
A4GALT	70.1887	-1.21454	0.277732	-4.37307	1.23e-05	0.000169622	42.15	98.2275	36.0755	51.3135	39.0609	79.5378	123.988	91.1567
AAAS	1701.9	-0.0210296	0.1017	-0.206781	0.836181	0.916748	1689.67	1714.14	1563.98	1645.51	1859.51	1629.42	1779.18	1733.84
AACS	2062.73	-0.233904	0.115194	-2.03053	0.042303	0.123233	1895.68	2229.79	1608.54	2013.4	2065.09	2122.11	2337.63	2229.62
AACSP1	43.5041	-0.263303	0.299148	-0.880177	0.378764	0.574381	39.5563	47.4518	35.0145	37.398	46.2564	49.7111	43.3454	49.299
AADAT	398.212	0.0355302	0.126358	0.281186	0.778568	0.88247	403.396	393.028	439.273	373.11	397.805	388.852	380.028	410.205
AAED1	210.162	0.22333	0.150202	1.48686	0.137051	0.287992	226.278	194.047	231.308	229.606	217.919	207.682	187.494	186.964
AAGAB	3177.27	0.303573	0.0977839	3.10453	0.00190584	0.0111038	3510.55	2843.98	3879.18	3301.46	3351.02	2936.27	2706.57	2889.11
AAK1	811.303	0.269446	0.116006	2.3227	0.0201951	0.0705171	886.573	736.032	942.208	933.209	784.302	768.866	749.976	689.256
AAMDC	188.017	0.206136	0.18246	1.12976	0.258578	0.446626	201.537	174.497	227.064	213.081	164.467	152.448	179.43	191.615
AAMP	4319.8	-0.431135	0.120329	-3.58297	0.000339707	0.00273475	3678.96	4960.64	3075.97	3850.25	4110.65	4613.19	5306.28	4962.46
AANAT	16.6035	-0.685415	0.48033	-1.42697	0.153589	0.312432	12.7461	20.4609	11.6715	12.1761	14.3909	16.5704	26.2088	18.6034
AAR2	1034.89	-0.106534	0.122131	-0.872295	0.383047	0.578503	996.483	1073.29	841.409	1081.06	1066.98	1015.21	1121.94	1082.72
AARD	5.73809	1.02987	0.848791	1.21333	0.225002	0.406928	7.69682	3.77936	12.7325	5.21832	5.13959	5.52346	3.0241	2.79051
AARS	8286.8	0.0283082	0.077213	0.366624	0.713899	0.839232	8368.31	8205.3	8215.67	8292.78	8596.49	7865.41	8489.64	8260.84
AARS2	1016.73	-0.240765	0.134755	-1.78669	0.0739869	0.185547	931.85	1101.6	767.135	975.826	1052.59	1082.6	1204.6	1017.61
AASDH	408.016	0.00493267	0.127777	0.0386037	0.969206	0.984815	408.528	407.505	403.197	412.247	410.14	451.819	367.932	402.764
AASDHPPT	1075.49	-0.0163643	0.119602	-0.136823	0.891171	0.945409	1069.26	1081.72	1138.5	1005.4	1063.9	1242.78	995.936	1006.44
AASS	65.2384	-0.0237718	0.261616	-0.0908655	0.927599	0.963931	64.6821	65.7947	63.6627	57.4015	72.9822	70.7003	74.5944	52.0895
AATBC	20.5359	-0.619252	0.444102	-1.39439	0.163199	0.325538	16.1596	24.9122	18.0378	19.1338	11.3071	22.0938	31.249	21.3939
AATF	1558.11	0.205962	0.101704	2.02511	0.0428557	0.124376	1669.49	1446.73	1853.65	1564.63	1590.19	1436.1	1422.33	1481.76
AATK	85.879	-1.25212	0.394353	-3.17512	0.00149776	0.00919204	50.6622	121.096	23.343	66.9684	61.6751	78.4331	195.558	89.2963
AATK-AS1	10.3344	-1.2239	0.686354	-1.7832	0.0745543	0.186548	6.19623	14.4726	5.30522	6.08804	7.19543	8.83754	26.2088	8.37153
ABALON	21.6397	-0.102629	0.449012	-0.228565	0.819207	0.906201	20.8221	22.4572	12.7325	26.0916	23.6421	17.6751	29.2329	20.4637
ABAT	6010.86	-0.207348	0.0982597	-2.11021	0.0348405	0.10647	5579.24	6442.48	4916.88	6036.73	5784.1	6427.1	6404.03	6496.31
ABCA10	26.2182	-0.0677452	0.424272	-0.159674	0.873138	0.935729	25.521	26.9154	28.6482	30.4402	17.4746	28.722	35.2811	16.7431
ABCA11P	182.734	0.00954653	0.171677	0.0556074	0.955655	0.978282	183.448	182.019	185.683	187.859	176.802	152.448	206.647	186.964
ABCA12	5794.42	-0.0675532	0.0985481	-0.685484	0.493038	0.673004	5658.12	5930.73	5281.88	6295.9	5396.57	6259.19	5790.14	5742.87
ABCA17P	62.7868	-0.533147	0.255687	-2.08515	0.0370554	0.11172	51.3228	74.2508	48.8081	54.7924	50.368	62.9674	81.6506	78.1343
ABCA2	3370.43	-1.18387	0.364152	-3.25102	0.00114992	0.00739349	2060.12	4680.73	1187.31	2608.29	2384.77	4107.25	5934.28	4000.66
ABCA3	2613.03	-0.790623	0.174112	-4.54088	5.6e-06	8.8e-05	1914.09	3311.97	1336.92	2250.83	2154.52	3012.5	3819.43	3103.98
ABCA4	52.9742	-0.0610567	0.283158	-0.215628	0.829278	0.91242	51.7903	54.1581	45.6249	63.4895	46.2564	47.5018	55.4418	59.5309
ABCA5	1581.29	0.583921	0.0951515	6.13675	8.42e-10	3.3e-08	1896.72	1265.86	1951.26	1874.25	1864.64	1373.13	1209.64	1214.8
ABCA7	306.049	-0.880859	0.179845	-4.89788	9.69e-07	1.94e-05	215.163	396.935	181.439	246.131	217.919	356.816	488.895	345.093
ABCA9	5.66637	-0.716515	0.871015	-0.82262	0.410724	0.603328	4.30963	7.02311	6.36627	3.47888	3.08376	3.31408	13.1044	4.65085
ABCB10	639.4	0.199077	0.121067	1.64436	0.100103	0.229463	683.252	595.548	685.435	676.642	687.678	671.653	526.193	588.798
ABCB4	29.6359	-0.011632	0.401768	-0.028952	0.976903	0.987914	29.5162	29.7555	27.5872	32.1796	28.7817	33.1408	16.1285	39.9973
ABCB6	1707.88	-0.15818	0.103742	-1.52474	0.127324	0.273371	1614.53	1801.23	1499.26	1590.72	1753.63	1660.35	1907.2	1836.16
ABCB7	727.408	0.218324	0.111176	1.96377	0.0495562	0.138523	782.43	672.387	862.629	761.005	723.655	686.014	663.285	667.862
ABCB8	640.652	-0.67326	0.164694	-4.08795	4.35e-05	0.000493055	493.58	787.724	395.77	545.314	539.657	714.736	953.598	694.837
ABCB9	367.605	-0.777844	0.174486	-4.45792	8.28e-06	0.000122387	270.733	464.478	215.392	290.486	306.32	395.48	552.401	445.551
ABCC1	2111.05	-0.196536	0.126972	-1.54787	0.121653	0.264192	1967.31	2254.78	1636.13	2017.75	2248.06	2182.87	2449.52	2131.95
ABCC10	565.056	-0.570499	0.209006	-2.72958	0.00634157	0.0287884	454.56	675.553	290.726	520.962	551.992	606.476	804.409	615.773
ABCC11	72.6262	0.168965	0.257761	0.655511	0.512139	0.689291	76.7392	68.5131	57.2964	94.7995	78.1218	67.3862	66.5301	71.6231
ABCC2	433.224	-0.0771399	0.121497	-0.634911	0.525487	0.70031	421.614	444.834	442.456	434.86	387.525	449.61	425.389	459.504
ABCC3	694.475	-0.304984	0.136336	-2.237	0.0252864	0.0832915	621.165	767.785	503.996	652.29	707.208	750.086	793.321	759.949
ABCC4	240.534	-0.132868	0.146618	-0.906215	0.364822	0.561078	229.497	251.572	216.453	219.169	252.868	251.87	260.072	242.774
ABCC5	2429.03	0.00708413	0.0984561	0.0719522	0.94264	0.97227	2434.9	2423.16	2226.07	2578.72	2499.9	2259.1	2535.2	2475.18
ABCC5-AS1	2.87705	-0.239409	1.16008	-0.206373	0.8365	NA	2.62709	3.12702	4.24418	2.60916	1.02792	4.41877	4.03213	0.93017
ABCC6	84.1875	-0.17404	0.24808	-0.701546	0.482963	0.665199	79.1277	89.2474	68.9679	80.0142	88.401	72.9097	113.908	80.9248
ABCC6P1	12.0929	0.710374	0.637938	1.11355	0.265474	0.454591	15.0058	9.18009	8.48836	25.2219	11.3071	5.52346	8.06426	13.9525
ABCC6P2	21.477	-0.259805	0.426024	-0.609836	0.54197	0.713948	19.5928	23.3611	21.2209	13.9155	23.6421	26.5126	22.1767	21.3939
ABCC8	137.226	-0.273824	0.218163	-1.25513	0.20943	0.387202	124.088	150.363	96.5551	151.331	124.378	125.935	175.398	149.757
ABCC9	1310.49	0.101407	0.112999	0.897418	0.369496	0.565577	1356.53	1264.45	1463.18	1369.81	1236.59	1333.36	1127.99	1332
ABCD1	1995.97	1.16482	0.323026	3.60597	0.000310987	0.0025351	2760.61	1231.33	1743.3	3198.83	3339.71	1077.07	1485.84	1131.09
ABCD3	895.726	-0.0972177	0.108078	-0.899513	0.368379	0.564146	865.615	925.837	951.757	856.674	788.414	945.616	908.237	923.659
ABCD4	949.341	-0.169571	0.119174	-1.42289	0.154769	0.314131	893.401	1005.28	765.013	920.164	995.025	1035.1	980.815	999.933
ABCE1	4488.81	0.144778	0.089209	1.62291	0.104609	0.236562	4713.74	4263.88	4991.15	4591.25	4558.82	4563.48	4092.61	4135.54
ABCF1	3454.98	0.135429	0.0821231	1.6491	0.0991271	0.227863	3617.45	3292.51	3755.04	3489.32	3608	3161.63	3348.68	3367.22
ABCF2	2788.29	-0.0106515	0.110713	-0.096208	0.923355	0.961724	2777.91	2798.68	2396.9	2833.55	3103.29	2702.08	2907.16	2786.79
ABCF3	1766.98	-0.222508	0.10291	-2.16216	0.0306058	0.0965512	1631.05	1902.91	1510.93	1659.43	1722.79	1740.99	2042.27	1925.45
ABCG1	1487.12	-0.329038	0.128889	-2.55289	0.0106835	0.0434192	1318.07	1656.16	1088.63	1357.63	1507.96	1625	1776.15	1567.34
ABCG2	710.629	-0.165134	0.111402	-1.48232	0.138254	0.289548	670.027	751.231	721.51	686.209	602.36	739.039	750.984	763.67
ABCG4	4.60835	-0.818703	1.07471	-0.761791	0.446185	NA	3.37614	5.84056	5.30522	1.73944	3.08376	0	10.0803	7.44136
ABHD1	43.3978	0.0890828	0.303835	0.293195	0.769373	0.876478	44.7442	42.0515	37.1366	42.6163	54.4797	40.8736	44.3534	40.9275
ABHD10	837.941	0.135099	0.11828	1.1422	0.253372	0.4407	877.129	798.753	979.344	886.245	765.8	822.996	775.177	798.086
ABHD11	1932.26	-0.380134	0.110184	-3.45	0.000560587	0.00413147	1679	2185.51	1466.36	1725.52	1845.11	2102.23	2320.49	2133.81
ABHD11-AS1	8.68405	-1.79375	0.764851	-2.34522	0.0190157	0.0673227	3.83945	13.5287	4.24418	5.21832	2.05584	19.8845	15.1205	5.58102
ABHD12	1602.51	-0.122666	0.115667	-1.06051	0.288912	0.481035	1534.21	1670.81	1363.44	1592.46	1646.73	1609.54	1858.81	1544.08
ABHD12B	2.0206	-1.08636	1.34446	-0.808029	0.419074	NA	1.27613	2.76506	1.06104	1.73944	1.02792	4.41877	2.01606	1.86034
ABHD13	409.351	0.077696	0.120913	0.642577	0.520498	0.696556	420.49	398.212	450.944	409.638	400.888	391.061	408.253	395.322
ABHD14A	50.0589	-0.17422	0.310437	-0.561208	0.574656	0.739326	46.8633	53.2544	38.1976	64.3593	38.033	51.9205	59.4739	48.3688
ABHD14B	1074.59	-0.253163	0.105001	-2.41105	0.0159067	0.0590501	980.426	1168.75	891.278	975.826	1074.18	1196.38	1159.24	1150.62
ABHD15	384.736	-0.00396263	0.123004	-0.0322155	0.9743	0.98689	384.247	385.226	400.014	393.983	358.744	371.177	390.108	394.392
ABHD16A	1136.76	0.040976	0.129186	0.317186	0.751103	0.865014	1152.95	1120.57	984.65	1147.16	1327.04	1030.68	1216.69	1114.34
ABHD16B	75.7455	-0.854256	0.2975	-2.87145	0.00408599	0.0202099	53.773	97.7179	36.0755	68.7079	56.5355	85.0613	129.028	79.0644
ABHD17A	130.68	-1.35927	0.322503	-4.21476	2.5e-05	0.000309232	73.1337	188.226	35.0145	93.9297	90.4569	139.191	258.056	167.431
ABHD17B	333.649	-0.0450823	0.124695	-0.361539	0.717696	0.842071	328.522	338.775	338.473	319.187	327.906	338.036	339.707	338.582
ABHD17C	1456.61	0.323645	0.109465	2.95661	0.00311045	0.0163763	1619.59	1293.62	1837.73	1486.35	1534.68	1317.9	1257.02	1305.96
ABHD2	2202.53	-0.348668	0.0878875	-3.96721	7.27e-05	0.000754463	1937.4	2467.67	1818.63	1994.27	1999.3	2459.04	2542.26	2401.7
ABHD3	277.83	-0.0110588	0.143792	-0.0769081	0.938697	0.970589	276.835	278.825	267.383	283.529	279.594	272.859	252.008	311.607
ABHD4	464.903	0.139441	0.122515	1.13815	0.255056	0.442464	487.14	442.667	440.334	500.959	520.127	454.028	452.606	421.367
ABHD5	711.256	0.200671	0.124634	1.61008	0.10738	0.241159	760.597	661.914	821.249	763.614	696.929	716.945	578.61	690.186
ABHD6	117.52	0.382665	0.215375	1.77674	0.0756115	0.188313	132.985	102.055	115.654	120.891	162.411	115.993	89.7148	100.458
ABHD8	57.8314	-1.20237	0.331923	-3.62245	0.000291824	0.00240414	35.0136	80.6493	26.5261	37.398	41.1168	56.3393	114.916	70.6929
ABI1	1644.87	0.171201	0.094031	1.82068	0.0686548	0.17587	1742.42	1547.32	1858.95	1668.12	1700.18	1623.9	1488.86	1529.2
ABI2	3479.86	0.145816	0.0784279	1.85923	0.0629946	0.165378	3655.46	3304.26	3687.13	3636.3	3642.94	3422.34	3199.49	3290.94
ABI3BP	2.34679	-0.421698	1.26907	-0.332289	0.739671	NA	2.02519	2.6684	2.12209	0.86972	3.08376	1.10469	5.04016	1.86034
ABL1	1709.16	-0.24411	0.136861	-1.78363	0.0744842	0.186433	1564.66	1853.67	1258.4	1733.35	1702.23	1702.33	2051.34	1807.32
ABL2	1614.71	0.400882	0.10182	3.93718	8.24e-05	0.00083419	1837.24	1392.18	1689.18	2013.4	1809.14	1373.13	1455.6	1347.82
ABLIM1	1097.5	-0.291622	0.0977266	-2.98406	0.00284455	0.0152558	986.55	1208.45	925.231	1055.84	978.579	1229.52	1200.57	1195.27
ABLIM2	82.8321	-0.146256	0.277102	-0.527804	0.597635	0.756379	78.6065	87.0577	59.4185	86.972	89.4289	65.1768	116.932	79.0644
ABLIM3	433.621	-0.154779	0.114749	-1.34885	0.177387	0.344842	410.37	456.872	397.892	414.856	418.363	452.924	452.606	465.085
ABR	2722.33	-0.406165	0.137347	-2.95722	0.00310428	0.016366	2341.33	3103.34	1864.26	2607.42	2552.32	2876.62	3448.48	2984.92
ABRACL	964.064	0.288399	0.119875	2.40583	0.0161356	0.0596445	1060.52	867.608	1207.47	997.569	976.523	807.53	867.915	927.379
ABT1	651.001	-0.201367	0.106339	-1.89363	0.0582746	0.156403	605.694	696.307	582.514	604.455	630.114	666.129	729.815	692.977
ABTB1	167.097	-0.957056	0.19966	-4.79344	1.64e-06	3.07e-05	113.515	220.679	85.9446	114.803	139.797	223.148	238.904	199.987
ABTB2	913.03	-0.17783	0.118484	-1.50087	0.133389	0.282022	856.748	969.313	760.769	885.375	924.099	901.429	1061.46	945.053
ACAA1	1464.48	0.0107034	0.110764	0.0966324	0.923018	0.961724	1470.06	1458.9	1350.71	1455.91	1603.55	1327.84	1586.64	1462.23
ACAA2	2621.56	0.1893	0.112959	1.67582	0.0937737	0.219322	2793.62	2449.51	3239.37	2577.85	2563.63	2485.56	2348.71	2514.25
ACACA	3210.57	-0.0862905	0.0861846	-1.00123	0.316717	0.511792	3114.34	3306.81	2925.3	3297.98	3119.73	3225.7	3327.51	3367.22
ACACB	2843.03	-0.0997603	0.106229	-0.939104	0.347678	0.544971	2744.47	2941.6	2400.08	2956.18	2877.14	2831.33	3111.79	2881.67
ACAD10	1062.04	-0.241179	0.112875	-2.13668	0.032624	0.101332	973.205	1150.87	883.85	1042.79	992.97	1093.65	1265.08	1093.88
ACAD11	57.188	-0.549367	0.297102	-1.84909	0.0644453	0.16811	46.3456	68.0303	46.686	57.4015	34.9492	55.2346	84.6747	64.1817
ACAD8	799.618	-0.0168106	0.107479	-0.156409	0.875711	0.937086	795.102	804.135	740.609	785.357	859.34	771.075	801.385	839.943
ACAD9	2177.11	-0.167291	0.0937429	-1.78458	0.07433	0.18614	2051.08	2303.13	1988.4	2036.01	2128.82	2188.4	2497.9	2223.11
ACADM	900.001	0.217344	0.127715	1.70179	0.0887952	0.211023	967.746	832.255	1128.95	903.639	870.647	895.905	783.241	817.619
ACADS	158.368	-0.633059	0.234665	-2.69771	0.00698178	0.0311243	123.925	192.811	85.9446	152.201	133.629	176.751	238.904	162.78
ACADSB	760.614	-0.11483	0.121332	-0.946411	0.343939	0.541349	730.687	790.54	839.286	683.6	669.175	775.494	770.136	825.991
ACADVL	11207.8	-0.153558	0.0896305	-1.71324	0.0866688	0.207462	10611.9	11803.6	9867.72	10672.3	11295.8	11136.4	12389.7	11884.8
ACAP1	96.891	-0.676495	0.248847	-2.71852	0.00655755	0.0295872	74.4636	119.318	48.8081	80.0142	94.5685	124.83	115.924	117.201
ACAP2	2645.37	0.0555562	0.0902176	0.615803	0.538025	0.710575	2696.07	2594.68	2799.04	2760.49	2528.68	2730.8	2475.73	2577.5
ACAP3	646.789	-0.880997	0.181371	-4.85742	1.19e-06	2.33e-05	455	838.579	327.863	508.786	528.35	741.248	995.936	778.552
ACAT1	1633.22	0.265745	0.112813	2.35562	0.0184916	0.0660245	1783.48	1482.96	2045.69	1622.03	1682.7	1533.31	1426.37	1489.2
ACAT2	1449.47	0.333473	0.104355	3.19556	0.0013956	0.00870622	1616.62	1282.32	1798.47	1488.96	1562.44	1277.02	1250.97	1318.98
ACBD3	1487.74	0.312209	0.119227	2.61861	0.00882884	0.0375637	1648.12	1327.35	1809.08	1575.93	1559.35	1458.19	1148.15	1375.72
ACBD4	148.922	-0.189336	0.219565	-0.862322	0.38851	0.583603	139.096	158.747	97.6161	158.289	161.383	136.982	165.317	173.942
ACBD5	1481.35	-0.0904782	0.0899215	-1.00619	0.314324	0.509197	1434.87	1527.84	1451.51	1415.03	1438.06	1602.91	1449.55	1531.06
ACBD6	1639.21	-0.00532184	0.108654	-0.0489796	0.960936	0.980713	1636.57	1641.86	1853.65	1491.57	1564.49	1606.22	1704.58	1614.78
ACBD7	690.306	0.0752859	0.106177	0.70906	0.478287	0.661886	708.41	672.201	717.266	707.952	700.013	677.176	625.988	713.44
ACCS	323.566	-0.134386	0.158609	-0.84728	0.396839	0.590654	308.37	338.763	248.284	313.969	362.855	344.664	349.787	321.839
ACD	411.671	-0.596481	0.18199	-3.27754	0.00104715	0.00684041	327.569	495.773	241.918	363.543	377.246	444.086	584.658	458.574
ACE	32.8831	-0.527262	0.3656	-1.44218	0.149251	0.305609	26.7767	38.9894	20.1599	36.5282	23.6421	43.083	41.3293	32.5559
ACE2	8.84757	2.25709	0.742765	3.03876	0.00237551	0.0132962	14.62	3.07511	16.9767	10.4366	16.4467	4.41877	2.01606	2.79051
ACER2	125.585	-0.186254	0.22779	-0.817657	0.413553	0.605898	117.239	133.932	81.7005	148.722	121.294	135.877	131.044	134.875
ACER3	835.982	-0.0274742	0.11177	-0.245811	0.805829	0.898059	828.327	843.636	929.475	767.093	788.414	839.566	846.747	844.594
ACHE	47.583	-0.232982	0.322842	-0.721657	0.470505	0.655422	43.5595	51.6066	29.7093	60.8804	40.0888	53.0252	53.4257	48.3688
ACIN1	6277.28	0.0535088	0.0737839	0.725209	0.468324	0.653321	6393.84	6160.72	6414.02	6387.22	6380.29	5983.01	6280.04	6219.12
ACKR2	3.96396	-0.790542	0.970265	-0.814769	0.415204	NA	2.89491	5.033	2.12209	3.47888	3.08376	3.31408	8.06426	3.72068
ACKR3	3601.09	0.212002	0.114382	1.85345	0.0638185	0.16698	3865.12	3337.05	3296.67	3948.53	4350.15	3202.5	3514	3294.66
ACKR4	24.5183	0.238547	0.385551	0.618717	0.536103	0.709184	26.5865	22.4501	29.7093	24.3522	25.698	20.9891	22.1767	24.1844
ACLY	9150.09	-0.0627564	0.102208	-0.614008	0.53921	0.711433	8950.94	9349.24	7846.43	9232.95	9773.45	9058.48	9787.99	9201.24
ACMSD	9.97579	-0.327135	0.608478	-0.537629	0.590833	0.751666	8.86501	11.0866	8.48836	7.82748	10.2792	8.83754	15.1205	9.3017
ACO1	628.513	-0.429138	0.111055	-3.8642	0.000111455	0.00107849	535.561	721.464	496.569	565.318	544.797	713.631	694.534	756.228
ACO2	1470.38	-0.553463	0.164019	-3.37438	0.00073982	0.00517474	1191.42	1749.35	844.592	1364.59	1365.08	1695.7	1866.88	1685.47
ACOT1	159.512	-0.477517	0.23656	-2.01859	0.0435298	0.125838	133.315	185.709	89.1278	127.849	182.97	182.274	204.63	170.221
ACOT11	13.8796	0.0203101	0.54764	0.0370867	0.970416	0.985141	13.972	13.7872	18.0378	15.655	8.22335	11.0469	19.1526	11.162
ACOT13	770.81	0.143944	0.109266	1.31737	0.187716	0.358942	809.553	732.067	888.095	753.177	787.386	727.992	715.703	752.508
ACOT2	695.913	0.192655	0.111847	1.72249	0.0849801	0.204271	742.41	649.415	684.374	734.913	807.944	619.732	665.301	663.211
ACOT4	398.84	0.076611	0.126244	0.606851	0.54395	0.715473	409.717	387.963	441.395	376.589	411.168	384.433	372.972	406.484
ACOT6	12.9984	-0.321908	0.619639	-0.519509	0.603406	0.760933	11.584	14.4127	6.36627	7.82748	20.5584	16.5704	8.06426	18.6034
ACOT7	627.553	-0.36793	0.151581	-2.42729	0.0152121	0.0569757	547.841	707.265	445.639	557.49	640.393	673.862	802.393	645.538
ACOT8	210.344	-0.481514	0.164546	-2.92632	0.00343003	0.017681	175.414	245.275	150.668	184.381	191.193	239.718	269.145	226.961
ACOT9	557.853	0.221468	0.12445	1.77958	0.0751446	0.187541	600.788	514.918	683.313	567.057	551.992	520.31	497.968	526.476
ACOX1	1232.39	-0.164429	0.0985112	-1.66914	0.0950902	0.221364	1162.34	1302.45	1132.13	1153.25	1201.64	1316.79	1204.6	1385.95
ACOX2	108.106	-0.226352	0.19489	-1.16143	0.245465	0.431713	99.6325	116.58	101.86	103.497	93.5406	111.574	120.964	117.201
ACOX3	347.123	-0.268479	0.126015	-2.13052	0.0331283	0.10257	314.743	379.503	316.191	327.884	300.152	386.642	389.1	362.766
ACOXL	15.2499	0.297549	0.494925	0.601201	0.547706	0.718716	16.8228	13.6771	15.9157	19.1338	15.4188	9.94223	17.1365	13.9525
ACP1	3621.78	0.000226843	0.082083	0.00276358	0.997795	0.998884	3622.42	3621.14	3786.87	3525.84	3554.54	3561.53	3541.22	3760.68
ACP2	876.177	0.3428	0.112257	3.05371	0.0022603	0.0127664	980.127	772.227	981.466	934.079	1024.84	691.537	844.731	780.413
ACP5	42.8553	0.596735	0.310293	1.92314	0.0544628	0.148562	51.5534	34.1573	45.6249	50.4438	58.5914	34.2455	40.3213	27.9051
ACP6	573.38	-0.163059	0.107861	-1.51175	0.130597	0.278051	541.012	605.747	551.743	524.441	546.853	634.093	589.699	593.448
ACPP	93.3232	-0.13055	0.217651	-0.599811	0.548632	0.71932	88.9704	97.676	82.7615	89.5811	94.5685	113.783	92.7389	86.5058
ACPT	6.29046	-2.20835	0.87121	-2.5348	0.011251	0.0451725	2.19859	10.3823	1.06104	3.47888	2.05584	7.73284	14.1124	9.3017
ACR	3.39068	0.269586	1.09558	0.246068	0.80563	NA	3.71878	3.06258	5.30522	1.73944	4.11168	2.20938	6.04819	0.93017
ACRBP	16.9878	0.341922	0.480201	0.71204	0.47644	0.660917	18.9424	15.0333	16.9767	18.2641	21.5863	20.9891	11.0884	13.0224
ACRC	49.6717	0.184987	0.312193	0.592542	0.553488	0.723243	52.8678	46.4756	60.4796	42.6163	55.5076	59.6534	33.2651	46.5085
ACRV1	13.1521	0.434419	0.623272	0.696998	0.485804	0.667549	15.154	11.1501	20.1599	7.82748	17.4746	15.4657	4.03213	13.9525
ACSBG1	6.36927	-0.0424634	0.814832	-0.0521131	0.958439	0.979194	6.20039	6.53815	3.18313	11.3064	4.11168	8.83754	7.05622	3.72068
ACSBG2	22.8606	0.310086	0.440244	0.704349	0.481215	0.664055	25.3766	20.3445	35.0145	22.6127	18.5025	14.361	26.2088	20.4637
ACSF2	1065.02	-0.00031727	0.103271	-0.0030722	0.997549	0.998836	1065.07	1064.97	994.199	1061.06	1139.96	998.642	1085.65	1110.62
ACSF3	558.381	-0.389406	0.172015	-2.26379	0.0235869	0.0791721	483.302	633.46	362.877	534.008	553.02	563.393	738.887	598.099
ACSL1	1032.92	1.3315	0.0982919	13.5464	8.32e-42	1.06e-39	1478.25	587.585	1411.19	1495.05	1528.52	608.685	562.482	591.588
ACSL3	3351.31	0.136718	0.0812836	1.68198	0.0925719	0.217303	3509.64	3192.99	3503.57	3545.85	3479.51	3350.53	3167.24	3061.19
ACSL4	83.6807	0.321924	0.246895	1.30389	0.192271	0.365313	92.841	74.5203	97.6161	101.757	79.1498	91.6894	57.4578	74.4136
ACSL5	7.27049	0.362244	0.747884	0.484359	0.628131	0.780508	8.19077	6.3502	9.5494	7.82748	7.19543	7.73284	2.01606	9.3017
ACSL6	7.95913	-0.596187	0.716947	-0.831564	0.405655	0.598852	6.35691	9.56135	10.6104	4.3486	4.11168	13.2563	7.05622	8.37153
ACSM1	10.3726	0.97158	0.638322	1.52208	0.127988	0.273971	13.7741	6.97121	11.6715	12.1761	17.4746	3.31408	11.0884	6.51119
ACSM3	12.9605	0.472787	0.529995	0.892061	0.37236	0.568	15.0416	10.8794	16.9767	14.7852	13.3629	13.2563	10.0803	9.3017
ACSS1	878.778	-0.283932	0.0995288	-2.85276	0.00433415	0.0211854	792.557	964.998	754.403	784.487	838.782	959.977	990.895	944.123
ACSS2	1611.94	0.555221	0.0843709	6.58071	4.68e-11	2.16e-09	1918.35	1305.52	1902.45	1893.38	1959.21	1305.75	1322.54	1288.29
ACSS3	866.606	0.00810663	0.10357	0.0782718	0.937612	0.970041	868.923	864.289	892.339	899.29	815.14	843.985	917.309	831.572
ACTA2	20.2661	-0.217044	0.443628	-0.489248	0.624666	0.778151	18.7094	21.8228	14.8546	21.743	19.5305	24.3032	15.1205	26.0448
ACTB	70090.6	-0.230446	0.0822726	-2.80101	0.00509434	0.0241433	64504.7	75676.6	62312	63622.6	67579.5	72822.4	80430.9	73776.4
ACTG1	64490.1	-0.0786301	0.0865289	-0.908714	0.363501	0.560019	62733.3	66247	61838.8	61127.4	65233.8	63222.6	71904.9	63613.4
ACTG1P17	13.6908	0.229436	0.55392	0.414204	0.678725	0.81669	14.8486	12.533	21.2209	13.0458	10.2792	8.83754	11.0884	17.6732
ACTG1P20	65.1926	0.0762781	0.258949	0.294568	0.768324	0.876141	66.8854	63.4998	75.3342	73.9262	51.3959	62.9674	61.4899	66.0421
ACTG2	17.3504	-0.505306	0.463323	-1.09061	0.275443	0.465276	14.376	20.3248	13.7936	13.9155	15.4188	15.4657	23.1847	22.3241
ACTL10	38.9924	0.00568001	0.310984	0.0182646	0.985428	0.991799	39.08	38.9048	42.4418	40.8768	33.9213	37.5595	37.2972	41.8576
ACTL6A	3105.48	0.155025	0.0938865	1.6512	0.0986976	0.227013	3272.46	2938.5	3566.17	3150.99	3100.2	2957.26	2806.36	3051.89
ACTL6B	4.51436	-1.08051	1.19555	-0.903781	0.366111	NA	2.88387	6.14485	1.06104	3.47888	4.11168	3.31408	15.1205	0
ACTN1	3905.84	-0.204833	0.140545	-1.45742	0.145	0.299433	3628.81	4182.87	2773.57	3907.65	4205.22	4057.53	4305.3	4185.76
ACTN4	6850.53	-0.458229	0.160102	-2.8621	0.00420842	0.0207164	5771.41	7929.65	4256.91	6472.46	6584.85	7104.27	9154.95	7529.73
ACTR10	1919.34	0.224265	0.112652	1.99078	0.046505	0.132122	2068.38	1770.31	2371.44	1912.51	1921.18	1871.35	1695.51	1744.07
ACTR1A	2783.03	-0.050511	0.0872202	-0.579121	0.562508	0.730296	2734.65	2831.41	2661.1	2677	2865.84	2676.67	2869.87	2947.71
ACTR1B	1688.31	-0.487149	0.142582	-3.41662	0.000634029	0.00455802	1405.71	1970.92	1108.79	1515.05	1593.27	1853.67	2201.54	1857.55
ACTR2	8372.68	0.0219631	0.0878731	0.249941	0.802633	0.896019	8436.52	8308.84	9002.97	8314.52	7992.07	8564.68	7817.29	8544.54
ACTR3	4198.52	0.342796	0.106294	3.22497	0.00125988	0.00799779	4695.25	3701.8	5389.05	4337.29	4359.4	3769.21	3660.16	3676.03
ACTR3B	380.614	-0.291841	0.129561	-2.25254	0.024288	0.0808436	342.538	418.691	380.915	315.708	330.99	406.527	425.389	424.158
ACTR3C	68.0644	0.34864	0.254883	1.36785	0.17136	0.336165	76.1894	59.9394	75.3342	73.0565	80.1777	72.9097	47.3775	59.5309
ACTR5	394.217	-0.00965354	0.123785	-0.0779862	0.937839	0.970041	392.875	395.559	375.61	400.071	402.944	402.108	366.924	417.646
ACTR6	1306.55	0.2832	0.122898	2.30434	0.0212033	0.073235	1434.47	1178.62	1595.81	1344.59	1363.02	1288.07	1018.11	1229.68
ACTR8	786.016	0.0419259	0.104708	0.400408	0.688856	0.823198	797.328	774.704	779.868	840.149	771.967	776.599	730.823	816.689
ACTRT3	33.2583	-0.334188	0.356183	-0.938247	0.348117	0.54544	29.4466	37.07	36.0755	23.4824	28.7817	46.3971	32.257	32.5559
ACVR1	481.567	0.206715	0.125355	1.64904	0.0991404	0.227863	516.273	446.861	547.499	473.997	527.322	456.238	406.237	478.107
ACVR1B	1602.11	0.0980387	0.0977532	1.00292	0.315899	0.510978	1656.12	1548.1	1506.68	1770.75	1690.93	1584.13	1528.18	1531.99
ACVR1C	19.6097	0.572122	0.472853	1.20993	0.226304	0.408664	23.3396	15.8798	19.0988	25.2219	25.698	24.3032	13.1044	10.2319
ACVR2A	170.103	0.485731	0.181777	2.67213	0.00753711	0.033168	198.652	141.554	233.43	182.641	179.886	140.296	129.028	155.338
ACVR2B	1262.75	-0.114669	0.102025	-1.12393	0.261041	0.449331	1212.16	1313.33	1160.78	1325.45	1150.24	1305.75	1372.94	1261.31
ACVR2B-AS1	88.6037	-0.174633	0.21808	-0.800776	0.423262	0.614713	83.4009	93.8065	87.0057	74.7959	88.401	83.9566	99.7952	97.6678
ACVRL1	2.76049	1.19251	1.16147	1.02672	0.30455	NA	3.8284	1.69259	3.18313	5.21832	3.08376	2.20938	1.00803	1.86034
ACY1	2.83668	-1.68552	1.37365	-1.22703	0.219811	NA	1.37056	4.30281	0	0	4.11168	2.20938	6.04819	4.65085
ACY3	3.19209	4.06176	1.52802	2.65818	0.00785629	NA	6.01595	0.368231	3.18313	8.6972	6.16751	1.10469	0	0
ACYP1	305.874	0.276451	0.147259	1.87731	0.0604761	0.160398	335.38	276.368	381.976	298.314	325.85	258.498	294.345	276.26
ACYP2	52.8446	-0.00418676	0.295784	-0.0141548	0.988706	0.993235	52.8568	52.8325	59.4185	42.6163	56.5355	59.6534	39.3132	59.5309
ADA	147.551	-0.278992	0.186568	-1.49539	0.134812	0.284219	133.358	161.743	113.532	131.328	155.216	159.076	152.213	173.942
ADAL	398.279	0.100973	0.131519	0.767749	0.442636	0.631781	412.457	384.101	461.554	368.761	407.056	391.061	378.012	383.23
ADAM10	1383.22	-0.000557763	0.103981	-0.0053641	0.99572	0.997455	1382.9	1383.55	1507.74	1388.94	1252.01	1444.94	1334.63	1371.07
ADAM11	141.68	-0.708054	0.222256	-3.18576	0.00144374	0.00892048	107.6	175.761	84.8836	99.1481	138.769	169.018	206.647	151.618
ADAM12	5.80436	0.343672	0.883923	0.388803	0.697422	0.82916	6.46653	5.1422	8.48836	7.82748	3.08376	8.83754	1.00803	5.58102
ADAM15	3998.85	-0.714117	0.164524	-4.34052	1.42e-05	0.000192857	3028.64	4969.05	2157.1	3291.02	3637.8	4685	5509.9	4712.24
ADAM17	1621.93	0.201254	0.0835385	2.40912	0.015991	0.0592779	1734.81	1509.05	1756.03	1742.05	1706.35	1521.16	1513.06	1492.92
ADAM19	2.63614	0.367799	1.30479	0.281885	0.778032	NA	2.99181	2.28048	6.36627	2.60916	0	1.10469	2.01606	3.72068
ADAM1A	398.643	0.203657	0.122229	1.6662	0.0956745	0.2221	426.882	370.403	424.418	407.029	449.201	373.386	351.803	386.021
ADAM2	2.45222	-0.631854	1.19208	-0.530042	0.596083	NA	1.91972	2.98472	2.12209	2.60916	1.02792	2.20938	3.0241	3.72068
ADAM20	2.82518	0.535579	1.21561	0.440584	0.659514	NA	3.37614	2.27421	5.30522	1.73944	3.08376	0	4.03213	2.79051
ADAM20P1	18.6229	-0.280398	0.495913	-0.565418	0.57179	0.737201	16.7215	20.5244	13.7936	26.0916	10.2792	23.1985	15.1205	23.2542
ADAM21	3.55958	-0.200935	1.13174	-0.177546	0.85908	NA	3.30132	3.81784	3.18313	2.60916	4.11168	7.73284	0	3.72068
ADAM22	340.146	-0.0141746	0.133635	-0.10607	0.915527	0.957842	338.36	341.932	354.389	357.455	303.236	352.397	324.586	348.814
ADAM23	3.88497	0.778418	1.15752	0.672488	0.501273	NA	4.85632	2.91363	3.18313	5.21832	6.16751	7.73284	1.00803	0
ADAM28	1.82361	-0.453268	1.62692	-0.278606	0.780547	NA	1.50227	2.14494	0	3.47888	1.02792	4.41877	2.01606	0
ADAM32	44.7054	0.100466	0.301803	0.332888	0.739219	0.857057	46.2031	43.2077	45.6249	42.6163	50.368	53.0252	40.3213	36.2766
ADAM8	188.118	-1.06084	0.204831	-5.1791	2.23e-07	5.5e-06	121.938	254.298	117.776	122.63	125.406	204.368	330.634	227.892
ADAM9	1807.74	0.1544	0.0939405	1.64359	0.100261	0.229724	1904.39	1711.09	2009.62	1870.77	1832.78	1799.54	1601.76	1731.98
ADAMTS10	2.95058	0.272708	1.11019	0.24564	0.805961	NA	3.22651	2.67466	1.06104	3.47888	5.13959	2.20938	3.0241	2.79051
ADAMTS13	224.301	-0.720288	0.218518	-3.29624	0.000979866	0.00646071	169.149	279.453	113.532	207.863	186.053	264.021	330.634	243.705
ADAMTS14	3.82786	0.0498145	1.01822	0.0489229	0.960981	NA	3.87009	3.78562	2.12209	4.3486	5.13959	6.62815	1.00803	3.72068
ADAMTS15	22.2446	-0.36403	0.412896	-0.88165	0.377966	0.573339	19.4874	25.0018	21.2209	15.655	21.5863	28.722	21.1687	25.1146
ADAMTS17	50.491	-0.20206	0.331438	-0.609646	0.542096	0.713948	46.8169	54.165	28.6482	52.1832	59.6193	66.2815	53.4257	42.7878
ADAMTS19	2320.8	-0.055737	0.083735	-0.665636	0.505644	0.683811	2275.96	2365.64	2374.62	2281.28	2171.99	2389.45	2358.79	2348.68
ADAMTS19-AS1	102.072	-0.458359	0.243607	-1.88155	0.0598969	0.159243	85.8765	118.268	61.5406	97.4086	98.6802	103.841	142.132	108.83
ADAMTS20	54.2323	0.0993517	0.32698	0.303847	0.761245	0.871848	55.8686	52.5959	42.4418	74.7959	50.368	62.9674	59.4739	35.3465
ADAMTS4	3.67117	-1.23916	1.1901	-1.04122	0.297776	NA	2.13481	5.20753	0	4.3486	2.05584	6.62815	8.06426	0.93017
ADAMTS6	20.5043	-0.399698	0.430793	-0.927819	0.353502	0.550542	17.6798	23.3289	22.2819	17.3944	13.3629	25.4079	23.1847	21.3939
ADAMTS7	11.6934	-1.02184	0.599929	-1.70327	0.0885183	0.210558	7.68746	15.6994	4.24418	9.56692	9.25127	11.0469	21.1687	14.8827
ADAMTS9	486.617	0.240966	0.114755	2.09983	0.035744	0.108504	526.938	446.296	498.691	560.969	521.155	451.819	441.518	445.551
ADAMTS9-AS1	4.17927	0.181865	0.973708	0.186775	0.851837	NA	4.44991	3.90862	2.12209	6.08804	5.13959	1.10469	5.04016	5.58102
ADAMTSL3	61.6734	1.2204	0.296271	4.11922	3.8e-05	0.000437074	86.2881	37.0588	73.2121	86.972	98.6802	30.9314	51.4096	28.8353
ADAMTSL4	67.7328	-0.410369	0.291897	-1.40587	0.159763	0.321205	58.1066	77.359	37.1366	65.229	71.9543	64.0721	91.7309	76.2739
ADAMTSL4-AS1	35.913	0.617227	0.433559	1.42363	0.154554	0.313819	43.5165	28.3096	71.09	23.4824	35.9772	37.5595	23.1847	24.1844
ADAMTSL5	208.443	-0.524329	0.156356	-3.35342	0.000798202	0.00549206	170.883	246.002	155.974	169.595	187.081	262.917	237.896	237.193
ADAP1	354.143	-0.605584	0.17644	-3.43224	0.000598626	0.00434528	280.682	427.605	209.026	317.448	315.571	383.328	481.839	417.646
ADAP2	90.2331	0.120867	0.218543	0.553057	0.580224	0.743962	94.1039	86.3624	92.3109	91.3206	98.6802	83.9566	75.6024	99.5282
ADAR	31211.9	1.36739	0.0872972	15.6636	2.68e-55	4.01e-53	44987	17436.8	40878.9	47498	46584.3	17243.1	17399.6	17667.6
ADARB1	948.659	-0.527775	0.105092	-5.02203	5.11e-07	1.13e-05	776.816	1120.5	731.06	814.058	785.33	1080.39	1208.63	1072.49
ADARB2	2.52793	-1.07061	1.20679	-0.887155	0.374996	NA	1.61877	3.43708	1.06104	1.73944	2.05584	4.41877	4.03213	1.86034
ADAT1	1256.78	0.0523077	0.111452	0.469328	0.638835	0.787997	1279.35	1234.22	1105.61	1355.02	1377.41	1220.68	1231.81	1250.15
ADAT2	459.028	0.383165	0.126445	3.03029	0.00244317	0.013548	519.686	398.37	566.598	522.702	469.759	405.422	372.972	416.716
ADAT3	16.6763	-2.15248	0.578588	-3.72023	0.00019904	0.00174932	6.06868	27.284	3.18313	7.82748	7.19543	20.9891	41.3293	19.5336
ADCK1	365.532	-0.240424	0.133767	-1.79734	0.0722817	0.182366	335.142	395.921	303.459	333.972	367.995	402.108	368.94	416.716
ADCK2	739.821	-0.227127	0.109718	-2.0701	0.0384425	0.114698	681.441	798.201	615.406	711.431	717.487	803.111	818.522	772.971
ADCK3	515.501	-0.342809	0.128062	-2.67689	0.00743084	0.0327561	454.578	576.423	426.54	459.212	477.982	519.205	649.173	560.893
ADCK4	481.332	-0.797363	0.169231	-4.71169	2.46e-06	4.42e-05	351.417	611.247	264.2	369.631	420.419	592.115	684.454	557.172
ADCK5	113.008	-1.17448	0.266108	-4.41352	1.02e-05	0.000146159	69.2161	156.8	43.5028	80.8839	83.2614	143.61	196.566	130.224
ADCY1	1888.14	-0.537621	0.133513	-4.02673	5.66e-05	0.000614311	1539.98	2236.29	1255.22	1727.26	1637.47	2091.18	2484.8	2132.88
ADCY10P1	20.6353	0.274033	0.493316	0.555492	0.578558	0.742552	22.4834	18.7872	25.4651	23.4824	18.5025	30.9314	16.1285	9.3017
ADCY3	1290.33	-0.473543	0.170786	-2.77272	0.00555896	0.0258325	1080.21	1500.44	783.051	1227.17	1230.42	1322.32	1741.88	1437.11
ADCY4	5.40616	0.0360893	0.834504	0.0432464	0.965505	0.982934	5.46926	5.34306	6.36627	6.95776	3.08376	3.31408	8.06426	4.65085
ADCY5	50.2988	-0.340869	0.274686	-1.24094	0.214628	0.39395	44.3844	56.2132	45.6249	44.3557	43.1726	54.1299	61.4899	53.0197
ADCY6	4568.33	0.0185315	0.0992674	0.186683	0.851909	0.92588	4597.59	4539.07	4123.22	4707.79	4961.76	4323.76	4794.2	4499.23
ADCY7	225.175	0.204421	0.162512	1.25788	0.208435	0.385869	241.031	209.32	207.965	270.483	244.645	190.007	214.711	223.241
ADCY9	1039.27	-0.315369	0.1488	-2.11942	0.0340548	0.104678	925.838	1152.71	708.778	1048.01	1020.72	1085.91	1243.91	1128.3
ADD1	3557.51	-0.0535005	0.0955374	-0.559995	0.575483	0.739961	3491.43	3623.58	3141.75	3569.33	3763.21	3538.33	3707.54	3624.87
ADD3	547.061	-0.150463	0.117886	-1.27634	0.201834	0.377203	518.613	575.508	549.621	526.181	480.038	581.068	535.265	610.192
ADGRA2	30.3978	-0.173822	0.380625	-0.456675	0.647905	0.794198	28.4679	32.3278	18.0378	36.5282	30.8376	35.3501	27.2169	34.4163
ADGRA3	1071.75	-0.400541	0.112271	-3.56763	0.000360222	0.00286718	923.535	1219.96	844.592	1035.84	890.178	1214.06	1161.25	1284.56
ADGRB1	51.8409	-0.638867	0.321592	-1.98658	0.0469694	0.132942	40.6259	63.0559	33.9534	36.5282	51.3959	44.1877	82.6586	62.3214
ADGRB2	113.7	-0.558211	0.224828	-2.48284	0.013034	0.0507145	91.9197	135.48	77.4563	96.5389	101.764	117.097	169.349	119.992
ADGRD1	24.5688	0.703989	0.419169	1.67949	0.0930573	0.218113	30.4668	18.6707	20.1599	32.1796	39.0609	15.4657	19.1526	21.3939
ADGRE1	28.1001	4.3358	0.632905	6.85064	7.35e-12	3.74e-10	53.6617	2.53863	45.6249	60.8804	54.4797	1.10469	0	6.51119
ADGRE2	18.4846	-0.11937	0.495691	-0.240816	0.809698	0.899795	17.6525	19.3168	9.5494	26.9613	16.4467	15.4657	20.1606	22.3241
ADGRE4P	3.48677	0.992866	1.11036	0.894186	0.371222	NA	4.66084	2.3127	2.12209	2.60916	9.25127	2.20938	1.00803	3.72068
ADGRE5	251.715	-0.51376	0.168992	-3.04015	0.0023646	0.0132584	207.286	296.144	166.584	209.602	245.673	286.115	319.546	282.772
ADGRF3	13.7039	-0.146415	0.518007	-0.28265	0.777445	0.881905	13.014	14.3939	9.5494	13.0458	16.4467	13.2563	14.1124	15.8129
ADGRF4	82.4791	1.25835	0.254251	4.94924	7.45e-07	1.55e-05	116.434	48.5242	95.494	130.458	123.35	38.6642	47.3775	59.5309
ADGRG1	1729.82	-0.607522	0.145061	-4.18805	2.81e-05	0.00034118	1370.75	2088.9	1098.18	1422.86	1591.22	1924.37	2388.03	1954.29
ADGRG2	232.199	-0.0377616	0.156537	-0.24123	0.809377	0.899687	229.015	235.383	200.537	235.694	250.812	236.404	253.016	216.73
ADGRG6	2628.76	-0.0441219	0.0999474	-0.441452	0.658886	0.802822	2587.97	2669.56	2375.68	2820.5	2567.74	2847.9	2567.46	2593.31
ADGRL1	2465.66	-0.479057	0.151378	-3.16464	0.00155277	0.00943268	2059.87	2871.45	1698.73	2203	2277.87	2481.14	3499.89	2633.31
ADGRL2	91.4881	-0.687159	0.235491	-2.91798	0.00352306	0.0180884	69.9863	112.99	66.8458	72.1867	70.9264	120.411	132.052	86.5058
ADGRL3	4.36681	-0.332796	0.982061	-0.338875	0.734704	NA	3.81736	4.91627	2.12209	5.21832	4.11168	9.94223	2.01606	2.79051
ADGRV1	324.136	-0.00198113	0.154422	-0.0128294	0.989764	0.993798	323.451	324.821	284.36	376.589	309.404	360.13	318.538	295.794
ADH5	3252.24	0.151143	0.0904009	1.67191	0.0945412	0.220426	3422.75	3081.72	3651.06	3257.97	3359.24	3130.7	2908.17	3206.3
ADH6	3.85651	-0.132083	0.986166	-0.133936	0.893453	NA	3.70774	4.00528	4.24418	1.73944	5.13959	4.41877	2.01606	5.58102
ADHFE1	19.1341	-0.682842	0.512961	-1.33118	0.183131	0.353266	14.6369	23.6313	8.48836	20.0036	15.4188	24.3032	13.1044	33.4861
ADI1	3260.32	-0.167502	0.0873025	-1.91863	0.0550307	0.149795	3071.61	3449.03	3283.93	2871.81	3059.09	3487.51	3450.49	3409.07
ADIPOR1	5399.55	-0.00915591	0.087363	-0.104803	0.916532	0.958075	5382.35	5416.75	4983.73	5447.06	5716.26	5419.62	5258.9	5571.72
ADIPOR2	10928.9	0.264268	0.0725013	3.645	0.000267389	0.00223126	11926.9	9930.79	11904.9	12040.4	11835.5	10105.7	9628.72	10057.9
ADIRF	668.075	-0.47807	0.144355	-3.31176	0.000927124	0.00618388	558.257	777.893	481.714	600.976	592.081	678.281	911.261	744.136
ADK	1581.99	0.0439648	0.0992753	0.442858	0.657869	0.802293	1606.39	1557.59	1764.52	1510.7	1543.93	1581.92	1503.98	1586.87
ADM	256.71	0.298714	0.155595	1.91981	0.0548813	0.149519	283.183	230.236	269.505	280.92	299.124	213.206	269.145	208.358
ADM2	179.643	-0.150118	0.214023	-0.701412	0.483046	0.665199	170.081	189.205	122.02	193.948	194.277	187.798	220.759	159.059
ADM5	150.027	-0.72207	0.189926	-3.80185	0.000143619	0.00132923	113.073	186.98	89.1278	122.63	127.462	187.798	194.55	178.593
ADNP	7572	0.0852154	0.0751619	1.13376	0.256896	0.444662	7795.26	7348.74	7619.36	7961.42	7804.99	7575.98	7160.05	7310.21
ADNP-AS1	89.0454	0.225101	0.242931	0.926605	0.354132	0.551413	95.8372	82.2535	101.86	98.2783	87.3731	106.05	63.506	77.2041
ADNP2	844.031	-0.0210454	0.107553	-0.195674	0.844865	0.921385	837.776	850.286	824.432	830.582	858.312	843.985	927.389	779.482
ADO	887.607	0.0652361	0.113819	0.573158	0.566537	0.733506	907.537	867.676	996.321	913.206	813.084	915.79	865.899	821.34
ADORA1	185.277	-0.585946	0.195231	-3.00129	0.00268837	0.014651	148.16	222.394	112.471	146.983	185.025	216.52	210.679	239.984
ADORA2A	2.67687	-0.789314	1.4027	-0.56271	0.573632	NA	1.96141	3.39233	1.06104	1.73944	3.08376	1.10469	9.07229	0
ADORA2A-AS1	10.0945	-0.182273	0.626119	-0.291115	0.770963	0.877475	9.46443	10.7246	5.30522	8.6972	14.3909	8.83754	13.1044	10.2319
ADORA2B	277.385	0.197741	0.15411	1.28311	0.199453	0.374919	296.521	258.249	327.863	257.437	304.264	280.592	231.847	262.308
ADPGK	1639.43	0.239866	0.0902378	2.65815	0.00785703	0.0342073	1775.73	1503.13	1762.4	1689.87	1874.92	1463.72	1509.02	1536.64
ADPGK-AS1	5.78149	0.685531	0.866404	0.791236	0.428806	0.619538	7.09908	4.46391	8.48836	8.6972	4.11168	7.73284	1.00803	4.65085
ADPRH	83.7602	0.854367	0.236519	3.61226	0.000303542	0.00248616	108.052	59.4681	115.654	91.3206	117.183	54.1299	55.4418	68.8326
ADPRHL1	245.166	-0.283005	0.169747	-1.66722	0.0954715	0.221763	221.229	269.103	199.476	222.648	241.561	230.881	321.562	254.867
ADPRHL2	915.454	0.737714	0.128432	5.74402	9.25e-09	3.11e-07	1144.7	686.205	1010.11	1123.68	1300.32	617.523	749.976	691.116
ADPRM	131.435	0.354101	0.187399	1.88956	0.058817	0.157182	147.688	115.183	150.668	133.067	159.327	107.155	111.892	126.503
ADRA2A	34.6726	0.147307	0.335406	0.439191	0.660523	0.803825	36.4156	32.9296	37.1366	33.0494	39.0609	36.4548	36.2891	26.0448
ADRA2B	35.8899	-0.433121	0.330266	-1.31143	0.189712	0.361548	30.5355	41.2443	31.8313	33.0494	26.7259	35.3501	48.3855	39.9973
ADRA2C	232.511	-1.03209	0.184778	-5.5856	2.33e-08	7.29e-07	152.613	312.41	132.631	161.768	163.439	273.964	386.076	277.191
ADRB1	70.832	0.373727	0.254262	1.46985	0.141603	0.294574	79.8825	61.7814	93.3719	77.4051	68.8706	74.0144	56.4498	54.88
ADRBK1	1908.17	-0.66163	0.16227	-4.07733	4.56e-05	0.000513476	1477.92	2338.41	1101.36	1605.5	1726.9	2111.07	2713.62	2190.55
ADRBK2	213.409	-0.052978	0.147405	-0.359404	0.719293	0.843086	209.571	217.246	216.453	208.733	203.528	210.996	214.711	226.031
ADRM1	1613.98	-0.68846	0.169769	-4.05526	5.01e-05	0.000553604	1235.82	1992.14	962.368	1375.9	1369.19	1694.6	2483.79	1798.02
ADSL	1587.44	-0.0502157	0.102689	-0.489006	0.624837	0.778151	1560.24	1614.65	1714.65	1443.73	1522.35	1612.85	1537.25	1693.84
ADSS	1311.59	0.312904	0.116616	2.68321	0.00729199	0.0322447	1453.4	1169.78	1674.33	1379.38	1306.48	1214.06	1126.98	1168.29
ADSSL1	291.961	-0.294868	0.156431	-1.88497	0.0594337	0.158364	262.23	321.691	236.613	270.483	279.594	279.487	373.98	311.607
AEBP1	70.7154	-0.0946749	0.257697	-0.367388	0.71333	0.838757	68.5751	72.8557	80.6394	58.2712	66.8147	58.5487	84.6747	75.3438
AEBP2	1072.6	0.127692	0.119068	1.07242	0.28353	0.474619	1120.22	1024.98	1276.44	1030.62	1053.62	1090.33	946.542	1038.07
AEN	999.032	-0.0700864	0.106835	-0.656027	0.511806	0.689083	974.62	1023.44	888.095	997.569	1038.2	997.537	1088.67	984.12
AES	2839.65	-0.50006	0.121096	-4.12945	3.64e-05	0.000422129	2352.08	3327.21	2005.37	2533.49	2517.37	3137.33	3710.57	3133.74
AFAP1	651.877	-0.591549	0.151425	-3.90655	9.36e-05	0.000929697	519.657	784.097	396.831	607.064	555.076	782.122	795.337	774.832
AFAP1-AS1	5.73447	-1.3567	0.874237	-1.55187	0.120694	0.262614	3.17377	8.29517	1.06104	4.3486	4.11168	13.2563	6.04819	5.58102
AFAP1L1	1.7437	-0.818184	1.61422	-0.506862	0.612252	NA	1.26509	2.2223	0	1.73944	2.05584	0	2.01606	4.65085
AFAP1L2	158.294	-0.538784	0.176998	-3.044	0.00233451	0.013133	128.854	187.734	118.837	144.373	123.35	202.159	170.357	190.685
AFF1	1852.29	0.495407	0.0918042	5.39634	6.8e-08	1.93e-06	2166.96	1537.62	2018.11	2283.01	2199.75	1523.37	1582.61	1506.88
AFF2	2.24316	-0.890727	1.38733	-0.642046	0.520843	NA	1.56604	2.92028	1.06104	2.60916	1.02792	0	5.04016	3.72068
AFF3	201.502	-0.300292	0.165552	-1.81388	0.0696961	0.177661	180.536	222.468	159.157	197.426	185.025	197.74	239.912	229.752
AFF4	5599.34	0.109294	0.0861972	1.26796	0.204813	0.3813	5810.8	5387.88	5616.11	6270.68	5545.62	5522.36	5348.62	5292.67
AFG3L1P	1394.4	0.0741163	0.10189	0.727418	0.46697	0.652371	1430.17	1358.63	1298.72	1443.73	1548.05	1359.88	1311.45	1404.56
AFG3L2	2418.87	0.0926283	0.0894943	1.03502	0.30066	0.494494	2496.72	2341.02	2579.4	2490.01	2420.75	2318.75	2209.61	2494.72
AFMID	659.933	-0.166606	0.115663	-1.44045	0.149741	0.306411	622.173	697.692	638.749	574.015	653.756	655.082	758.04	679.954
AFTPH	1653.64	0.245542	0.0935796	2.62389	0.00869331	0.0371194	1793.9	1513.37	1854.71	1728.13	1798.86	1588.55	1543.3	1408.28
AGA	298.435	-0.0130485	0.157336	-0.0829339	0.933904	0.967815	297.311	299.559	348.023	247.87	296.041	318.151	290.313	290.213
AGAP1	1560.47	-0.342835	0.102088	-3.35823	0.000784431	0.00542081	1375.46	1745.49	1246.73	1506.35	1373.3	1729.95	1803.37	1703.14
AGAP1-IT1	4.99458	-0.593575	0.862881	-0.687899	0.491516	NA	4.01973	5.96944	6.36627	2.60916	3.08376	4.41877	6.04819	7.44136
AGAP11	96.934	0.034863	0.211438	0.164885	0.869035	0.934505	98.0206	95.8474	103.982	96.5389	93.5406	110.469	88.7068	88.3661
AGAP2	273.001	-0.482567	0.181167	-2.66366	0.00772956	0.033804	227.727	318.275	185.683	237.434	260.063	269.545	382.044	303.235
AGAP2-AS1	18.6997	-0.926291	0.525506	-1.76266	0.0779571	0.191907	12.7851	24.6142	5.30522	21.743	11.3071	19.8845	24.1928	29.7654
AGAP3	1527.87	-0.568213	0.146174	-3.88724	0.00010139	0.000997893	1230.62	1825.13	1006.93	1316.76	1368.16	1663.67	2154.16	1657.56
AGAP4	142.924	-0.0751261	0.188593	-0.398351	0.690372	0.824311	139.381	146.467	152.79	134.807	130.546	122.621	163.301	153.478
AGAP5	118.398	-0.104787	0.192488	-0.54438	0.58618	0.74826	114.105	122.692	107.166	108.715	126.434	122.621	131.044	114.411
AGAP6	488.545	-0.0103509	0.132067	-0.0783762	0.937529	0.970041	486.619	490.47	430.784	485.304	543.769	505.949	517.12	448.342
AGAP7P	81.0489	0.107527	0.261346	0.411437	0.680752	0.817741	84.0873	78.0106	66.8458	71.317	114.099	82.8519	78.6265	72.5533
AGAP9	18.5929	-0.506341	0.454184	-1.11484	0.26492	0.454145	15.3818	21.804	11.6715	13.9155	20.5584	20.9891	21.1687	23.2542
AGBL2	122.087	1.26746	0.215304	5.88685	3.94e-09	1.43e-07	172.747	71.4266	205.843	153.071	159.327	61.8628	70.5622	81.855
AGBL3	19.1799	0.579847	0.482388	1.20203	0.229351	0.412104	22.9315	15.4284	25.4651	21.743	21.5863	17.6751	21.1687	7.44136
AGBL4	8.10185	-0.541469	0.69795	-0.775799	0.437868	0.627646	6.65538	9.54832	6.36627	4.3486	9.25127	6.62815	8.06426	13.9525
AGBL5	1374.67	-0.210791	0.0950013	-2.21882	0.0264987	0.0863503	1274.52	1474.82	1201.1	1275.88	1346.57	1431.68	1450.56	1542.22
AGER	293.56	-0.123772	0.144251	-0.858032	0.390875	0.585934	280.993	306.127	264.2	276.571	302.208	287.22	343.739	287.423
AGFG1	1496.71	0.150653	0.085287	1.76642	0.0773253	0.191172	1574.81	1418.61	1572.47	1546.36	1605.61	1425.05	1436.45	1394.32
AGFG2	555.101	-0.413015	0.139727	-2.95586	0.00311794	0.0164102	476.208	633.994	418.052	473.997	536.574	571.126	719.735	611.122
AGGF1	1878.81	0.210032	0.101273	2.07392	0.0380871	0.113967	2015.38	1742.24	2190	1924.69	1931.46	1862.51	1622.93	1741.28
AGK	1476.05	0.211095	0.0939331	2.24729	0.0246213	0.0817077	1583.97	1368.12	1631.89	1507.22	1612.8	1428.37	1287.26	1388.74
AGL	954.745	-0.125604	0.103949	-1.20833	0.226922	0.409391	912.816	996.673	880.667	975.826	881.954	1057.19	938.478	994.352
AGMAT	263.678	-0.334759	0.138506	-2.41692	0.0156524	0.058329	233.107	294.25	216.453	244.391	238.477	289.429	299.385	293.934
2001-08-01	1541.16	-0.0515267	0.0868611	-0.593208	0.553042	0.722844	1513.53	1568.79	1510.93	1557.67	1471.98	1578.61	1524.14	1603.61
2002-08-01	738.69	-0.807	0.156027	-5.17218	2.31e-07	5.69e-06	536.761	940.618	429.723	658.378	522.183	934.57	1035.25	852.036
2003-08-01	252.19	0.135115	0.13988	0.965938	0.334075	0.531487	263.961	240.419	273.75	265.265	252.868	249.66	228.823	242.774
2004-08-01	576.243	0.316311	0.125586	2.51867	0.0117798	0.0468205	639.156	513.331	672.702	655.769	588.998	536.88	450.59	552.521
AGPAT1	1145.99	-0.252311	0.10607	-2.37872	0.0173728	0.062942	1046.05	1245.93	982.527	1039.32	1116.32	1180.92	1358.83	1198.06
AGPAT2	356.993	-0.828897	0.219677	-3.77325	0.000161137	0.00146573	257.068	456.918	188.866	285.268	297.069	347.978	608.851	413.926
AGPAT3	2096.91	-0.136878	0.102727	-1.33245	0.182714	0.35268	1997.33	2196.49	1769.82	2088.2	2133.96	2116.59	2284.2	2188.69
AGPAT4	2.62911	1.55568	1.21869	1.27652	0.201771	NA	3.93387	1.32435	3.18313	3.47888	5.13959	1.10469	1.00803	1.86034
AGPAT5	1724.24	0.143537	0.0856521	1.67582	0.0937744	0.219322	1810.11	1638.37	1860.01	1772.49	1797.83	1652.62	1582.61	1679.89
AGPAT6	1639.21	-0.0263109	0.0877742	-0.299757	0.764362	0.873356	1624.02	1654.41	1579.9	1674.21	1617.94	1707.85	1586.64	1668.72
AGPAT9	70.9586	0.689333	0.254055	2.71332	0.00666123	0.0299331	87.7215	54.1957	94.433	78.2748	90.4569	54.1299	43.3454	65.1119
AGR2	2967.1	0.527234	0.121733	4.33108	1.48e-05	0.000199912	3503.66	2430.55	4125.34	3056.2	3329.43	2493.29	2283.19	2515.18
AGR3	33.0319	0.573197	0.373169	1.53602	0.124533	0.268473	39.4602	26.6036	43.5028	34.7888	40.0888	37.5595	17.1365	25.1146
AGRN	4328.67	-0.515421	0.377241	-1.36629	0.171847	0.336731	3563.48	5093.87	2208.03	4328.6	4153.82	3989.04	6904.01	4388.54
AGRP	2.22026	-0.987462	1.51684	-0.651	0.515046	NA	1.44953	2.99099	0	4.3486	0	3.31408	1.00803	4.65085
AGTPBP1	498.15	0.117896	0.124809	0.944611	0.344857	0.542319	518.465	477.834	570.842	509.656	474.899	511.472	448.574	473.457
AGTR1	170.444	0.266076	0.175253	1.51824	0.128954	0.275385	186.019	154.87	204.782	193.948	159.327	167.913	144.149	152.548
AGTRAP	349.827	-0.95629	0.219033	-4.36597	1.27e-05	0.000174146	237.896	461.757	154.913	245.261	313.515	389.956	542.321	452.993
AHCTF1	1998.83	0.0804211	0.0952326	0.84447	0.398407	0.592192	2054.17	1943.48	2035.08	2179.52	1947.91	2045.89	1814.46	1970.1
AHCTF1P1	42.5035	0.0301125	0.321331	0.0937116	0.925338	0.96287	42.981	42.026	42.4418	33.0494	53.4518	45.2924	46.3695	34.4163
AHCY	5670.76	-0.42931	0.0925432	-4.63902	3.5e-06	5.98e-05	4833.55	6507.98	4855.34	4530.37	5114.92	6217.21	7016.91	6289.81
AHCYL1	8120.99	0.0591385	0.0719888	0.821496	0.411364	0.603818	8287.35	7954.63	8153.07	8323.22	8385.76	8021.17	7828.38	8014.34
AHCYL2	835.423	0.0305525	0.106015	0.288189	0.773202	0.878863	844.196	826.65	828.676	906.248	797.665	781.017	836.666	862.268
AHDC1	195.496	-0.828628	0.193728	-4.27729	1.89e-05	0.000244086	140.844	250.147	126.264	151.331	144.937	193.321	300.394	256.727
AHI1	721.536	0.125081	0.105412	1.1866	0.235387	0.419551	752.825	690.247	793.662	740.132	724.683	718.05	653.205	699.488
AHNAK	44178	-0.373647	0.106667	-3.50293	0.000460172	0.00349088	38488.3	49867.8	33723.2	43990.4	37751.3	49018.5	50901.6	49683.2
AHNAK2	1166.57	-0.538639	0.151824	-3.54779	0.000388484	0.00304528	950.973	1382.17	745.914	1074.97	1032.03	1280.34	1593.7	1272.47
AHR	363.555	0.290183	0.132993	2.18194	0.0291136	0.0928633	399.98	327.129	394.709	387.895	417.335	353.501	289.305	338.582
AHRR	63.817	-0.508672	0.269516	-1.88735	0.0591126	0.157698	52.6517	74.9824	49.8691	55.6621	52.4239	64.0721	95.763	65.1119
AHSA1	5491.61	0.175943	0.0915056	1.92276	0.0545105	0.14864	5826.69	5156.52	6145.57	5404.44	5930.06	4861.75	5156.08	5451.73
AHSA2	1679.53	0.00649396	0.0871385	0.0745247	0.940593	0.971385	1683.18	1675.88	1723.14	1717.7	1608.69	1674.71	1717.69	1635.24
AIDA	1752.15	0.520005	0.091432	5.68735	1.29e-08	4.26e-07	2064.36	1439.94	2147.55	2030.8	2014.72	1534.42	1391.08	1394.32
AIF1L	3759.15	-0.350212	0.0766481	-4.56909	4.9e-06	7.89e-05	3305.26	4213.05	3269.08	3248.4	3398.3	4163.58	4260.95	4214.6
AIFM1	1570.27	0.177727	0.0988678	1.79762	0.0722366	0.182339	1667.13	1473.41	1834.55	1566.37	1600.47	1494.65	1447.53	1478.04
AIFM2	439.417	0.0312706	0.124632	0.250904	0.801889	0.895837	444.196	434.639	419.113	431.381	482.094	424.202	466.719	412.995
AIFM3	34.3671	-1.19376	0.385322	-3.09808	0.00194779	0.0112931	20.9124	47.8219	13.7936	19.1338	29.8096	41.9783	61.4899	39.9973
AIG1	746.585	0.0946207	0.10824	0.874172	0.382024	0.577689	771.181	721.989	840.347	739.262	733.934	745.667	697.558	722.742
AIM1	1140.69	-0.0950888	0.0992201	-0.958363	0.33788	0.53478	1102.87	1178.52	1024.97	1132.38	1151.27	1228.42	1123.96	1183.18
AIM1L	62.4544	-0.604344	0.278283	-2.17168	0.0298795	0.094722	49.5654	75.3433	44.5639	54.7924	49.3401	55.2346	91.7309	79.0644
AIMP1	1753.88	0.296838	0.115826	2.56279	0.0103836	0.0424451	1933.75	1574.01	2194.24	1785.53	1821.47	1716.69	1456.61	1548.73
AIMP2	537.382	-0.29508	0.126648	-2.32993	0.0198101	0.0695626	482.661	592.104	432.906	500.089	514.987	532.462	616.916	626.935
AIP	901.516	-0.597223	0.154903	-3.85548	0.000115505	0.00110801	717.347	1085.69	545.377	785.357	821.307	982.071	1189.48	1085.51
AIPL1	2.33239	-0.0224622	1.20051	-0.0187106	0.985072	NA	2.32614	2.33865	3.18313	1.73944	2.05584	2.20938	2.01606	2.79051
AJAP1	11.31	2.52492	0.68357	3.69372	0.000220993	0.00190982	19.2671	3.35295	12.7325	23.4824	21.5863	3.31408	3.0241	3.72068
AJUBA	1178.66	-0.208253	0.0990229	-2.10308	0.0354585	0.107912	1093.51	1263.81	1138.5	1102.8	1039.23	1354.35	1228.79	1208.29
AK1	511.25	-0.487676	0.13331	-3.65821	0.000253986	0.00214129	425.727	596.773	389.403	431.381	456.396	521.415	664.293	604.61
AK2	4303.07	0.396952	0.0820542	4.83767	1.31e-06	2.54e-05	4891.68	3714.47	5128.03	4624.3	4922.7	3675.31	3778.1	3689.98
AK3	2085.74	0.27637	0.108262	2.55279	0.0106865	0.0434202	2285.14	1886.34	2595.32	2105.59	2154.52	1960.83	1804.38	1893.83
AK4	4635.95	0.162325	0.0807176	2.01103	0.0443227	0.127608	4896.62	4375.28	5099.38	4667.79	4922.7	4496.1	4342.6	4287.15
AK6	586.016	0.295028	0.152722	1.9318	0.0533843	0.146521	645.932	526.099	796.845	565.318	575.635	558.974	479.823	539.499
AK7	837.413	0.0856049	0.104996	0.815312	0.414894	0.607048	862.56	812.267	931.597	813.188	842.893	809.739	785.257	841.804
AK8	50.9917	0.455119	0.284885	1.59755	0.110143	0.245834	58.859	43.1245	56.2354	61.7501	58.5914	47.5018	48.3855	33.4861
AK9	206.178	0.222667	0.16987	1.31081	0.189922	0.361824	222	190.356	235.552	210.472	219.975	222.043	159.269	189.755
AKAP1	2896.74	0.00326861	0.104042	0.0314161	0.974938	0.987103	2899.83	2893.65	2525.29	3054.46	3119.73	2837.95	2886	2957.01
AKAP10	1226.17	0.154295	0.0952936	1.61916	0.105414	0.237948	1291.81	1160.53	1376.18	1275.01	1224.25	1166.55	1130	1185.04
AKAP11	2810.87	0.0299221	0.101505	0.294786	0.768157	0.876097	2839.4	2782.34	2729.01	3097.07	2692.12	3030.17	2649.11	2667.73
AKAP12	277.145	0.0239236	0.145772	0.164117	0.869639	0.934563	279.401	274.89	275.872	299.184	263.147	248.556	305.434	270.679
AKAP13	1815.26	-0.126493	0.0873406	-1.44827	0.14754	0.303027	1735.32	1895.2	1701.92	1809.02	1695.04	1957.51	1902.16	1825.92
AKAP3	5.4896	2.46883	0.953496	2.58924	0.00961872	0.0401755	9.28662	1.69259	8.48836	12.1761	7.19543	2.20938	1.00803	1.86034
AKAP5	162.127	0.836981	0.184525	4.53586	5.74e-06	8.97e-05	207.693	116.56	213.27	193.948	215.863	139.191	111.892	98.598
AKAP6	23.0266	0.0154889	0.463335	0.0334292	0.973332	0.986425	23.0273	23.026	16.9767	35.6585	16.4467	22.0938	30.241	16.7431
AKAP7	141.588	1.61046	0.1938	8.30989	9.58e-17	6.58e-15	213.398	69.7784	227.064	209.602	203.528	71.805	58.4658	79.0644
AKAP8	999.894	0.013261	0.0958735	0.138317	0.88999	0.944921	1004.52	995.272	1048.31	1012.35	952.881	979.862	1018.11	987.841
AKAP8L	1844.13	0.0859814	0.103129	0.833727	0.404435	0.597661	1899.27	1788.99	1834.55	1942.08	1921.18	1586.34	1932.4	1848.25
AKAP9	4431.4	0.165369	0.0904222	1.82886	0.0674209	0.173769	4684.55	4178.26	4483.98	5093.08	4476.59	4341.44	4075.47	4117.86
AKIP1	254.549	-0.025019	0.152564	-0.16399	0.869739	0.934563	252.347	256.751	282.238	243.522	231.282	280.592	233.863	255.797
AKIRIN1	1609.31	0.240606	0.0915713	2.62753	0.0086008	0.0368155	1743.1	1475.53	1663.72	1742.05	1823.53	1526.68	1404.19	1495.71
AKIRIN2	577.647	0.162541	0.120795	1.34559	0.178433	0.346226	610.419	544.875	684.374	560.969	585.914	552.346	524.177	558.102
AKNA	190.959	-0.158297	0.190449	-0.831178	0.405873	0.598988	180.377	201.541	133.692	195.687	211.751	194.426	204.63	205.568
AKNAD1	3.08469	-0.408654	1.29874	-0.314654	0.753025	NA	2.63565	3.53374	0	1.73944	6.16751	7.73284	1.00803	1.86034
AKR1A1	942.002	-0.138465	0.104621	-1.3235	0.185671	0.356521	896.959	987.045	922.048	905.378	863.452	911.371	1067.51	982.26
AKR1C1	27.4079	0.160729	0.398458	0.403377	0.686671	0.821572	28.9612	25.8546	35.0145	20.0036	31.8655	33.1408	21.1687	23.2542
AKR1C2	32.3818	-0.282989	0.366695	-0.771727	0.440276	0.629586	29.1343	35.6293	33.9534	33.9191	19.5305	43.083	31.249	32.5559
AKR1C3	2.06988	1.07048	1.36679	0.783208	0.433505	NA	2.78944	1.35031	2.12209	5.21832	1.02792	1.10469	2.01606	0.93017
AKR1C6P	2.28491	0.342265	1.23189	0.277838	0.781137	NA	2.54123	2.0286	1.06104	3.47888	3.08376	2.20938	2.01606	1.86034
AKR1E2	141.169	0.0301557	0.173929	0.17338	0.862353	0.931831	142.567	139.772	134.753	146.983	145.964	144.715	135.076	139.525
AKR7A2	1536.48	-0.333823	0.110046	-3.03349	0.00241739	0.013453	1359.58	1713.37	1260.52	1363.72	1454.51	1553.2	1893.08	1693.84
AKR7A2P1	4.48873	-0.145338	0.948263	-0.153268	0.878187	NA	4.26794	4.70953	7.42731	4.3486	1.02792	5.52346	3.0241	5.58102
AKR7A3	27.6772	-0.75587	0.376728	-2.00641	0.0448126	0.128755	20.5832	34.7711	20.1599	20.0036	21.5863	33.1408	42.3373	28.8353
AKR7L	30.7654	-0.141881	0.405259	-0.350099	0.726264	0.848183	29.4228	32.108	41.3807	19.1338	27.7538	24.3032	29.2329	42.7878
AKT1	10561.5	-0.664943	0.160239	-4.1497	3.33e-05	0.000391451	8169.48	12953.5	5940.79	9039.87	9527.78	12023.5	14711.2	12125.7
AKT1S1	1057.1	-0.678569	0.144765	-4.68739	2.77e-06	4.9e-05	812.951	1301.25	665.275	834.061	939.518	1138.94	1461.65	1303.17
AKT2	3281.62	-0.469499	0.163292	-2.87521	0.00403758	0.0200151	2752.09	3811.14	2003.25	3033.58	3219.44	3455.48	4357.72	3620.22
AKT3	4.62841	0.336678	0.926742	0.363292	0.716387	NA	5.13519	4.12163	2.12209	6.08804	7.19543	6.62815	2.01606	3.72068
AKTIP	671.176	0.226688	0.109504	2.07013	0.0384402	0.114698	723.811	618.541	758.647	720.998	691.789	644.035	572.562	639.027
ALAD	1130.12	-0.177415	0.0899671	-1.972	0.0486101	0.136582	1060.55	1199.68	1038.76	1092.37	1050.53	1200.8	1195.53	1202.71
ALAS1	1363.85	0.156539	0.0999705	1.56585	0.117384	0.257661	1438.1	1289.59	1382.54	1383.72	1548.05	1206.32	1316.49	1345.96
ALCAM	1139.07	-0.0347237	0.0927891	-0.374221	0.70824	0.835621	1125.22	1152.91	1145.93	1134.98	1094.73	1203.01	1108.84	1146.9
ALDH16A1	439.256	-0.791635	0.196995	-4.01855	5.86e-05	0.000631609	321.595	556.918	270.566	342.67	351.548	447.4	748.968	474.387
ALDH18A1	3876.63	-0.00100095	0.0775558	-0.0129061	0.989703	0.993798	3875.57	3877.69	3989.53	3810.24	3826.94	3787.99	3890	3955.08
ALDH1A3	52.6779	-0.228541	0.319632	-0.715012	0.474602	0.659117	48.609	56.7469	61.5406	45.2254	39.0609	57.444	39.3132	73.4834
ALDH1B1	860.46	-0.149983	0.119619	-1.25384	0.209901	0.387624	815.879	905.04	781.99	822.755	842.893	798.692	1027.18	889.243
ALDH1L2	148.414	0.0470552	0.172055	0.273489	0.784477	0.885861	150.795	146.033	158.096	156.55	137.741	145.819	147.173	145.107
ALDH2	29.3689	-0.431089	0.396083	-1.08838	0.276428	0.466416	25.1438	33.5939	32.8924	14.7852	27.7538	35.3501	28.2249	37.2068
ALDH3A2	2957.96	0.159867	0.082228	1.9442	0.0518718	0.143537	3121.85	2794.07	3248.92	3065.76	3050.86	2823.59	2696.49	2862.13
ALDH3B1	39.6573	-0.309788	0.322029	-0.961989	0.336055	0.533324	35.409	43.9056	26.5261	36.5282	43.1726	39.7689	46.3695	45.5783
ALDH3B2	1424.11	-0.485729	0.106342	-4.56761	4.93e-06	7.93e-05	1186.45	1661.76	1081.2	1227.17	1250.98	1574.19	1808.41	1602.68
ALDH4A1	828.244	-0.779682	0.155266	-5.0216	5.12e-07	1.13e-05	609.697	1046.79	485.959	623.589	719.543	910.266	1186.45	1043.65
ALDH5A1	1442.13	0.0381763	0.0869934	0.438842	0.660776	0.80407	1461.35	1422.9	1511.99	1446.34	1425.72	1399.64	1438.46	1430.6
ALDH6A1	1601.91	-0.23734	0.0886674	-2.67675	0.00743411	0.0327612	1470.36	1733.46	1503.5	1482.87	1424.7	1792.92	1653.17	1754.3
ALDH7A1	2801.52	0.0841834	0.0987948	0.852104	0.394156	0.588354	2883.64	2719.41	3200.11	2708.31	2742.49	2698.76	2628.95	2830.51
ALDH8A1	2.75086	-0.157281	1.23489	-0.127364	0.898652	NA	2.62709	2.87464	4.24418	2.60916	1.02792	1.10469	1.00803	6.51119
ALDH9A1	2276.49	0.137512	0.0961948	1.42951	0.152857	0.311187	2384.93	2168.04	2552.87	2289.1	2312.82	2314.33	2027.15	2162.65
ALDOA	53718.6	-0.436913	0.160998	-2.71378	0.00665197	0.0299262	45645.8	61791.4	33409.1	47946.8	55581.6	57460.6	70066.3	57847.3
ALDOC	2909.71	0.100602	0.0898714	1.1194	0.262971	0.451751	3011.37	2808.04	2930.61	2979.66	3123.85	2605.97	2973.69	2844.46
ALG1	422.564	-0.283367	0.144816	-1.95674	0.0503786	0.140306	381.075	464.054	325.741	416.596	400.888	412.05	514.096	466.015
ALG10	653.942	0.10249	0.102005	1.00475	0.315015	0.509998	677.282	630.602	691.801	668.815	671.231	615.313	642.116	634.376
ALG10B	783.57	0.0697297	0.11197	0.622751	0.533448	0.707118	802.084	765.055	793.662	837.54	775.051	849.508	724.775	720.882
ALG11	177.252	0.137513	0.17267	0.796393	0.425804	0.616948	185.512	168.992	181.439	209.602	165.495	178.96	152.213	175.802
ALG12	377.073	-0.732514	0.168053	-4.35883	1.31e-05	0.000179132	283.164	470.981	219.636	312.229	317.627	420.888	536.273	455.783
ALG13	703.204	0.144488	0.108703	1.3292	0.183783	0.354222	738.559	667.85	797.906	699.255	718.515	688.223	639.092	676.234
ALG14	153.87	0.0425068	0.174674	0.243349	0.807735	0.898817	156.331	151.409	170.828	140.895	157.272	141.401	160.277	152.548
ALG1L	148.654	-0.59836	0.18902	-3.16559	0.00154767	0.00941647	118.449	178.86	129.447	97.4086	128.49	182.274	191.526	162.78
ALG1L2	6.44398	-0.147507	0.854533	-0.172617	0.862952	0.93189	6.09077	6.79718	5.30522	7.82748	5.13959	4.41877	14.1124	1.86034
ALG1L9P	61.4577	-0.276751	0.262222	-1.05541	0.291239	0.483561	55.4232	67.4922	47.747	66.0987	52.4239	74.0144	61.4899	66.9722
ALG2	916.599	0.160939	0.106264	1.51451	0.129896	0.276788	967.974	865.225	1041.95	901.899	960.076	831.833	918.317	845.525
ALG3	1081.95	-0.276526	0.112712	-2.45338	0.0141521	0.0540358	978.449	1185.45	858.385	1014.09	1062.87	1130.1	1244.92	1181.32
ALG5	840.59	0.49956	0.126414	3.95177	7.76e-05	0.000792126	984.889	696.292	1150.17	873.199	931.295	716.945	697.558	674.373
ALG6	520.565	0.177578	0.12795	1.38787	0.165178	0.32822	552.825	488.306	615.406	493.131	549.937	508.158	452.606	504.152
ALG8	1652.13	0.182381	0.0956701	1.90635	0.056605	0.153087	1756.62	1547.64	1863.19	1621.16	1785.5	1584.13	1570.51	1488.27
ALG9	630.788	0.145398	0.113453	1.28157	0.199994	0.375346	662.867	598.709	658.909	618.371	711.32	584.382	574.578	637.166
ALKBH1	632.943	0.319603	0.10756	2.9714	0.00296443	0.0157788	702.675	563.212	738.487	693.167	676.371	589.906	557.442	542.289
ALKBH2	1043.48	-0.0464091	0.106209	-0.43696	0.662141	0.805099	1026.67	1060.29	928.414	1067.15	1084.45	1003.06	1075.57	1102.25
ALKBH3	297.217	0.115934	0.129842	0.892885	0.371919	0.567566	309.243	285.192	311.947	299.184	316.599	282.801	286.281	286.492
ALKBH3-AS1	7.5883	-0.298596	0.79814	-0.374115	0.708319	0.83565	6.7454	8.43121	7.42731	8.6972	4.11168	14.361	9.07229	1.86034
ALKBH4	357.71	-0.360558	0.137201	-2.62797	0.00858973	0.0367783	313.096	402.324	289.665	339.191	310.432	368.967	444.542	393.462
ALKBH5	2538.38	-0.0297194	0.122465	-0.242677	0.808255	0.898956	2512.01	2564.75	2063.73	2669.17	2803.13	2493.29	2678.34	2522.62
ALKBH6	500.912	-0.218967	0.127404	-1.71868	0.0856727	0.205649	463.02	538.804	409.563	469.649	509.848	503.74	544.337	568.334
ALKBH7	140.915	-0.878033	0.205131	-4.28036	1.87e-05	0.000241344	99.1436	182.686	82.7615	113.933	100.736	160.18	216.727	171.151
ALKBH8	276.327	0.048571	0.150481	0.322772	0.746868	0.862573	280.811	271.843	302.398	286.138	253.896	307.104	247.976	260.448
ALMS1	1733.49	-0.0106326	0.109643	-0.0969747	0.922747	0.961677	1726.52	1740.45	1560.8	1963.83	1654.95	1784.08	1749.94	1687.33
ALMS1-IT1	32.8328	0.555556	0.344829	1.61111	0.107156	0.24076	39.0554	26.6102	35.0145	40.0071	42.1447	29.8267	21.1687	28.8353
ALMS1P	19.7071	3.60496	0.622854	5.78781	7.13e-09	2.43e-07	36.4877	2.92655	33.9534	42.6163	32.8934	1.10469	3.0241	4.65085
ALOX12	99.8109	-0.452501	0.234025	-1.93356	0.0531677	0.146103	84.2936	115.328	68.9679	85.2325	98.6802	96.1082	140.116	109.76
ALOX12-AS1	29.9426	-0.919386	0.378287	-2.43039	0.0150825	0.0566948	20.755	39.1303	26.5261	18.2641	17.4746	45.2924	30.241	41.8576
ALOX12B	25.0967	-0.215669	0.405483	-0.531881	0.594808	0.75462	23.1372	27.0563	14.8546	27.831	26.7259	30.9314	24.1928	26.0448
ALOX12P2	513.937	-0.245911	0.1346	-1.82698	0.0677026	0.174264	470.213	557.662	462.616	507.047	440.977	483.855	631.028	558.102
ALOX15	621.579	-0.461285	0.115128	-4.00669	6.16e-05	0.000658647	522.819	720.34	470.043	539.226	559.188	727.992	741.911	691.116
ALOX15B	3.46251	-0.180499	1.08365	-0.166567	0.867711	NA	3.24859	3.67643	3.18313	3.47888	3.08376	1.10469	8.06426	1.86034
ALOX15P1	15.1713	-0.19629	0.511778	-0.383544	0.701316	0.831613	14.0681	16.2744	9.5494	18.2641	14.3909	16.5704	20.1606	12.0922
ALOX5	4.36666	-0.0759394	0.922898	-0.0822836	0.934421	NA	4.22378	4.50955	3.18313	4.3486	5.13959	6.62815	5.04016	1.86034
ALOXE3	150.918	0.195547	0.187093	1.04519	0.295937	0.489319	160.99	140.846	134.753	165.247	182.97	146.924	148.181	127.433
ALPK1	293.512	0.343032	0.141599	2.42257	0.0154113	0.0576004	327.999	259.025	316.191	363.543	304.264	271.754	243.944	261.378
ALPK3	115.759	-0.395838	0.206236	-1.91935	0.0549406	0.149629	100.107	131.411	101.86	84.3628	114.099	142.505	115.924	135.805
ALS2	1193.84	0.136433	0.0976937	1.39653	0.162554	0.324836	1250.55	1137.13	1321	1154.99	1275.65	1154.4	1112.87	1144.11
ALS2CL	146.078	-0.75581	0.202073	-3.74028	0.000183814	0.00163776	108.568	183.589	81.7005	116.542	127.462	169.018	197.574	184.174
ALS2CR11	3.37049	-2.11453	1.23751	-1.7087	0.0875057	NA	1.2234	5.51758	1.06104	2.60916	0	6.62815	8.06426	1.86034
ALS2CR12	8.77418	-0.451695	0.653067	-0.691651	0.489157	0.66986	7.3669	10.1815	6.36627	9.56692	6.16751	13.2563	7.05622	10.2319
ALX3	134.296	-0.415872	0.195073	-2.13188	0.033017	0.102287	115.053	153.539	94.433	119.152	131.574	148.029	145.157	167.431
ALYREF	1663.62	-0.375014	0.10758	-3.48591	0.000490461	0.00367396	1448.62	1878.62	1309.33	1435.04	1601.5	1790.71	2009.01	1836.16
AMACR	17.5773	-0.425653	0.481384	-0.884227	0.376574	0.571954	14.9072	20.2475	11.6715	21.743	11.3071	19.8845	23.1847	17.6732
AMBP	31.9406	-0.788136	0.353831	-2.22744	0.025918	0.0850294	23.445	40.4363	19.0988	23.4824	27.7538	34.2455	43.3454	43.718
AMBRA1	938.549	0.0362352	0.121432	0.298399	0.765398	0.87414	950.183	926.916	811.699	1008.88	1029.97	877.126	981.823	921.798
AMD1	3828.29	0.090362	0.0998416	0.905054	0.365437	0.561469	3948.32	3708.27	4400.15	3765.89	3678.92	3856.48	3528.11	3740.21
AMDHD1	11.6879	0.133024	0.683041	0.194753	0.845586	0.921589	12.1415	11.2343	4.24418	20.8733	11.3071	16.5704	5.04016	12.0922
AMDHD2	257.207	-1.45862	0.274236	-5.31884	1.04e-07	2.86e-06	136.964	377.45	82.7615	173.944	154.188	346.873	523.169	262.308
AMER1	755.669	0.239785	0.116571	2.05698	0.0396877	0.117377	817.972	693.365	729.999	914.945	808.972	689.328	700.582	690.186
AMFR	1974.11	-0.200436	0.0861081	-2.32773	0.0199264	0.0697673	1837.02	2111.2	1768.76	1906.43	1835.86	2116.59	2042.27	2174.74
AMH	114.233	-1.02281	0.26585	-3.84731	0.000119421	0.00114134	75.0829	153.383	55.1743	99.1481	70.9264	142.505	198.582	119.062
AMIGO1	326.112	0.0116279	0.147492	0.0788378	0.937162	0.970036	327.222	325.002	276.933	369.631	335.102	307.104	337.691	330.21
AMIGO2	579.973	0.715041	0.107855	6.62964	3.37e-11	1.57e-09	720.843	439.104	734.243	714.91	713.376	450.714	417.325	449.272
AMIGO3	74.0349	-1.12308	0.288976	-3.88642	0.000101734	0.00100001	46.6112	101.459	39.2587	46.0952	54.4797	75.1191	138.1	91.1567
AMMECR1	417.116	0.20905	0.122808	1.70224	0.0887099	0.210852	447.113	387.119	468.982	453.994	418.363	412.05	380.028	369.277
AMMECR1L	1681.27	0.0970395	0.0830822	1.16799	0.242809	0.428596	1737.69	1624.86	1704.04	1753.36	1755.69	1638.26	1616.88	1619.43
AMN	2.00591	-1.63458	1.46147	-1.11845	0.263377	NA	0.975186	3.03663	0	0.86972	2.05584	2.20938	5.04016	1.86034
AMN1	217.795	0.125916	0.199562	0.63096	0.528067	0.702445	227.306	208.284	264.2	184.381	233.338	260.707	174.39	189.755
AMOT	27.5136	0.185835	0.385676	0.481842	0.629918	0.781469	29.3146	25.7126	36.0755	31.3099	20.5584	22.0938	26.2088	28.8353
AMOTL1	2060.34	-0.293861	0.0979975	-2.99866	0.00271169	0.0147419	1850.96	2269.71	1682.82	1961.22	1908.85	2179.56	2386.01	2243.57
AMOTL2	2572.23	-0.160612	0.099226	-1.61865	0.105522	0.238019	2428.92	2715.54	2178.32	2544.8	2563.63	2655.68	2855.75	2635.17
AMPD1	31.7126	0.121417	0.350886	0.346029	0.729321	0.850433	32.9578	30.4674	26.5261	37.398	34.9492	35.3501	27.2169	28.8353
AMPD2	1891.55	-0.631352	0.162104	-3.89473	9.83e-05	0.000971272	1483.91	2299.19	1093.94	1618.55	1739.24	2125.43	2629.96	2142.18
AMPD3	131.702	0.507303	0.191848	2.6443	0.00818589	0.0353526	154.625	108.78	141.119	158.289	164.467	112.679	92.7389	120.922
AMPH	7.38407	1.56006	0.755945	2.06372	0.0390444	0.115849	10.9888	3.77936	7.42731	12.1761	13.3629	5.52346	3.0241	2.79051
AMT	158.415	0.0810214	0.186558	0.434295	0.664074	0.806565	163.082	153.748	176.133	132.197	180.914	148.029	165.317	147.897
AMY2B	21.6107	0.187898	0.454443	0.41347	0.679263	0.816995	23.1101	20.1114	35.0145	14.7852	19.5305	18.7798	20.1606	21.3939
AMZ1	1000.54	-0.490319	0.141818	-3.45738	0.000545452	0.00403333	832.029	1169.05	700.29	864.502	931.295	1050.56	1360.84	1095.74
AMZ2	2811.12	0.0905817	0.103911	0.871722	0.38336	0.57871	2899.61	2722.62	3263.77	2664.82	2770.24	2828.01	2609.79	2730.05
AMZ2P1	340.798	0.135216	0.132962	1.01695	0.309176	0.503592	356.982	324.614	393.648	333.972	343.325	311.523	337.691	324.629
ANAPC1	3290.95	-0.0682928	0.0855399	-0.798374	0.424654	0.615698	3212.57	3369.33	3125.84	3418.87	3093.01	3478.68	3323.48	3305.82
ANAPC10	261.709	0.377536	0.161572	2.33664	0.0194581	0.068656	295.791	227.628	343.779	260.916	282.678	254.079	216.727	212.079
ANAPC11	1052.34	-0.877853	0.160363	-5.47415	4.4e-08	1.29e-06	741.425	1363.26	589.941	836.67	797.665	1196.38	1645.11	1248.29
ANAPC13	1674.41	0.349709	0.125997	2.77555	0.00551092	0.0256275	1876.56	1472.26	2225.01	1705.52	1699.15	1550.99	1371.93	1493.85
ANAPC15	198.013	-0.422254	0.169264	-2.49465	0.012608	0.049504	169.358	226.669	174.011	169.595	164.467	191.112	260.072	228.822
ANAPC16	2847.46	0.0301772	0.102688	0.293872	0.768856	0.876317	2877.46	2817.46	3224.52	2644.82	2763.05	2950.63	2754.95	2746.79
ANAPC2	649.843	-1.02852	0.207271	-4.96222	6.97e-07	1.47e-05	427.249	872.436	300.276	509.656	471.815	757.819	1133.03	726.463
ANAPC4	1396.03	0.243939	0.102766	2.37373	0.0176096	0.0634888	1513.93	1278.13	1660.54	1407.21	1474.04	1342.2	1231.81	1260.38
ANAPC5	5422.2	-0.134013	0.0768325	-1.74423	0.0811198	0.1975	5170.48	5673.92	5004.95	5130.48	5376.02	5728.93	5691.35	5601.48
ANAPC7	2753.77	0.124212	0.103228	1.20328	0.228866	0.411662	2872.52	2635.02	3236.19	2660.47	2720.9	2713.12	2537.22	2654.71
ANG	18.884	0.599232	0.469915	1.27519	0.202242	0.377502	22.6567	15.1112	24.404	26.0916	17.4746	20.9891	14.1124	10.2319
ANGEL1	2512.24	-0.0786798	0.0971212	-0.810119	0.417872	0.609853	2443.55	2580.94	2203.79	2516.97	2609.89	2539.69	2682.37	2520.76
ANGEL2	626.373	0.133326	0.112702	1.18299	0.236812	0.42125	655.125	597.621	674.824	635.765	654.784	649.559	591.715	551.591
ANGPT1	4.87068	-0.470911	0.923506	-0.509916	0.61011	NA	4.04349	5.69787	1.06104	6.95776	4.11168	6.62815	3.0241	7.44136
ANGPT2	5.59657	0.311525	0.823415	0.378333	0.705183	0.834049	6.21832	4.97483	7.42731	6.08804	5.13959	2.20938	8.06426	4.65085
ANGPT4	2.34247	-0.411211	1.23059	-0.334158	0.73826	NA	2.03623	2.64871	3.18313	0.86972	2.05584	2.20938	2.01606	3.72068
ANGPTL1	4.84872	-0.343585	0.948074	-0.362404	0.71705	NA	4.27651	5.42092	3.18313	3.47888	6.16751	3.31408	11.0884	1.86034
ANGPTL2	3.77685	0.0899346	1.03163	0.0871771	0.930531	NA	3.90322	3.65048	5.30522	4.3486	2.05584	1.10469	7.05622	2.79051
ANGPTL4	239.444	0.460105	0.200631	2.29329	0.0218315	0.0748171	277.201	201.686	203.721	283.529	344.353	196.635	229.831	178.593
ANGPTL6	10.736	0.243369	0.635015	0.383249	0.701535	0.831636	11.6589	9.81324	8.48836	6.95776	19.5305	12.1516	7.05622	10.2319
ANGPTL7	2.78846	1.23311	1.2715	0.969807	0.332143	NA	3.92283	1.6541	2.12209	3.47888	6.16751	0	4.03213	0.93017
ANK1	18.8148	-0.520161	0.454771	-1.14379	0.252712	0.439971	15.5093	22.1203	13.7936	12.1761	20.5584	22.0938	19.1526	25.1146
ANK2	17.0688	-0.932042	0.527434	-1.76713	0.0772071	0.191091	11.6365	22.5011	6.36627	18.2641	10.2792	25.4079	15.1205	26.9749
ANK3	1539.5	-0.0377616	0.0979724	-0.38543	0.699919	0.830728	1519.08	1559.91	1553.37	1620.29	1383.58	1589.65	1518.1	1571.99
ANKAR	63.6713	0.0911426	0.27104	0.33627	0.736667	0.855102	65.4834	61.8593	64.7237	78.2748	53.4518	74.0144	59.4739	52.0895
ANKDD1A	110.922	0.101801	0.199638	0.509928	0.610102	0.767063	114.812	107.032	109.288	108.715	126.434	109.365	115.924	95.8075
ANKEF1	480.763	0.15765	0.113315	1.39125	0.164149	0.326802	506.786	454.74	487.02	529.659	503.68	468.389	446.558	449.272
ANKFY1	4279.78	0.862216	0.104542	8.24753	1.62e-16	1.1e-14	5521.74	3037.82	4799.11	5908.01	5858.11	2949.53	3151.11	3012.82
ANKH	674.084	-0.107368	0.110048	-0.975643	0.329242	0.526441	648.969	699.199	622.833	677.512	646.561	693.747	653.205	750.647
ANKHD1	285.514	0.540468	0.165735	3.26104	0.00111005	0.00717881	338.419	232.609	410.624	309.62	295.013	252.974	219.751	225.101
ANKHD1-EIF4EBP3	4.44013	0.0783922	0.895285	0.0875611	0.930225	NA	4.57746	4.30281	4.24418	4.3486	5.13959	2.20938	6.04819	4.65085
ANKIB1	4888.35	0.417706	0.0840607	4.9691	6.73e-07	1.43e-05	5590.66	4186.05	5532.29	5705.36	5534.32	4485.05	4036.16	4036.94
ANKK1	3.19112	0.385299	1.0701	0.360058	0.718804	NA	3.59123	2.79101	3.18313	3.47888	4.11168	4.41877	3.0241	0.93017
ANKLE1	11.0008	0.0155084	0.588582	0.0263487	0.978979	0.98869	11.0967	10.9049	12.7325	11.3064	9.25127	8.83754	8.06426	15.8129
ANKLE2	4108.83	0.0174167	0.0768276	0.226698	0.820659	0.907256	4133.45	4084.21	4023.48	4145.95	4230.91	4170.21	4060.35	4022.06
ANKMY1	332.817	-0.663107	0.159773	-4.15032	3.32e-05	0.000390981	257.317	408.317	202.66	283.529	285.761	430.83	418.333	375.789
ANKMY2	508.843	0.448161	0.146332	3.06264	0.00219397	0.0124872	587.093	430.592	651.482	600.976	508.82	489.379	368.94	433.459
ANKRA2	356.472	0.27037	0.151097	1.78938	0.073553	0.184757	389.782	323.162	420.174	351.367	397.805	373.386	275.193	320.909
ANKRD10	1113.71	0.24539	0.0945148	2.59631	0.00942316	0.0395035	1208.57	1018.86	1245.67	1150.64	1229.39	988.699	1013.07	1054.81
ANKRD11	2722.34	-0.337569	0.130614	-2.58449	0.00975243	0.0405811	2404.93	3039.76	2013.86	2737.01	2463.92	2799.29	3425.29	2894.69
ANKRD12	1707.73	0.181733	0.0988816	1.83788	0.06608	0.171338	1814.72	1600.74	1845.16	1902.95	1696.07	1729.95	1528.18	1544.08
ANKRD13A	1281.94	0.00795943	0.0879681	0.0904808	0.927905	0.964119	1285.39	1278.49	1273.25	1278.49	1304.43	1314.58	1253.99	1266.89
ANKRD13B	414.651	-0.482785	0.167452	-2.88312	0.00393753	0.0196446	345.706	483.595	272.689	374.849	389.581	451.819	565.506	433.459
ANKRD13C	566.057	0.0784109	0.13141	0.596689	0.550715	0.721043	581.328	550.786	641.932	553.142	548.909	598.743	574.578	479.038
ANKRD13D	704.94	-0.78337	0.186399	-4.20265	2.64e-05	0.000322658	517.857	892.023	368.183	592.279	593.109	803.111	1078.59	794.365
ANKRD16	246.592	-0.28591	0.150474	-1.90006	0.0574249	0.154678	222.138	271.046	205.843	220.039	240.533	276.173	292.329	244.635
ANKRD17	3633.29	0.086808	0.09356	0.927833	0.353494	0.550542	3742.04	3524.54	3495.08	4079.86	3651.17	3662.05	3389	3522.55
ANKRD18A	268.742	0.0392063	0.145253	0.269918	0.787224	0.887009	272.636	264.847	304.52	246.131	267.259	264.021	257.048	273.47
ANKRD18B	267.161	-0.176922	0.144561	-1.22385	0.221007	0.401669	250.761	283.562	271.627	245.261	235.393	309.314	265.112	276.26
ANKRD19P	11.5216	0.316158	0.636132	0.497001	0.619188	0.77416	12.7972	10.2459	19.0988	6.95776	12.335	15.4657	5.04016	10.2319
ANKRD2	3.28963	-0.971941	1.14226	-0.850891	0.39483	NA	2.19859	4.38067	1.06104	3.47888	2.05584	2.20938	9.07229	1.86034
ANKRD20A11P	16.4863	-0.0922244	0.536126	-0.17202	0.863422	0.932101	15.8517	17.121	13.7936	23.4824	10.2792	19.8845	22.1767	9.3017
ANKRD20A12P	88.0015	-0.00327165	0.223657	-0.014628	0.988329	0.993072	87.8044	88.1987	92.3109	99.1481	71.9543	88.3754	89.7148	86.5058
ANKRD20A19P	50.7246	-0.641503	0.312396	-2.05349	0.0400247	0.118126	39.5494	61.8999	31.8313	42.6163	44.2005	58.5487	80.6426	46.5085
ANKRD20A4	4.75112	-0.259734	0.935273	-0.27771	0.781235	NA	4.32068	5.18157	7.42731	3.47888	2.05584	6.62815	7.05622	1.86034
ANKRD20A5P	221.484	-0.0951145	0.158643	-0.599551	0.548805	0.719426	214.116	228.852	230.247	209.602	202.5	237.509	249.992	199.056
ANKRD20A8P	3.27017	-1.12449	1.14989	-0.977914	0.328117	NA	2.08896	4.45138	3.18313	0	3.08376	5.52346	5.04016	2.79051
ANKRD20A9P	668.418	0.142018	0.111862	1.26958	0.204236	0.38033	701.077	635.759	706.656	747.959	648.617	658.396	597.763	651.119
ANKRD22	3.50394	0.130005	1.22797	0.10587	0.915686	NA	3.67461	3.33326	1.06104	1.73944	8.22335	4.41877	0	5.58102
ANKRD23	171.121	-0.805431	0.205139	-3.92626	8.63e-05	0.000867476	124.396	217.846	100.799	135.676	136.713	202.159	268.136	183.243
ANKRD24	32.5533	-0.211978	0.355621	-0.596079	0.551122	0.721428	30.0518	35.0548	23.343	33.9191	32.8934	41.9783	35.2811	27.9051
ANKRD26	812.27	0.118897	0.107608	1.1049	0.269201	0.458345	845.287	779.252	817.005	920.164	798.693	806.425	786.265	745.066
ANKRD27	1873.59	-0.0275922	0.0851514	-0.324037	0.74591	0.861917	1855.42	1891.76	1810.14	1915.12	1841	1885.71	1951.55	1838.02
ANKRD28	3579.2	0.15533	0.0826309	1.8798	0.0601352	0.159712	3771.61	3386.8	3877.06	3685.87	3751.9	3568.16	3265.02	3327.22
ANKRD29	6.69137	0.0800247	0.756331	0.105806	0.915736	0.957842	6.85086	6.53188	7.42731	6.95776	6.16751	7.73284	9.07229	2.79051
ANKRD30A	630.989	0.0345755	0.124687	0.277298	0.781551	0.884466	638.037	623.941	605.857	719.258	588.998	673.862	612.883	585.077
ANKRD30B	60.3222	0.301164	0.27078	1.11221	0.266049	0.454974	66.6679	53.9765	72.151	71.317	56.5355	47.5018	48.3855	66.0421
ANKRD30BL	2.13632	1.7795	1.61853	1.09946	0.271568	NA	3.31652	0.956124	2.12209	7.82748	0	0	1.00803	1.86034
ANKRD31	45.235	0.330549	0.320962	1.02987	0.303071	0.497143	50.2667	40.2033	56.2354	56.5318	38.033	51.9205	34.2731	34.4163
ANKRD32	684.237	0.135511	0.117278	1.15547	0.247899	0.434762	716.06	652.414	733.182	765.353	649.645	700.375	604.819	652.049
ANKRD33B	12.0436	1.45331	0.590671	2.46043	0.013877	0.0532209	17.6135	6.47371	15.9157	17.3944	19.5305	6.62815	9.07229	3.72068
ANKRD34A	405.424	0.0757274	0.13843	0.547045	0.584348	0.747028	415.885	394.964	355.45	429.642	462.564	396.584	415.309	372.998
ANKRD34B	31.7916	0.0679963	0.397052	0.171253	0.864025	0.932517	32.5602	31.0231	21.2209	26.0916	50.368	33.1408	29.2329	30.6956
ANKRD35	3.42119	-0.164879	1.02039	-0.161583	0.871634	NA	3.23755	3.60483	2.12209	3.47888	4.11168	2.20938	3.0241	5.58102
ANKRD36	567.558	-0.191751	0.131141	-1.46217	0.143694	0.297607	529.533	605.583	525.217	601.846	461.536	637.407	564.498	614.842
ANKRD36B	269.269	-0.0424402	0.150708	-0.281604	0.778247	0.882272	265.08	273.458	267.383	296.574	231.282	287.22	255.032	278.121
ANKRD36BP1	135.515	-0.144926	0.186154	-0.778526	0.436259	0.626149	128.616	142.414	138.997	134.807	112.043	154.657	133.06	139.525
ANKRD36C	466.068	-0.328849	0.180105	-1.82588	0.067869	0.174577	412.681	519.454	328.924	540.096	369.023	525.833	566.514	466.015
ANKRD37	54.3759	-0.228064	0.281276	-0.81082	0.417469	0.609495	50.0246	58.7272	45.6249	53.0529	51.3959	55.2346	72.5783	48.3688
ANKRD39	189.62	-0.860612	0.18435	-4.66836	3.04e-06	5.32e-05	134.519	244.722	126.264	142.634	134.657	241.928	291.321	200.917
ANKRD40	2132.03	0.0341456	0.0833097	0.409863	0.681906	0.818309	2157.02	2107.04	2101.93	2201.26	2167.88	2174.03	2040.26	2106.84
ANKRD42	322.493	0.0814566	0.12803	0.636231	0.524626	0.699458	331.627	313.358	327.863	322.666	344.353	322.57	299.385	318.118
ANKRD44	153.005	0.0304021	0.16886	0.180043	0.857119	0.929318	154.621	151.388	155.974	160.898	146.992	146.924	148.181	159.059
ANKRD45	4.74353	4.66053	1.40809	3.30982	0.000933552	NA	9.177	0.310057	10.6104	8.6972	8.22335	0	0	0.93017
ANKRD46	550.747	0.239052	0.111639	2.1413	0.0322501	0.100472	596.465	505.029	637.688	562.709	588.998	503.74	509.056	502.292
ANKRD49	347.405	0.156549	0.140545	1.11388	0.265332	0.454449	366.296	328.515	414.869	336.582	347.437	355.711	314.506	315.328
ANKRD50	1699.05	-0.282096	0.0969091	-2.91094	0.00360344	0.0184012	1533.05	1865.06	1525.78	1650.73	1422.64	1939.84	1791.27	1864.06
ANKRD52	4756.3	-0.499102	0.110312	-4.52447	6.05e-06	9.37e-05	3941.34	5571.25	3338.05	4269.45	4216.52	5397.53	5669.17	5647.06
ANKRD53	3.45259	-0.236652	1.03855	-0.227869	0.819748	NA	3.13208	3.77309	2.12209	5.21832	2.05584	4.41877	5.04016	1.86034
ANKRD54	435.83	-0.164929	0.114621	-1.43891	0.150177	0.30706	410.904	460.756	401.075	412.247	419.391	458.447	471.759	452.063
ANKRD6	241.879	-0.109664	0.143296	-0.765297	0.444095	0.632483	232.679	251.079	226.003	241.782	230.254	247.451	237.896	267.889
ANKRD61	131.299	-0.207588	0.192806	-1.07666	0.28163	0.472165	121.612	140.987	109.288	143.504	112.043	149.133	137.092	136.735
ANKRD62	3.19548	-1.26859	1.15561	-1.09777	0.272305	NA	1.85595	4.535	1.06104	3.47888	1.02792	2.20938	3.0241	8.37153
ANKRD62P1-PARP4P3	2.52034	0.513683	1.27637	0.402458	0.687347	NA	2.94764	2.09304	2.12209	2.60916	4.11168	4.41877	0	1.86034
ANKRD65	2.72962	0.279605	1.43489	0.194862	0.845501	NA	2.97829	2.48095	0	1.73944	7.19543	4.41877	3.0241	0
ANKRD9	246.967	-0.192635	0.174379	-1.1047	0.269291	0.458398	230.329	263.605	195.232	258.307	237.449	236.404	313.498	240.914
ANKS1A	1104.85	-0.152557	0.122232	-1.24809	0.211997	0.39032	1046.24	1163.45	914.621	1126.29	1097.82	1092.54	1298.35	1099.46
ANKS1B	175.393	-0.040687	0.161574	-0.251817	0.801183	0.895389	172.878	177.909	160.218	182.641	175.774	170.123	179.43	184.174
ANKS3	306.128	-0.717726	0.177302	-4.04805	5.16e-05	0.000567847	231.405	380.85	184.622	255.698	253.896	315.942	441.518	385.09
ANKS4B	2.01865	0.0346675	1.46503	0.0236633	0.981121	NA	2.06688	1.97042	1.06104	0	5.13959	1.10469	2.01606	2.79051
ANKS6	936.943	-0.318629	0.116516	-2.73465	0.00624467	0.028415	833.799	1040.09	743.792	876.678	880.926	953.349	1126.98	1039.93
ANKZF1	2283.21	-0.00721291	0.104701	-0.0688904	0.945077	0.97316	2277.52	2288.89	2065.85	2242.14	2524.57	2201.65	2435.41	2229.62
ANLN	4039.53	0.0583801	0.0913124	0.639345	0.522599	0.697923	4121.27	3957.78	4463.82	4015.5	3884.51	4143.7	3828.51	3901.13
ANO1	72.037	0.0603072	0.25358	0.237823	0.812018	0.901204	73.6534	70.4205	84.8836	60.0107	76.066	66.2815	82.6586	62.3214
ANO10	648.104	-0.000114338	0.111949	-0.00102133	0.999185	0.999688	647.798	648.409	654.665	651.42	637.31	699.27	656.229	589.728
ANO2	19.5477	-0.23409	0.430601	-0.543635	0.586693	0.7487	17.9893	21.106	19.0988	17.3944	17.4746	20.9891	18.1446	24.1844
ANO3	2.91603	3.93044	1.5334	2.56323	0.0103704	NA	5.52199	0.310057	6.36627	6.08804	4.11168	0	0	0.93017
ANO4	24.5201	-0.410605	0.418366	-0.981451	0.326371	0.52336	21.0976	27.9426	26.5261	18.2641	18.5025	23.1985	38.3052	22.3241
ANO6	1725.66	0.167049	0.104443	1.59943	0.109726	0.245221	1824.99	1626.33	1652.05	1994.27	1828.67	1711.17	1537.25	1630.59
ANO7	23.2403	-0.533234	0.411322	-1.29639	0.194841	0.368616	19.0368	27.4437	15.9157	16.5247	24.6701	26.5126	24.1928	31.6258
ANO8	453.37	-0.705348	0.172973	-4.0778	4.55e-05	0.000512826	344.507	562.234	266.322	376.589	390.609	504.844	669.333	512.524
ANO9	210.976	-0.591841	0.190176	-3.11207	0.00185782	0.0108977	168.121	253.831	133.692	188.729	181.942	226.462	303.418	231.612
ANOS1	56.7205	0.255365	0.273544	0.933544	0.350539	0.548056	61.6724	51.7686	53.0522	60.0107	71.9543	54.1299	57.4578	43.718
ANP32A	4720.9	0.0911314	0.092168	0.988753	0.322784	0.519218	4870.46	4571.33	5259.6	4618.21	4733.57	4426.5	4428.28	4859.21
ANP32A-IT1	33.9795	-0.306387	0.3892	-0.787223	0.431151	0.62152	30.2233	37.7358	29.7093	43.486	17.4746	45.2924	36.2891	31.6258
ANP32B	11845.7	0.216383	0.118223	1.83029	0.0672069	0.173477	12732.7	10958.7	14625.4	11729.9	11842.7	11281.1	9706.34	11888.5
ANP32E	6157.32	0.190988	0.104409	1.82923	0.0673646	0.173653	6564.45	5750.2	7454.9	6249.81	5988.66	5974.17	5502.85	5773.57
ANPEP	7.35892	-0.0389636	0.74994	-0.0519557	0.958564	0.979194	7.26832	7.44952	9.5494	6.08804	6.16751	5.52346	13.1044	3.72068
ANTXR1	539.369	-0.238395	0.108111	-2.20508	0.0274482	0.0888104	494.835	583.903	493.386	501.828	489.289	597.638	562.482	591.588
ANXA1	17.4749	1.24323	0.505643	2.45872	0.0139433	0.0533565	24.6515	10.2982	28.6482	16.5247	28.7817	6.62815	13.1044	11.162
ANXA10	4.63227	5.6433	1.43503	3.93254	8.41e-05	NA	9.26454	0	6.36627	12.1761	9.25127	0	0	0
ANXA11	1930.08	-0.281569	0.101026	-2.7871	0.00531822	0.0249604	1742.46	2117.7	1753.91	1711.61	1761.85	1977.4	2362.83	2012.89
ANXA2	4274.03	0.347272	0.0991204	3.50354	0.00045912	0.0034846	4786.36	3761.7	5340.24	4363.38	4655.44	3787.99	3660.16	3836.95
ANXA2P2	28.03	0.839734	0.409971	2.04828	0.0405326	0.119194	35.9678	20.0923	37.1366	23.4824	47.2843	24.3032	20.1606	15.8129
ANXA2R	50.4799	0.610999	0.295129	2.07028	0.0384261	0.114695	60.9888	39.971	45.6249	64.3593	72.9822	38.6642	40.3213	40.9275
ANXA3	157.012	0.158863	0.198355	0.800903	0.423188	0.614664	165.874	148.15	196.293	134.807	166.523	154.657	127.012	162.78
ANXA4	1315.94	0.108388	0.092629	1.17013	0.24195	0.427516	1365.24	1266.64	1378.3	1324.58	1392.83	1330.05	1268.1	1201.78
ANXA5	5717.26	0.241224	0.10743	2.24539	0.0247428	0.0820058	6194.39	5240.12	7080.35	5614.91	5887.92	5469.33	4992.78	5258.25
ANXA6	8381.05	-0.170976	0.0860449	-1.98706	0.0469157	0.132847	7885.19	8876.91	7493.1	7812.69	8349.79	8377.98	9236.6	9016.14
ANXA7	3641.62	0.102996	0.0802003	1.28424	0.199059	0.374406	3771.8	3511.44	3913.13	3683.26	3719.01	3421.23	3625.89	3487.21
ANXA9	2607.78	-0.301754	0.0902698	-3.3428	0.000829369	0.00566577	2336.12	2879.44	2220.77	2285.62	2501.95	2813.65	3009.98	2814.69
AOC2	20.965	-0.136722	0.430901	-0.317294	0.751021	0.865014	19.9703	21.9597	16.9767	18.2641	24.6701	20.9891	27.2169	17.6732
AOC3	18.0771	-0.830865	0.496278	-1.67419	0.0940929	0.219677	13.1288	23.0255	18.0378	6.95776	14.3909	17.6751	27.2169	24.1844
AOX1	379.062	0.880543	0.148188	5.94207	2.81e-09	1.04e-07	491.517	266.606	511.424	486.173	476.954	260.707	223.783	315.328
AOX2P	4.93142	-0.285255	0.873389	-0.326607	0.743965	NA	4.39717	5.46567	2.12209	6.95776	4.11168	6.62815	6.04819	3.72068
AP1AR	1808.45	0.293225	0.114122	2.5694	0.0101876	0.0418311	1991.77	1625.14	2293.98	1840.33	1841	1708.96	1555.39	1611.05
AP1B1	2243.95	-0.670511	0.168188	-3.98667	6.7e-05	0.000706058	1731.46	2756.44	1222.32	1897.73	2074.34	2560.68	3061.39	2647.26
AP1G1	5389.26	0.0985513	0.0745845	1.32134	0.186389	0.357286	5573.14	5205.38	5634.15	5587.95	5497.31	5336.77	5094.59	5184.77
AP1G2	1894.34	-0.307153	0.117117	-2.62262	0.00872557	0.0371855	1693.23	2095.46	1443.02	1752.49	1884.18	2054.73	2231.78	1999.87
AP1M1	818.669	-0.229619	0.164782	-1.39347	0.163479	0.325979	753.319	884.019	560.232	855.804	843.921	876.021	991.903	784.133
AP1M2	3425.56	-0.29616	0.0968398	-3.05825	0.00222637	0.0126207	3075.24	3775.87	2812.83	3081.42	3331.49	3564.84	3932.33	3830.44
AP1S1	4653.85	-0.114626	0.0852887	-1.34397	0.178958	0.346984	4469.02	4838.67	4163.54	4563.42	4680.11	4693.84	4871.82	4950.36
AP1S2	192.443	0.0526517	0.164466	0.320137	0.748864	0.863473	196.149	188.737	213.27	192.208	182.97	165.704	199.59	200.917
AP1S3	335.717	0.0263708	0.13193	0.199886	0.84157	0.919277	338.533	332.901	320.436	371.37	323.794	341.35	321.562	335.791
AP2A1	1530.57	-0.686464	0.183153	-3.74803	0.000178229	0.00159533	1172.92	1888.22	849.897	1342.85	1326.02	1601.8	2346.7	1716.16
AP2A2	813.197	-0.405589	0.119809	-3.3853	0.000711009	0.00500026	699.59	926.805	647.237	722.737	728.794	839.566	1042.3	898.544
AP2B1	3798.01	-0.0146754	0.0811176	-0.180915	0.856435	0.928846	3778.25	3817.76	3639.38	3942.44	3752.93	3938.23	3759.96	3755.1
AP2M1	11146.4	-0.222144	0.105117	-2.1133	0.0345754	0.105889	10290	12002.8	9089.97	10288.8	11491.1	11340.8	12627.6	12040.1
AP2S1	2631.11	-0.0688119	0.0935404	-0.735639	0.461951	0.648234	2568.87	2693.35	2623.96	2426.52	2656.14	2486.66	2833.58	2759.81
AP3B1	2065.53	0.112714	0.0964562	1.16855	0.242583	0.428343	2146.05	1985.01	2278.06	2141.25	2018.83	2121.01	1864.86	1969.17
AP3B2	109.187	-0.236358	0.200986	-1.17599	0.2396	0.42462	100.437	117.937	108.227	91.3206	101.764	104.946	127.012	121.852
AP3D1	2185.71	-0.550532	0.140455	-3.91965	8.87e-05	0.00088685	1773.28	2598.14	1405.88	2019.49	1894.45	2441.37	2901.12	2451.93
AP3M1	2005.98	0.0605646	0.0955388	0.633927	0.526128	0.701008	2047.71	1964.26	1880.17	2157.77	2105.18	2044.79	1876.96	1971.03
AP3M2	910.681	0.340343	0.116834	2.91303	0.00357937	0.0183109	1017.58	803.785	1067.41	981.044	1004.28	884.858	699.574	826.921
AP3S1	1856.8	0.184045	0.11437	1.60921	0.107571	0.241424	1975.2	1738.4	2238.8	1838.59	1848.2	1873.56	1595.71	1745.93
AP3S2	9.98022	0.854609	0.623213	1.3713	0.170283	0.334685	12.8541	7.10635	16.9767	11.3064	10.2792	8.83754	5.04016	7.44136
AP4B1	2090.29	0.204638	0.0893037	2.29149	0.0219353	0.0751066	2238.55	1942.03	2383.11	2136.9	2195.63	1969.67	1877.96	1978.47
AP4B1-AS1	207.117	-0.217695	0.154717	-1.40705	0.159413	0.32079	191.472	222.763	199.476	187.859	187.081	244.137	204.63	219.52
AP4E1	3732.44	0.108347	0.0793453	1.36551	0.172092	0.336958	3872.24	3592.63	3920.56	3960.7	3735.46	3700.72	3558.35	3518.83
AP4M1	633.157	-0.333286	0.129187	-2.57987	0.00988372	0.0409736	560.246	706.067	495.508	581.843	603.388	650.664	791.305	676.234
AP4S1	211.25	-0.216076	0.154814	-1.39571	0.162801	0.32512	195.356	227.144	207.965	204.384	173.718	237.509	219.751	224.171
AP5B1	1192.03	0.278204	0.121943	2.28143	0.022523	0.076394	1306.61	1077.46	1149.11	1325.45	1445.25	993.118	1196.53	1042.72
AP5M1	1181.96	0.104498	0.0922248	1.13308	0.257182	0.444958	1224.52	1139.41	1234	1235.87	1203.69	1199.7	1108.84	1109.69
AP5S1	470.029	-0.380104	0.161672	-2.35108	0.0187189	0.0666368	408.342	531.715	344.84	416.596	463.591	500.426	637.076	457.644
AP5Z1	583.231	-0.72084	0.176852	-4.07595	4.58e-05	0.000516162	440.228	726.234	346.962	495.74	477.982	655.082	903.197	620.423
APAF1	620.757	-0.0852928	0.115054	-0.741329	0.458494	0.645	602.142	639.372	618.589	618.371	569.467	701.479	601.795	614.842
APBA1	37.3523	-0.136632	0.338427	-0.403725	0.686415	0.821485	35.4835	39.2211	28.6482	46.9649	30.8376	38.6642	35.2811	43.718
APBA2	94.92	-0.669093	0.299713	-2.23244	0.0255857	0.0840991	73.2444	116.596	45.6249	82.6234	91.4848	82.8519	156.245	110.69
APBA3	81.1745	-1.23168	0.29641	-4.15531	3.25e-05	0.000383419	48.2927	114.056	28.6482	61.7501	54.4797	99.4223	144.149	98.598
APBB1	17.4056	-0.15824	0.511022	-0.309655	0.756823	0.868707	16.3722	18.439	10.6104	20.0036	18.5025	19.8845	25.2008	10.2319
APBB2	2506.61	0.29087	0.0890666	3.26576	0.00109171	0.00707936	2758.19	2255.03	2586.83	2948.35	2739.4	2216.01	2259	2290.08
APBB3	479.94	-0.375163	0.153396	-2.44571	0.0144569	0.0549695	417.63	542.25	345.901	455.733	451.256	516.996	626.996	482.758
APC	1537.29	-0.0398592	0.0999764	-0.398686	0.690124	0.824103	1515.58	1559	1457.88	1644.64	1444.23	1645.99	1475.76	1555.24
APC2	66.7333	-1.16831	0.334021	-3.4977	0.000469281	0.00354094	41.0516	92.415	31.8313	46.0952	45.2284	61.8628	139.108	76.2739
APCDD1	21.3567	-0.0376336	0.504766	-0.0745565	0.940568	0.971385	21.1017	21.6116	24.404	23.4824	15.4188	9.94223	36.2891	18.6034
APCDD1L	7.83372	-0.511411	0.814558	-0.627839	0.53011	0.704274	6.50654	9.1609	14.8546	2.60916	2.05584	11.0469	8.06426	8.37153
APCDD1L-AS1	15.0001	0.703919	0.52758	1.33424	0.182125	0.351806	18.5973	11.4029	11.6715	17.3944	26.7259	9.94223	13.1044	11.162
APEH	3137.69	-0.513776	0.136106	-3.77483	0.000160115	0.00145756	2584.72	3690.66	2055.24	2621.34	3077.59	3544.96	3866.81	3660.22
APEX1	5835.53	-0.0833345	0.08031	-1.03766	0.299428	0.492783	5667.46	6003.59	5645.82	5469.67	5886.89	5753.24	6066.34	6191.21
APEX2	1257.77	-0.0531166	0.127422	-0.416856	0.676783	0.815366	1234.51	1281.03	1031.34	1268.05	1404.14	1220.68	1375.96	1246.43
APH1A	9998.63	0.160483	0.0813795	1.97203	0.0486058	0.136582	10554.5	9442.72	10374.9	10174.9	11113.9	9025.33	9741.62	9561.22
APH1B	308.252	0.0340262	0.134874	0.252282	0.800823	0.895069	311.822	304.682	326.802	327.015	281.65	306	297.369	310.677
API5	5810.16	0.221603	0.095978	2.30889	0.0209494	0.0724662	6255.62	5364.71	6919.07	6029.77	5818.02	5588.64	5156.08	5349.41
APIP	1136.3	0.17082	0.117268	1.45666	0.145209	0.299666	1203.78	1068.83	1380.42	1088.89	1142.02	1106.9	1014.08	1085.51
APITD1	64.646	0.168543	0.297785	0.565989	0.571401	0.736911	68.6218	60.6702	90.1888	59.1409	56.5355	43.083	64.514	74.4136
APLF	7.71353	0.663933	0.741929	0.894874	0.370854	0.566706	9.43794	5.98913	5.30522	14.7852	8.22335	3.31408	9.07229	5.58102
APLN	2.83467	-1.76286	1.18848	-1.48329	0.137997	NA	1.27613	4.3932	1.06104	1.73944	1.02792	4.41877	5.04016	3.72068
APLP1	710.433	-0.332474	0.131567	-2.52704	0.0115029	0.0459554	628.901	791.965	543.255	621.85	721.599	756.714	863.883	755.298
APLP2	7522.84	0.0369192	0.0738912	0.499643	0.617326	0.772454	7619.13	7426.55	7852.79	7566.56	7438.02	7511.91	7350.57	7417.18
APMAP	3532.42	-0.189567	0.0771457	-2.45726	0.0140003	0.0535351	3300.92	3763.92	3312.58	3214.48	3375.69	3709.56	3798.26	3783.93
APOA1	15.7795	-1.035	0.502863	-2.05822	0.0395692	0.117093	10.3035	21.2555	7.42731	12.1761	11.3071	19.8845	26.2088	17.6732
APOA1-AS	3.41682	0.572113	1.12138	0.510188	0.60992	NA	4.09455	2.7391	8.48836	1.73944	2.05584	4.41877	1.00803	2.79051
APOA1BP	2856.79	-0.13045	0.0846586	-1.5409	0.123342	0.266702	2728.07	2985.52	2788.43	2558.72	2837.06	3004.76	2957.57	2994.22
APOBEC2	9.46257	0.268798	0.716736	0.37503	0.707638	0.83533	10.2814	8.64371	5.30522	12.1761	13.3629	15.4657	3.0241	7.44136
APOBEC3A	16.5858	-0.454566	0.522659	-0.869717	0.384455	0.57967	13.9254	19.2462	8.48836	14.7852	18.5025	25.4079	21.1687	11.162
APOBEC3B	138.551	0.785898	0.22128	3.5516	0.000382899	0.00301368	175.528	101.574	166.584	151.331	208.668	81.7472	129.028	93.9472
APOBEC3C	4.09773	-1.31604	1.02011	-1.2901	0.197015	NA	2.36783	5.82764	2.12209	0.86972	4.11168	6.62815	8.06426	2.79051
APOBEC3D	8.01581	-0.390709	0.67054	-0.582679	0.560109	0.728522	6.96737	9.06424	8.48836	5.21832	7.19543	7.73284	11.0884	8.37153
APOBEC3F	261.399	2.25241	0.169425	13.2944	2.49e-40	3e-38	432.033	90.7655	438.212	426.163	431.726	85.0613	111.892	75.3438
APOBEC3G	4.54758	1.7961	1.01734	1.76548	0.0774838	NA	7.07284	2.02233	8.48836	3.47888	9.25127	1.10469	4.03213	0.93017
APOBEC3H	25.299	1.09447	0.427679	2.55909	0.0104946	0.0427863	34.5249	16.073	40.3197	25.2219	38.033	17.6751	10.0803	20.4637
APOBR	13.7796	-0.378397	0.539992	-0.700745	0.483462	0.665586	12.0346	15.5245	11.6715	6.95776	17.4746	16.5704	15.1205	14.8827
APOC1	62.0866	0.0881667	0.279294	0.315677	0.752248	0.8658	64.0631	60.1102	70.029	57.4015	64.7589	48.6065	79.6345	52.0895
APOC3	3.37186	-0.913354	1.12137	-0.814496	0.415361	NA	2.35679	4.38694	1.06104	0.86972	5.13959	3.31408	7.05622	2.79051
APOD	10.4805	1.78865	0.651855	2.74393	0.00607076	0.027762	16.2515	4.70953	11.6715	16.5247	20.5584	5.52346	3.0241	5.58102
APOE	93.2791	-1.02873	0.284995	-3.60966	0.0003066	0.0025046	61.2429	125.315	37.1366	75.6656	70.9264	93.8988	147.173	134.875
APOF	1.83607	-0.953195	1.6143	-0.590471	0.554875	NA	1.2234	2.44873	1.06104	2.60916	0	3.31408	4.03213	0
APOL1	1261.77	5.49582	0.151986	36.16	2.59e-286	1.3e-283	2469.15	54.4029	2431.91	2376.94	2598.58	49.7111	48.3855	65.1119
APOL2	2585.74	3.40339	0.0909367	37.4259	1.48e-306	8.84e-304	4724.9	446.569	4630.4	4627.78	4916.54	445.191	453.614	440.901
APOL3	599.931	6.7407	0.273104	24.6818	1.68e-134	4.2e-132	1188.62	11.2414	1215.96	1174.99	1174.91	13.2563	12.0964	8.37153
APOL4	44.7768	0.237178	0.292126	0.811903	0.416847	0.608729	48.4654	41.0882	47.747	45.2254	52.4239	44.1877	36.2891	42.7878
APOL6	1217.87	6.24389	0.179304	34.823	1.09e-265	4.84e-263	2403.6	32.1346	2424.49	2439.56	2346.74	41.9783	30.241	24.1844
APOLD1	75.3029	0.372794	0.246938	1.50967	0.131128	0.278947	85.0713	65.5346	75.3342	90.4509	89.4289	53.0252	64.514	79.0644
APOM	63.5005	0.297726	0.27791	1.0713	0.284033	0.475053	70.2466	56.7544	81.7005	59.1409	69.8985	45.2924	52.4177	72.5533
APOO	571.83	0.122118	0.131957	0.925439	0.354737	0.551858	596.307	547.353	683.313	550.533	555.076	552.346	499.984	589.728
APOOL	1028.5	-0.0913344	0.0956401	-0.954981	0.339587	0.536844	996.01	1060.98	1031.34	1014.09	942.602	1037.31	1056.42	1089.23
APOPT1	739.898	-0.0416977	0.127015	-0.32829	0.742692	0.859478	729.46	750.337	853.08	672.293	663.008	767.761	717.719	765.53
APP	10549	0.192065	0.0755704	2.54154	0.0110365	0.044571	11250.4	9847.63	11256.6	11219.4	11275.2	9705.82	9528.93	10308.1
APPBP2	15680	0.0993415	0.0769796	1.29049	0.19688	0.371342	16219.4	15140.6	16661.6	16389.9	15606.9	15754	14741.5	14926.4
APPL1	1692.56	0.0610482	0.0881878	0.692253	0.488779	0.669757	1728.08	1657.04	1747.54	1795.1	1641.59	1697.91	1649.14	1624.08
APPL2	1901.31	-0.153804	0.0930951	-1.65212	0.0985107	0.226749	1800.02	2002.6	1799.53	1775.97	1824.56	2119.9	1839.66	2048.23
APRT	1853.65	-0.740406	0.14431	-5.13065	2.89e-07	6.82e-06	1388.07	2319.23	1156.54	1429.82	1577.86	2055.83	2743.86	2157.99
APTR	136.755	0.140673	0.191789	0.733477	0.463268	0.649244	143.588	129.922	164.462	129.588	136.713	117.097	146.165	126.503
APTX	616.387	0.166039	0.13571	1.22349	0.221146	0.401786	652.101	580.674	776.685	573.145	606.472	588.801	575.586	577.636
AQP1	4.40557	-0.216612	0.969766	-0.223366	0.823251	NA	4.11415	4.69699	5.30522	0.86972	6.16751	3.31408	7.05622	3.72068
AQP11	78.5087	-0.183457	0.232073	-0.790513	0.429228	0.619841	73.4456	83.5719	70.029	83.4931	66.8147	83.9566	75.6024	91.1567
AQP3	361.614	0.176129	0.131999	1.33432	0.1821	0.351803	383.949	339.28	391.526	352.237	408.084	313.733	360.875	343.233
AQP4-AS1	4.56898	0.177754	0.92001	0.193209	0.846795	NA	4.86736	4.27059	4.24418	5.21832	5.13959	1.10469	7.05622	4.65085
AQP6	11.7365	-0.382685	0.577866	-0.662238	0.507819	0.685668	10.1453	13.3277	7.42731	14.7852	8.22335	12.1516	11.0884	16.7431
AQP7	3.80137	-0.905723	1.01079	-0.896051	0.370225	NA	2.67982	4.92292	4.24418	1.73944	2.05584	2.20938	6.04819	6.51119
AQP7P1	10.9657	-0.572419	0.57546	-0.994717	0.319874	0.515552	8.82332	13.108	9.5494	8.6972	8.22335	14.361	10.0803	14.8827
AQP7P3	2.96061	-1.85108	1.17827	-1.57101	0.116179	NA	1.27613	4.64509	1.06104	1.73944	1.02792	3.31408	5.04016	5.58102
AQP8	1.97944	-2.29615	1.5721	-1.46056	0.144135	NA	0.696321	3.26256	1.06104	0	1.02792	1.10469	4.03213	4.65085
AQR	1447.04	-0.0146469	0.0909122	-0.16111	0.872007	0.935666	1439.31	1454.76	1422.86	1506.35	1388.72	1514.53	1429.39	1420.37
AR	2255.74	-0.0363605	0.088726	-0.409806	0.681948	0.818309	2226.97	2284.51	2200.61	2302.15	2178.16	2419.28	2157.19	2277.06
ARAF	841.154	-0.253241	0.139452	-1.81597	0.0693756	0.177102	767.423	914.884	631.322	799.273	871.675	838.461	1015.09	891.103
ARAP1	967.938	-0.642861	0.147051	-4.3717	1.23e-05	0.000170541	755.438	1180.44	614.345	847.107	804.86	1111.32	1365.88	1064.11
ARAP2	600.351	0.497919	0.121073	4.11256	3.91e-05	0.000448878	702.49	498.212	652.543	777.53	677.399	535.776	479.823	479.038
ARAP3	34.976	-0.135725	0.375929	-0.361038	0.718071	0.842162	33.4172	36.5348	27.5872	24.3522	48.3122	29.8267	45.3614	34.4163
ARC	53.618	-0.572292	0.297818	-1.92161	0.0546545	0.14898	43.0307	64.2053	37.1366	53.9226	38.033	50.8158	77.6185	64.1817
ARCN1	6346.01	0.0189813	0.0738199	0.25713	0.797079	0.893181	6387.5	6304.53	6227.27	6522.03	6413.19	6385.12	6286.09	6242.37
AREG	126.844	-0.0863568	0.194555	-0.443868	0.657138	0.801906	123.043	130.645	125.203	111.324	132.602	139.191	141.124	111.62
AREL1	2965.39	0.0898434	0.102695	0.874853	0.381654	0.577307	3057.57	2873.2	2705.66	3241.45	3225.61	2710.91	2965.63	2943.06
ARF1	4579.6	-0.319754	0.117831	-2.71366	0.00665437	0.0299283	4073.93	5085.28	3437.79	4332.07	4451.92	4809.83	5530.06	4915.95
ARF3	13892.9	0.132234	0.0865783	1.52733	0.126678	0.27221	14529	13256.8	13286.4	15096.6	15203.9	12947	13307	13516.3
ARF4	2908.98	0.35597	0.0828775	4.29513	1.75e-05	0.00022829	3266.3	2551.66	3432.48	3133.6	3232.8	2568.41	2510	2576.57
ARF5	3320.11	-0.359499	0.0943876	-3.80876	0.000139668	0.00130354	2908.63	3731.59	2783.12	2874.42	3068.34	3544.96	4059.34	3590.46
ARF6	4799.67	0.279627	0.0928807	3.0106	0.0026073	0.0142643	5263.63	4335.72	5790.12	4893.04	5107.73	4429.82	4290.18	4287.15
ARFGAP1	1800.45	-0.807082	0.165395	-4.87971	1.06e-06	2.11e-05	1309.27	2291.63	1028.15	1492.44	1407.22	2035.95	2832.57	2006.38
ARFGAP2	3576.28	-0.0991791	0.105388	-0.941085	0.346661	0.543927	3453.51	3699.05	3119.47	3411.04	3830.03	3444.43	3940.4	3712.31
ARFGAP3	678.221	0.155535	0.10079	1.54316	0.122791	0.265771	714.747	641.695	718.327	705.343	720.571	642.931	655.221	626.935
ARFGEF1	2606.61	-0.0282079	0.0901615	-0.31286	0.754387	0.86714	2580.76	2632.47	2627.15	2705.7	2409.44	2758.42	2550.32	2588.66
ARFGEF2	4144.76	-0.0271918	0.0934807	-0.290881	0.771142	0.877614	4105.07	4184.44	3812.33	4470.36	4032.53	4358.01	4173.25	4022.06
ARFGEF3	4607.03	-0.143124	0.110276	-1.29787	0.194332	0.367877	4378.23	4835.84	3739.12	4874.78	4520.79	4784.42	4997.82	4725.26
ARFIP1	1281.04	0.342059	0.117499	2.91118	0.0036007	0.0183958	1432.31	1129.78	1628.7	1380.25	1287.98	1184.23	1043.31	1161.78
ARFIP2	1997.77	-0.145148	0.110166	-1.31754	0.187656	0.358942	1897.3	2098.24	1665.84	1968.18	2057.89	1947.57	2221.7	2125.44
ARFRP1	452.004	-0.647508	0.1786	-3.62547	0.000288438	0.00238001	352.032	551.976	272.689	383.546	399.86	509.263	671.349	475.317
ARG1	9.82721	0.939331	0.621711	1.51088	0.130819	0.278447	12.9485	6.7059	15.9157	9.56692	13.3629	6.62815	6.04819	7.44136
ARG2	419.837	-0.0977751	0.13642	-0.716721	0.473546	0.658126	405.724	433.95	435.028	356.585	425.558	479.436	411.277	411.135
ARGFXP2	16.5403	0.273718	0.483701	0.565883	0.571473	0.736942	18.1185	14.9621	13.7936	20.0036	20.5584	13.2563	12.0964	19.5336
ARGLU1	1565.21	0.251546	0.103091	2.44004	0.0146856	0.055567	1701.48	1428.94	1893.96	1654.21	1556.27	1425.05	1440.48	1421.3
ARHGAP1	1951.99	-0.180038	0.15431	-1.16673	0.243319	0.429056	1830.21	2073.76	1370.87	1922.08	2197.69	1949.78	2253.96	2017.54
ARHGAP10	772.012	0.0411754	0.103603	0.397433	0.691048	0.824673	782.835	761.189	785.173	808.839	754.492	798.692	714.695	770.181
ARHGAP11A	2258.77	-0.147091	0.0843877	-1.74304	0.0813267	0.197828	2143.72	2373.82	2216.52	2180.39	2034.25	2360.73	2349.72	2411
ARHGAP11B	117.133	0.407952	0.190547	2.14096	0.0322777	0.100518	133.625	100.64	131.57	135.676	133.629	99.4223	92.7389	109.76
ARHGAP12	1805.43	0.331603	0.0926365	3.57961	0.000344105	0.00276156	2012.06	1598.8	2133.76	1936	1966.41	1678.03	1523.14	1595.24
ARHGAP17	939.445	0.00751557	0.0963079	0.0780368	0.937799	0.970041	942.066	936.824	943.269	905.378	977.551	919.104	967.711	923.659
ARHGAP18	320.086	0.760379	0.133321	5.70337	1.17e-08	3.9e-07	402.451	237.721	404.258	382.677	420.419	251.87	239.912	221.38
ARHGAP19	1263.5	0.140419	0.097983	1.4331	0.15183	0.309666	1325.34	1201.66	1348.59	1254.14	1373.3	1173.18	1148.15	1283.63
ARHGAP21	2404.61	0.150006	0.106753	1.40517	0.159971	0.321455	2529.04	2280.19	2211.22	2809.2	2566.71	2301.07	2303.35	2236.13
ARHGAP22	2.02722	-0.0759873	1.41899	-0.0535504	0.957293	NA	1.96141	2.09304	1.06104	1.73944	3.08376	4.41877	0	1.86034
ARHGAP23	2.62074	-0.442772	1.15379	-0.383753	0.701161	NA	2.19859	3.04289	1.06104	3.47888	2.05584	3.31408	3.0241	2.79051
ARHGAP24	22.916	-0.190468	0.479653	-0.397096	0.691297	0.824784	21.4052	24.4268	30.7703	25.2219	8.22335	23.1985	22.1767	27.9051
ARHGAP26	198.477	-0.059619	0.162646	-0.366556	0.71395	0.839232	194.361	202.593	211.148	204.384	167.551	202.159	193.542	212.079
ARHGAP27	767.87	0.531272	0.155674	3.41273	0.000643153	0.0046108	907.593	628.147	713.022	920.164	1089.59	600.952	696.55	586.937
ARHGAP28	7.4296	-0.501708	0.724948	-0.692061	0.488899	0.669804	6.1435	8.7157	5.30522	6.95776	6.16751	5.52346	14.1124	6.51119
ARHGAP29	874.034	0.171176	0.109941	1.55699	0.119473	0.260809	925.742	822.326	914.621	943.646	918.959	869.393	728.807	868.779
ARHGAP30	125.055	-0.293124	0.1866	-1.57087	0.116214	0.255634	112.411	137.699	103.982	107.845	125.406	139.191	138.1	135.805
ARHGAP31	34.7027	0.239762	0.352096	0.680956	0.4959	0.675465	37.4977	31.9076	29.7093	47.8346	34.9492	34.2455	25.2008	36.2766
ARHGAP32	1364.1	0.00973887	0.0968157	0.100592	0.919874	0.96034	1368.32	1359.87	1290.23	1484.61	1330.13	1349.93	1380	1349.68
ARHGAP33	602.566	-1.22291	0.198653	-6.15598	7.46e-10	2.95e-08	361.291	843.84	268.444	393.983	421.447	698.165	1095.73	737.625
ARHGAP35	5172.52	-0.333425	0.0997942	-3.34113	0.000834382	0.00569501	4576.99	5768.05	4058.5	5013.93	4658.53	5635.03	5962.51	5706.59
ARHGAP36	2.4006	0.120231	1.24119	0.0968673	0.922832	NA	2.48849	2.3127	1.06104	4.3486	2.05584	2.20938	1.00803	3.72068
ARHGAP39	349.488	-0.831472	0.177932	-4.67299	2.97e-06	5.21e-05	251.212	447.764	190.988	286.138	276.51	409.841	524.177	409.275
ARHGAP4	203.556	-0.693202	0.225735	-3.07087	0.00213435	0.0121881	155.611	251.502	129.447	151.331	186.053	194.426	338.699	221.38
ARHGAP40	4.08429	0.214339	1.04718	0.204682	0.837821	NA	4.39549	3.77309	9.5494	2.60916	1.02792	4.41877	5.04016	1.86034
ARHGAP42	26.1393	0.293913	0.375386	0.782962	0.433649	0.623384	28.7561	23.5226	25.4651	33.0494	27.7538	23.1985	23.1847	24.1844
ARHGAP44	262.401	-0.00596508	0.141239	-0.042234	0.966312	0.983099	261.813	262.989	247.223	267.874	270.343	250.765	284.265	253.936
ARHGAP5	2193.93	0.172301	0.0969681	1.77688	0.0755877	0.188284	2324.41	2063.44	2365.07	2452.61	2155.55	2200.55	1942.48	2047.3
ARHGAP5-AS1	59.3307	0.430807	0.263927	1.6323	0.102617	0.233502	68.1533	50.5082	80.6394	65.229	58.5914	50.8158	51.4096	49.299
ARHGAP8	18.564	0.0569228	0.469002	0.12137	0.903398	0.952075	18.9355	18.1924	13.7936	23.4824	19.5305	13.2563	17.1365	24.1844
ARHGDIA	2631.25	-0.728241	0.164218	-4.43459	9.22e-06	0.00013419	1980.66	3281.84	1516.23	2217.79	2207.97	2842.37	3984.75	3018.4
ARHGDIB	23.7002	-0.114474	0.474841	-0.241079	0.809494	0.899753	22.6761	24.7243	21.2209	36.5282	10.2792	20.9891	26.2088	26.9749
ARHGDIG	358.239	-0.748423	0.208483	-3.58985	0.000330865	0.00267466	267.157	449.322	211.148	303.532	286.789	383.328	602.803	361.836
ARHGEF1	690.826	-0.935854	0.205272	-4.5591	5.14e-06	8.21e-05	474.096	907.555	314.069	541.835	566.383	767.761	1115.89	839.013
ARHGEF10	799.444	-0.310928	0.115918	-2.68231	0.0073116	0.032313	713.241	885.647	647.237	791.445	701.041	859.45	944.526	852.966
ARHGEF10L	434.581	-0.896262	0.195142	-4.59287	4.37e-06	7.18e-05	303.526	565.637	205.843	347.018	357.716	516.996	656.229	523.686
ARHGEF11	2168.99	-0.17882	0.161502	-1.10723	0.268194	0.457304	2034.5	2303.48	1441.96	2300.41	2361.13	2206.07	2366.86	2337.52
ARHGEF12	4629.7	-0.0388964	0.0890461	-0.436812	0.662247	0.805165	4566.76	4692.64	4361.96	4940.88	4397.44	4863.96	4536.14	4677.82
ARHGEF16	588.756	-0.909088	0.22897	-3.97034	7.18e-05	0.0007471	408.947	768.564	266.322	483.564	476.954	631.884	1029.2	644.608
ARHGEF17	1018.01	-0.674574	0.170779	-3.94997	7.82e-05	0.000797066	784.014	1252	559.171	852.325	940.546	1200.8	1397.13	1158.06
ARHGEF18	365.184	-0.434372	0.151037	-2.87593	0.00402843	0.0199883	310.509	419.858	258.895	320.057	352.576	397.689	464.703	397.183
ARHGEF19	553.353	-0.981412	0.169084	-5.80428	6.46e-09	2.22e-07	371.95	734.757	289.665	380.068	446.117	690.433	860.859	652.979
ARHGEF2	579.165	-0.144744	0.119911	-1.2071	0.227395	0.410014	550.236	608.095	506.118	556.621	587.97	553.451	641.108	629.725
ARHGEF25	293.607	-0.190912	0.14319	-1.33328	0.18244	0.352206	274.145	313.07	241.918	289.617	290.901	290.534	329.626	319.048
ARHGEF26	1844.83	0.0493867	0.0818237	0.603574	0.546127	0.717369	1876.39	1813.27	1874.87	1896.86	1857.45	1787.39	1837.64	1814.76
ARHGEF26-AS1	49.3728	-0.162511	0.336013	-0.483645	0.628638	0.780606	46.4869	52.2586	55.1743	45.2254	39.0609	76.2238	43.3454	37.2068
ARHGEF28	457.586	-0.3286	0.121955	-2.69444	0.00705064	0.0314012	405.565	509.607	402.136	427.032	387.525	486.065	554.418	488.339
ARHGEF3	131.039	0.164945	0.191409	0.861739	0.388831	0.583886	138.742	123.336	149.607	127.849	138.769	113.783	113.908	142.316
ARHGEF33	3.40331	0.879396	1.22251	0.719335	0.471934	NA	4.37757	2.42905	5.30522	7.82748	0	4.41877	1.00803	1.86034
ARHGEF34P	82.7101	0.109098	0.244801	0.44566	0.655843	0.800892	85.6987	79.7214	64.7237	100.888	91.4848	83.9566	70.5622	84.6455
ARHGEF35	467.475	0.396892	0.111721	3.55254	0.000381528	0.00300441	531.402	403.548	540.072	522.702	531.434	406.527	403.213	400.903
ARHGEF37	237.608	0.284831	0.151399	1.88132	0.059928	0.159298	261.084	214.132	242.979	245.261	295.013	213.206	209.671	219.52
ARHGEF38	241.473	-0.102745	0.145285	-0.707198	0.479443	0.662929	232.667	250.279	232.369	248.74	216.891	265.126	242.936	242.774
ARHGEF38-IT1	3.69348	1.0594	1.08211	0.979016	0.327572	NA	4.98387	2.40309	5.30522	3.47888	6.16751	4.41877	0	2.79051
ARHGEF39	328.759	-0.41572	0.139877	-2.97205	0.00295818	0.0157617	281.863	375.655	297.093	256.567	291.929	373.386	411.277	342.303
ARHGEF4	183.336	-0.526071	0.202519	-2.59764	0.00938675	0.0393868	150.105	216.566	114.593	166.116	169.607	199.949	259.064	190.685
ARHGEF40	390.407	-0.431794	0.165246	-2.61303	0.00897434	0.0380888	332.29	448.524	259.956	356.585	380.33	403.213	507.04	435.32
ARHGEF5	453.996	0.362862	0.11667	3.11016	0.00186983	0.0109474	510.879	397.112	502.935	527.05	502.652	375.595	397.165	418.576
ARHGEF6	121.341	-0.0112073	0.209405	-0.0535196	0.957318	0.978887	120.605	122.077	98.6772	135.676	127.462	141.401	116.932	107.9
ARHGEF7	1279.94	0.0365244	0.108827	0.33562	0.737157	0.855415	1295.92	1263.95	1217.02	1434.17	1236.59	1173.18	1339.67	1278.98
ARHGEF9	912.792	-0.157299	0.110941	-1.41786	0.156232	0.316274	862.791	962.793	769.257	945.385	873.731	932.36	973.759	982.26
ARID1A	3231.91	-0.251613	0.0965099	-2.60712	0.00913075	0.0385418	2950.52	3513.31	2678.08	3120.55	3052.92	3375.94	3718.63	3445.35
ARID1B	1433.09	-0.230424	0.115992	-1.98655	0.0469721	0.132942	1318.6	1547.57	1144.87	1437.65	1373.3	1457.09	1671.32	1514.32
ARID2	2573.18	-0.119643	0.0963289	-1.24203	0.214225	0.393522	2466	2680.36	2368.25	2723.09	2306.65	2741.85	2662.21	2637.03
ARID3A	231.02	-0.491746	0.168705	-2.91483	0.00355879	0.0182176	192.191	269.849	169.767	176.553	230.254	244.137	287.289	278.121
ARID3B	158.25	-0.058395	0.213067	-0.274069	0.784032	0.885788	154.948	161.551	111.41	181.771	171.662	139.191	173.381	172.081
ARID3C	3.90897	-2.76431	1.23858	-2.23183	0.0256262	NA	1.02792	6.79003	0	0	3.08376	7.73284	7.05622	5.58102
ARID4A	1461.25	0.16153	0.0952543	1.69578	0.0899278	0.212705	1542.95	1379.55	1575.65	1563.76	1489.45	1421.74	1275.16	1441.76
ARID4B	1189.67	0.322379	0.112793	2.85814	0.00426136	0.0209239	1321.77	1057.56	1393.15	1371.55	1200.61	1159.93	961.662	1051.09
ARID5A	152.658	-0.475518	0.221312	-2.14863	0.0316639	0.0992037	127.655	177.66	92.3109	131.328	159.327	162.39	209.671	160.919
ARID5B	856.456	0.027848	0.0973878	0.28595	0.774916	0.879845	864.686	848.226	849.897	894.072	850.089	834.043	831.626	879.011
ARIH1	2074.51	0.0880451	0.0954198	0.922712	0.356157	0.553202	2137.85	2011.16	2313.08	2050.8	2049.67	2119.9	1931.39	1982.19
ARIH2	2464.4	0.0158126	0.0826009	0.191434	0.848186	0.923449	2478.2	2450.6	2562.42	2430.87	2441.31	2407.12	2407.18	2537.5
ARIH2OS	21.1911	0.181667	0.415696	0.43702	0.662097	0.805099	22.5226	19.8596	19.0988	21.743	26.7259	19.8845	20.1606	19.5336
ARL1	3780.88	0.267446	0.106337	2.51508	0.0119005	0.0472262	4130.61	3431.16	4739.69	3824.16	3827.97	3449.95	3459.57	3383.96
ARL11	15.2629	0.330589	0.526626	0.62775	0.530168	0.704274	16.9324	13.5935	13.7936	22.6127	14.3909	13.2563	19.1526	8.37153
ARL13A	3.41697	0.0646744	1.05465	0.0613233	0.951102	NA	3.47472	3.35922	2.12209	5.21832	3.08376	4.41877	1.00803	4.65085
ARL13B	426.714	0.120554	0.131349	0.917814	0.358716	0.555154	444.357	409.071	482.775	445.297	405	449.61	397.165	380.44
ARL14	1.89777	3.2419	1.90371	1.70294	0.08858	NA	3.45952	0.336011	3.18313	0	7.19543	0	1.00803	0
ARL14EP	691.285	0.27393	0.126087	2.17254	0.029815	0.0945756	756.772	625.797	868.996	733.174	668.147	632.989	648.165	596.239
ARL15	236.545	-0.151676	0.169966	-0.892391	0.372183	0.567879	224.22	248.87	271.627	202.645	198.388	271.754	234.871	239.984
ARL16	373.299	-0.0240222	0.134929	-0.178036	0.858695	0.930128	370.33	376.267	387.281	378.328	345.381	332.512	410.269	386.021
ARL17A	128.578	-0.00818454	0.19288	-0.0424333	0.966153	0.983099	128.061	129.095	126.264	130.458	127.462	139.191	141.124	106.97
ARL2	270.982	-0.828527	0.1869	-4.433	9.29e-06	0.000135057	195.188	346.776	186.744	203.514	195.305	294.953	449.582	295.794
ARL2BP	961.996	0.406252	0.11066	3.67118	0.000241431	0.00206006	1096.98	827.012	1215.96	996.699	1078.29	798.692	826.586	855.756
ARL3	1354.39	0.0035887	0.127212	0.0282103	0.977494	0.988334	1356.41	1352.36	1619.15	1206.3	1243.78	1379.76	1292.3	1385.02
ARL4A	973.068	0.17848	0.127294	1.4021	0.160884	0.322496	1033.48	912.655	1220.2	920.164	960.076	936.779	871.948	929.24
ARL4C	193.709	0.257923	0.15894	1.62277	0.104638	0.236575	211.169	176.249	228.125	195.687	209.695	164.599	186.486	177.662
ARL4D	26.499	-0.4476	0.382304	-1.1708	0.241681	0.427235	22.395	30.603	16.9767	23.4824	26.7259	32.0361	27.2169	32.5559
ARL5A	1335.34	0.0407388	0.105834	0.384932	0.700288	0.830998	1354.01	1316.66	1436.65	1310.67	1314.71	1457.09	1265.08	1227.82
ARL5B	962.537	0.142212	0.112177	1.26775	0.204887	0.381392	1009.47	915.603	975.1	1127.16	926.155	963.292	884.044	899.474
ARL6	59.94	0.420803	0.258273	1.6293	0.10325	0.234565	68.5324	51.3475	68.9679	73.9262	62.7031	57.444	46.3695	50.2292
ARL6IP1	9661.66	0.160542	0.0955275	1.68059	0.092843	0.217823	10199	9124.37	11328.8	9557.35	9710.75	9395.41	8734.6	9243.1
ARL6IP4	2378.52	-0.494933	0.106781	-4.63505	3.57e-06	6.08e-05	1974.19	2782.84	1732.69	2118.64	2071.26	2635.8	2945.47	2767.26
ARL6IP5	1691.01	0.0268908	0.095312	0.282134	0.77784	0.882132	1707.03	1674.99	1854.71	1601.15	1665.23	1708.96	1649.14	1666.86
ARL6IP6	827.267	0.513416	0.101936	5.03667	4.74e-07	1.06e-05	973.04	681.495	1032.4	929.731	956.992	701.479	660.261	682.745
ARL8A	947.424	-0.0392075	0.126449	-0.310065	0.756511	0.868679	934.404	960.445	807.455	991.481	1004.28	887.068	1071.54	922.729
ARL8B	3900.71	0.226735	0.105351	2.15218	0.0313834	0.0985237	4206.62	3594.8	4679.21	3961.57	3979.07	3909.51	3359.77	3515.11
ARL9	3.9509	2.2626	1.09622	2.06399	0.0390184	NA	6.51926	1.38253	8.48836	6.95776	4.11168	2.20938	1.00803	0.93017
ARMC1	1671.65	0.0917133	0.101976	0.89936	0.368461	0.564215	1724.96	1618.34	1870.62	1568.1	1736.16	1704.54	1589.67	1560.83
ARMC10	2584.1	0.221599	0.103687	2.1372	0.0325821	0.101222	2782.23	2385.97	3031.41	2639.6	2675.67	2576.14	2176.34	2405.42
ARMC12	16.7459	-0.108487	0.545083	-0.199029	0.84224	0.919572	16.0362	17.4556	13.7936	26.0916	8.22335	19.8845	11.0884	21.3939
ARMC2	68.9278	-0.234899	0.250497	-0.937732	0.348382	0.545635	63.3914	74.4643	76.3952	58.2712	55.5076	72.9097	81.6506	68.8326
ARMC3	5.97904	-0.801934	0.827711	-0.968857	0.332617	0.529763	4.37341	7.58466	7.42731	2.60916	3.08376	11.0469	7.05622	4.65085
ARMC4	4.51233	0.818281	1.10392	0.741247	0.458543	NA	5.80774	3.21691	8.48836	1.73944	7.19543	2.20938	0	7.44136
ARMC5	236.804	-0.697657	0.204853	-3.40565	0.00066006	0.00471025	180.446	293.162	125.203	204.384	211.751	266.231	340.715	272.54
ARMC6	733.551	-0.846186	0.181839	-4.6535	3.26e-06	5.65e-05	524.236	942.866	401.075	566.188	605.444	804.216	1184.44	839.943
ARMC7	356.543	-0.333385	0.161526	-2.06397	0.0390203	0.1158	315.261	397.825	241.918	357.455	346.409	386.642	414.301	392.532
ARMC8	1768.37	0.374122	0.0984236	3.80114	0.000144029	0.00133064	1996.59	1540.15	2098.75	1908.17	1982.86	1592.97	1406.2	1621.29
ARMC9	702.318	-0.0903613	0.109196	-0.827515	0.407945	0.600846	680.174	724.461	688.618	682.73	669.175	784.331	666.309	722.742
ARMCX2	9.82762	-0.0922217	0.662224	-0.139261	0.889244	0.944395	9.51275	10.1425	7.42731	13.9155	7.19543	6.62815	7.05622	16.7431
ARMCX3	899.202	0.155908	0.104439	1.4928	0.135488	0.285373	947.938	850.465	991.016	963.65	889.15	792.064	871.948	887.382
ARMCX5	181.556	0.236696	0.17936	1.31967	0.186945	0.357998	196.402	166.71	212.209	187.859	189.137	191.112	135.076	173.942
ARMCX5-GPRASP2	8.37758	0.339107	0.848691	0.399564	0.689478	0.8235	9.3504	7.40477	9.5494	11.3064	7.19543	2.20938	18.1446	1.86034
ARMCX6	755.73	-0.0313947	0.1035	-0.30333	0.761638	0.871976	747.761	763.699	795.784	727.956	719.543	741.248	761.064	788.784
ARMT1	11888.9	-0.00488042	0.097347	-0.0501343	0.960015	0.980032	11868.9	11908.8	13218.5	11188.1	11200.2	12526.1	11403.9	11796.4
ARNT	3403.12	-0.0717512	0.089322	-0.803287	0.421809	0.613178	3318.33	3487.91	3077.03	3508.45	3369.52	3349.43	3545.25	3569.06
ARNT2	790.967	0.319589	0.100057	3.19407	0.00140281	0.0087304	878.134	703.799	840.347	874.068	919.987	714.736	704.614	692.046
ARNTL	308.886	-0.0352696	0.130402	-0.270469	0.786799	0.887009	305.208	312.563	306.642	291.356	317.627	319.256	299.385	319.048
ARNTL2	262.041	0.286397	0.155221	1.84509	0.0650243	0.169279	287.792	236.289	264.2	322.666	276.51	246.346	207.655	254.867
ARPC1A	6045.18	-0.320977	0.0757996	-4.23455	2.29e-05	0.000286655	5375.75	6714.62	5395.41	5327.03	5404.8	6475.71	6734.66	6933.49
ARPC1B	2164.89	-0.653739	0.150139	-4.35421	1.34e-05	0.000182461	1682.5	2647.28	1392.09	1824.67	1830.72	2193.92	3160.18	2587.73
ARPC2	5525.26	0.159021	0.0775494	2.05057	0.0403086	0.118693	5829.66	5220.86	6051.14	5644.48	5793.35	5302.52	5091.57	5268.48
ARPC3	7342.63	0.239583	0.100269	2.38939	0.0168762	0.0616462	7951.26	6734	8831.08	7336.96	7685.75	6925.31	6279.03	6997.67
ARPC4	3262.58	-0.0753011	0.0959632	-0.784687	0.432637	0.622678	3177.89	3347.28	3266.96	3122.29	3144.4	2999.24	3544.24	3498.37
ARPC5	4012.72	0.238684	0.0984636	2.42408	0.0153472	0.0574262	4344.12	3681.31	4856.4	4069.42	4106.54	3792.41	3587.59	3663.94
ARPC5L	1556.75	0.0943023	0.105543	0.893497	0.371591	0.567313	1607.95	1505.54	1752.85	1460.26	1610.75	1555.41	1403.18	1558.03
ARPIN	25.8436	0.114208	0.379465	0.300971	0.763437	0.873069	26.9181	24.7691	28.6482	24.3522	27.7538	24.3032	21.1687	28.8353
ARPP19	14249.1	-0.0438386	0.0773381	-0.566844	0.57082	0.736528	14032.4	14465.9	14056.7	14134.7	13905.7	15264.6	13885.6	14247.4
ARR3	14.1397	-0.476183	0.53209	-0.894929	0.370825	0.566706	11.753	16.5263	7.42731	16.5247	11.3071	15.4657	20.1606	13.9525
ARRB1	1448.54	-0.533189	0.103623	-5.14546	2.67e-07	6.38e-06	1183.55	1713.53	1050.43	1258.48	1241.73	1679.13	1762.04	1699.42
ARRB2	1529.48	-0.121567	0.0920023	-1.32135	0.186385	0.357286	1465.2	1593.76	1405.88	1488.96	1500.76	1518.95	1580.59	1681.75
ARRDC1	1183.48	-0.745597	0.188357	-3.95842	7.54e-05	0.000774992	884.053	1482.9	621.772	1027.14	1003.25	1247.2	1816.47	1385.02
ARRDC1-AS1	210.217	-0.451257	0.154233	-2.92582	0.00343549	0.0176889	177.596	242.838	172.95	186.12	173.718	220.938	261.08	246.495
ARRDC2	842.271	-0.114866	0.118728	-0.967473	0.333308	0.530483	808.737	875.806	703.473	825.364	897.373	848.404	861.867	917.148
ARRDC3	1386.58	0.627288	0.107797	5.81917	5.91e-09	2.05e-07	1683.68	1089.47	1845.16	1577.67	1628.22	1096.96	1005.01	1166.43
ARRDC3-AS1	74.6737	0.0176868	0.270619	0.0653567	0.94789	0.974118	75.0837	74.2637	67.9069	95.6692	61.6751	56.3393	83.6666	82.7851
ARRDC4	2120.87	0.364618	0.103531	3.52183	0.000428575	0.00329918	2387.25	1854.49	2469.05	2343.89	2348.79	2064.67	1667.28	1831.5
ARSA	233.272	-0.641548	0.162875	-3.9389	8.19e-05	0.00082876	182.118	284.426	159.157	193.948	193.249	261.812	323.578	267.889
ARSB	223.111	0.29074	0.166399	1.74725	0.0805944	0.196652	245.609	200.613	245.101	240.912	250.812	208.787	163.301	229.752
ARSD	1067.4	-0.131264	0.0933662	-1.4059	0.159753	0.321205	1018.91	1115.9	989.955	1030.62	1036.14	1072.66	1154.2	1120.85
ARSG	517.713	0.0197625	0.132229	0.149456	0.881194	0.939936	521.446	513.979	543.255	546.184	474.899	461.761	496.96	583.217
ARSJ	3.94468	0.972918	1.01481	0.958718	0.337701	NA	5.24065	2.64871	2.12209	4.3486	9.25127	2.20938	2.01606	3.72068
ARSK	115.777	-0.0934331	0.188103	-0.496713	0.619392	0.77429	112.04	119.513	111.41	109.585	115.127	118.202	124.996	115.341
ART5	5.92145	-0.68321	0.816317	-0.836942	0.402625	0.596014	4.55537	7.28753	2.12209	4.3486	7.19543	4.41877	9.07229	8.37153
ARTN	89.0337	-0.521702	0.251637	-2.07324	0.0381503	0.114101	73.0811	104.986	67.9069	72.1867	79.1498	95.0035	138.1	81.855
ARV1	467.69	0.0627832	0.126655	0.495703	0.620104	0.774618	478.115	457.266	537.95	457.473	438.921	440.772	456.638	474.387
ARVCF	158.866	-1.3734	0.250648	-5.47938	4.27e-08	1.26e-06	88.2501	229.482	54.1133	107.845	102.792	203.263	284.265	200.917
ARX	12.6524	1.08895	0.579193	1.88011	0.0600933	0.159656	17.2361	8.06874	20.1599	13.0458	18.5025	9.94223	4.03213	10.2319
ASAH1	1553.99	0.167322	0.094795	1.7651	0.0775478	0.191354	1644.16	1463.82	1773.01	1555.93	1603.55	1507.9	1445.52	1438.04
ASAH2	14.4273	0.112962	0.519002	0.217652	0.8277	0.911605	15.0485	13.806	20.1599	9.56692	15.4188	14.361	13.1044	13.9525
ASAH2B	11.6853	-0.549432	0.595778	-0.922208	0.35642	0.553365	9.53925	13.8314	7.42731	7.82748	13.3629	9.94223	11.0884	20.4637
ASAP1	2212.18	0.214991	0.104287	2.06153	0.0392528	0.116312	2376.28	2048.07	2092.38	2612.64	2423.83	2072.4	2029.17	2042.65
ASAP1-IT2	3.7323	1.1693	1.10598	1.05725	0.290396	NA	5.1904	2.27421	7.42731	6.08804	2.05584	0	4.03213	2.79051
ASAP2	2181.17	-0.0782205	0.0865326	-0.903942	0.366026	0.561764	2121.61	2240.73	2055.24	2240.4	2069.2	2307.7	2214.65	2199.85
ASAP3	402.462	-0.201269	0.155355	-1.29555	0.195132	0.368987	374.384	430.54	298.154	392.244	432.754	395.48	450.59	445.551
ASB1	699.408	-0.420834	0.109707	-3.83598	0.000125066	0.00118652	597.962	800.854	561.293	609.674	622.919	787.645	856.827	758.089
ASB13	568.118	-0.24072	0.116421	-2.06767	0.0386711	0.115121	520.863	615.373	512.485	505.307	544.797	599.848	672.357	573.915
ASB14	26.2002	0.179422	0.429692	0.417559	0.67627	0.815	27.8764	24.5239	37.1366	15.655	30.8376	30.9314	22.1767	20.4637
ASB16	72.2731	-0.299341	0.320039	-0.935329	0.349619	0.547185	64.7968	79.7494	39.2587	73.9262	81.2056	53.0252	98.7871	87.436
ASB16-AS1	190.936	-0.109656	0.157338	-0.696949	0.485835	0.667549	183.808	198.065	177.194	174.814	199.416	192.216	194.55	207.428
ASB3	23.271	0.913166	0.476777	1.91529	0.0554559	0.150688	30.4753	16.0668	48.8081	20.0036	22.6142	16.5704	12.0964	19.5336
ASB6	578.232	-0.225727	0.123914	-1.82164	0.0685095	0.175642	532.841	623.623	473.226	560.969	564.327	614.209	674.373	582.286
ASB7	810.923	0.168437	0.0991781	1.69833	0.0894462	0.211986	858.034	763.813	848.836	856.674	868.591	786.541	781.225	723.672
ASB8	1152.89	0.265952	0.105007	2.5327	0.0113186	0.0453476	1259.08	1046.71	1370.87	1215	1191.36	1063.82	977.791	1098.53
ASB9	18.5975	-1.19654	0.485873	-2.46266	0.013791	0.0529697	11.4046	25.7905	16.9767	6.95776	10.2792	22.0938	29.2329	26.0448
ASB9P1	1.77136	-0.32388	1.49852	-0.216134	0.828884	NA	1.56604	1.97669	1.06104	2.60916	1.02792	2.20938	0	3.72068
ASCC1	922.051	0.163709	0.104396	1.56816	0.116844	0.256803	974.605	869.496	1020.73	935.819	967.272	866.079	809.45	932.96
ASCC2	1040.8	-0.213267	0.14373	-1.4838	0.137861	0.28893	963.785	1117.81	751.22	1056.71	1083.43	1052.77	1196.53	1104.11
ASCC3	2433.49	0.365301	0.0851943	4.28785	1.8e-05	0.000234321	2739.57	2127.4	2653.67	2831.81	2733.24	2225.95	2050.34	2105.9
ASCL2	301.818	-0.362796	0.165495	-2.19219	0.0283661	0.0910213	264.112	339.524	237.674	267.874	286.789	283.906	407.245	327.42
ASF1A	789.245	0.112127	0.125352	0.8945	0.371055	0.566844	819.988	758.501	941.147	776.66	742.157	811.949	703.606	759.949
ASF1B	2041.78	-0.058621	0.110656	-0.529757	0.59628	0.755499	2000.08	2083.48	1719.95	2068.19	2212.08	2084.55	2126.95	2038.93
ASGR1	9.53633	-0.291293	0.657722	-0.442882	0.657851	0.802293	8.56822	10.5044	5.30522	12.1761	8.22335	6.62815	9.07229	15.8129
ASH1L	5656.45	-0.107994	0.0897852	-1.2028	0.229053	0.411854	5444.33	5868.58	5257.48	5941.06	5134.45	5999.58	5713.52	5892.63
ASH1L-AS1	109.904	-0.1171	0.20434	-0.573063	0.566602	0.733506	105.469	114.338	115.654	111.324	89.4289	103.841	121.972	117.201
ASH2L	1204.87	0.130048	0.106245	1.22404	0.220939	0.401591	1259.64	1150.1	1381.48	1156.73	1240.7	1102.48	1133.03	1214.8
ASIC1	813.999	-0.364273	0.124533	-2.92511	0.0034433	0.01772	711.72	916.279	624.955	705.343	804.86	887.068	993.919	867.849
ASIC3	108.804	-0.588623	0.230839	-2.54993	0.0107744	0.0436743	86.821	130.787	63.6627	99.1481	97.6523	110.469	145.157	136.735
ASIC4	3.28831	0.223487	1.06102	0.210634	0.833173	NA	3.52745	3.04916	2.12209	4.3486	4.11168	4.41877	1.00803	3.72068
ASIP	1.85258	1.39853	1.47038	0.951139	0.341534	NA	2.69086	1.0143	5.30522	1.73944	1.02792	1.10469	1.00803	0.93017
ASL	673.271	-0.751241	0.171494	-4.38055	1.18e-05	0.00016508	501.719	844.822	392.587	512.265	600.305	778.808	1017.1	738.555
ASNA1	1808.06	-0.474542	0.121224	-3.9146	9.06e-05	0.000902105	1513.13	2102.98	1260.52	1611.59	1667.28	1989.55	2211.62	2107.77
ASNS	2200.99	0.339538	0.106371	3.19202	0.00141279	0.00877822	2459.12	1942.86	2767.2	2266.49	2343.66	1982.92	1834.62	2011.03
ASNSD1	1639.9	0.0936332	0.111452	0.840124	0.400839	0.594782	1693.08	1586.72	1879.11	1603.76	1596.36	1746.52	1479.79	1533.85
ASPDH	1.94007	0.393749	1.42367	0.276573	0.782108	NA	2.18755	1.69259	0	3.47888	3.08376	2.20938	1.00803	1.86034
ASPG	3.05816	-1.14714	1.21941	-0.940729	0.346844	NA	1.89764	4.21868	0	2.60916	3.08376	1.10469	5.04016	6.51119
ASPH	6308.2	0.270037	0.085967	3.14117	0.00168276	0.0100415	6896.85	5719.55	7355.16	6701.19	6634.19	6000.69	5510.91	5647.06
ASPHD1	205.18	-0.771243	0.187966	-4.10311	4.08e-05	0.000464871	151.601	258.76	144.302	163.507	146.992	203.263	313.498	259.517
ASPHD2	38.0185	0.807894	0.364929	2.21384	0.02684	0.0871819	48.4196	27.6174	50.9302	40.8768	53.4518	34.2455	15.1205	33.4861
ASPM	3661.7	-0.245309	0.100336	-2.44488	0.0144899	0.0550679	3350.48	3972.92	3221.33	3720.66	3109.45	4175.74	3977.69	3765.33
ASPN	7.45847	0.444344	0.70353	0.631591	0.527654	0.702136	8.57926	6.33767	6.36627	12.1761	7.19543	5.52346	6.04819	7.44136
ASPRV1	42.4004	0.0340439	0.30942	0.110025	0.91239	0.956433	42.9766	41.8242	44.5639	39.1374	45.2284	41.9783	33.2651	50.2292
ASPSCR1	344.001	-0.691445	0.192545	-3.59108	0.000329315	0.00266352	263.008	424.995	210.087	275.701	303.236	368.967	542.321	363.696
ASRGL1	267.451	-0.0345098	0.140646	-0.245367	0.806172	0.898248	264.387	270.514	271.627	240.912	280.622	273.964	276.201	261.378
ASS1	7402.11	-0.32468	0.115497	-2.81115	0.00493645	0.0235387	6572.56	8231.66	5552.45	6733.37	7431.85	7870.93	8683.19	8140.85
ASTE1	331.236	0.263746	0.144458	1.82575	0.0678874	0.174595	361.795	300.677	372.427	313.099	399.86	279.487	304.426	318.118
ASTL	6.37431	-1.15737	0.768048	-1.5069	0.131836	0.279973	3.95595	8.79267	5.30522	3.47888	3.08376	9.94223	8.06426	8.37153
ASTN2	186.13	-0.304599	0.186886	-1.62987	0.10313	0.234394	166.483	205.776	148.546	184.381	166.523	171.227	247.976	198.126
ASUN	1361.98	0.299828	0.120802	2.48197	0.0130657	0.0507901	1503.19	1220.77	1745.42	1389.81	1374.33	1282.55	1137.06	1242.71
ASXL1	2411.62	-0.0428892	0.0886871	-0.483601	0.628669	0.780606	2375.74	2447.49	2221.83	2395.21	2510.18	2386.13	2510	2446.35
ASXL2	2391.85	-0.179073	0.132054	-1.35606	0.175079	0.341512	2243.03	2540.67	1812.26	2620.47	2296.37	2691.03	2470.69	2460.3
ASZ1	3.27596	0.550482	1.04967	0.524434	0.599977	NA	3.90322	2.64871	5.30522	4.3486	2.05584	2.20938	2.01606	3.72068
ATAD1	1529.08	0.179738	0.0922942	1.94744	0.0514817	0.142636	1624.39	1433.77	1742.24	1571.58	1559.35	1428.37	1452.57	1420.37
ATAD2	13645.4	0.023919	0.079749	0.299929	0.764231	0.873278	13758.3	13532.6	14084.3	13946.8	13243.7	14227.3	12958.2	13412.1
ATAD2B	1912.68	0.107281	0.0945652	1.13447	0.256598	0.444295	1983.35	1842.01	2000.07	2115.16	1834.84	1917.75	1808.41	1799.88
ATAD3A	387.048	-0.995609	0.220539	-4.51444	6.35e-06	9.72e-05	258.356	515.741	170.828	294.835	309.404	446.296	657.237	443.691
ATAD3B	245.711	-1.07621	0.224	-4.80452	1.55e-06	2.93e-05	157.851	333.571	109.288	184.381	179.886	303.79	424.381	272.54
ATAD3C	38.5096	-0.492077	0.333312	-1.47632	0.139857	0.292156	31.8661	45.1531	25.4651	38.2677	31.8655	49.7111	50.4016	35.3465
ATAD5	893.73	0.306569	0.0996447	3.07662	0.00209363	0.0120042	988.328	799.132	971.917	1028.88	964.188	786.541	768.12	842.734
ATAT1	333.864	-0.186618	0.133319	-1.39978	0.161578	0.323559	312.022	355.707	292.848	346.148	297.069	361.234	347.771	358.115
ATCAY	5.13761	0.0436037	0.829585	0.0525608	0.958082	NA	5.21	5.06522	4.24418	5.21832	6.16751	4.41877	7.05622	3.72068
ATE1	1135.49	0.0738739	0.0948611	0.778758	0.436122	0.626069	1164.32	1106.66	1162.91	1199.34	1130.71	1159.93	1050.37	1109.69
ATE1-AS1	8.51192	0.340484	0.740658	0.459704	0.645729	0.792344	9.5238	7.50004	8.48836	13.9155	6.16751	5.52346	3.0241	13.9525
ATF1	1541.29	0.207129	0.102029	2.03011	0.0423458	0.123311	1651.85	1430.73	1817.57	1572.45	1565.52	1501.28	1365.88	1425.02
ATF2	1006.23	0.149911	0.0921384	1.62702	0.103733	0.235181	1058.28	954.188	1048.31	1086.28	1040.25	967.71	952.59	942.262
ATF3	664.554	1.40104	0.111933	12.5168	6.05e-36	6.8e-34	964.058	365.05	931.597	919.294	1041.28	372.281	362.891	359.976
ATF4	8330.37	0.390242	0.0962548	4.05426	5.03e-05	0.00055559	9450.8	7209.94	10392.9	8721.55	9237.91	6840.25	7211.46	7578.09
ATF5	1038.33	0.0326055	0.0983679	0.331464	0.740294	0.857601	1050.12	1026.54	1071.66	1061.06	1017.64	975.443	1097.75	1006.44
ATF6	1360.24	0.145753	0.090738	1.6063	0.108207	0.242525	1428.68	1291.8	1423.92	1421.99	1440.11	1367.61	1252.98	1254.8
ATF6B	2457.41	-0.383817	0.119581	-3.20968	0.00132884	0.00834909	2132.3	2782.53	1805.9	2247.36	2343.66	2563.99	2995.87	2787.72
ATF7	864.126	0.246226	0.0999153	2.46435	0.0137263	0.052747	937.485	790.767	933.719	934.079	944.657	845.089	757.032	770.181
ATF7IP	1773.23	-0.279053	0.0848701	-3.28801	0.001009	0.00662466	1602.03	1944.44	1571.41	1668.12	1566.55	1951.99	1923.32	1958.01
ATF7IP2	237.005	0.255387	0.150428	1.69773	0.0895582	0.212093	257.99	216.02	287.543	253.088	233.338	213.206	222.775	212.079
ATG10	274.816	0.12821	0.138614	0.924948	0.354993	0.552069	287.248	262.385	292.848	268.743	300.152	254.079	254.024	279.051
ATG101	1407.81	-0.11223	0.0990664	-1.13288	0.257264	0.445051	1353.04	1462.57	1262.64	1387.2	1409.28	1376.45	1557.41	1453.86
ATG12	1439.58	0.159149	0.0903503	1.76146	0.0781603	0.192117	1519.21	1359.94	1601.12	1456.78	1499.73	1332.26	1370.92	1376.65
ATG13	1780.34	0.0872473	0.0901685	0.967604	0.333242	0.530433	1834.26	1726.42	1751.78	1824.67	1926.32	1655.93	1792.28	1731.05
ATG14	568.234	0.0734786	0.109111	0.673428	0.500675	0.679341	582.528	553.94	595.246	593.149	559.188	582.173	538.289	541.359
ATG16L1	841.364	-0.000129828	0.0980885	-0.00132358	0.998944	0.999524	841.505	841.223	863.69	809.709	851.117	851.718	812.474	859.477
ATG16L2	470.968	-0.663098	0.161847	-4.09707	4.18e-05	0.000476104	364.146	577.79	276.933	433.12	382.386	589.906	605.827	537.638
ATG2A	524.788	-0.941639	0.200265	-4.70197	2.58e-06	4.61e-05	359.08	690.497	240.857	420.075	416.307	625.256	828.602	617.633
ATG2B	2769.56	-0.0399521	0.0936276	-0.426712	0.669589	0.80996	2730.77	2808.34	2481.78	2924.87	2785.66	2831.33	2837.61	2756.09
ATG3	1851.26	0.310584	0.122965	2.52579	0.0115438	0.0460712	2050.06	1652.45	2384.17	1821.19	1944.82	1728.84	1503.98	1724.54
ATG4A	191.874	0.215743	0.168478	1.28054	0.200354	0.37567	206.3	177.448	231.308	197.426	190.165	184.484	156.245	191.615
ATG4B	877.131	-0.433036	0.138032	-3.13722	0.00170557	0.0101582	746.222	1008.04	622.833	836.67	779.163	903.638	1127.99	992.491
ATG4C	255.288	0.104618	0.150397	0.695612	0.486672	0.668286	264.443	246.133	289.665	260.046	243.617	262.917	255.032	220.45
ATG4D	283.301	-1.08553	0.204482	-5.30867	1.1e-07	3.01e-06	181.215	385.387	123.081	213.951	206.612	344.664	450.59	360.906
ATG5	1019.49	0.0819476	0.132775	0.617191	0.537109	0.71009	1048.7	990.272	1254.15	912.336	979.607	1045.04	943.518	982.26
ATG7	1279.01	0.0564512	0.0877726	0.643153	0.520125	0.696236	1304.12	1253.9	1332.67	1279.36	1300.32	1249.41	1275.16	1237.13
ATG9A	1280.97	-0.535203	0.167822	-3.18911	0.00142709	0.0088478	1045.87	1516.08	754.403	1121.94	1261.26	1421.74	1700.55	1425.95
ATG9B	4.46228	0.268709	0.874478	0.307279	0.758631	NA	4.86736	4.05719	4.24418	5.21832	5.13959	4.41877	4.03213	3.72068
ATHL1	875.043	-0.427502	0.15625	-2.73602	0.00621876	0.0283303	746.136	1003.95	594.185	787.966	856.256	950.035	1175.37	886.452
ATIC	6493.8	0.167371	0.0813054	2.05854	0.0395379	0.117023	6870.5	6117.09	7264.97	6521.16	6825.38	6015.05	6097.58	6238.65
ATL1	24.9636	-0.0736063	0.424777	-0.173282	0.86243	0.931831	24.2866	25.6407	26.5261	27.831	18.5025	32.0361	15.1205	29.7654
ATL2	2451.14	0.0757843	0.0889803	0.851697	0.394382	0.588464	2515.39	2386.89	2661.1	2490.01	2395.05	2496.6	2362.83	2301.24
ATL3	3386.49	0.0457453	0.10436	0.438343	0.661138	0.804384	3440.22	3332.76	3784.75	3365.82	3170.1	3543.85	3046.27	3408.14
ATM	1558.28	-0.142084	0.0917414	-1.54875	0.121443	0.263883	1481.26	1635.3	1495.01	1555.93	1392.83	1682.45	1631	1592.45
ATMIN	3058.57	0.137719	0.0791129	1.74079	0.0817198	0.19841	3204.44	2912.69	3200.11	3147.52	3265.7	2991.51	2829.55	2917.01
ATN1	3423.66	-0.669197	0.151038	-4.43065	9.4e-06	0.000136409	2643.32	4204	2005.37	2872.68	3051.89	3886.31	4741.78	3983.92
ATOH7	10.0076	-0.342191	0.610335	-0.560662	0.575028	0.73956	8.81228	11.2029	8.48836	8.6972	9.25127	11.0469	15.1205	7.44136
ATOH8	7.08158	-0.521421	0.811784	-0.642316	0.520668	0.696723	5.80942	8.35373	1.06104	6.08804	10.2792	5.52346	12.0964	7.44136
ATOX1	1318.2	-0.0274043	0.0963205	-0.284511	0.776019	0.881032	1305.91	1330.48	1337.98	1284.58	1295.18	1324.53	1241.9	1425.02
ATP10D	18.1557	2.98882	0.571526	5.22955	1.7e-07	4.35e-06	32.196	4.11537	31.8313	33.9191	30.8376	5.52346	4.03213	2.79051
ATP11A	2101.04	-0.208838	0.160406	-1.30194	0.192937	0.36622	1948.82	2253.26	1406.95	2379.55	2059.95	2198.34	2346.7	2214.73
ATP11A-AS1	5.18271	-0.638224	0.880308	-0.725	0.468452	0.65335	4.0018	6.36362	2.12209	7.82748	2.05584	5.52346	7.05622	6.51119
ATP11B	1231.65	-0.10319	0.0983862	-1.04883	0.294258	0.487321	1187.32	1275.99	1214.9	1235.87	1111.18	1352.14	1224.76	1251.08
ATP11C	1522.33	0.288129	0.09104	3.16486	0.0015516	0.00943268	1673.89	1370.77	1762.4	1628.99	1630.28	1420.63	1321.53	1370.14
ATP12A	3.04022	1.45145	1.21291	1.19666	0.231437	NA	4.47199	1.60846	4.24418	6.08804	3.08376	1.10469	0	3.72068
ATP13A1	1511.34	-0.646207	0.194953	-3.31467	0.000917501	0.00613552	1178.21	1844.47	793.662	1285.45	1455.53	1694.6	2239.85	1598.96
ATP13A2	486.673	-1.07226	0.217603	-4.92761	8.32e-07	1.7e-05	313.481	659.865	202.66	357.455	380.33	592.115	826.586	560.893
ATP13A3	5490.09	-0.130248	0.0883757	-1.4738	0.140536	0.293022	5241.96	5738.21	5195.94	5527.07	5002.88	6104.53	5421.2	5688.92
ATP13A4	23.776	0.757044	0.42604	1.77693	0.0755794	0.188284	29.9091	17.643	22.2819	30.4402	37.0051	16.5704	13.1044	23.2542
ATP13A5	2.54215	0.920672	1.29937	0.70855	0.478604	NA	3.30132	1.78298	3.18313	2.60916	4.11168	4.41877	0	0.93017
ATP1A1	37613.8	-0.0141676	0.0759242	-0.186601	0.851973	0.925884	37429	37798.6	35488.8	38233.8	38564.4	37381.7	37531	38483
ATP1A1-AS1	228.194	0.179764	0.161904	1.11031	0.266866	0.455818	242.388	214	234.491	258.307	234.366	185.588	248.984	207.428
ATP1A3	137.184	-0.177066	0.228348	-0.775425	0.438089	0.627836	128.613	145.756	88.0667	137.416	160.355	155.762	152.213	129.294
ATP1B1	3200.75	0.300196	0.104222	2.88037	0.00397213	0.0197728	3532.78	2868.73	3940.72	3357.99	3299.62	2971.62	2656.16	2978.4
ATP1B2	15.8254	-0.359313	0.493024	-0.728794	0.466128	0.651689	13.8199	17.831	8.48836	16.5247	16.4467	17.6751	18.1446	17.6732
ATP1B3	2315.68	0.106453	0.120331	0.884663	0.376338	0.571739	2401.3	2230.06	2785.24	2109.94	2308.71	2406.02	2104.77	2179.39
ATP2A1	70.3185	-0.45549	0.272948	-1.66878	0.0951607	0.221438	59.1522	81.4847	41.3807	71.317	64.7589	89.4801	67.5381	87.436
ATP2A1-AS1	16.8282	-0.720211	0.477868	-1.50713	0.131777	0.279949	12.7572	20.8993	12.7325	12.1761	13.3629	16.5704	19.1526	26.9749
ATP2A2	10025.8	-0.0826791	0.0821389	-1.00658	0.314138	0.50895	9738.37	10313.3	9085.73	10196.6	9932.78	10096.9	10522.8	10320.2
ATP2A3	4236.8	-0.612726	0.174251	-3.51634	0.000437545	0.00335365	3350.17	5123.43	2484.97	3661.52	3904.04	4550.23	6350.6	4469.47
ATP2B1	3360.84	-0.0931416	0.0897958	-1.03726	0.299615	0.492985	3252.45	3469.23	3480.23	3189.26	3087.87	3613.45	3303.32	3490.93
ATP2B4	1245.29	0.0102668	0.104425	0.0983172	0.92168	0.961514	1249.46	1241.13	1217.02	1369.81	1161.55	1186.44	1305.4	1231.55
ATP2C1	3198.07	0.132105	0.0835345	1.58144	0.113776	0.251817	3344.26	3051.89	3473.86	3335.38	3223.55	3188.14	2956.56	3010.96
ATP2C2	832.884	-0.390133	0.141646	-2.75429	0.00588199	0.0270903	720.739	945.03	582.514	769.702	810	893.696	1049.36	892.033
ATP5A1	13982	0.0666766	0.091875	0.725732	0.468003	0.65305	14305.4	13658.6	15751.2	13318	13847.1	13863.9	13189.1	13922.8
ATP5B	26502.9	0.0844824	0.0903061	0.935511	0.349525	0.547093	27279.2	25726.7	29937.4	25144.5	26755.7	25690.7	25298.6	26190.8
ATP5C1	6382.62	0.183621	0.103565	1.773	0.076228	0.189408	6788.56	5976.67	7743.51	6304.6	6317.59	6065.86	5802.23	6061.92
ATP5D	423.617	-1.3109	0.2309	-5.67736	1.37e-08	4.51e-07	243.218	604.016	162.34	277.441	289.873	476.122	809.45	526.476
ATP5E	277.636	-1.31664	0.684601	-1.92322	0.0544525	0.148562	159.005	396.268	65.7848	242.652	168.579	196.635	634.052	358.115
ATP5F1	10123.6	0.0542706	0.10725	0.506018	0.612844	0.768922	10314.4	9932.89	11887.9	9484.29	9570.95	10078.1	9538	10182.6
ATP5G1	1792.01	-0.0366271	0.0972442	-0.37665	0.706433	0.834822	1769.76	1814.25	1786.8	1690.74	1831.75	1687.97	1790.26	1964.52
ATP5G2	8665.31	-0.0656611	0.085054	-0.771993	0.440119	0.629507	8468.37	8862.25	8094.71	8147.54	9162.87	8781.2	8794.07	9011.49
ATP5G3	6148.96	0.145418	0.0982265	1.48043	0.138758	0.290291	6459.13	5838.8	7205.56	5943.67	6228.16	5639.45	5823.4	6053.55
ATP5H	3706.75	0.264741	0.108549	2.43891	0.0147315	0.0556728	4046.24	3367.26	4668.6	3773.71	3696.4	3315.18	3372.87	3413.72
ATP5I	2112.75	-0.178791	0.109203	-1.63723	0.101582	0.23181	1982.26	2243.24	2079.65	1982.96	1884.18	1972.98	2490.85	2265.89
ATP5J	1532.49	0.283758	0.118879	2.38694	0.0169891	0.0618987	1683.12	1381.86	1935.35	1551.58	1562.44	1356.56	1293.3	1495.71
ATP5J2	2011.72	0.0254182	0.116229	0.21869	0.826891	0.911324	2029.77	1993.68	2159.23	2077.76	1852.31	1796.23	1914.25	2270.54
ATP5L	5337.21	0.0706439	0.0906448	0.779348	0.435775	0.625685	5468.37	5206.05	5952.46	5115.69	5336.95	5072.75	5155.08	5390.34
ATP5O	3342.43	0.0920831	0.119161	0.772764	0.439662	0.629332	3449.47	3235.39	4075.47	3048.37	3224.58	3264.37	3111.79	3330.01
ATP5S	406.336	-0.317303	0.138114	-2.29739	0.0215964	0.0742081	361.444	451.229	323.619	400.941	359.772	496.007	410.269	447.412
ATP5SL	775.381	-0.485697	0.126166	-3.84967	0.000118278	0.00113112	645.817	904.945	545.377	687.948	704.124	880.44	964.687	869.709
ATP6AP1	5810.07	-0.196985	0.103795	-1.89782	0.0577194	0.155235	5414.01	6206.14	4771.52	5515.76	5954.73	5864.81	6467.53	6286.09
ATP6AP1L	178.602	0.253695	0.160124	1.58437	0.11311	0.250762	194.175	163.03	185.683	208.733	188.109	162.39	159.269	167.431
ATP6AP2	2030.63	0.293008	0.0990592	2.95791	0.00309734	0.0163405	2236.54	1824.71	2448.89	2090.81	2169.94	1806.17	1749.94	1918.01
ATP6V0A1	1296.11	-0.0728962	0.0990949	-0.735619	0.461962	0.648234	1263.21	1329	1148.05	1295.01	1346.57	1325.63	1326.57	1334.79
ATP6V0A2	1270.7	0.128626	0.0917652	1.40168	0.161009	0.322705	1327.39	1214	1299.78	1319.37	1363.02	1220.68	1157.22	1264.1
ATP6V0A4	108.983	-0.251118	0.19889	-1.26259	0.206735	0.383734	99.3639	118.601	91.2499	106.106	100.736	130.354	112.9	112.551
ATP6V0B	1828.57	-0.00467903	0.110076	-0.0425071	0.966094	0.983099	1825.77	1831.37	1635.07	1809.02	2033.22	1697.91	1880.99	1915.22
ATP6V0C	1575.02	-0.345203	0.137393	-2.51252	0.0119872	0.047499	1387.3	1762.74	1110.91	1519.4	1531.6	1590.76	1903.16	1794.3
ATP6V0D1	1715.27	-0.212545	0.136072	-1.56201	0.118286	0.258991	1589.11	1841.43	1297.66	1619.42	1850.25	1687.97	2015.06	1821.27
ATP6V0E1	3653.99	0.225089	0.103781	2.16888	0.0300916	0.0952584	3938.97	3369.01	4389.54	3471.92	3955.43	3314.08	3382.96	3410
ATP6V0E2	892.939	-0.413116	0.147994	-2.79143	0.00524751	0.0247033	765.723	1020.16	592.063	814.927	890.178	1005.27	1089.68	965.516
ATP6V0E2-AS1	76.8795	-0.313934	0.233725	-1.34318	0.179215	0.347353	68.6091	85.1499	63.6627	66.0987	76.066	75.1191	94.755	85.5756
ATP6V1A	3642.19	0.0121129	0.0857282	0.141294	0.887637	0.943315	3657.58	3626.79	3855.84	3573.68	3543.24	3751.53	3444.44	3684.4
ATP6V1B1	75.797	-0.531269	0.263009	-2.01996	0.0433874	0.12552	62.0901	89.5038	55.1743	47.8346	83.2614	95.0035	90.7229	82.7851
ATP6V1B1-AS1	5.91234	-0.368529	0.780329	-0.472274	0.636731	0.786375	5.15727	6.66742	4.24418	6.08804	5.13959	4.41877	9.07229	6.51119
ATP6V1B2	1411.88	0.142334	0.0876412	1.62405	0.104364	0.236162	1481.56	1342.2	1539.58	1468.09	1437.03	1343.31	1333.63	1349.68
ATP6V1C1	3681.19	0.0936118	0.0841083	1.11299	0.265712	0.454799	3800.65	3561.73	3974.67	3647.61	3779.66	3723.92	3442.43	3518.83
ATP6V1C2	215.762	0.668023	0.151477	4.41006	1.03e-05	0.000147832	264.992	166.532	258.895	262.655	273.426	151.343	173.381	174.872
ATP6V1D	1497.4	0.288909	0.0995993	2.90071	0.00372313	0.0188722	1646.98	1347.81	1813.33	1567.24	1560.38	1378.66	1334.63	1330.14
ATP6V1E1	1858.07	0.283443	0.100854	2.81043	0.00494754	0.0235844	2040.36	1675.77	2252.6	1879.46	1989.02	1693.49	1614.87	1718.95
ATP6V1E2	155.28	0.020133	0.188957	0.106548	0.915148	0.95766	156.568	153.992	190.988	134.807	143.909	150.238	158.261	153.478
ATP6V1F	1876.4	-0.323493	0.0931623	-3.47236	0.00051591	0.00383866	1667.04	2085.75	1621.28	1627.25	1752.6	1995.07	2229.77	2032.42
ATP6V1G1	3525.23	0.348812	0.0838415	4.16038	3.18e-05	0.000376147	3949.64	3100.82	4182.64	3763.28	3903.01	3111.92	3038.21	3152.35
ATP6V1G2	25.2265	0.0711266	0.398565	0.178457	0.858364	0.930019	25.857	24.5959	25.4651	24.3522	27.7538	20.9891	33.2651	19.5336
ATP6V1H	1552.42	0.120213	0.101347	1.18616	0.235561	0.419812	1617.37	1487.47	1792.1	1526.36	1533.65	1491.33	1446.53	1524.55
ATP7A	761.721	-0.117556	0.10839	-1.08456	0.278117	0.467941	730.399	793.043	713.022	774.051	704.124	790.96	847.755	740.415
ATP7B	706.37	-0.16006	0.124277	-1.28793	0.197769	0.372566	667.007	745.733	578.269	711.431	711.32	712.526	808.442	716.231
ATP8A1	551.722	0.271771	0.122452	2.21941	0.0264588	0.0862572	603.395	500.05	571.903	668.815	569.467	465.075	527.201	507.873
ATP8A2	92.6817	-0.790807	0.231491	-3.41615	0.000635144	0.0045597	67.9528	117.411	68.9679	60.8804	74.0102	134.772	93.747	123.713
ATP8B1	1527.67	0.16674	0.0945098	1.76426	0.0776874	0.191619	1615.43	1439.9	1595.81	1728.13	1522.35	1492.44	1415.28	1412
ATP8B2	1917.5	-0.24442	0.104208	-2.3455	0.0190013	0.0673179	1755.24	2079.77	1567.16	1881.2	1817.36	1957.51	2182.39	2099.39
ATP8B3	20.7339	-0.514166	0.472455	-1.08829	0.276469	0.466421	17.0464	24.4214	9.5494	20.0036	21.5863	17.6751	33.2651	22.3241
ATP8B4	5.66805	2.84219	1.03844	2.73699	0.00620041	0.0282633	9.8954	1.4407	13.7936	8.6972	7.19543	3.31408	1.00803	0
ATP8B5P	1.85185	-0.893503	1.60492	-0.556728	0.577713	NA	1.28718	2.41651	2.12209	1.73944	0	2.20938	5.04016	0
ATP9A	19668.4	0.0460691	0.0918597	0.501516	0.616008	0.771551	19982	19354.8	18047.3	21561.2	20337.4	18993	19960	19111.3
ATP9B	161.596	-0.649923	0.245884	-2.64321	0.00821234	0.0353968	125.748	197.443	83.8225	133.067	160.355	160.18	247.976	184.174
ATPAF1	1456.05	0.0945544	0.110496	0.855724	0.39215	0.587108	1504.14	1407.95	1702.98	1361.11	1448.34	1416.22	1353.79	1453.86
ATPAF2	455.111	-0.12898	0.146289	-0.881682	0.377949	0.573339	434.825	475.398	367.122	458.342	479.01	430.83	458.655	536.708
ATPIF1	1860.62	0.0110025	0.0959814	0.114632	0.908737	0.954943	1868.09	1853.15	2037.21	1762.05	1805.03	1843.73	1802.36	1913.36
ATR	2438.31	0.200018	0.0907198	2.20479	0.0274686	0.088858	2606.76	2269.87	2622.9	2739.62	2457.75	2368.46	2150.13	2291.01
ATRAID	3214.55	0.155586	0.100128	1.55387	0.120217	0.261768	3388.3	3040.79	3713.66	3068.37	3382.88	2921.91	2997.89	3202.58
ATRIP	450.33	0.0824232	0.138382	0.595619	0.55143	0.721511	462.937	437.723	444.578	448.775	495.457	510.368	410.269	392.532
ATRN	1841.99	-0.185382	0.091745	-2.02062	0.0433194	0.125456	1723.46	1960.53	1632.95	1761.18	1776.24	2077.93	1893.08	1910.57
ATRNL1	370.94	-0.0329797	0.131696	-0.250423	0.80226	0.895982	366.559	375.321	394.709	373.98	330.99	401.003	365.916	359.046
ATRX	3930.18	-0.0833281	0.0950912	-0.876297	0.380869	0.57656	3816.56	4043.79	4091.39	3925.05	3433.25	4166.9	3954.51	4009.96
ATXN1	375.734	0.0728888	0.12912	0.564502	0.572412	0.737467	385.034	366.434	381.976	417.466	355.66	356.816	388.092	354.395
ATXN10	2822.07	0.178524	0.107749	1.65684	0.097551	0.225077	2996.79	2647.36	3428.24	2717.87	2844.25	2702.08	2581.57	2658.43
ATXN1L	3431.63	0.121302	0.0993076	1.22148	0.221904	0.402592	3575.59	3287.66	3208.6	3837.2	3680.98	3121.86	3446.46	3294.66
ATXN2	1252.09	-0.0758764	0.103925	-0.73011	0.465323	0.650855	1218.86	1285.32	1087.57	1309.8	1259.2	1280.34	1276.17	1299.45
ATXN2L	4506.9	-0.248517	0.141205	-1.75997	0.0784131	0.192632	4119.47	4894.32	3230.88	4483.41	4644.14	4469.58	5468.57	4744.8
ATXN3	1164.77	0.317125	0.104899	3.02314	0.0025017	0.0138181	1292.45	1037.09	1419.68	1243.7	1213.97	1061.61	981.823	1067.84
ATXN7	5030.57	0.427136	0.0811692	5.26229	1.42e-07	3.74e-06	5769.54	4291.6	5548.2	6108.91	5651.5	4332.6	4220.63	4321.57
ATXN7L1	223.899	0.614187	0.163416	3.75842	0.00017099	0.00154209	270.883	176.914	232.369	285.268	295.013	159.076	187.494	184.174
ATXN7L2	419.93	-0.597934	0.207221	-2.88549	0.0039081	0.0195292	333.901	505.959	212.209	389.634	399.86	467.285	571.554	479.038
ATXN7L3	1721.24	-0.284384	0.112754	-2.52216	0.0116636	0.0464659	1552.06	1890.42	1348.59	1595.07	1712.51	1785.18	1996.91	1889.18
ATXN7L3B	6600.26	0.0700663	0.0742614	0.943509	0.34542	0.542639	6760.62	6439.9	6877.69	6616.83	6787.35	6549.72	6282.05	6487.94
AUH	338.425	0.23746	0.147154	1.61368	0.106598	0.239887	366.273	310.578	412.746	359.194	326.878	329.198	274.185	328.35
AUNIP	345.476	0.119949	0.134573	0.891333	0.372751	0.568261	359.942	331.01	376.671	321.796	381.358	349.083	328.618	315.328
AUP1	2797.89	-0.0728287	0.0949449	-0.767063	0.443044	0.631781	2727.41	2868.36	2521.04	2732.66	2928.54	2706.5	2931.36	2967.24
AURKA	5879.48	-0.0973426	0.0896609	-1.08567	0.277623	0.467555	5681.61	6077.35	6186.95	5425.31	5432.55	6022.78	5911.1	6298.18
AURKAIP1	819.418	-0.823532	0.182238	-4.51898	6.21e-06	9.54e-05	591.524	1047.31	426.54	664.466	683.566	866.079	1236.86	1039
AURKAPS1	10.4492	0.212819	0.62036	0.343058	0.731555	0.851926	11.1953	9.70315	9.5494	14.7852	9.25127	11.0469	5.04016	13.0224
AURKB	1681.24	-0.20379	0.100982	-2.01808	0.0435832	0.125969	1562.75	1799.73	1502.44	1608.98	1576.83	1631.63	1955.58	1811.97
AUTS2	1258.75	-0.087102	0.0934958	-0.931614	0.351536	0.548747	1220.74	1296.77	1194.74	1257.61	1209.86	1230.63	1364.88	1294.8
AVEN	256.521	0.0729112	0.174434	0.417987	0.675957	0.814686	263.27	249.773	296.032	263.525	230.254	209.891	239.912	299.515
AVIL	77.0298	-0.497866	0.262199	-1.89881	0.0575893	0.15502	63.7824	90.2773	45.6249	74.7959	70.9264	86.166	78.6265	106.039
AVL9	4812.78	0.131977	0.081964	1.61018	0.107358	0.241143	5032.55	4593.01	5072.86	5145.26	4879.53	4778.9	4344.62	4655.5
AVPI1	494.497	0.0428662	0.130184	0.329275	0.741948	0.858873	502.13	486.865	568.72	456.603	481.066	463.971	523.169	473.457
AVPR1A	3.27578	0.248642	1.10396	0.225228	0.821802	NA	3.56058	2.99099	5.30522	4.3486	1.02792	3.31408	1.00803	4.65085
AVPR2	4.8755	-2.02871	1.04528	-1.94082	0.0522799	NA	1.90868	7.84231	1.06104	2.60916	2.05584	6.62815	2.01606	14.8827
AXDND1	7.07297	0.424758	0.760903	0.558229	0.576688	0.740897	8.10491	6.04104	6.36627	8.6972	9.25127	3.31408	11.0884	3.72068
AXIN1	1125.96	-0.542559	0.170347	-3.18501	0.00144748	0.00893646	916.528	1335.4	718.327	1028.01	1003.25	1106.9	1649.14	1250.15
AXIN2	38.9031	0.573519	0.319011	1.7978	0.0722084	0.182339	46.4596	31.3466	42.4418	54.7924	42.1447	30.9314	34.2731	28.8353
AXL	44.2031	1.2693	0.309221	4.10483	4.05e-05	0.000462102	62.5388	25.8675	67.9069	53.9226	65.7868	26.5126	23.1847	27.9051
AZGP1	9.30426	-0.105454	0.65278	-0.161546	0.871663	0.935557	9.03425	9.57427	9.5494	5.21832	12.335	6.62815	9.07229	13.0224
AZGP1P1	9.89064	-0.995419	0.78232	-1.27239	0.203233	0.378816	6.62225	13.159	3.18313	4.3486	12.335	18.7798	3.0241	17.6732
AZI2	1915.31	0.99738	0.100155	9.95841	2.32e-23	2.02e-21	2552.11	1278.52	2727.95	2421.3	2507.09	1381.97	1189.48	1264.1
AZIN1	6557.62	0.0571546	0.0911712	0.626893	0.530729	0.704778	6687.41	6427.83	7043.22	6547.25	6471.78	6928.63	5965.53	6389.34
AZIN1-AS1	48.1148	0.00554527	0.313304	0.0176993	0.985879	0.991822	48.2852	47.9444	45.6249	47.8346	51.3959	32.0361	62.498	49.299
AZIN2	30.8763	0.930586	0.359548	2.58821	0.00964752	0.0402525	40.4326	21.3199	38.1976	46.0952	37.0051	22.0938	24.1928	17.6732
AZU1	1.9863	-3.38906	1.69283	-2.00201	0.0452835	NA	0.289907	3.6827	0	0.86972	0	2.20938	6.04819	2.79051
B2M	15303.4	2.94621	0.0997646	29.5316	1.13e-191	3.81e-189	27091.4	3515.34	29853.6	24599.2	26821.5	3750.43	3368.84	3426.75
B3GALNT1	1786.1	0.330597	0.0907291	3.64379	0.000268656	0.00223949	1990	1582.21	2118.91	1895.99	1955.1	1628.32	1546.32	1571.99
B3GALNT2	826.245	0.200886	0.109117	1.84101	0.0656195	0.170428	883.809	768.681	881.728	917.554	852.145	736.83	722.759	846.455
B3GALT2	3.23821	-0.832642	1.26433	-0.658565	0.510175	NA	2.36783	4.1086	2.12209	0.86972	4.11168	0	3.0241	9.3017
B3GALT4	23.6293	-0.722968	0.418834	-1.72614	0.0843215	0.203096	17.8176	29.441	12.7325	19.1338	21.5863	23.1985	36.2891	28.8353
B3GALT5	8.1072	-0.328501	0.708666	-0.463548	0.642972	0.790648	7.20207	9.01233	3.18313	6.08804	12.335	7.73284	9.07229	10.2319
B3GALT6	370.796	-0.14433	0.179298	-0.804977	0.420833	0.612465	352.41	389.182	334.229	342.67	380.33	299.372	497.968	370.208
B3GAT1	4.66936	-1.12308	0.932568	-1.20429	0.228478	NA	2.9366	6.40211	1.06104	2.60916	5.13959	7.73284	4.03213	7.44136
B3GAT3	679.888	-0.792042	0.199472	-3.97069	7.17e-05	0.000746518	497.723	862.053	360.755	544.445	587.97	662.815	1080.61	842.734
B3GLCT	218.007	-0.057523	0.170728	-0.336928	0.736171	0.85486	213.617	222.398	242.979	197.426	200.444	247.451	231.847	187.894
B3GNT2	980.824	0.44208	0.111608	3.96101	7.46e-05	0.0007703	1130.21	831.443	1273.25	1046.27	1071.09	836.252	813.482	844.594
B3GNT3	211.843	0.11914	0.163016	0.730853	0.464869	0.650408	220.257	203.429	197.354	249.61	213.807	216.52	208.663	185.104
B3GNT4	129.451	-0.189485	0.22145	-0.855657	0.392187	0.587108	120.897	138.005	91.2499	129.588	141.853	120.411	164.309	129.294
B3GNT5	5.53639	1.91269	1.01031	1.89318	0.0583341	0.156513	8.78603	2.28674	8.48836	3.47888	14.3909	2.20938	0	4.65085
B3GNT6	32.053	-0.354808	0.385769	-0.919744	0.357707	0.554584	28.0504	36.0556	15.9157	37.398	30.8376	32.0361	34.2731	41.8576
B3GNT7	15.6464	-0.352773	0.504511	-0.699239	0.484403	0.66636	13.7459	17.5469	19.0988	13.9155	8.22335	17.6751	19.1526	15.8129
B3GNT8	15.6292	-1.84772	0.592202	-3.12008	0.00180799	0.010674	6.79813	24.4603	7.42731	7.82748	5.13959	11.0469	36.2891	26.0448
B3GNT9	51.2971	-0.397554	0.286068	-1.38972	0.164614	0.327456	44.2552	58.3389	50.9302	41.7466	40.0888	64.0721	63.506	47.4387
B3GNTL1	73.0275	-0.822978	0.298846	-2.75386	0.00588976	0.0271181	52.7486	93.3063	54.1133	54.7924	49.3401	68.4909	136.084	75.3438
B4GALNT1	444.102	-0.357692	0.178784	-2.0007	0.0454252	0.129938	389.154	499.05	299.215	408.768	459.48	478.332	593.731	425.088
B4GALNT3	353.32	-0.745768	0.172532	-4.32249	1.54e-05	0.000206076	263.466	443.173	211.148	330.494	248.756	460.657	470.751	398.113
B4GALNT4	768.145	-0.327584	0.19243	-1.70235	0.0886891	0.210852	681.129	855.16	481.714	778.399	783.274	725.783	1057.43	782.273
B4GALT1	4277.07	-0.113409	0.0771965	-1.46909	0.141808	0.294921	4109.09	4445.04	4000.14	4097.25	4229.89	4359.12	4538.16	4437.84
B4GALT1-AS1	8.53989	-0.293422	0.738122	-0.397525	0.69098	0.824673	7.7189	9.36088	14.8546	5.21832	3.08376	9.94223	6.04819	12.0922
B4GALT2	946.244	-0.348348	0.123357	-2.82391	0.00474412	0.0228038	832.356	1060.13	714.083	901.03	881.954	978.757	1143.11	1058.53
B4GALT3	1293.55	-0.0883832	0.105713	-0.836066	0.403118	0.59651	1254.19	1332.91	1331.61	1232.39	1198.55	1330.05	1216.69	1452
B4GALT4	731.419	0.237332	0.105382	2.25212	0.0243149	0.0808986	791.717	671.122	825.493	731.434	818.223	668.339	674.373	670.653
B4GALT4-AS1	2.94119	-2.37213	1.31033	-1.81032	0.0702457	NA	0.933495	4.94888	1.06104	1.73944	0	2.20938	7.05622	5.58102
B4GALT5	1510.73	-0.0943006	0.0905253	-1.0417	0.297549	0.490625	1461.2	1560.26	1388.91	1523.75	1470.95	1556.51	1515.07	1609.19
B4GALT6	156.213	0.0114882	0.187003	0.0614334	0.951014	0.976171	156.924	155.503	164.462	169.595	136.713	134.772	152.213	179.523
B4GALT7	500.539	-0.630943	0.166364	-3.79255	0.000149108	0.00137266	392.576	608.503	301.337	426.163	450.228	573.335	700.582	551.591
B4GAT1	437.982	-0.230583	0.116532	-1.97871	0.0478491	0.134834	403.226	472.738	405.319	398.332	406.028	452.924	466.719	498.571
B9D1	472.756	-0.43975	0.136804	-3.21446	0.00130692	0.00823405	400.896	544.616	338.473	436.599	427.614	560.079	570.546	503.222
B9D2	33.8027	-0.551649	0.369968	-1.49107	0.135943	0.286175	27.4912	40.1142	25.4651	20.0036	37.0051	36.4548	50.4016	33.4861
BAALC	3.46786	1.63459	1.09076	1.49857	0.133985	NA	5.24313	1.69259	7.42731	5.21832	3.08376	2.20938	1.00803	1.86034
BAAT	2.53073	-1.02567	1.19515	-0.858196	0.390784	NA	1.68255	3.3789	2.12209	0.86972	2.05584	3.31408	4.03213	2.79051
BABAM1	1212.05	-0.30388	0.103832	-2.92663	0.00342651	0.0176687	1085.03	1339.08	1052.56	1092.37	1110.15	1209.64	1449.55	1358.05
BACE1	1665.54	0.00798921	0.0884307	0.0903444	0.928014	0.964168	1669.98	1661.1	1574.59	1729	1706.35	1640.47	1671.32	1671.52
BACE1-AS	28.7623	-0.158458	0.366	-0.432945	0.665055	0.806982	27.1994	30.3251	32.8924	26.0916	22.6142	33.1408	26.2088	31.6258
BACE2	1356.34	0.353334	0.0933644	3.78446	0.000154044	0.00140891	1521.7	1190.98	1448.33	1542.01	1574.77	1131.2	1228.79	1212.94
BACH1	448.349	0.275369	0.115176	2.39085	0.0168092	0.0614595	490.816	405.881	479.592	503.568	489.289	416.469	413.293	387.881
BACH1-IT2	2.25587	-0.232153	1.36003	-0.170697	0.864462	NA	2.08896	2.42278	3.18313	0	3.08376	3.31408	3.0241	0.93017
BACH2	25.1865	0.519888	0.389855	1.33354	0.182355	0.352161	29.7382	20.6349	28.6482	28.7008	31.8655	15.4657	23.1847	23.2542
BAD	329.136	-0.712024	0.182929	-3.89235	9.93e-05	0.000979584	249.3	408.972	204.782	274.831	268.287	382.223	507.04	337.652
BAG1	5028.33	0.206507	0.0927937	2.22544	0.0260514	0.0853411	5387.86	4668.81	5955.64	5099.17	5108.76	4696.05	4688.36	4622.01
BAG2	151.856	0.236767	0.188871	1.25359	0.209991	0.387686	164.077	139.635	165.523	181.771	144.937	161.285	119.956	137.665
BAG3	3223.04	0.316405	0.0847833	3.73193	0.00019002	0.00168147	3575.27	2870.82	3490.84	3495.4	3739.57	2752.89	3003.94	2855.62
BAG4	524.593	-0.0305626	0.124504	-0.245475	0.806089	0.89822	519.12	530.066	560.232	480.085	517.043	578.859	484.863	526.476
BAG5	2816	0.0356749	0.082465	0.432606	0.665301	0.806982	2850.57	2781.43	2905.14	2931.83	2714.73	2830.22	2794.26	2719.82
BAG6	4962.53	-0.351216	0.130524	-2.69082	0.00712768	0.0316715	4361.32	5563.73	3541.77	4599.95	4942.23	5078.27	6054.24	5558.7
BAGE	50.0681	0.371305	0.279931	1.32641	0.184703	0.355483	56.4632	43.673	61.5406	51.3135	56.5355	48.6065	43.3454	39.0671
BAHCC1	501.401	-0.623023	0.191136	-3.25957	0.0011158	0.00720796	394.534	608.268	297.093	472.258	414.251	510.368	760.056	554.381
BAHD1	1216.84	-0.298497	0.115304	-2.58877	0.0096318	0.040213	1091.27	1342.41	981.466	1129.77	1162.58	1257.14	1493.9	1276.19
BAIAP2	614.415	-0.581512	0.154448	-3.76511	0.000166476	0.00150487	492.077	736.753	403.197	526.181	546.853	660.606	866.907	682.745
BAIAP2-AS1	650.614	-0.448477	0.124726	-3.59568	0.000323541	0.00262365	550.213	751.016	478.531	563.578	608.528	710.317	801.385	741.345
BAIAP2L1	1159.99	-0.0889146	0.0928135	-0.957992	0.338067	0.534985	1124.16	1195.82	1166.09	1133.24	1073.15	1212.95	1213.67	1160.85
BAIAP2L2	53.9113	-0.807056	0.313707	-2.57264	0.0100926	0.0415526	39.2308	68.5919	26.5261	35.6585	55.5076	62.9674	78.6265	64.1817
BAIAP3	309.557	-1.13382	0.237932	-4.7653	1.89e-06	3.47e-05	193.51	425.604	129.447	249.61	201.472	357.92	564.498	354.395
BAK1	1229.27	0.151255	0.109658	1.37934	0.16779	0.331586	1293.45	1165.1	1140.62	1315.02	1424.7	1196.38	1162.26	1136.67
BAMBI	3190.76	0.331486	0.0928526	3.57002	0.000356949	0.00284697	3556.07	2825.45	3864.33	3265.8	3538.1	2836.85	2840.63	2798.88
BANF1	4309.24	-0.0210032	0.0942911	-0.222748	0.823732	0.909133	4278.28	4340.19	4127.46	4182.48	4524.9	3966.95	4423.24	4630.39
BANK1	2.94609	1.65184	1.37294	1.20314	0.228921	NA	4.41926	1.47292	4.24418	6.95776	2.05584	4.41877	0	0
BANP	221.114	-0.5627	0.168485	-3.33977	0.000838486	0.00571799	178.135	264.093	153.851	207.863	172.69	285.011	269.145	238.124
BAP1	1190.46	-0.364942	0.135384	-2.69561	0.00702603	0.0313095	1040.43	1340.48	873.24	1135.85	1112.21	1236.15	1534.22	1251.08
BARD1	1072.81	0.394598	0.0920188	4.28823	1.8e-05	0.000234119	1218.53	927.087	1200.04	1204.56	1250.98	942.302	939.486	899.474
BARX1	2.87406	4.95473	1.56792	3.16006	0.00157735	NA	5.74813	0	5.30522	7.82748	4.11168	0	0	0
BARX2	26.9407	0.142984	0.382937	0.373387	0.708861	0.835972	28.3369	25.5444	30.7703	29.5705	24.6701	19.8845	24.1928	32.5559
BASP1	2821.6	-0.0349216	0.0895279	-0.390064	0.696489	0.828813	2787.61	2855.59	3014.43	2723.09	2625.3	2887.67	2823.5	2855.62
BATF	329.868	-0.291784	0.160783	-1.81476	0.0695602	0.177427	296.409	363.327	238.735	340.06	310.432	329.198	396.157	364.627
BATF2	678.855	5.08849	0.188734	26.9612	4.21e-160	1.28e-157	1318.81	38.8999	1182	1321.97	1452.45	36.4548	51.4096	28.8353
BATF3	2.7286	-0.527962	1.42003	-0.371795	0.710045	NA	2.24028	3.21691	0	2.60916	4.11168	2.20938	0	7.44136
BAX	1298.14	-0.488672	0.117332	-4.16488	3.12e-05	0.000371077	1080.38	1515.91	940.086	1070.63	1230.42	1448.25	1579.59	1519.9
BAZ1A	4318.44	0.654593	0.0924264	7.08232	1.42e-12	7.54e-11	5281.73	3355.16	5728.58	5109.6	5006.99	3501.87	3183.36	3380.24
BAZ1B	5064.15	0.124483	0.0827404	1.5045	0.132451	0.280721	5282.14	4846.17	5275.51	5527.94	5042.97	5023.03	4658.12	4857.35
BAZ2A	6591.4	0.0695746	0.103357	0.673146	0.500854	0.679406	6750.05	6432.75	5872.88	7308.26	7069	6175.23	6601.6	6521.42
BAZ2B	1019.2	-0.0433422	0.108347	-0.400031	0.689134	0.823216	1003.85	1034.56	1017.54	1080.19	913.82	986.49	1013.07	1104.11
BBC3	124.8	-0.924485	0.20528	-4.50354	6.68e-06	0.000101497	86.2712	163.329	81.7005	77.4051	99.7081	142.505	187.494	159.989
BBIP1	286.955	0.00613237	0.146096	0.0419749	0.966519	0.983099	287.749	286.16	325.741	254.828	282.678	298.267	280.233	279.981
BBOX1-AS1	19.1407	-0.819601	0.453915	-1.80562	0.070977	0.180123	13.7893	24.4921	10.6104	17.3944	13.3629	20.9891	29.2329	23.2542
BBS1	505.745	-0.284764	0.150614	-1.89069	0.0586661	0.157074	455.75	555.739	387.281	512.265	467.703	503.74	648.165	515.314
BBS10	668.691	0.0312482	0.103777	0.301108	0.763332	0.873069	675.752	661.63	666.336	678.381	682.538	698.165	642.116	644.608
BBS12	49.3351	0.303113	0.322008	0.941322	0.34654	0.54382	54.6497	44.0205	72.151	43.486	48.3122	41.9783	34.2731	55.8102
BBS2	1451.85	0.185666	0.0858258	2.16329	0.0305185	0.096374	1545.13	1358.57	1574.59	1522.01	1538.79	1379.76	1364.88	1331.07
BBS4	780.704	0.117052	0.0989802	1.18258	0.236976	0.421317	812.178	749.23	813.821	838.41	784.302	754.505	762.072	731.114
BBS5	533.852	-0.203858	0.150099	-1.35815	0.174416	0.340431	495.97	571.735	432.906	568.797	486.206	503.74	667.317	544.149
BBS7	329.862	0.121645	0.133965	0.90804	0.363857	0.56026	343.649	316.075	358.633	355.715	316.599	313.733	338.699	295.794
BBS9	291.235	0.0818212	0.136712	0.598494	0.549511	0.720108	299.402	283.068	290.726	316.578	290.901	268.44	305.434	275.33
BBX	3060.24	0.383694	0.0915225	4.19235	2.76e-05	0.000335293	3464.34	2656.14	3304.09	3761.54	3327.37	2741.85	2576.53	2650.05
BCAM	2181.44	-0.794567	0.164726	-4.82356	1.41e-06	2.7e-05	1595.26	2767.61	1205.35	1773.36	1807.08	2337.53	3277.11	2688.19
BCAN	5.16567	0.128229	0.937569	0.136768	0.891214	NA	5.45406	4.87728	7.42731	1.73944	7.19543	3.31408	2.01606	9.3017
BCAP29	1391.57	0.28116	0.11157	2.52003	0.0117345	0.0466882	1526.61	1256.53	1691.31	1502.88	1385.63	1364.29	1202.58	1202.71
BCAP31	11371.5	0.198333	0.0828089	2.39507	0.0166173	0.0609301	12152.1	10590.9	11651.3	11934.3	12870.6	10149.9	11017.8	10604.9
BCAR1	373.141	-1.06436	0.238667	-4.4596	8.21e-06	0.00012184	241.105	505.176	144.302	314.839	264.175	429.725	630.02	455.783
BCAR3	336.617	-0.122467	0.126991	-0.964378	0.334857	0.532184	322.17	351.064	305.581	339.191	321.739	349.083	360.875	343.233
BCAS1	1127.42	0.36547	0.092337	3.958	7.56e-05	0.000775854	1269.61	985.23	1324.18	1259.35	1225.28	968.815	987.871	999.003
BCAS2	13554.7	0.244296	0.098061	2.49126	0.012729	0.0498027	14699.9	12409.6	16350.7	13860.7	13888.2	12871.9	11638.7	12718.2
BCAS3	3326.56	-0.2805	0.0803156	-3.49247	0.000478569	0.00360226	3004.31	3648.8	2928.48	2977.05	3107.4	3538.33	3747.86	3660.22
BCAS4	268.902	-0.627452	0.145758	-4.30475	1.67e-05	0.000220078	211.232	326.572	196.293	228.736	208.668	297.162	346.763	335.791
BCAT2	1208.68	-0.726536	0.155527	-4.67146	2.99e-06	5.25e-05	910.491	1506.88	733.182	954.952	1043.34	1322.32	1799.34	1398.98
BCCIP	1967.44	0.202943	0.124943	1.62428	0.104316	0.236086	2105.78	1829.09	2462.68	1938.61	1916.04	1951.99	1646.12	1889.18
BCDIN3D	205.817	0.349532	0.186287	1.87631	0.0606126	0.16065	230.901	180.733	285.421	185.25	222.03	171.227	190.518	180.453
BCDIN3D-AS1	64.6214	-0.356826	0.292547	-1.21972	0.22257	0.403517	56.5624	72.6803	38.1976	73.9262	57.5635	59.6534	75.6024	82.7851
BCKDHA	1500.23	-0.728612	0.16778	-4.34266	1.41e-05	0.000191147	1129.08	1871.39	818.066	1218.48	1350.69	1679.13	2124.93	1810.11
BCKDHB	479.783	0.0942307	0.120214	0.78386	0.433122	0.623079	495.602	463.965	544.316	480.955	461.536	463.971	452.606	475.317
BCKDK	1692.98	-0.314765	0.166711	-1.88809	0.0590133	0.157514	1508.87	1877.1	1073.78	1627.25	1825.58	1742.1	2037.23	1851.97
BCL10	324.423	0.46816	0.134289	3.4862	0.000489931	0.00367176	376.602	272.243	407.441	368.761	353.604	287.22	256.04	273.47
BCL11A	10.0037	0.126804	0.617235	0.205439	0.837229	0.917117	10.4004	9.60699	11.6715	11.3064	8.22335	12.1516	11.0884	5.58102
BCL11B	138.842	-0.0783639	0.178022	-0.440193	0.659797	0.803384	135.077	142.608	124.142	133.067	148.02	143.61	139.108	145.107
BCL2	1117.89	-0.205558	0.0991138	-2.07396	0.0380828	0.113967	1038.05	1197.74	1038.76	1090.63	984.746	1268.19	1139.08	1185.97
BCL2L1	823.692	-0.0907579	0.126493	-0.717494	0.473069	0.657754	797.633	849.751	674.824	811.449	906.624	850.613	881.02	817.619
BCL2L11	1129.22	0.31252	0.0969176	3.22459	0.00126152	0.00799837	1250.92	1007.52	1172.45	1275.88	1304.43	992.014	1047.35	983.19
BCL2L12	872.776	-0.444821	0.126874	-3.506	0.000454896	0.0034627	739.072	1006.48	659.97	780.139	777.107	945.616	1150.16	923.659
BCL2L13	1494.72	0.41277	0.0904168	4.56519	4.99e-06	8.02e-05	1707.16	1282.29	1619.15	1716.83	1785.5	1252.72	1287.26	1306.89
BCL2L14	23.1999	4.02611	0.631589	6.37457	1.83e-10	7.84e-09	43.7315	2.6684	36.0755	47.8346	47.2843	1.10469	5.04016	1.86034
BCL2L15	85.9818	0.0919511	0.243951	0.376924	0.70623	0.834822	88.7147	83.249	98.6772	73.9262	93.5406	103.841	70.5622	75.3438
BCL2L2	1398.79	0.0759844	0.0881044	0.862436	0.388447	0.583603	1435.88	1361.69	1483.34	1381.12	1443.2	1348.83	1356.81	1379.44
BCL3	191.318	-0.666241	0.212301	-3.13819	0.00169994	0.0101324	147.77	234.867	102.921	168.726	171.662	201.054	269.145	234.403
BCL6	1329.58	0.156598	0.0981277	1.59586	0.11052	0.24657	1401.75	1257.41	1361.32	1420.25	1423.67	1168.76	1359.84	1243.64
BCL7A	1063.42	-0.0261608	0.107553	-0.243236	0.807822	0.898817	1053.57	1073.27	934.78	1110.63	1115.29	1047.25	1103.79	1068.77
BCL7B	1115.15	-0.129995	0.103607	-1.25469	0.20959	0.387268	1065.17	1165.14	1036.64	1027.14	1131.74	1085.91	1257.02	1152.48
BCL7C	213.873	-0.691801	0.244747	-2.82659	0.00470462	0.022649	163.578	264.168	125.203	177.423	188.109	169.018	340.715	282.772
BCL9	1349.67	-0.421217	0.119248	-3.53227	0.000412012	0.00319742	1153.89	1545.45	986.772	1228.04	1246.87	1421.74	1624.95	1589.66
BCL9L	3511.34	-0.625075	0.170764	-3.66045	0.000251773	0.00212726	2762.03	4260.65	2013.86	3272.76	2999.47	3697.4	5064.35	4020.19
BCLAF1	7862.57	0.196829	0.0926494	2.12445	0.0336325	0.103738	8397.98	7327.17	8822.59	8371.05	8000.29	7852.15	6708.45	7420.9
BCO1	7.72403	0.463555	0.753904	0.614873	0.538639	0.711084	8.94839	6.49966	6.36627	6.08804	14.3909	6.62815	10.0803	2.79051
BCO2	12.6295	-0.507461	0.568112	-0.893241	0.371728	0.567427	10.42	14.8391	8.48836	10.4366	12.335	18.7798	8.06426	17.6732
BCOR	1684.24	-0.0410944	0.102228	-0.401989	0.687692	0.822317	1660.08	1708.41	1537.45	1699.43	1743.35	1658.14	1858.81	1608.26
BCORL1	324.408	-0.0685237	0.161045	-0.425495	0.670476	0.810409	316.592	332.225	248.284	336.582	364.911	318.151	342.731	335.791
BCR	963.901	-0.56118	0.125465	-4.4728	7.72e-06	0.000114995	778.625	1149.18	676.947	808.839	850.089	1064.92	1282.22	1100.39
BCRP2	21.0795	-0.623795	0.438363	-1.42301	0.154733	0.314101	16.5108	25.6483	13.7936	18.2641	17.4746	33.1408	25.2008	18.6034
BCRP3	2.07912	-1.84116	1.55748	-1.18214	0.23715	NA	0.86972	3.28851	0	2.60916	0	1.10469	5.04016	3.72068
BCS1L	852.703	-0.226127	0.12627	-1.79083	0.0733209	0.184443	786.127	919.278	688.618	777.53	892.234	835.147	975.775	946.913
BCYRN1	1369.29	-0.35859	0.158707	-2.25945	0.0238554	0.079849	1200.17	1538.41	1288.11	1301.97	1010.44	1219.58	1524.14	1871.5
BDH1	1162.74	-0.621381	0.125082	-4.9678	6.77e-07	1.44e-05	916.12	1409.37	797.906	907.118	1043.34	1327.84	1553.38	1346.89
BDH2	159.257	0.335668	0.179615	1.86883	0.061647	0.162697	177.945	140.568	196.293	161.768	175.774	121.516	153.221	146.967
BDKRB1	6.09737	0.369166	0.764507	0.482881	0.62918	0.780803	6.90359	5.29115	7.42731	6.08804	7.19543	3.31408	6.04819	6.51119
BDKRB2	215.462	0.190264	0.163015	1.16716	0.243145	0.428848	229.645	201.279	228.125	213.081	247.728	202.159	226.807	174.872
BDNF	2.30359	0.772844	1.34363	0.575193	0.565161	NA	2.89491	1.71227	2.12209	3.47888	3.08376	1.10469	4.03213	0
BDNF-AS	21.8805	0.333041	0.425067	0.783502	0.433332	0.623159	24.3147	19.4462	19.0988	26.0916	27.7538	24.3032	19.1526	14.8827
BDP1	2685.72	0.113509	0.0905143	1.25405	0.209825	0.387563	2790.95	2580.49	2731.13	3020.54	2621.19	2592.71	2544.27	2604.48
BEAN1	11.747	0.209249	0.571358	0.366231	0.714192	0.839453	12.5242	10.9698	10.6104	15.655	11.3071	15.4657	9.07229	8.37153
BECN1	619.43	-0.00181646	0.112453	-0.0161531	0.987112	0.992548	619.241	619.619	635.566	599.237	622.919	625.256	568.53	665.072
BEGAIN	67.7311	-0.728491	0.305049	-2.38811	0.0169353	0.0617751	50.8604	84.6019	29.7093	59.1409	63.731	78.4331	102.819	72.5533
BEND3	494.983	-0.0546595	0.120928	-0.451999	0.65127	0.797063	485.587	504.379	445.639	499.219	511.904	471.704	537.281	504.152
BEND3P3	339.057	-0.638672	0.179534	-3.55739	0.000374554	0.00295549	264.812	413.302	203.721	329.624	261.091	389.956	466.719	383.23
BEND6	31.1622	-0.0620056	0.348144	-0.178104	0.858642	0.930128	30.4803	31.8441	26.5261	33.0494	31.8655	27.6173	36.2891	31.6258
BEND7	180.636	0.145787	0.173776	0.838936	0.401505	0.595258	189.612	171.66	167.645	190.469	210.723	193.321	154.229	167.431
BEST1	12.1287	-0.468622	0.608477	-0.770157	0.441207	0.630555	10.2049	14.0525	10.6104	8.6972	11.3071	7.73284	24.1928	10.2319
BEST2	5.64044	-0.214548	0.780429	-0.27491	0.783385	0.885509	5.22105	6.05983	5.30522	5.21832	5.13959	6.62815	5.04016	6.51119
BET1	628.443	0.516712	0.114333	4.51938	6.2e-06	9.53e-05	739.985	516.901	803.211	687.948	728.794	532.462	489.903	528.337
BET1L	1029.1	-0.0238839	0.128672	-0.185619	0.852743	0.926202	1020.43	1037.76	840.347	1053.23	1167.72	1029.57	1049.36	1034.35
BEX2	42.4772	0.543065	0.327718	1.65711	0.0974967	0.224985	50.4804	34.474	61.5406	42.6163	47.2843	26.5126	44.3534	32.5559
BEX4	27.614	0.449419	0.441152	1.01874	0.308327	0.502841	31.9972	23.2308	45.6249	22.6127	27.7538	22.0938	14.1124	33.4861
BEX5	83.1896	0.428235	0.230215	1.86016	0.0628635	0.1652	95.5017	70.8774	105.043	81.7537	99.7081	78.4331	63.506	70.6929
BFAR	1765.12	0.193231	0.0835198	2.3136	0.0206897	0.0718239	1883.19	1647.05	1860.01	1906.43	1883.15	1629.42	1617.89	1693.84
BFSP1	49.9168	-0.690812	0.310709	-2.22334	0.0261929	0.0856233	38.1346	61.6989	27.5872	42.6163	44.2005	50.8158	76.6104	57.6705
BFSP2	63.6439	-0.433527	0.262461	-1.65178	0.0985793	0.226808	54.1616	73.1261	65.7848	50.4438	46.2564	82.8519	69.5542	66.9722
BGLAP	4.68034	-2.64922	1.1119	-2.38261	0.0171902	NA	1.26509	8.09559	0	1.73944	2.05584	5.52346	14.1124	4.65085
BHLHB9	91.5758	0.0846543	0.279222	0.303179	0.761753	0.872044	94.3225	88.8291	108.227	79.1445	95.5965	76.2238	127.012	63.2516
BHLHE40	6177.09	0.468979	0.0861123	5.44613	5.15e-08	1.5e-06	7172.58	5181.61	6842.68	6970.8	7704.25	4989.89	5314.34	5240.58
BHLHE40-AS1	19.2669	0.176311	0.479465	0.367724	0.713079	0.838716	20.374	18.1598	12.7325	27.831	20.5584	20.9891	12.0964	21.3939
BHLHE41	376.04	0.293101	0.124788	2.3488	0.0188341	0.0669548	414.346	337.734	432.906	383.546	426.586	332.512	334.667	346.023
BICD1	195.433	-0.100382	0.154184	-0.651054	0.515011	0.692079	188.574	202.291	179.317	186.99	199.416	207.682	206.647	192.545
BICD2	968.376	-0.440593	0.108715	-4.05273	5.06e-05	0.000558846	821.217	1115.54	735.304	890.593	837.754	1120.16	1151.17	1075.28
BID	1030.76	-0.032111	0.0974108	-0.329645	0.741668	0.858677	1019.23	1042.3	1005.87	1016.7	1035.11	1026.26	1111.86	988.771
BIK	86.5602	-0.397598	0.293472	-1.35481	0.175478	0.342032	74.6715	98.4489	76.3952	86.972	60.6472	68.4909	143.141	83.7153
BIN1	3.23938	0.781068	1.11832	0.698429	0.484909	NA	4.11415	2.36461	5.30522	0.86972	6.16751	2.20938	3.0241	1.86034
BIN2	2.04539	-0.0246932	1.32162	-0.0186841	0.985093	NA	2.03623	2.05455	3.18313	0.86972	2.05584	2.20938	3.0241	0.93017
BIN3	315.801	-0.182299	0.137696	-1.32393	0.185528	0.356409	295.926	335.676	308.764	303.532	275.482	307.104	366.924	333.001
BIN3-IT1	3.5268	-0.672931	1.25774	-0.535032	0.592628	NA	2.67293	4.38067	1.06104	6.95776	0	2.20938	9.07229	1.86034
BIRC2	957.897	0.441275	0.105885	4.16749	3.08e-05	0.000368164	1103.45	812.347	1171.39	1091.5	1047.45	815.263	753	868.779
BIRC3	17.041	1.37869	0.499605	2.75956	0.00578795	0.026714	24.5654	9.5166	25.4651	28.7008	19.5305	9.94223	12.0964	6.51119
BIRC5	2110.01	-0.329226	0.093935	-3.50482	0.000456909	0.00347462	1870.7	2349.32	2041.45	1748.14	1822.5	2334.21	2367.87	2345.89
BIRC6	7434.91	-0.0509168	0.120262	-0.423383	0.672016	0.811764	7303.12	7566.7	6230.46	8645.88	7033.02	7728.43	7509.84	7461.82
BIRC6-AS2	6.17325	-0.0746066	0.80412	-0.0927804	0.926078	0.963238	6.067	6.2795	10.6104	3.47888	4.11168	4.41877	6.04819	8.37153
BIRC7	3.95709	-2.83286	1.25372	-2.25957	0.0238481	NA	0.975186	6.93899	0	0.86972	2.05584	2.20938	12.0964	6.51119
BISPR	224.162	3.77488	0.239583	15.7561	6.24e-56	9.5e-54	417.953	30.372	389.403	384.416	480.038	18.7798	45.3614	26.9749
BIVM	325.056	0.218744	0.144502	1.51378	0.130081	0.277106	349.96	300.151	392.587	325.275	332.018	287.22	280.233	333.001
BLACAT1	81.7253	-0.661102	0.25665	-2.57589	0.00999829	0.0412722	63.3354	100.115	58.3575	61.7501	69.8985	111.574	71.5703	117.201
BLCAP	1413.49	0.135166	0.0907947	1.48869	0.136568	0.287176	1479.85	1347.14	1514.11	1407.21	1518.24	1337.78	1392.09	1311.54
BLK	66.5289	-1.52289	0.285359	-5.33676	9.46e-08	2.6e-06	34.2033	98.8545	29.7093	40.0071	32.8934	98.3176	121.972	76.2739
BLM	1268.33	0.199222	0.0993741	2.00477	0.0449879	0.129092	1356.04	1180.62	1469.55	1260.22	1338.35	1203.01	1149.16	1189.69
BLMH	1070.21	0.120705	0.12691	0.951106	0.34155	0.538795	1115.16	1025.26	1322.06	1031.49	991.942	1057.19	988.879	1029.7
BLNK	63.2343	1.17201	0.260957	4.49118	7.08e-06	0.00010642	87.5123	38.9563	87.0057	86.1023	89.4289	46.3971	33.2651	37.2068
BLOC1S1	249.628	0.0808907	0.16115	0.501958	0.615697	0.771224	256.792	242.465	240.857	259.177	270.343	224.252	215.719	287.423
BLOC1S2	1467.35	0.362653	0.125584	2.88774	0.00388025	0.0194526	1650.94	1283.75	1960.81	1504.62	1487.4	1338.89	1288.26	1224.1
BLOC1S3	597.236	0.937791	0.120609	7.77548	7.52e-15	4.76e-13	785.004	409.467	742.731	748.829	863.452	380.014	434.462	413.926
BLOC1S4	335.558	0.0805822	0.126487	0.637079	0.524074	0.69905	344.963	326.152	360.755	340.06	334.074	322.57	338.699	317.188
BLOC1S6	1093.46	-0.205299	0.105331	-1.94909	0.0512849	0.142226	1016.12	1170.81	1124.71	935.819	987.83	1173.18	1190.49	1148.76
BLVRA	1198.18	0.347967	0.111563	3.11901	0.00181458	0.0106966	1342.19	1054.17	1472.73	1189.78	1364.05	1081.49	1086.66	994.352
BLVRB	1152.59	-0.815863	0.188662	-4.32446	1.53e-05	0.000204478	834.846	1470.33	576.147	954.952	973.439	1302.43	1781.19	1327.35
BLZF1	1466.61	0.973315	0.0903171	10.7766	4.44e-27	4.23e-25	1943.06	990.165	1926.86	1953.39	1948.93	1048.35	968.719	953.424
BMF	166.414	-0.769197	0.205709	-3.73925	0.000184567	0.00163976	123.125	209.703	97.6161	116.542	155.216	184.484	240.92	203.707
BMI1	18.3296	-1.25587	0.549734	-2.2845	0.0223422	0.0759803	10.7582	25.901	10.6104	16.5247	5.13959	14.361	37.2972	26.0448
BMP1	222.708	-0.613579	0.23963	-2.56052	0.0104515	0.0426664	175.869	269.547	133.692	219.169	174.746	204.368	368.94	235.333
BMP2K	261.315	-0.329383	0.161441	-2.04026	0.0413241	0.121063	231.381	291.249	189.927	262.655	241.561	293.848	270.153	309.747
BMP4	368.916	-0.177182	0.174182	-1.01723	0.309045	0.503537	346.008	391.824	253.59	406.159	378.274	376.7	418.333	380.44
BMP5	58.6029	-0.46595	0.258985	-1.79914	0.0719965	0.182174	49.2739	67.9319	51.9912	49.574	46.2564	60.7581	69.5542	73.4834
BMP6	30.4989	0.135418	0.440138	0.307671	0.758333	0.869632	31.895	29.1028	30.7703	33.0494	31.8655	40.8736	11.0884	35.3465
BMP7	4733.2	-0.114414	0.0916493	-1.24839	0.211889	0.390215	4545.51	4920.88	4292.99	4640.83	4702.73	4682.79	5329.46	4750.38
BMP7-AS1	6.81383	0.736356	0.751838	0.979409	0.327378	0.524433	8.49172	5.13593	10.6104	8.6972	6.16751	7.73284	3.0241	4.65085
BMP8A	128.221	-0.394884	0.185467	-2.12913	0.0332435	0.102824	110.68	145.762	99.7382	113.064	119.239	152.448	147.173	137.665
BMP8B	155.849	-0.127653	0.17608	-0.72497	0.46847	0.65335	148.811	162.887	142.18	169.595	134.657	160.18	158.261	170.221
BMPER	4.96901	-0.072986	0.854745	-0.0853893	0.931952	NA	4.81463	5.1234	4.24418	6.08804	4.11168	5.52346	7.05622	2.79051
BMPR1A	1259.21	0.0849286	0.100809	0.84247	0.399525	0.593198	1295.89	1222.52	1319.94	1339.37	1228.36	1283.65	1263.06	1120.85
BMPR1B	610.83	-0.238544	0.125024	-1.90798	0.0563937	0.152595	560.105	661.555	565.537	590.54	524.239	747.877	597.763	639.027
BMPR1B-AS1	9.00477	0.475949	0.72208	0.659136	0.509808	0.687287	10.4446	7.56498	15.9157	11.3064	4.11168	12.1516	4.03213	6.51119
BMPR2	2923.21	0.334058	0.0852092	3.92045	8.84e-05	0.000885744	3259.66	2586.75	3150.24	3443.22	3185.52	2673.35	2574.51	2512.39
BMS1	3301.55	0.220798	0.0835188	2.64369	0.00820073	0.0353695	3554.05	3049.05	3763.53	3389.3	3509.32	3024.65	3036.19	3086.3
BMS1P20	438.553	0.139515	0.118533	1.17702	0.239188	0.424231	459.716	417.39	479.592	462.691	436.866	431.935	395.149	425.088
BMS1P4	257.197	0.0594571	0.146808	0.405	0.685478	0.820845	262.304	252.089	238.735	292.226	255.952	243.032	262.088	251.146
BMS1P5	128.832	0.329193	0.187919	1.75178	0.0798113	0.195392	143.512	114.152	149.607	145.243	135.685	102.736	129.028	110.69
BMS1P6	3.04302	-0.809597	1.23261	-0.656817	0.511299	NA	2.20963	3.8764	2.12209	3.47888	1.02792	0	6.04819	5.58102
BNC1	1.83031	0.766753	1.47465	0.519955	0.603095	NA	2.30405	1.35657	1.06104	1.73944	4.11168	2.20938	0	1.86034
BNIP1	565.336	0.148836	0.114144	1.30393	0.192257	0.365313	594.747	535.925	594.185	572.276	617.779	520.31	507.04	580.426
BNIP2	1069.78	0.214085	0.102334	2.09202	0.0364363	0.110154	1149.01	990.537	1231.87	1158.47	1056.7	1010.79	951.582	1009.23
BNIP3	5511.65	0.505713	0.0935544	5.40555	6.46e-08	1.85e-06	6468.06	4555.25	7083.54	5984.54	6336.09	4740.23	4450.46	4475.05
BNIP3L	4151.69	0.330611	0.0841573	3.92849	8.55e-05	0.000860955	4625.35	3678.03	4872.32	4486.01	4517.7	3836.6	3538.19	3659.29
BNIPL	154.238	-0.304922	0.178603	-1.70726	0.0877733	0.209396	138.179	170.297	141.119	135.676	137.741	150.238	165.317	195.336
BOC	69.6125	-0.362294	0.271735	-1.33326	0.182446	0.352206	60.8441	78.3809	51.9912	67.8381	62.7031	66.2815	102.819	66.0421
BOD1	2505.48	0.0949669	0.0873049	1.08776	0.276701	0.466704	2588.31	2422.64	2754.47	2444.78	2565.69	2383.93	2428.35	2455.65
BOD1L1	2131.47	-0.00255637	0.0936646	-0.0272928	0.978226	0.98848	2129.23	2133.71	2201.67	2213.44	1972.58	2239.21	2123.92	2038
BOK	509.858	-0.634719	0.210748	-3.01175	0.00259748	0.0142257	399.371	620.346	277.994	417.466	502.652	542.404	790.297	528.337
BOLA1	715.207	0.0251761	0.116523	0.21606	0.828941	0.912352	721.83	708.584	768.196	670.554	726.739	644.035	770.136	711.58
BOLA3	687.56	0.0889034	0.113469	0.783502	0.433332	0.623159	709.046	666.074	768.196	694.906	664.036	623.046	667.317	707.859
BOLA3-AS1	47.403	-0.151481	0.316593	-0.478474	0.632313	0.783202	44.8665	49.9395	28.6482	50.4438	55.5076	46.3971	50.4016	53.0197
BOLL	10.5857	0.856577	0.64532	1.32737	0.184387	0.355071	13.5742	7.5972	12.7325	15.655	12.335	13.2563	3.0241	6.51119
BOP1	706.189	-1.19203	0.200606	-5.94214	2.81e-09	1.04e-07	429.645	982.732	307.703	516.614	464.619	877.126	1259.03	812.038
BORA	320.895	0.0949626	0.152814	0.621426	0.534319	0.707871	331.277	310.514	344.84	320.057	328.934	371.177	270.153	290.213
BPGM	260.137	-0.0575068	0.146982	-0.391249	0.695613	0.828145	255.042	265.232	272.689	242.652	249.784	281.696	235.879	278.121
BPHL	712.061	0.0406539	0.101281	0.401395	0.688129	0.822649	722.339	701.782	743.792	697.515	725.711	683.804	701.59	719.952
BPNT1	660.966	-0.0508435	0.110056	-0.461979	0.644096	0.791357	649.471	672.46	681.191	656.638	610.584	627.465	701.59	688.326
BPTF	7534.04	-0.0196521	0.0900368	-0.218268	0.827221	0.911558	7482.16	7585.92	7065.5	8204.07	7176.93	7760.46	7444.32	7552.98
BRAF	238.492	-0.122524	0.170039	-0.720563	0.471179	0.656066	228.356	248.629	213.27	260.046	211.751	222.043	230.839	293.004
BRAP	1106.21	0.196939	0.0982699	2.00407	0.0450628	0.129235	1181.94	1030.48	1257.34	1134.11	1154.35	1009.69	999.968	1081.79
BRAT1	726.543	-1.08631	0.199914	-5.43389	5.51e-08	1.59e-06	464.965	988.121	333.168	537.487	524.239	879.335	1271.13	813.899
BRCA1	1844.91	0.111618	0.0913455	1.22193	0.221734	0.402471	1915.93	1773.89	1969.3	1956	1822.5	1882.4	1727.77	1711.51
BRCA2	1965.26	0.346096	0.11744	2.947	0.0032087	0.0167628	2199.25	1731.26	1966.12	2464.79	2166.85	1924.37	1623.94	1645.47
BRCC3	1552.42	0.106515	0.101043	1.05415	0.291814	0.484308	1609.59	1495.25	1702.98	1650.73	1475.06	1563.14	1397.13	1525.48
BRD1	602.139	-0.436448	0.160779	-2.71459	0.00663583	0.0298622	511.382	692.896	422.296	623.589	488.261	620.837	798.361	659.491
BRD2	10133.5	0.182562	0.0849481	2.1491	0.0316268	0.0991475	10773.7	9493.19	10113.9	11002	11205.3	9075.05	9974.48	9430.06
BRD3	874.571	-0.308633	0.135361	-2.28007	0.0226035	0.0766001	781.253	967.889	719.388	868.85	755.52	825.205	1113.88	964.586
BRD4	1369.01	-0.2875	0.138021	-2.08301	0.03725	0.11216	1232.71	1505.31	995.26	1404.6	1298.26	1405.17	1665.27	1445.48
BRD7	1960.71	0.361641	0.102086	3.54249	0.000396364	0.00309455	2205.44	1715.99	2456.32	2022.97	2137.04	1759.77	1680.39	1707.79
BRD8	2840.16	-0.00148267	0.0843612	-0.0175753	0.985978	0.991857	2838.86	2841.47	2929.54	2812.67	2774.35	2868.89	2698.5	2957.01
BRD9	1116.19	-0.121859	0.0968051	-1.25881	0.208098	0.385485	1068.85	1163.53	989.955	1105.41	1111.18	1166.55	1174.36	1149.69
BRE	1171.5	0.11169	0.0895869	1.24672	0.212501	0.391156	1216.86	1126.14	1235.06	1187.17	1228.36	1140.04	1137.06	1101.32
BRE-AS1	7.82084	-0.482452	0.687197	-0.702058	0.482643	0.665048	6.51926	9.12242	8.48836	6.95776	4.11168	8.83754	11.0884	7.44136
BREA2	11.1817	-0.989111	0.591403	-1.67248	0.0944292	0.220231	7.47237	14.891	6.36627	7.82748	8.22335	18.7798	10.0803	15.8129
BRF1	1152.92	-0.602284	0.153628	-3.92041	8.84e-05	0.000885744	915.382	1390.45	724.694	1048.01	973.439	1251.62	1624.95	1294.8
BRF2	276.355	0.131335	0.139244	0.943201	0.345578	0.542832	289.078	263.631	306.642	286.138	274.454	255.184	252.008	283.702
BRI3	535.517	-0.174869	0.125764	-1.39045	0.164392	0.327136	502.934	568.1	443.517	523.571	541.713	550.137	611.875	542.289
BRI3BP	212.26	-1.24648	0.232395	-5.36363	8.16e-08	2.28e-06	125.531	298.99	93.3719	172.205	111.015	241.928	363.9	291.143
BRICD5	74.8137	-0.978993	0.377014	-2.5967	0.00941231	0.0394727	50.1569	99.4705	25.4651	75.6656	49.3401	79.5378	148.181	70.6929
BRINP2	48.3429	-0.564822	0.306797	-1.84103	0.0656178	0.170428	39.1747	57.5111	41.3807	27.831	48.3122	50.8158	58.4658	63.2516
BRINP3	28.3198	-0.167944	0.359722	-0.466872	0.640591	0.789065	26.6434	29.9963	27.5872	28.7008	23.6421	29.8267	32.257	27.9051
BRIP1	13198.2	0.431707	0.0772619	5.58759	2.3e-08	7.22e-07	15157.9	11238.4	15307.7	15321.9	14844.2	11825.7	10847.4	11042
BRIX1	1429.71	0.354906	0.105855	3.35274	0.000800161	0.00550013	1604.97	1254.45	1785.74	1515.05	1514.12	1265.98	1190.49	1306.89
BRK1	9614.35	0.146	0.0924231	1.57969	0.114178	0.252444	10100.7	9127.99	10942.6	9591.27	9768.31	9374.42	8508.8	9500.76
BRMS1	846.981	-0.423284	0.119254	-3.54944	0.000386055	0.00303237	723.865	970.098	680.13	700.994	790.47	859.45	1045.33	1005.51
BRMS1L	909.588	0.136089	0.104992	1.29618	0.194914	0.368665	952.597	866.579	1040.88	901.03	915.876	882.649	879.004	838.083
BROX	1014.52	0.118277	0.11451	1.0329	0.301652	0.4956	1056.16	972.886	1188.37	1009.74	970.355	1032.89	919.325	966.447
BRPF1	1544.51	-0.273361	0.130759	-2.09058	0.0365659	0.110459	1398.38	1690.64	1134.26	1493.31	1567.58	1625	1814.46	1632.45
BRPF3	1939.18	-0.192183	0.113774	-1.68916	0.0911892	0.214767	1809.91	2068.44	1539.58	1975.13	1915.01	1988.45	2137.03	2079.86
BRSK1	106.64	-0.353401	0.250091	-1.41309	0.157629	0.318311	93.4185	119.862	59.4185	113.933	106.904	124.83	124.996	109.76
BRSK2	100.951	-0.437035	0.265619	-1.64535	0.0998984	0.229232	85.7337	116.169	60.4796	93.9297	102.792	89.4801	150.197	108.83
BRWD1	6381.19	0.162526	0.086329	1.88263	0.0597501	0.159016	6739.71	6022.66	6614.55	7193.45	6411.13	6315.52	5837.51	5914.95
BRWD1-AS1	27.2414	0.521539	0.379577	1.374	0.169442	0.333702	32.0778	22.4049	38.1976	31.3099	26.7259	26.5126	21.1687	19.5336
BRWD1-IT2	46.0085	-0.325762	0.336816	-0.96718	0.333454	0.530662	40.8101	51.2069	33.9534	50.4438	38.033	33.1408	66.5301	53.9499
BRWD3	1280.7	0.288171	0.103125	2.79437	0.00520008	0.0245395	1407.79	1153.6	1453.63	1477.65	1292.09	1231.73	1137.06	1092.02
BSCL2	7.84343	-1.60063	0.746957	-2.14286	0.032124	0.10024	3.87009	11.8168	2.12209	4.3486	5.13959	9.94223	17.1365	8.37153
BSDC1	1519.71	-0.0263958	0.105561	-0.250054	0.802546	0.896009	1505.72	1533.71	1350.71	1540.27	1626.17	1468.14	1627.97	1505.02
BSG	4371.81	-0.848574	0.180936	-4.68991	2.73e-06	4.87e-05	3121.68	5621.95	2182.57	3456.27	3726.21	5081.58	6791.11	4993.15
BSN	230.844	-0.601955	0.233741	-2.57531	0.010015	0.0413194	183.132	278.557	119.898	226.997	202.5	243.032	350.795	241.844
BSN-AS2	6.85184	0.300662	0.767725	0.391628	0.695333	0.828009	7.54718	6.15649	8.48836	6.95776	7.19543	9.94223	2.01606	6.51119
BSPRY	890.355	-0.285767	0.126104	-2.26612	0.023444	0.0788118	802.506	978.205	722.572	773.181	911.764	927.941	1087.67	919.008
BST2	2960.17	4.47298	0.125506	35.6397	3.4e-278	1.65e-275	5665.75	254.577	5234.13	5641.87	6121.26	208.787	284.265	270.679
BTAF1	3051.77	0.348392	0.0850156	4.09797	4.17e-05	0.000474608	3418.16	2685.37	3265.9	3640.65	3347.93	2684.4	2661.2	2710.52
BTBD1	2188.87	0.0582495	0.106287	0.548038	0.583666	0.746525	2233.15	2144.58	2497.7	2064.71	2137.04	2291.13	2102.75	2039.86
BTBD10	1462.88	0.190254	0.0946546	2.00998	0.0444328	0.12783	1559.35	1366.41	1659.47	1494.18	1524.4	1412.9	1300.36	1385.95
BTBD11	185.086	-0.347781	0.1633	-2.12971	0.0331957	0.102717	162.896	207.276	176.133	163.507	149.048	216.52	189.51	215.799
BTBD19	4.50536	-0.382517	1.06402	-0.359502	0.719219	NA	3.90074	5.10998	0	3.47888	8.22335	7.73284	2.01606	5.58102
BTBD2	534.197	-1.06522	0.446158	-2.38754	0.0169614	0.0618265	345.392	723.003	179.317	437.469	419.391	600.952	960.654	607.401
BTBD3	1327.74	0.0113331	0.0934086	0.121328	0.903431	0.952075	1333.07	1322.42	1379.36	1307.19	1312.65	1359.88	1241.9	1365.49
BTBD6	2585.31	-0.383396	0.101132	-3.79107	0.000150002	0.00137808	2243.91	2926.71	2110.42	2222.13	2399.16	2702.08	3195.46	2882.6
BTBD7	2437.21	-0.0672677	0.0857858	-0.784136	0.43296	0.623079	2379.99	2494.44	2275.94	2526.54	2337.49	2522.01	2489.84	2471.46
BTBD8	19.1506	0.0797813	0.449383	0.177535	0.859088	0.930367	19.6693	18.6319	15.9157	17.3944	25.698	22.0938	16.1285	17.6732
BTBD9	344.641	-0.01126	0.144419	-0.0779677	0.937854	0.970041	342.903	346.378	297.093	380.068	351.548	378.909	334.667	325.559
BTC	85.0911	1.97791	0.242323	8.16226	3.29e-16	2.18e-14	135.58	34.6025	129.447	142.634	134.657	39.7689	34.2731	29.7654
BTD	530.709	0.0460696	0.116287	0.396171	0.691979	0.825344	539.54	521.879	569.781	500.959	547.881	490.483	540.305	534.848
BTF3	10950.9	0.0966944	0.108179	0.893834	0.371411	0.567221	11318.2	10583.7	13054	10036.6	10864.1	10692.3	10387.8	10670.9
BTF3L4	2362.76	0.226964	0.0858371	2.64412	0.0081903	0.0353526	2548.25	2177.27	2693.99	2507.4	2443.36	2228.16	2152.15	2151.48
BTG1	1492.96	0.349309	0.116501	2.99834	0.00271453	0.014747	1672.93	1312.99	1916.25	1552.45	1550.1	1404.06	1230.81	1304.1
BTG2	642.554	-0.000674098	0.112198	-0.0060081	0.995206	0.997213	642.601	642.506	676.947	616.631	634.226	608.685	696.55	622.284
BTK	6.80281	6.18795	1.40171	4.41456	1.01e-05	0.000145727	13.6056	0	23.343	11.3064	6.16751	0	0	0
BTN2A1	860.019	0.711921	0.106337	6.69494	2.16e-11	1.04e-09	1068.22	651.817	1007.99	1090.63	1106.04	602.057	662.277	691.116
BTN2A2	211.638	0.809566	0.153888	5.26075	1.43e-07	3.76e-06	269.696	153.579	285.421	257.437	266.231	141.401	160.277	159.059
BTN2A3P	37.4849	0.633057	0.334876	1.89042	0.0587013	0.157087	45.4648	29.505	45.6249	54.7924	35.9772	34.2455	28.2249	26.0448
BTN3A1	350.935	5.10371	0.22392	22.7926	5.43e-115	1.22e-112	682.114	19.7557	687.557	661.857	696.929	19.8845	16.1285	23.2542
BTN3A2	190.549	4.88964	0.278916	17.5309	8.33e-69	1.49e-66	368.739	12.359	366.06	355.715	384.442	9.94223	14.1124	13.0224
BTN3A3	60.7628	3.95423	0.397746	9.94158	2.74e-23	2.38e-21	114.277	7.24815	126.264	103.497	113.071	6.62815	3.0241	12.0922
BTRC	1130.21	0.246771	0.097109	2.54117	0.0110482	0.0445865	1226.65	1033.78	1230.81	1268.05	1181.08	1030.68	976.783	1093.88
BUB1	2335.72	0.161445	0.079358	2.03438	0.041913	0.122418	2466.38	2205.06	2482.84	2459.57	2456.73	2191.71	2174.32	2249.15
BUB1B	1386.73	-0.279659	0.0859609	-3.25333	0.00114062	0.00735502	1252.72	1520.74	1254.15	1271.53	1232.47	1506.8	1515.07	1540.36
BUB3	4438.97	0.135558	0.0924199	1.46676	0.142442	0.295741	4647.71	4230.23	5078.16	4305.11	4559.85	4317.14	4108.74	4264.83
BUD13	508.365	0.309706	0.133601	2.31814	0.0204415	0.0711687	563.17	453.561	576.147	496.61	616.751	421.992	435.47	503.222
BUD31	1352.19	0.238789	0.131291	1.81877	0.0689468	0.176314	1464.28	1240.1	1757.09	1293.27	1342.46	1193.07	1203.59	1323.63
BVES	17.3328	0.18576	0.49013	0.379002	0.704686	0.83371	18.3974	16.2681	12.7325	20.8733	21.5863	15.4657	22.1767	11.162
BYSL	830.286	-0.0895754	0.109521	-0.817885	0.413423	0.605824	804.889	855.683	789.417	745.35	879.899	818.577	851.787	896.684
BZW1	11640	0.191275	0.097409	1.96363	0.0495732	0.138535	12410.6	10869.3	13658.8	11693.4	11879.7	11528.6	10126.7	10952.8
BZW2	5030.98	0.121695	0.0837907	1.45237	0.146399	0.3014	5243.31	4818.65	5541.84	4999.15	5188.93	4928.03	4626.87	4901.07
C10orf10	8.61082	0.0453597	0.646383	0.0701747	0.944055	0.972878	8.70681	8.51483	8.48836	10.4366	7.19543	11.0469	7.05622	7.44136
C10orf105	4.0374	0.540623	1.08585	0.497878	0.61857	NA	4.79255	3.28224	2.12209	6.08804	6.16751	0	7.05622	2.79051
C10orf107	33.2032	0.0270023	0.363598	0.0742641	0.9408	0.971534	33.5036	32.9027	43.5028	31.3099	25.698	40.8736	26.2088	31.6258
C10orf11	27.4673	0.148931	0.369575	0.402978	0.686964	0.821699	28.9057	26.029	29.7093	31.3099	25.698	23.1985	24.1928	30.6956
C10orf111	7.48648	0.539523	0.753721	0.715813	0.474107	0.658606	8.86749	6.10548	13.7936	8.6972	4.11168	5.52346	9.07229	3.72068
C10orf12	469.896	-0.0216388	0.13463	-0.160728	0.872307	0.935723	465.977	473.815	412.746	528.79	456.396	504.844	438.494	478.107
C10orf131	8.75207	-0.566053	0.742384	-0.762479	0.445774	0.633979	7.02426	10.4799	6.36627	9.56692	5.13959	6.62815	20.1606	4.65085
C10orf142	2.40049	0.0232104	1.38769	0.0167259	0.986655	NA	2.44265	2.35834	4.24418	0	3.08376	1.10469	5.04016	0.93017
C10orf2	1365.2	0.0552047	0.0980561	0.562991	0.573441	0.738253	1391.53	1338.87	1316.76	1388.94	1468.9	1263.77	1330.6	1422.23
C10orf25	7.97152	0.051807	0.678953	0.0763041	0.939177	0.970843	8.07426	7.86877	8.48836	9.56692	6.16751	11.0469	6.04819	6.51119
C10orf32	305.047	0.158812	0.15582	1.0192	0.308107	0.502588	321.606	288.489	350.145	316.578	298.096	329.198	295.353	240.914
C10orf35	441.324	0.0903346	0.129859	0.695635	0.486657	0.668286	455.385	427.264	425.479	440.078	500.596	387.747	435.47	458.574
C10orf67	3.47324	0.653908	1.01638	0.643367	0.519986	NA	4.24586	2.70062	5.30522	4.3486	3.08376	2.20938	4.03213	1.86034
C10orf76	1323.82	0.187149	0.0915505	2.04422	0.0409318	0.120004	1409.6	1238.03	1437.72	1450.69	1340.41	1200.8	1239.88	1273.4
C10orf88	324.006	0.188719	0.136202	1.38558	0.165875	0.328953	345.23	302.783	366.06	313.969	355.66	325.884	291.321	291.143
C10orf91	9.15384	-0.858869	0.672901	-1.27637	0.201825	0.377203	6.49718	11.8105	6.36627	6.95776	6.16751	8.83754	19.1526	7.44136
C10orf95	8.91092	0.238054	0.676751	0.35176	0.725018	0.847429	9.682	8.13984	8.48836	11.3064	9.25127	4.41877	6.04819	13.9525
C11orf1	73.7642	0.250717	0.232332	1.07913	0.280529	0.47096	80.1785	67.3499	83.8225	76.5353	80.1777	71.805	60.4819	69.7627
C11orf24	565.897	-0.307979	0.135397	-2.27464	0.0229275	0.0774784	505.652	626.142	428.662	515.744	572.551	589.906	677.397	611.122
C11orf30	1582.69	0.000948547	0.089012	0.0106564	0.991498	0.995152	1583.06	1582.31	1499.26	1646.38	1603.55	1553.2	1583.62	1610.12
C11orf31	533.803	0.00911151	0.148664	0.0612892	0.951129	0.976221	535.833	531.772	644.054	484.434	479.01	476.122	580.626	538.568
C11orf42	3.12494	-0.529893	1.12211	-0.472231	0.636762	NA	2.54123	3.70865	1.06104	3.47888	3.08376	2.20938	7.05622	1.86034
C11orf45	53.3773	0.711641	0.295872	2.40524	0.016162	0.0596979	66.2852	40.4694	65.7848	76.5353	56.5355	30.9314	51.4096	39.0671
C11orf49	523.985	-0.103622	0.118564	-0.873974	0.382132	0.577796	505.211	542.76	464.738	512.265	538.629	508.158	568.53	551.591
C11orf54	454.576	-0.0502154	0.120753	-0.415851	0.677519	0.815935	446.885	462.266	464.738	406.159	469.759	473.913	450.59	462.294
C11orf57	757.225	0.072643	0.109961	0.660623	0.508854	0.686422	776.502	737.948	822.31	721.867	785.33	720.259	791.305	702.278
C11orf58	5272.21	0.162856	0.0959077	1.69805	0.0894991	0.212014	5569.64	4974.78	6196.5	5273.11	5239.3	5131.29	4904.08	4888.97
C11orf63	113.032	0.178475	0.20906	0.853702	0.39327	0.587765	120.027	106.037	111.41	107.845	140.825	107.155	117.94	93.017
C11orf65	21.826	0.166913	0.421891	0.39563	0.692378	0.825629	23.1338	20.5182	29.7093	19.1338	20.5584	22.0938	17.1365	22.3241
C11orf68	499.985	-0.192944	0.13308	-1.44983	0.147106	0.302334	466.678	533.291	419.113	461.821	519.099	483.855	587.683	528.337
C11orf70	2.46885	-0.286211	1.22256	-0.234109	0.814901	NA	2.19859	2.7391	1.06104	3.47888	2.05584	4.41877	1.00803	2.79051
C11orf71	193.235	0.0593918	0.164363	0.361344	0.717842	0.842071	197.435	189.035	222.819	178.293	191.193	176.751	200.598	189.755
C11orf72	638.825	0.19919	0.115195	1.72916	0.0837806	0.202045	683.146	594.503	751.22	644.462	653.756	589.906	568.53	625.074
C11orf73	753.626	0.132873	0.117879	1.1272	0.25966	0.447848	788.664	718.587	868.996	715.779	781.218	725.783	666.309	763.67
C11orf74	98.3828	0.0892204	0.230725	0.386696	0.698981	0.830076	101.461	95.3045	123.081	105.236	76.066	92.7941	91.7309	101.389
C11orf80	709.746	0.130788	0.103421	1.26462	0.206008	0.382839	742.062	677.43	739.548	744.48	742.157	656.187	655.221	720.882
C11orf84	482.192	-0.553803	0.156457	-3.53964	0.000400673	0.00311878	390.578	573.806	324.68	446.166	400.888	487.169	649.173	585.077
C11orf95	187.006	-0.391161	0.16275	-2.40345	0.0162412	0.0598908	161.777	212.234	162.34	173.944	149.048	193.321	224.791	218.59
C11orf98	7.19826	-1.5718	0.987155	-1.59225	0.111328	0.24791	3.54265	10.8539	1.06104	9.56692	0	4.41877	15.1205	13.0224
C12orf10	956.1	-0.328825	0.107335	-3.06354	0.00218732	0.0124585	847.685	1064.52	811.699	828.843	902.513	1011.9	1161.25	1020.4
C12orf29	508.79	0.125256	0.126181	0.992664	0.320873	0.517002	530.666	486.915	532.644	550.533	508.82	535.776	426.397	498.571
C12orf4	575.376	0.34804	0.116493	2.98765	0.00281132	0.0151561	644.573	506.178	711.961	618.371	603.388	514.787	494.944	508.803
C12orf42	5.68998	-0.419677	0.879794	-0.477017	0.63335	0.783909	4.90049	6.47947	7.42731	5.21832	2.05584	3.31408	4.03213	12.0922
C12orf43	511.71	0.0630075	0.109197	0.57701	0.563933	0.731456	522.886	500.534	522.034	524.441	522.183	490.483	518.128	492.99
C12orf45	450.614	0.251016	0.135679	1.85007	0.064303	0.167852	490.054	411.174	558.11	439.209	472.843	407.631	384.06	441.831
C12orf49	2511.38	-0.297988	0.0921462	-3.23387	0.00122126	0.00780049	2252.79	2769.97	2062.67	2304.76	2390.94	2712.02	2831.56	2766.33
C12orf56	37.1399	-0.0860774	0.328736	-0.261844	0.793442	0.890653	36.0926	38.1871	33.9534	32.1796	42.1447	38.6642	31.249	44.6482
C12orf57	916.568	-0.903386	0.177599	-5.08666	3.64e-07	8.39e-06	638.37	1194.77	506.118	741.871	667.119	983.176	1510.03	1091.09
C12orf60	24.5976	0.275677	0.419497	0.657162	0.511077	0.688339	26.9647	22.2304	38.1976	25.2219	17.4746	23.1985	21.1687	22.3241
C12orf65	412.002	0.0325217	0.119072	0.273126	0.784757	0.885861	416.65	407.354	401.075	407.899	440.977	407.631	416.317	398.113
C12orf66	595.852	0.128948	0.106	1.2165	0.223796	0.405171	622.465	569.24	631.322	601.846	634.226	586.592	569.538	551.591
C12orf71	3.83979	-1.17126	1.14646	-1.02164	0.306953	NA	2.40095	5.27862	5.30522	0.86972	1.02792	1.10469	10.0803	4.65085
C12orf73	481.91	-0.0383328	0.111958	-0.342385	0.732061	0.852259	475.362	488.457	458.371	483.564	484.15	502.635	481.839	480.898
C12orf75	923.686	0.227381	0.0994286	2.28688	0.0222028	0.0756886	996.586	850.786	1053.62	934.949	1001.19	856.136	837.674	858.547
C12orf76	264.393	0.254114	0.157486	1.61356	0.106622	0.239908	287.643	241.143	325.741	256.567	280.622	271.754	223.783	227.892
C12orf79	6.37489	-1.55206	0.82709	-1.87653	0.0605828	0.160626	3.25963	9.49015	4.24418	3.47888	2.05584	5.52346	8.06426	14.8827
C12orf80	5.97949	0.267725	0.776507	0.344781	0.730259	0.851183	6.51926	5.43972	8.48836	6.95776	4.11168	6.62815	5.04016	4.65085
C14orf1	2095.61	0.347613	0.086002	4.04192	5.3e-05	0.000579059	2347.16	1844.06	2461.62	2257.79	2322.07	1834.89	1804.38	1892.9
C14orf105	8.18591	-0.860742	0.716582	-1.20118	0.229682	0.412556	5.77021	10.6016	7.42731	7.82748	2.05584	14.361	9.07229	8.37153
C14orf119	1265.55	0.348754	0.118266	2.94891	0.003189	0.0166824	1418.23	1112.87	1632.95	1251.53	1370.22	1077.07	1111.86	1149.69
C14orf132	3707.97	0.116888	0.0954359	1.22478	0.220659	0.401318	3857.96	3557.98	3457.95	4020.71	4095.23	3470.94	3561.38	3641.62
C14orf142	443.295	0.0992983	0.143744	0.690798	0.489693	0.67026	458.527	428.064	527.339	422.684	425.558	484.96	400.189	399.043
C14orf159	131.369	0.912614	0.207486	4.39845	1.09e-05	0.0001544	171.462	91.2752	143.241	174.814	196.333	92.7941	103.827	77.2041
C14orf166	2745.81	0.16235	0.103315	1.57141	0.116088	0.255501	2900.5	2591.12	3275.45	2646.56	2779.49	2621.43	2549.31	2602.62
C14orf169	652.343	-0.159061	0.135341	-1.17526	0.239889	0.425036	616.789	687.897	622.833	592.279	635.254	562.288	760.056	741.345
C14orf178	4.55876	-1.8268	1.02985	-1.77384	0.0760895	NA	2.03623	7.08129	3.18313	0.86972	2.05584	4.41877	13.1044	3.72068
C14orf2	4447.55	0.217528	0.135335	1.60733	0.107982	0.242136	4782.65	4112.45	5827.26	4287.72	4232.97	3959.22	3830.52	4547.6
C14orf28	227.723	0.505654	0.170024	2.97401	0.00293931	0.0156773	267.194	188.251	310.886	240.912	249.784	215.415	175.398	173.942
C14orf37	16.2736	-0.117464	0.498924	-0.235434	0.813872	0.902229	15.659	16.8883	18.0378	10.4366	18.5025	15.4657	22.1767	13.0224
C14orf79	727.302	0.00449807	0.10855	0.0414378	0.966947	0.983099	728.563	726.04	741.67	735.783	708.236	668.339	784.249	725.533
C14orf80	483.055	-1.28033	0.23117	-5.53846	3.05e-08	9.29e-07	281.488	684.622	187.805	340.06	316.599	577.754	926.381	549.73
C14orf93	330.652	0.148845	0.128258	1.16051	0.245842	0.432083	347.782	313.522	335.29	340.06	367.995	301.581	324.586	314.397
C15orf26	5.78614	-0.13708	0.867259	-0.158062	0.874408	0.936495	5.49991	6.07237	4.24418	6.08804	6.16751	8.83754	1.00803	8.37153
C15orf27	11.968	-0.468562	0.563032	-0.832212	0.405289	0.598582	9.99399	13.942	10.6104	12.1761	7.19543	15.4657	16.1285	10.2319
C15orf39	338.246	-0.543418	0.22153	-2.45302	0.0141661	0.0540756	275.086	401.406	180.378	320.057	324.822	352.397	503.008	348.814
C15orf40	491.535	0.0283027	0.121743	0.23248	0.816165	0.904126	496.392	486.678	531.583	471.388	486.206	525.833	449.582	484.619
C15orf41	87.2184	0.0180469	0.219417	0.0822497	0.934448	0.968095	87.7961	86.6407	96.5551	88.7114	78.1218	87.2707	79.6345	93.017
C15orf48	2.38131	0.958926	1.48739	0.644702	0.51912	NA	3.15417	1.60846	4.24418	5.21832	0	1.10469	0	3.72068
C15orf52	72.5079	-0.61101	0.233855	-2.61277	0.00898121	0.0380955	57.3984	87.6174	55.1743	57.4015	59.6193	81.7472	92.7389	88.3661
C15orf56	9.81442	0.160307	0.723266	0.221643	0.824592	0.909759	10.2549	9.37391	5.30522	18.2641	7.19543	16.5704	5.04016	6.51119
C15orf57	319.342	0.267192	0.15274	1.74932	0.080235	0.196145	349.076	289.608	406.38	302.663	338.185	300.476	265.112	303.235
C15orf59	18.6923	-1.18574	0.473505	-2.50418	0.0122736	0.0484605	11.4062	25.9785	9.5494	11.3064	13.3629	23.1985	34.2731	20.4637
C15orf59-AS1	2.34578	0.0100624	1.25113	0.00804267	0.993583	NA	2.37887	2.3127	3.18313	0.86972	3.08376	2.20938	1.00803	3.72068
C15orf61	61.0533	0.388311	0.257693	1.50688	0.131842	0.279973	69.2594	52.8472	67.9069	73.0565	66.8147	44.1877	59.4739	54.88
C15orf62	59.7731	-0.221081	0.251488	-0.87909	0.379353	0.574993	55.1998	64.3464	54.1133	53.9226	57.5635	66.2815	63.506	63.2516
C15orf65	40.4573	0.638236	0.303992	2.09951	0.0357718	0.108559	49.2518	31.6629	49.8691	49.574	48.3122	32.0361	32.257	30.6956
C16orf13	868.905	-0.594751	0.150317	-3.95665	7.6e-05	0.000779723	692.18	1045.63	583.575	709.691	783.274	957.768	1248.95	930.17
C16orf45	72.1775	0.0225415	0.24344	0.0925955	0.926225	0.963238	72.683	71.6719	62.6016	83.4931	71.9543	68.4909	66.5301	79.9946
C16orf46	49.3705	0.141086	0.308854	0.456805	0.647811	0.794146	51.7601	46.9808	47.747	41.7466	65.7868	57.444	45.3614	38.137
C16orf52	594.267	0.175562	0.113014	1.55346	0.120314	0.261943	630.136	558.398	649.359	659.248	581.802	588.801	541.313	545.08
C16orf58	1639.58	-0.404225	0.155851	-2.59366	0.00949608	0.0397651	1411.18	1867.99	1067.41	1474.18	1691.95	1821.64	2074.53	1707.79
C16orf59	495.746	-0.644783	0.171938	-3.75008	0.000176775	0.00158724	386.736	604.755	302.398	398.332	459.48	515.891	708.646	589.728
C16orf62	151.873	-0.0437486	0.16978	-0.257679	0.796655	0.8929	149.514	154.232	146.424	153.071	149.048	151.343	165.317	146.037
C16orf70	538.339	0.151395	0.132488	1.14271	0.253161	0.440456	566.3	510.378	479.592	637.505	581.802	494.902	518.128	518.105
C16orf71	16.3806	-0.638952	0.530559	-1.2043	0.228474	0.41129	12.8185	19.9428	8.48836	10.4366	19.5305	25.4079	12.0964	22.3241
C16orf72	1568.99	0.183497	0.101102	1.81496	0.0695303	0.17738	1668.9	1469.09	1852.58	1574.19	1579.91	1485.81	1442.49	1478.97
C16orf74	155.075	-0.86714	0.194583	-4.45641	8.33e-06	0.000122848	109.954	200.195	113.532	99.1481	117.183	180.065	241.928	178.593
C16orf86	12.3632	-0.299432	0.624031	-0.479835	0.631345	0.78264	11.055	13.6713	13.7936	12.1761	7.19543	13.2563	22.1767	5.58102
C16orf87	335.327	0.120508	0.157744	0.763945	0.4449	0.633223	349.483	321.171	420.174	298.314	329.962	341.35	323.578	298.585
C16orf89	5.10937	0.447603	0.903745	0.495275	0.620406	NA	5.85775	4.36098	3.18313	11.3064	3.08376	3.31408	6.04819	3.72068
C16orf91	290.994	-0.334303	0.139231	-2.40107	0.0163474	0.0601822	257.637	324.351	266.322	238.303	268.287	306	350.795	316.258
C16orf93	5.89945	-1.26695	1.00335	-1.26272	0.206688	0.383733	3.3999	8.39899	0	6.08804	4.11168	13.2563	10.0803	1.86034
C16orf95	79.383	-0.191841	0.228797	-0.838476	0.401764	0.595351	74.1463	84.6197	68.9679	77.4051	76.066	72.9097	90.7229	90.2265
C17orf100	132.954	0.166556	0.186217	0.89442	0.371097	0.566853	140.574	125.334	155.974	138.285	127.462	132.563	129.028	114.411
C17orf104	52.0947	-0.0913459	0.280735	-0.325382	0.744892	0.861254	50.5221	53.6674	60.4796	41.7466	49.3401	56.3393	54.4337	50.2292
C17orf107	5.77982	0.403334	0.946306	0.426219	0.669948	0.810086	6.56511	4.99452	5.30522	11.3064	3.08376	1.10469	11.0884	2.79051
C17orf47	8.30172	1.63818	0.707373	2.31587	0.0205653	0.0714881	12.5463	4.05719	12.7325	15.655	9.25127	4.41877	4.03213	3.72068
C17orf50	1.95217	-1.09161	1.4525	-0.751535	0.452331	NA	1.2234	2.68093	1.06104	2.60916	0	3.31408	1.00803	3.72068
C17orf51	21.4948	-0.149983	0.464374	-0.322979	0.746711	0.862573	20.3257	22.664	10.6104	22.6127	27.7538	22.0938	28.2249	17.6732
C17orf53	332.811	0.151273	0.145857	1.03713	0.299674	0.493029	350.145	315.478	293.909	361.803	394.721	313.733	315.514	317.188
C17orf58	926.782	0.218027	0.0953574	2.28641	0.02223	0.0757314	996.882	856.683	1011.18	967.998	1011.47	852.822	832.634	884.592
C17orf59	130.04	-0.417607	0.198293	-2.10601	0.0352037	0.107349	111.249	148.832	98.6772	126.109	108.959	129.249	169.349	147.897
C17orf62	1109.24	-0.45717	0.135665	-3.36984	0.000752127	0.00524899	934.714	1283.76	771.38	991.481	1041.28	1218.48	1438.46	1194.34
C17orf67	56.7099	0.832695	0.2869	2.90239	0.00370332	0.0188025	72.7638	40.6559	88.0667	69.5776	60.6472	32.0361	44.3534	45.5783
C17orf74	5.66409	-0.579019	0.850346	-0.680922	0.495921	0.675465	4.52472	6.80345	4.24418	5.21832	4.11168	5.52346	12.0964	2.79051
C17orf75	691.782	0.0584837	0.116965	0.500011	0.617067	0.772289	705.818	677.746	774.563	675.772	667.119	732.411	632.036	668.792
C17orf78	4.15608	-0.151961	0.903116	-0.168263	0.866376	NA	3.94491	4.36725	4.24418	3.47888	4.11168	4.41877	4.03213	4.65085
C17orf80	823.545	0.0707908	0.0995812	0.710886	0.477155	0.661125	843.805	803.285	879.606	847.977	803.833	784.331	825.578	799.946
C17orf82	27.3342	-1.38191	0.482276	-2.8654	0.00416487	0.0205346	15.0058	39.6627	8.48836	25.2219	11.3071	29.8267	58.4658	30.6956
C17orf85	2266.68	-0.0207855	0.0803921	-0.258551	0.795981	0.892595	2250.29	2283.08	2283.37	2282.14	2185.36	2283.4	2283.19	2282.64
C17orf89	348.01	-0.243112	0.158611	-1.53275	0.125337	0.269776	319.178	376.842	352.267	283.529	321.739	307.104	412.285	411.135
C17orf96	830.966	0.412588	0.116305	3.54747	0.000388949	0.00304686	949.212	712.72	915.682	907.118	1024.84	648.454	789.289	700.418
C17orf97	79.2541	-0.111644	0.227539	-0.490658	0.623669	0.777507	76.2601	82.248	79.5784	66.9684	82.2335	87.2707	77.6185	81.855
C18orf21	351.121	0.395994	0.15341	2.58127	0.00984366	0.0408403	399.033	303.208	465.799	359.194	372.107	341.35	276.201	292.073
C18orf25	1061.13	0.231635	0.100143	2.31304	0.0207205	0.0719085	1146.03	976.225	1213.84	1170.64	1053.62	988.699	982.831	957.145
C18orf54	280.571	0.229592	0.137473	1.67009	0.0949006	0.221031	303.091	258.051	310.886	281.789	316.599	246.346	258.056	269.749
C18orf61	18.772	3.52446	0.644551	5.46808	4.55e-08	1.33e-06	34.579	2.96503	32.8924	40.0071	30.8376	3.31408	0	5.58102
C18orf65	12.8285	-0.158364	0.677466	-0.23376	0.815172	0.903218	12.1688	13.4883	16.9767	11.3064	8.22335	13.2563	3.0241	24.1844
C18orf8	829.414	0.284665	0.0970809	2.93225	0.00336518	0.0173987	911.028	747.8	885.972	904.509	942.602	744.562	738.887	759.949
C19orf12	441.913	-0.0238934	0.119882	-0.199308	0.842022	0.91957	438.127	445.699	428.662	453.994	431.726	433.039	480.831	423.227
C19orf18	1.75674	0.694849	1.61405	0.430501	0.666832	NA	2.1569	1.35657	2.12209	4.3486	0	2.20938	0	1.86034
C19orf24	128.65	-1.20993	0.244563	-4.94732	7.52e-07	1.56e-05	77.5504	179.749	66.8458	88.7114	77.0939	139.191	241.928	158.129
C19orf25	173.095	-1.22205	0.22644	-5.3968	6.78e-08	1.93e-06	103.721	242.47	87.0057	118.282	105.876	201.054	323.578	202.777
C19orf26	51.6369	-1.25711	0.459183	-2.73771	0.00618679	0.0282095	30.3826	72.8911	9.5494	37.398	44.2005	50.8158	113.908	53.9499
C19orf35	2.46111	1.9738	1.34739	1.4649	0.142948	NA	3.93387	0.988344	3.18313	3.47888	5.13959	1.10469	0	1.86034
C19orf38	9.3994	-0.640177	0.66765	-0.958852	0.337634	0.534627	7.29208	11.5067	4.24418	10.4366	7.19543	9.94223	17.1365	7.44136
C19orf43	2235.64	0.11885	0.0999879	1.18865	0.234579	0.418528	2328.21	2143.07	2443.59	2239.53	2301.51	1926.58	2211.62	2291.01
C19orf44	126.823	-0.540629	0.211022	-2.56196	0.0104085	0.0425283	103.269	150.377	89.1278	114.803	105.876	123.726	180.438	146.967
C19orf45	29.6997	0.0487858	0.411416	0.11858	0.905608	0.95301	30.1838	29.2156	23.343	26.0916	41.1168	28.722	40.3213	18.6034
C19orf47	200.312	-0.481783	0.175685	-2.74231	0.00610082	0.0278585	166.992	233.631	131.57	184.381	185.025	224.252	245.96	230.682
C19orf48	2153.33	-0.584866	0.16272	-3.59431	0.000325251	0.0026334	1722.55	2584.11	1270.07	1843.81	2053.78	2366.25	2955.55	2430.53
C19orf52	398.421	-0.0370881	0.135826	-0.273057	0.78481	0.885861	393.616	403.227	413.807	377.458	389.581	346.873	440.51	422.297
C19orf53	1501.44	-0.444465	0.136929	-3.24595	0.00117061	0.00750825	1271.97	1730.91	1045.13	1285.45	1485.34	1560.93	1884.01	1747.79
C19orf54	717.676	0.0542116	0.125283	0.432713	0.665223	0.806982	731.009	704.343	619.65	759.265	814.112	692.642	722.759	697.627
C19orf57	106.68	-0.300627	0.213737	-1.40653	0.159567	0.320934	95.4803	117.88	82.7615	100.888	102.792	117.097	136.084	100.458
C19orf60	142.154	-0.79618	0.240129	-3.31563	0.000914372	0.00611987	103.566	180.741	72.151	140.895	97.6523	167.913	209.671	164.64
C19orf66	1740.3	3.22387	0.103273	31.2169	6.29e-214	2.27e-211	3144.29	336.305	2941.22	3191	3300.65	326.989	326.602	355.325
C19orf68	302.174	-0.0729316	0.156225	-0.466837	0.640617	0.789065	294.69	309.659	268.444	300.053	315.571	255.184	341.723	332.071
C19orf70	294.958	-0.670565	0.207945	-3.22473	0.00126093	0.00799794	227.516	362.401	198.415	248.74	235.393	292.743	494.944	299.515
C19orf71	78.3219	-0.651036	0.350304	-1.85849	0.0630995	0.165522	60.8646	95.7791	28.6482	74.7959	79.1498	67.3862	126.004	93.9472
C19orf73	10.1488	-0.583855	0.605826	-0.963734	0.33518	0.532425	8.09387	12.2038	5.30522	8.6972	10.2792	14.361	11.0884	11.162
C19orf80	51.5718	-0.742188	0.281813	-2.63362	0.00844811	0.036292	38.5656	64.5781	36.0755	42.6163	37.0051	61.8628	57.4578	74.4136
C19orf81	4.95189	-1.29042	0.89671	-1.43906	0.150133	NA	2.84218	7.0616	2.12209	4.3486	2.05584	5.52346	10.0803	5.58102
C1D	617.019	0.485014	0.154321	3.1429	0.00167286	0.0100017	719.901	514.138	901.888	646.202	611.612	536.88	506.032	499.501
C1GALT1	313.951	0.31228	0.136092	2.29461	0.0217552	0.0745887	347.71	280.191	363.938	368.761	310.432	280.592	277.209	282.772
C1GALT1C1	556.157	0.663329	0.139493	4.75529	1.98e-06	3.62e-05	681.88	430.435	778.807	585.321	681.51	475.018	404.221	412.065
C1GALT1C1L	37.6535	0.616378	0.336281	1.83293	0.0668134	0.172662	45.6216	29.6853	53.0522	36.5282	47.2843	34.2455	23.1847	31.6258
C1QBP	3962.59	0.129305	0.0916182	1.41135	0.158141	0.318823	4140.42	3784.76	4495.65	3998.97	3926.65	3719.5	3672.26	3962.52
C1QL1	24.6623	0.567424	0.419052	1.35407	0.175716	0.342322	29.3486	19.9759	19.0988	39.1374	29.8096	22.0938	20.1606	17.6732
C1QL3	6.85746	0.414938	0.77465	0.535646	0.592203	0.752792	7.78436	5.93057	8.48836	8.6972	6.16751	11.0469	3.0241	3.72068
C1QL4	47.7191	-0.776302	0.332689	-2.33342	0.0196262	0.0690903	35.2049	60.2332	29.7093	34.7888	41.1168	43.083	83.6666	53.9499
C1QTNF1	2.37842	-0.925085	1.26457	-0.731543	0.464448	NA	1.62982	3.12702	2.12209	1.73944	1.02792	4.41877	4.03213	0.93017
C1QTNF3	58.4514	0.225521	0.271379	0.831016	0.405965	0.599009	62.9714	53.9314	68.9679	58.2712	61.6751	66.2815	44.3534	51.1593
C1QTNF3-AMACR	3.87322	-0.428203	0.983812	-0.435249	0.663382	NA	3.30132	4.44511	3.18313	2.60916	4.11168	4.41877	7.05622	1.86034
C1QTNF6	2442.63	-0.371444	0.144115	-2.57741	0.00995438	0.0411347	2129.65	2755.6	1682.82	2315.19	2390.94	2573.93	3146.07	2546.81
C1QTNF9B-AS1	9.89536	-0.0135591	0.644703	-0.0210315	0.983221	0.990612	9.82227	9.96846	4.24418	13.9155	11.3071	7.73284	10.0803	12.0922
C1R	130.732	1.85994	0.212634	8.74711	2.19e-18	1.67e-16	205.225	56.2381	188.866	196.557	230.254	45.2924	56.4498	66.9722
C1RL	30.1389	0.383914	0.367298	1.04524	0.295914	0.489319	34.0809	26.1968	38.1976	32.1796	31.8655	34.2455	20.1606	24.1844
C1RL-AS1	16.0923	-0.15784	0.486836	-0.324216	0.745775	0.861825	15.2261	16.9585	16.9767	17.3944	11.3071	14.361	15.1205	21.3939
C1S	19.1064	0.0694738	0.516081	0.134618	0.892914	0.946178	19.6056	18.6072	14.8546	18.2641	25.698	8.83754	30.241	16.7431
C1orf101	2.93241	1.78663	1.24106	1.43959	0.149982	NA	4.56642	1.2984	3.18313	4.3486	6.16751	1.10469	0	2.79051
C1orf106	20.9534	0.577913	0.460542	1.25485	0.209532	0.387268	24.9804	16.9264	22.2819	26.9613	25.698	26.5126	13.1044	11.162
C1orf109	535.763	0.077282	0.114568	0.674553	0.49996	0.678667	550.296	521.231	587.819	547.054	516.015	499.321	521.152	543.219
C1orf111	17.8911	-0.701395	0.544358	-1.28848	0.197578	0.372252	13.5648	22.2174	4.24418	20.0036	16.4467	16.5704	22.1767	27.9051
C1orf112	1127.22	0.228341	0.0959015	2.38099	0.017266	0.062672	1216.12	1038.31	1255.22	1180.21	1212.94	1101.38	1020.13	993.422
C1orf115	273.167	0.179028	0.16705	1.07171	0.283852	0.474953	290.386	255.949	351.206	260.916	259.036	245.242	238.904	283.702
C1orf116	1.90531	1.44298	1.55587	0.927443	0.353696	NA	2.79633	1.0143	5.30522	0	3.08376	1.10469	1.00803	0.93017
C1orf122	459.31	-0.015452	0.116811	-0.132282	0.894761	0.947143	457.018	461.601	491.264	435.73	444.061	461.761	461.679	461.364
C1orf123	544.871	0.0601127	0.124884	0.481348	0.630269	0.781682	556.407	533.336	622.833	508.786	537.602	563.393	498.976	537.638
C1orf127	6.05598	-1.35999	0.890796	-1.52671	0.126833	0.272468	3.42887	8.68309	5.30522	0.86972	4.11168	13.2563	9.07229	3.72068
C1orf131	472.163	0.277101	0.119802	2.31299	0.0207233	0.0719085	517.576	426.75	541.133	507.916	503.68	419.783	398.173	462.294
C1orf145	109.559	0.128513	0.217972	0.589584	0.55547	0.72499	114.341	104.777	94.433	136.546	112.043	90.5848	114.916	108.83
C1orf159	155.468	-1.11016	0.266502	-4.16568	3.1e-05	0.000370057	98.1845	212.751	61.5406	126.109	106.904	187.798	280.233	170.221
C1orf162	18.669	-0.250415	0.462472	-0.541471	0.588183	0.749585	17.0583	20.2797	23.343	16.5247	11.3071	20.9891	22.1767	17.6732
C1orf168	2.89109	-1.33047	1.22922	-1.08237	0.279087	NA	1.64086	4.14132	3.18313	1.73944	0	5.52346	5.04016	1.86034
C1orf174	631.545	-0.0208627	0.109612	-0.190333	0.849049	0.924064	627.205	635.884	658.909	624.459	598.249	604.267	629.012	674.373
C1orf189	2.08077	1.00844	1.57047	0.642127	0.52079	NA	2.78528	1.37626	4.24418	0	4.11168	1.10469	3.0241	0
C1orf194	45.3403	0.377635	0.305969	1.23423	0.217118	0.39679	51.1163	39.5644	46.686	52.1832	54.4797	48.6065	40.3213	29.7654
C1orf195	2.47505	2.63624	1.45139	1.81635	0.0693167	NA	4.24586	0.704241	5.30522	4.3486	3.08376	1.10469	1.00803	0
C1orf198	688.251	0.00568226	0.104462	0.0543953	0.95662	0.978778	689.556	686.946	675.886	712.301	680.482	656.187	723.767	680.884
C1orf204	4.56815	0.615467	0.911249	0.675411	0.499415	NA	5.56369	3.57261	5.30522	5.21832	6.16751	1.10469	4.03213	5.58102
C1orf21	1928.93	0.206372	0.0892807	2.31149	0.0208058	0.0720656	2066.78	1791.08	2169.84	2011.66	2018.83	1844.84	1701.56	1826.85
C1orf210	265.217	-0.000114212	0.147613	-0.000773725	0.999383	0.999705	265.438	264.996	253.59	248.74	293.985	240.823	274.185	279.981
C1orf216	827.512	0.313037	0.113365	2.76133	0.0057567	0.0266239	917.314	737.709	1011.18	816.667	924.099	729.097	739.895	744.136
C1orf220	61.1288	0.0353787	0.286357	0.123547	0.901674	0.95145	61.8797	60.3778	67.9069	59.1409	58.5914	72.9097	40.3213	67.9024
C1orf226	515.382	-0.419697	0.133049	-3.15445	0.00160801	0.00971123	440.52	590.244	372.427	489.652	459.48	611.999	598.771	559.962
C1orf228	12.4258	-0.198103	0.562603	-0.352119	0.724749	0.847242	11.5686	13.2829	7.42731	13.9155	13.3629	8.83754	16.1285	14.8827
C1orf229	18.3087	-0.682433	0.544932	-1.25233	0.210451	0.388237	13.9847	22.6327	11.6715	20.0036	10.2792	16.5704	38.3052	13.0224
C1orf233	362.702	-1.40501	0.458827	-3.06218	0.00219729	0.0124901	198.783	526.622	109.288	226.997	260.063	414.26	747.96	417.646
C1orf234	1.96408	0.392543	1.33733	0.293526	0.76912	NA	2.20963	1.71854	2.12209	3.47888	1.02792	2.20938	2.01606	0.93017
C1orf27	1483.44	0.284007	0.0905088	3.1379	0.00170165	0.0101387	1629	1337.89	1614.91	1603.76	1668.31	1385.28	1261.05	1367.35
C1orf35	306.857	-0.647511	0.179095	-3.61546	0.000299819	0.00246086	239.088	374.625	178.256	240.912	298.096	352.397	390.108	381.37
C1orf43	7519.29	-0.04982	0.0739409	-0.673781	0.500451	0.679274	7389.81	7648.77	7519.62	7183.02	7466.8	7511.91	7660.03	7774.36
C1orf50	145.163	0.290944	0.179555	1.62036	0.105155	0.237536	159.973	130.353	168.706	142.634	168.579	120.411	132.052	138.595
C1orf52	370.878	0.25001	0.151311	1.65229	0.0984755	0.226704	402.905	338.851	473.226	387.025	348.465	373.386	318.538	324.629
C1orf53	24.4558	-0.52603	0.401728	-1.30942	0.190392	0.362498	20.1114	28.8003	25.4651	17.3944	17.4746	28.722	24.1928	33.4861
C1orf54	49.3799	1.1942	0.307045	3.88933	0.000100523	0.000990615	68.6999	30.0598	77.4563	66.9684	61.6751	36.4548	21.1687	32.5559
C1orf56	226.52	-0.227588	0.151211	-1.5051	0.132298	0.280442	208.799	244.241	220.697	193.948	211.751	239.718	265.112	227.892
C1orf61	38.8706	-0.0167331	0.319257	-0.0524125	0.9582	0.979194	38.7528	38.9884	41.3807	34.7888	40.0888	34.2455	35.2811	47.4387
C1orf64	4.16053	-1.12816	0.983671	-1.14689	0.251428	NA	2.61604	5.70503	3.18313	2.60916	2.05584	3.31408	10.0803	3.72068
C1orf68	3.26069	-0.458251	1.1518	-0.397857	0.690735	NA	2.77424	3.74714	3.18313	0	5.13959	4.41877	4.03213	2.79051
C1orf74	138.162	0.121426	0.199261	0.609379	0.542273	0.714121	143.976	132.348	148.546	126.109	157.272	156.866	110.884	129.294
C1orf95	4.53294	-0.605784	1.01711	-0.595593	0.551447	NA	3.63292	5.43295	2.12209	2.60916	6.16751	1.10469	4.03213	11.162
C2	15.4821	-0.53855	0.53743	-1.00208	0.316303	0.51139	12.7199	18.2443	11.6715	6.95776	19.5305	13.2563	19.1526	22.3241
C20orf144	8.72321	-0.66271	0.685675	-0.966508	0.33379	0.531088	6.73435	10.7121	6.36627	8.6972	5.13959	6.62815	17.1365	8.37153
C20orf194	579.263	0.352994	0.11056	3.19279	0.00140905	0.00876196	649.788	508.738	628.139	681.86	639.366	479.436	522.161	524.616
C20orf195	2.90357	2.29135	1.4327	1.59933	0.109748	NA	4.81879	0.988344	2.12209	11.3064	1.02792	1.10469	0	1.86034
C20orf196	52.7445	0.145806	0.305596	0.477121	0.633276	0.78388	55.5559	49.9331	60.4796	54.7924	51.3959	32.0361	55.4418	62.3214
C20orf24	10.5762	-0.306359	0.602871	-0.508166	0.611337	0.767932	9.47795	11.6745	11.6715	9.56692	7.19543	7.73284	16.1285	11.162
C20orf27	1066.47	-0.992493	0.161896	-6.13044	8.76e-10	3.42e-08	713.152	1419.78	560.232	806.23	772.995	1254.93	1709.62	1294.8
C20orf96	164.083	-0.121622	0.177091	-0.686774	0.492225	0.672224	157.087	171.079	175.072	157.419	138.769	191.112	160.277	161.85
C21orf140	23.9153	0.140627	0.416844	0.337361	0.735845	0.854741	25.0373	22.7933	20.1599	31.3099	23.6421	17.6751	30.241	20.4637
C21orf2	783.579	-0.511973	0.162863	-3.14358	0.00166896	0.00998227	645.832	921.326	511.424	704.473	721.599	794.274	1102.79	866.918
C21orf33	3302.11	-0.182349	0.0820684	-2.22192	0.0262888	0.0857923	3094.04	3510.17	3139.63	2963.14	3179.35	3406.87	3629.92	3493.72
C21orf58	1150.69	-0.645308	0.127607	-5.05701	4.26e-07	9.65e-06	897.401	1403.98	820.188	931.47	940.546	1292.49	1645.11	1274.33
C21orf59	1001.16	0.110782	0.0940417	1.178	0.238795	0.423872	1039.69	962.634	1072.72	1029.75	1016.61	967.71	931.421	988.771
C21orf62	47.6636	-0.0864484	0.321555	-0.268845	0.788049	0.887355	46.2906	49.0365	41.3807	46.0952	51.3959	33.1408	66.5301	47.4387
C21orf62-AS1	15.1264	0.120347	0.534558	0.225133	0.821875	0.907943	15.8393	14.4136	20.1599	7.82748	19.5305	12.1516	17.1365	13.9525
C21orf91	273.878	0.164798	0.150662	1.09382	0.274033	0.463874	289.193	258.564	282.238	302.663	282.678	285.011	271.161	219.52
C22orf15	5.80821	-1.38813	0.878342	-1.58039	0.114017	0.25218	3.18482	8.4316	2.12209	4.3486	3.08376	5.52346	15.1205	4.65085
C22orf23	108.494	-0.195502	0.200471	-0.975214	0.329454	0.526617	101.062	115.927	92.3109	100.888	109.987	128.144	109.875	109.76
C22orf24	6.30248	0.312569	0.774953	0.403339	0.686699	0.821572	6.97153	5.63343	6.36627	10.4366	4.11168	4.41877	5.04016	7.44136
C22orf29	711.385	-0.298435	0.119101	-2.50574	0.0122195	0.0482838	638.137	784.632	589.941	635.765	688.706	718.05	862.875	772.971
C22orf39	433	0.0950083	0.125565	0.756644	0.449263	0.637101	447.607	418.393	485.959	403.55	453.312	404.317	418.333	432.529
C22orf46	1043.7	0.166269	0.0927586	1.7925	0.0730535	0.183919	1103.91	983.484	1086.51	1108.89	1116.32	953.349	975.775	1021.33
C2CD2	19.4928	1.51017	0.459873	3.2839	0.00102383	0.00670501	28.8488	10.1367	31.8313	26.9613	27.7538	9.94223	12.0964	8.37153
C2CD2L	651.188	-0.480794	0.141297	-3.40271	0.000667217	0.00475051	543.307	759.068	445.639	587.061	597.221	787.645	811.466	678.094
C2CD3	1082.88	0.0836565	0.117758	0.710407	0.477452	0.661241	1113.94	1051.82	957.062	1192.39	1192.39	1050.56	1106.82	998.072
C2CD4A	1.99436	1.57878	1.46666	1.07645	0.281727	NA	3.00037	0.988344	2.12209	1.73944	5.13959	1.10469	0	1.86034
C2CD4C	77.9493	-0.697641	0.257106	-2.71344	0.00665896	0.0299316	59.4098	96.4887	50.9302	68.7079	58.5914	74.0144	115.924	99.5282
C2CD4D	35.756	-0.126434	0.333003	-0.379677	0.704185	0.833408	34.0867	37.4252	28.6482	41.7466	31.8655	40.8736	33.2651	38.137
C2CD5	2532.46	0.234883	0.0837789	2.8036	0.0050535	0.023979	2738.17	2326.75	2862.7	2721.35	2630.44	2377.3	2270.09	2332.87
C2orf15	264.803	-0.16257	0.155135	-1.04793	0.294672	0.487851	249.843	279.764	282.238	256.567	210.723	296.057	265.112	278.121
C2orf16	63.2184	-0.542934	0.261181	-2.07876	0.0376392	0.113085	51.3841	75.0527	44.5639	53.0529	56.5355	76.2238	85.6827	63.2516
C2orf27A	107.355	0.421879	0.22148	1.90482	0.0568037	0.153517	122.96	91.7508	127.325	101.757	139.797	108.26	78.6265	88.3661
C2orf42	270.371	0.192958	0.140668	1.37172	0.17015	0.33467	288.566	252.177	292.848	269.613	303.236	258.498	233.863	264.168
C2orf44	456.787	0.0111159	0.12689	0.0876031	0.930192	0.965332	458.325	455.249	404.258	489.652	481.066	467.285	432.446	466.015
C2orf47	711.68	0.190599	0.127039	1.50032	0.133533	0.282212	758.892	664.467	857.324	679.251	740.102	638.512	729.815	625.074
C2orf48	78.6538	0.187387	0.242218	0.77363	0.439149	0.628902	83.781	73.5266	88.0667	68.7079	94.5685	85.0613	68.5462	66.9722
C2orf49	926.734	0.180211	0.100096	1.80039	0.0717995	0.181765	984.317	869.151	994.199	1002.79	955.965	925.732	818.522	863.198
C2orf50	19.9025	1.11172	0.466691	2.38213	0.0172129	0.0625389	27.2845	12.5205	23.343	28.7008	29.8096	6.62815	15.1205	15.8129
C2orf54	9.54851	-0.0576962	0.67809	-0.0850862	0.932193	0.966569	9.3352	9.76183	10.6104	6.08804	11.3071	16.5704	8.06426	4.65085
C2orf66	4.23897	0.259754	1.03669	0.25056	0.802154	NA	4.5885	3.88944	5.30522	4.3486	4.11168	6.62815	5.04016	0
C2orf68	1325.01	0.171961	0.100125	1.71745	0.0858962	0.206026	1404.27	1245.76	1532.15	1295.01	1385.63	1237.26	1236.86	1263.17
C2orf69	913.597	0.0971609	0.0998403	0.973163	0.330472	0.527756	944.382	882.812	1003.75	911.466	917.932	914.685	877.996	855.756
C2orf70	1.87669	-0.768975	1.58052	-0.486532	0.62659	NA	1.41473	2.33865	4.24418	0	0	2.20938	2.01606	2.79051
C2orf72	220.25	0.172199	0.156075	1.10331	0.269892	0.459209	233.439	207.06	215.392	233.085	251.84	187.798	227.815	205.568
C2orf74	395.378	0.204381	0.138534	1.47531	0.140128	0.292566	423.55	367.206	489.142	382.677	398.833	378.909	348.779	373.928
C2orf76	188.891	-0.0237686	0.190302	-0.124899	0.900603	0.950738	187.53	190.252	220.697	154.81	187.081	208.787	158.261	203.707
C2orf81	168.915	-0.784436	0.202227	-3.87898	0.000104895	0.00102653	124.191	213.639	111.41	118.282	142.881	172.332	262.088	206.498
C2orf82	4.81563	-2.00286	1.01332	-1.97654	0.0480941	NA	1.89764	7.73362	0	2.60916	3.08376	5.52346	12.0964	5.58102
C2orf88	25.832	-0.290697	0.388584	-0.748092	0.454404	0.641281	23.2189	28.4451	20.1599	21.743	27.7538	34.2455	23.1847	27.9051
C3	25.7182	-0.488468	0.381292	-1.28109	0.200163	0.375529	21.4598	29.9766	23.343	17.3944	23.6421	30.9314	29.2329	29.7654
C3AR1	1.97038	1.565	1.43653	1.08943	0.275963	NA	2.95868	0.982078	3.18313	2.60916	3.08376	0	2.01606	0.93017
C3orf14	5730.53	0.26373	0.0959867	2.74756	0.00600402	0.0275517	6253.09	5207.96	6954.09	5851.48	5953.71	5364.38	5054.27	5205.23
C3orf17	1777.3	0.174207	0.0996368	1.74842	0.0803919	0.196359	1884.47	1670.13	1982.03	1849.89	1821.47	1781.87	1516.08	1712.44
C3orf18	17.6784	-0.682731	0.520947	-1.31056	0.190008	0.361943	13.6424	21.7145	11.6715	8.6972	20.5584	14.361	31.249	19.5336
C3orf20	5.9014	0.444402	0.819909	0.542014	0.587809	0.749441	6.80917	4.99363	8.48836	7.82748	4.11168	5.52346	2.01606	7.44136
C3orf33	195.966	0.118755	0.159218	0.745863	0.45575	0.642771	204.133	187.798	220.697	197.426	194.277	191.112	171.365	200.917
C3orf35	28.9242	0.259006	0.35884	0.721788	0.470425	0.655422	31.5286	26.3198	36.0755	28.7008	29.8096	28.722	24.1928	26.0448
C3orf38	867.803	0.381493	0.107001	3.56532	0.000363419	0.00288664	981.899	753.706	1037.7	908.857	999.137	799.797	746.952	714.371
C3orf49	38.1379	0.150352	0.327395	0.459236	0.646064	0.792568	40.0066	36.2691	40.3197	47.8346	31.8655	41.9783	34.2731	32.5559
C3orf52	273.428	0.553643	0.136248	4.0635	4.83e-05	0.000538628	325.197	221.659	307.703	334.842	333.046	223.148	216.727	225.101
C3orf58	619.005	0.350433	0.130428	2.68679	0.00721427	0.0319466	693.829	544.18	779.868	620.11	681.51	600.952	530.225	501.362
C3orf62	189.914	0.351639	0.162705	2.1612	0.0306801	0.0967268	212.97	166.859	223.88	210.472	204.556	176.751	146.165	177.662
C3orf67	99.4292	0.0779826	0.203125	0.383914	0.701042	0.831427	102.062	96.7967	99.7382	102.627	103.82	104.946	88.7068	96.7377
C3orf70	26.6029	0.100734	0.458849	0.219536	0.826233	0.911116	27.4399	25.7659	18.0378	36.5282	27.7538	22.0938	40.3213	14.8827
C3orf80	21.5709	0.0463539	0.420147	0.110328	0.912149	0.956433	21.9256	21.2161	27.5872	21.743	16.4467	22.0938	20.1606	21.3939
C4orf19	193.893	-0.0314432	0.172215	-0.182581	0.855127	0.927947	191.938	195.848	223.88	173.074	178.858	206.577	175.398	205.568
C4orf26	11.9357	0.334138	0.58202	0.574102	0.565899	0.733037	13.3218	10.5497	13.7936	8.6972	17.4746	14.361	7.05622	10.2319
C4orf27	458.776	0.256243	0.153085	1.67386	0.094159	0.219799	499.506	418.046	582.514	440.078	475.926	473.913	358.859	421.367
C4orf29	535.734	0.16919	0.109582	1.54396	0.122599	0.265483	567.035	504.432	572.964	579.233	548.909	516.996	482.847	513.454
C4orf3	4974.27	0.473045	0.0945522	5.003	5.64e-07	1.23e-05	5782.77	4165.77	6410.83	5411.4	5526.09	4251.96	4110.75	4134.61
C4orf32	864.553	0.538636	0.12277	4.38736	1.15e-05	0.000160866	1023.83	705.28	1085.45	1005.4	980.635	814.158	631.028	670.653
C4orf33	318.923	2.71867	0.171791	15.8255	2.08e-56	3.22e-54	553.551	84.295	614.345	514.874	531.434	101.632	67.5381	83.7153
C4orf36	31.1647	0.24612	0.374716	0.656817	0.511299	0.688578	33.883	28.4464	31.8313	28.7008	41.1168	20.9891	38.3052	26.0448
C4orf46	601.816	0.196389	0.112128	1.75148	0.0798636	0.195435	642.882	560.751	701.351	610.543	616.751	562.288	566.514	553.451
C4orf47	13.5503	0.197691	0.526849	0.375233	0.707487	0.835304	14.4508	12.6499	15.9157	13.0458	14.3909	15.4657	14.1124	8.37153
C4orf48	14.94	-2.73193	0.732157	-3.73134	0.000190464	0.00168444	3.90074	25.9793	0	3.47888	8.22335	18.7798	43.3454	15.8129
C5	439.188	0.142932	0.130645	1.09404	0.273936	0.46376	460.718	417.659	479.592	446.166	456.396	468.389	415.309	369.277
C5AR1	16.867	-0.22864	0.464593	-0.49213	0.622627	0.776396	15.4829	18.2511	13.7936	18.2641	14.3909	18.7798	20.1606	15.8129
C5AR2	98.7468	-1.07158	0.221439	-4.83918	1.3e-06	2.53e-05	63.4908	134.003	53.0522	69.5776	67.8426	152.448	123.988	125.573
C5orf15	2557.78	0.587444	0.110845	5.29967	1.16e-07	3.15e-06	3071.33	2044.23	3423.99	2877.9	2912.09	2263.51	1934.41	1934.75
C5orf22	1357.78	0.283302	0.10314	2.74678	0.00601835	0.0276012	1490.43	1225.13	1520.48	1431.56	1519.26	1354.35	1183.43	1137.6
C5orf24	2407.98	-0.0878866	0.0852108	-1.0314	0.302352	0.496459	2334.39	2481.57	2387.35	2382.16	2233.67	2589.4	2430.36	2424.95
C5orf28	391.134	0.128388	0.131473	0.976532	0.328801	0.526061	408.433	373.836	424.418	383.546	417.335	416.469	360.875	344.163
C5orf30	992.136	0.3479	0.099489	3.49687	0.000470754	0.0035486	1111.21	873.059	1183.06	1067.15	1083.43	894.801	889.084	835.293
C5orf34	329.038	0.150016	0.140098	1.07079	0.284264	0.475233	345.883	312.194	355.45	363.543	318.655	349.083	284.265	303.235
C5orf38	161.55	-0.605472	0.166568	-3.63499	0.000277993	0.00230488	128.147	194.953	129.447	129.588	125.406	185.588	207.655	191.615
C5orf42	315.128	0.00103781	0.130049	0.00798015	0.993633	0.996417	315.129	315.128	307.703	331.363	306.32	320.361	300.394	324.629
C5orf45	408.742	-0.295325	0.130736	-2.25895	0.0238867	0.0799366	366.991	450.493	337.412	362.673	400.888	444.086	487.887	419.507
C5orf51	1542.77	-0.00651673	0.0934316	-0.0697486	0.944394	0.972979	1538.95	1546.6	1527.9	1638.55	1450.39	1588.55	1496.93	1554.31
C5orf56	129.623	4.3025	0.299159	14.382	6.72e-47	9.22e-45	246.615	12.6302	242.979	218.3	278.566	16.5704	11.0884	10.2319
C5orf60	3.9271	-0.0379338	0.939521	-0.0403757	0.967794	NA	3.88114	3.97306	3.18313	4.3486	4.11168	3.31408	3.0241	5.58102
C5orf63	219.21	0.102256	0.15549	0.657635	0.510773	0.688049	227.139	211.281	235.552	210.472	235.393	216.52	188.502	228.822
C5orf66	295.297	0.132122	0.138377	0.954794	0.339682	0.536884	308.831	281.763	287.543	313.099	325.85	261.812	304.426	279.051
C6orf1	296.628	-0.273305	0.163598	-1.67059	0.0948033	0.220838	268.42	324.837	218.575	278.31	308.376	331.408	353.819	289.283
C6orf106	3852.77	0.14012	0.0760471	1.84254	0.0653967	0.169964	4039.89	3665.65	4028.79	4039.85	4051.03	3565.95	3695.44	3735.56
C6orf120	1174.33	0.233778	0.111535	2.09601	0.0360814	0.109336	1269.42	1079.25	1399.52	1190.65	1218.08	1148.88	983.839	1105.04
C6orf132	776.338	-0.383923	0.121182	-3.16815	0.00153411	0.00936698	673.421	879.255	599.49	716.649	704.124	830.728	971.743	835.293
C6orf136	587.742	-0.0892488	0.117845	-0.75734	0.448846	0.636679	569.922	605.561	566.598	519.223	623.947	575.545	617.924	623.214
C6orf141	894.577	-0.298728	0.114625	-2.60614	0.00915693	0.0386313	801.912	987.242	734.243	903.639	767.855	945.616	1029.2	986.91
C6orf163	18.0328	-0.0534458	0.453083	-0.11796	0.906099	0.953268	17.7631	18.3025	20.1599	15.655	17.4746	14.361	19.1526	21.3939
C6orf165	89.064	0.0555914	0.21595	0.257427	0.796849	0.893053	90.8332	87.2948	87.0057	87.8417	97.6523	79.5378	96.7711	85.5756
C6orf201	42.8259	-0.420136	0.328409	-1.27931	0.200789	0.376014	36.5642	49.0875	28.6482	46.0952	34.9492	37.5595	59.4739	50.2292
C6orf203	514.718	0.269182	0.140675	1.91351	0.0556832	0.151121	562.935	466.501	659.97	492.261	536.574	469.494	431.438	498.571
C6orf223	2.27653	-0.0632622	1.34327	-0.0470956	0.962437	NA	2.22067	2.33239	3.18313	3.47888	0	1.10469	4.03213	1.86034
C6orf226	72.7786	-0.470881	0.236335	-1.99243	0.0463237	0.131731	61.0534	84.5038	59.4185	60.0107	63.731	75.1191	93.747	84.6455
C6orf25	32.345	-0.396866	0.354139	-1.12065	0.262437	0.450985	27.8643	36.8257	23.343	30.4402	29.8096	35.3501	45.3614	29.7654
C6orf47	873.936	-0.0597804	0.118386	-0.504962	0.613585	0.769635	855.84	892.031	845.653	835.801	886.066	849.508	1020.13	806.457
C6orf48	2295.39	0.118715	0.102258	1.16094	0.245667	0.431971	2390.22	2200.57	2670.65	2244.75	2255.25	2135.37	2163.24	2303.1
C6orf52	42.3684	0.0951865	0.319885	0.297565	0.766035	0.874624	43.7833	40.9536	56.2354	39.1374	35.9772	43.083	45.3614	34.4163
C6orf62	3731.43	0.886125	0.110775	7.9993	1.25e-15	8.06e-14	4842.6	2620.26	5502.58	4571.25	4453.97	2836.85	2469.68	2554.25
C6orf7	3.46759	2.02984	1.1276	1.80014	0.0718385	NA	5.55264	1.38253	4.24418	5.21832	7.19543	2.20938	1.00803	0.93017
C6orf89	3101.23	0.0476876	0.0786081	0.606649	0.544084	0.715473	3152.45	3050	3069.6	3129.25	3258.5	3072.15	3036.19	3041.66
C6orf99	30.1947	-0.311415	0.39136	-0.795727	0.426191	0.617292	26.9757	33.4137	39.2587	25.2219	16.4467	35.3501	33.2651	31.6258
C7orf13	347.006	-0.2513	0.130333	-1.92813	0.0538384	0.147507	316.711	377.3	287.543	324.406	338.185	381.119	387.084	363.696
C7orf25	473.591	0.291433	0.122604	2.37702	0.0174533	0.0631303	521.469	425.713	578.269	500.959	485.178	414.26	429.422	433.459
C7orf26	584.966	-0.27636	0.140731	-1.96374	0.04956	0.138523	529.068	640.864	442.456	555.751	588.998	571.126	697.558	653.91
C7orf34	2.56027	1.54332	1.27331	1.21205	0.225493	NA	3.8284	1.29213	3.18313	5.21832	3.08376	0	2.01606	1.86034
C7orf43	496.523	-0.552533	0.143097	-3.86124	0.000112812	0.00108755	402.334	590.713	337.412	452.254	417.335	536.88	650.181	585.077
C7orf49	700.612	-0.188454	0.133141	-1.41544	0.156938	0.317497	655.021	746.203	576.147	614.892	774.023	718.05	791.305	729.253
C7orf50	1192.67	-0.960693	0.174656	-5.50048	3.79e-08	1.13e-06	809.347	1576	628.139	921.033	878.871	1367.61	1982.8	1377.58
C7orf55	35.6689	-0.287295	0.359094	-0.800054	0.423679	0.61486	32.1212	39.2166	29.7093	34.7888	31.8655	28.722	55.4418	33.4861
C7orf60	556.838	0.209015	0.120373	1.7364	0.0824933	0.199716	596.971	516.704	607.979	622.719	560.216	547.927	462.687	539.499
C7orf61	11.1686	-0.187861	0.613218	-0.306352	0.759337	0.870413	10.5017	11.8356	13.7936	4.3486	13.3629	13.2563	11.0884	11.162
C7orf62	1.85659	1.40517	1.71188	0.820832	0.411742	NA	2.67293	1.04025	1.06104	6.95776	0	1.10469	2.01606	0
C7orf73	2558.54	0.107168	0.118438	0.904844	0.365548	0.561472	2653.84	2463.25	3043.08	2306.5	2611.94	2622.54	2289.24	2477.97
C8G	9.93029	-0.665681	0.685669	-0.970849	0.331624	0.528779	7.62368	12.2369	3.18313	10.4366	9.25127	11.0469	19.1526	6.51119
C8orf33	2125.91	0.00710201	0.0862561	0.0823364	0.934379	0.968095	2131.21	2120.62	2135.88	2073.41	2184.33	2198.34	2012.03	2151.48
C8orf34	2.01488	0.45807	1.33638	0.342769	0.731772	NA	2.33718	1.69259	4.24418	1.73944	1.02792	2.20938	1.00803	1.86034
C8orf37	219.383	0.178894	0.160303	1.11598	0.264432	0.453708	232.746	206.02	199.476	253.088	245.673	208.787	216.727	192.545
C8orf37-AS1	3.8295	0.642184	1.08433	0.592239	0.553691	NA	4.69397	2.96503	5.30522	2.60916	6.16751	3.31408	0	5.58102
C8orf4	6.71562	1.74498	0.861177	2.02627	0.0427372	0.124102	10.3239	3.10733	16.9767	7.82748	6.16751	5.52346	1.00803	2.79051
C8orf44	62.1055	-0.105157	0.30631	-0.343302	0.731371	0.851926	59.95	64.261	77.4563	41.7466	60.6472	78.4331	47.3775	66.9722
C8orf46	86.325	-0.56066	0.22935	-2.44456	0.0145029	0.0550856	69.9081	102.742	79.5784	64.3593	65.7868	87.2707	114.916	106.039
C8orf48	11.1086	0.202625	0.599628	0.337919	0.735425	0.854509	11.9512	10.266	13.7936	8.6972	13.3629	5.52346	14.1124	11.162
C8orf58	333.783	-0.350829	0.132716	-2.64345	0.00820651	0.0353815	293.271	374.295	311.947	302.663	265.203	388.852	374.988	359.046
C8orf59	645.33	0.343205	0.137753	2.49144	0.0127226	0.0497902	721.848	568.811	850.958	639.244	675.343	619.732	533.249	553.451
C8orf76	219.166	0.378865	0.169593	2.23397	0.0254853	0.0838401	247.953	190.378	298.154	222.648	223.058	185.588	198.582	186.964
C8orf82	468.209	-0.583335	0.163636	-3.56482	0.000364106	0.00288773	374.825	561.593	327.863	395.723	400.888	448.505	675.381	560.893
C8orf86	2.85749	-1.77743	1.28876	-1.37918	0.16784	NA	1.27613	4.43884	1.06104	1.73944	1.02792	3.31408	9.07229	0.93017
C9orf106	54.2008	-0.380572	0.273457	-1.39171	0.164011	0.326612	47.0132	61.3885	42.4418	51.3135	47.2843	59.6534	70.5622	53.9499
C9orf114	889.029	-0.471833	0.156689	-3.01127	0.00260157	0.014243	744.728	1033.33	572.964	813.188	848.033	941.198	1178.39	980.399
C9orf116	135.901	-0.0322919	0.182572	-0.176872	0.859609	0.930598	134.55	137.252	136.875	126.979	139.797	129.249	129.028	153.478
C9orf117	61.8545	-0.632478	0.268132	-2.35883	0.0183325	0.0656223	48.3462	75.3627	41.3807	57.4015	46.2564	76.2238	85.6827	64.1817
C9orf131	2.7067	-0.814793	1.28857	-0.632325	0.527175	NA	1.95037	3.46303	0	1.73944	4.11168	4.41877	5.04016	0.93017
C9orf139	10.1445	-1.15169	0.661651	-1.74062	0.0817495	0.19841	6.21143	14.0776	4.24418	11.3064	3.08376	12.1516	16.1285	13.9525
C9orf142	670.843	-1.01841	0.18445	-5.52136	3.36e-08	1.02e-06	443.265	898.42	324.68	475.737	529.378	792.064	1096.74	806.457
C9orf152	76.5329	-0.542296	0.258905	-2.09458	0.0362085	0.109635	62.2842	90.7817	76.3952	65.229	45.2284	101.632	78.6265	92.0868
C9orf156	277.352	0.00405045	0.138786	0.0291849	0.976717	0.987914	277.898	276.805	296.032	253.958	283.706	285.011	269.145	276.26
C9orf16	284.24	-1.16428	0.222607	-5.23019	1.69e-07	4.34e-06	175.164	393.315	136.875	208.733	179.886	324.779	534.257	320.909
C9orf163	32.5692	-0.942814	0.359976	-2.6191	0.00881616	0.03752	22.2658	42.8726	22.2819	20.8733	23.6421	48.6065	48.3855	31.6258
C9orf171	5.41504	0.264932	0.852008	0.31095	0.755838	0.868347	5.95906	4.87101	5.30522	4.3486	8.22335	2.20938	4.03213	8.37153
C9orf172	9.47632	-2.3004	0.75146	-3.06124	0.00220423	0.0125089	3.14312	15.8095	3.18313	5.21832	1.02792	12.1516	23.1847	12.0922
C9orf173	20.0036	-1.71962	0.582311	-2.95309	0.00314615	0.0165194	9.2731	30.734	2.12209	11.3064	14.3909	18.7798	47.3775	26.0448
C9orf173-AS1	50.8132	-0.65105	0.306101	-2.12691	0.0334274	0.103295	39.437	62.1893	28.6482	49.574	40.0888	50.8158	71.5703	64.1817
C9orf24	1.91295	0.37213	1.64973	0.225571	0.821535	NA	2.14585	1.68005	1.06104	4.3486	1.02792	0	5.04016	0
C9orf3	245.964	-0.0268642	0.151554	-0.177259	0.859305	0.930529	243.773	248.154	220.697	233.085	277.538	237.509	253.016	253.936
C9orf40	313.867	0.333102	0.15147	2.19912	0.0278694	0.0898649	350.204	277.53	408.502	329.624	312.487	254.079	288.297	290.213
C9orf41	282.358	0.106194	0.143176	0.7417	0.458269	0.644917	292.564	272.152	289.665	321.796	266.231	280.592	254.024	281.842
C9orf41-AS1	11.388	-0.0952461	0.634081	-0.150211	0.880598	0.939625	10.9275	11.8486	11.6715	13.9155	7.19543	19.8845	10.0803	5.58102
C9orf43	35.821	0.214049	0.330517	0.64762	0.51723	0.693838	38.4033	33.2387	38.1976	40.0071	37.0051	40.8736	27.2169	31.6258
C9orf47	37.3664	0.318268	0.327226	0.972625	0.33074	0.527966	41.384	33.3488	43.5028	42.6163	38.033	41.9783	29.2329	28.8353
C9orf50	6.53838	-0.77624	0.797856	-0.972907	0.330599	0.52785	4.7619	8.31486	4.24418	6.95776	3.08376	12.1516	9.07229	3.72068
C9orf64	393.52	0.0270605	0.131311	0.20608	0.836729	0.91699	396.992	390.048	398.953	420.944	371.079	423.097	350.795	396.252
C9orf66	30.4427	-0.0354113	0.384182	-0.0921732	0.92656	0.963303	29.9709	30.9144	30.7703	36.5282	22.6142	32.0361	39.3132	21.3939
C9orf69	668.898	-0.55299	0.174882	-3.16208	0.00156647	0.00950106	542.277	795.519	427.601	521.832	677.399	700.375	948.558	737.625
C9orf72	42.0061	0.317227	0.306849	1.03382	0.30122	0.495049	46.6451	37.367	55.1743	42.6163	42.1447	39.7689	33.2651	39.0671
C9orf78	1806.6	0.139601	0.0900383	1.55046	0.121031	0.263209	1894.14	1719.05	1947.02	1915.99	1819.42	1661.46	1675.35	1820.34
C9orf84	7.34769	0.38302	0.764967	0.500701	0.616582	0.771958	8.35145	6.34394	14.8546	6.08804	4.11168	6.62815	4.03213	8.37153
C9orf85	212.176	0.131299	0.150158	0.874404	0.381898	0.577611	221.817	202.535	228.125	223.518	213.807	209.891	187.494	210.218
C9orf89	253.843	-0.620761	0.187555	-3.30976	0.000933759	0.00621212	199.954	307.731	155.974	215.691	228.198	265.126	366.924	291.143
C9orf9	40.398	-0.27461	0.319109	-0.860552	0.389485	0.584641	36.5159	44.2801	26.5261	40.8768	42.1447	41.9783	44.3534	46.5085
C9orf91	1270.22	0.763238	0.0882281	8.65074	5.12e-18	3.75e-16	1598.61	941.837	1605.36	1588.98	1601.5	932.36	966.703	926.449
CA11	571.837	0.0838453	0.110369	0.759682	0.447445	0.635272	588.593	555.082	567.659	584.452	613.668	539.09	538.289	587.867
CA12	4784.29	-0.106094	0.097256	-1.09088	0.275326	0.465151	4608.3	4960.28	4123.22	4644.3	5057.36	5028.56	4900.04	4952.23
CA13	4.53866	0.756162	0.940042	0.804391	0.421171	NA	5.72436	3.35295	10.6104	3.47888	3.08376	3.31408	3.0241	3.72068
CA14	75.4889	0.0971354	0.270401	0.359228	0.719425	0.843177	77.9976	72.9802	87.0057	79.1445	67.8426	66.2815	97.7791	54.88
CA2	17.4732	1.99198	0.528025	3.7725	0.000161619	0.00146695	27.9501	6.99627	26.5261	29.5705	27.7538	7.73284	3.0241	10.2319
CA4	96.8303	-0.117571	0.218909	-0.537076	0.591215	0.751905	92.9612	100.699	83.8225	97.4086	97.6523	82.8519	104.835	114.411
CA5B	205.342	0.00139819	0.157838	0.00885836	0.992932	0.995973	205.615	205.069	211.148	205.254	200.444	178.96	216.727	219.52
CA5BP1	101.759	-0.339125	0.223663	-1.51623	0.129461	0.276088	89.6394	113.879	71.09	99.1481	98.6802	131.458	107.859	102.319
CA8	493.639	-0.42	0.122934	-3.41646	0.000634415	0.00455868	422.443	564.835	456.249	400.941	410.14	594.324	515.104	585.077
CA9	261.887	0.176611	0.146698	1.20391	0.228624	0.411418	277.794	245.979	255.712	282.659	295.013	240.823	270.153	226.961
CAAP1	567.03	0.168384	0.118845	1.41684	0.156529	0.316774	600.218	533.842	658.909	549.663	592.081	561.184	523.169	517.175
CAB39	1220.56	0.248381	0.0929877	2.67112	0.0075599	0.0332588	1325.41	1115.72	1387.85	1321.97	1266.4	1134.52	1080.61	1132.02
CAB39L	316.79	0.0276742	0.132431	0.208972	0.83447	0.916129	319.937	313.642	321.497	327.884	310.432	296.057	304.426	340.442
CABIN1	1337.07	-0.336391	0.167231	-2.01154	0.0442687	0.127519	1181.68	1492.47	858.385	1363.72	1322.93	1304.64	1673.33	1499.43
CABLES1	1045.64	0.0138469	0.0979567	0.141357	0.887588	0.943315	1050.53	1040.76	984.65	1084.54	1082.4	1010.79	1083.63	1027.84
CABLES2	1072.73	-0.327819	0.138155	-2.37284	0.0176521	0.0636125	951.003	1194.46	763.952	1043.66	1045.39	1204.11	1287.26	1092.02
CABP1	3.72067	0.842688	1.05062	0.802088	0.422502	NA	4.77294	2.6684	5.30522	6.95776	2.05584	1.10469	5.04016	1.86034
CABP4	4.99708	0.809832	0.898966	0.900848	0.367669	NA	6.36963	3.62452	4.24418	8.6972	6.16751	1.10469	6.04819	3.72068
CABP7	1.96674	-1.06071	1.44645	-0.73332	0.463363	NA	1.26509	2.6684	0	1.73944	2.05584	1.10469	5.04016	1.86034
CABYR	114.944	-0.130832	0.215505	-0.607095	0.543788	0.715382	109.762	120.127	130.509	93.9297	104.848	139.191	117.94	103.249
CACFD1	408.419	-0.704669	0.206814	-3.40725	0.000656209	0.00468923	310.604	506.234	224.941	318.317	388.553	398.794	625.988	493.92
CACHD1	92.9093	-0.0211826	0.220523	-0.0960564	0.923476	0.961771	92.18	93.6385	92.3109	83.4931	100.736	108.26	91.7309	80.9248
CACNA1A	11.7763	-0.148714	0.554992	-0.267956	0.788733	0.887892	11.2132	12.3393	13.7936	9.56692	10.2792	11.0469	11.0884	14.8827
CACNA1B	4.59803	-0.282093	0.89198	-0.316255	0.751809	NA	4.11831	5.07776	3.18313	6.08804	3.08376	6.62815	3.0241	5.58102
CACNA1C	6.68834	0.116365	0.762285	0.152654	0.878672	0.939117	6.89671	6.47997	4.24418	11.3064	5.13959	7.73284	7.05622	4.65085
CACNA1C-AS2	1.79201	-3.20908	1.88641	-1.70115	0.0889146	NA	0.353682	3.23034	1.06104	0	0	0	5.04016	4.65085
CACNA1D	1992.69	-0.259228	0.125385	-2.06746	0.0386912	0.115132	1813.63	2171.75	1507.74	2100.37	1832.78	2144.21	2278.15	2092.88
CACNA1F	1.75471	2.08289	1.61879	1.28669	0.198201	NA	2.83113	0.678287	1.06104	4.3486	3.08376	1.10469	0	0.93017
CACNA1G	2.1354	0.595997	1.275	0.467447	0.64018	NA	2.55227	1.71854	2.12209	3.47888	2.05584	2.20938	2.01606	0.93017
CACNA1G-AS1	4.86469	0.444755	0.949251	0.468533	0.639404	NA	5.59433	4.13505	3.18313	4.3486	9.25127	4.41877	7.05622	0.93017
CACNA1H	1804.56	-1.0056	0.330473	-3.04289	0.00234316	0.013167	1199.8	2409.31	763.952	1461.13	1374.33	2054.73	3077.52	2095.67
CACNA1I	90.2908	-0.553997	0.249786	-2.21789	0.0265625	0.0865218	73.1024	107.479	57.2964	75.6656	86.3452	97.2129	134.068	91.1567
CACNA2D1	21.012	0.32155	0.431442	0.745293	0.456095	0.642907	23.3268	18.6972	25.4651	20.8733	23.6421	19.8845	23.1847	13.0224
CACNA2D2	108.227	-0.329277	0.219503	-1.5001	0.133589	0.282236	95.8357	120.619	76.3952	105.236	105.876	108.26	140.116	113.481
CACNA2D3	25.4752	-0.15389	0.399154	-0.38554	0.699838	0.830696	24.0494	26.9011	26.5261	26.0916	19.5305	35.3501	21.1687	24.1844
CACNA2D4	34.0176	-0.970668	0.388403	-2.49912	0.0124501	0.0489706	22.8625	45.1726	13.7936	32.1796	22.6142	35.3501	56.4498	43.718
CACNB1	189.646	-0.428792	0.176989	-2.4227	0.0154057	0.0576004	161.889	217.403	152.79	147.852	185.025	184.484	238.904	228.822
CACNB2	159.524	0.537999	0.168466	3.19351	0.00140555	0.00874372	189.063	129.985	198.415	176.553	192.221	123.726	135.076	131.154
CACNB3	1594.82	-0.276719	0.135741	-2.03857	0.0414925	0.121419	1442.17	1747.47	1160.78	1515.92	1649.81	1647.1	1905.18	1690.12
CACNB4	26.3043	0.624241	0.397115	1.57194	0.115965	0.25534	31.8967	20.7119	23.343	37.398	34.9492	19.8845	17.1365	25.1146
CACNG1	3.70411	-2.28352	1.18303	-1.93023	0.0535788	NA	1.21236	6.19587	0	2.60916	1.02792	7.73284	8.06426	2.79051
CACNG4	1815.27	-0.275301	0.124488	-2.21146	0.0270037	0.0876279	1642.34	1988.21	1375.11	1755.09	1796.8	1897.86	2180.37	1886.38
CACNG6	11.2788	4.41024	0.980227	4.4992	6.82e-06	0.000103385	21.5432	1.0143	21.2209	15.655	27.7538	1.10469	1.00803	0.93017
CACNG8	457.219	1.18102	0.13328	8.86117	7.92e-19	6.11e-17	634.977	279.461	640.871	628.807	635.254	235.299	293.337	309.747
CACTIN	164.495	-0.761866	0.221106	-3.44571	0.00056957	0.00417586	121.887	207.102	90.1888	135.676	139.797	185.588	258.056	177.662
CACTIN-AS1	7.68342	-0.781299	0.803886	-0.971902	0.331099	0.528322	5.68876	9.67809	2.12209	2.60916	12.335	6.62815	13.1044	9.3017
CACUL1	2159.1	0.0190554	0.0937409	0.203277	0.838918	0.917864	2173.45	2144.76	2355.52	2103.85	2060.98	2229.27	2079.57	2125.44
CACYBP	4868.94	0.194746	0.107127	1.81789	0.0690811	0.176524	5197.43	4540.46	5992.78	4765.2	4834.3	4521.5	4540.18	4559.69
CAD	6106.74	-0.692561	0.162533	-4.26105	2.03e-05	0.00025971	4668.17	7545.3	3318.95	5315.73	5369.85	7049.04	8345.5	7241.37
CADM1	400.055	0.325897	0.148544	2.19394	0.0282399	0.0907288	445.094	355.017	470.043	470.518	394.721	359.025	301.402	404.624
CADM4	324.021	-0.288151	0.136381	-2.11284	0.0346144	0.105946	291.784	356.258	265.261	285.268	324.822	349.083	369.948	349.744
CADPS	5.48166	-0.434217	0.845232	-0.513725	0.607444	0.76465	4.71605	6.24728	7.42731	2.60916	4.11168	3.31408	7.05622	8.37153
CADPS2	1085.73	0.363809	0.0968893	3.7549	0.000173412	0.00156031	1222.01	949.439	1307.21	1199.34	1159.49	951.14	946.542	950.634
CAGE1	4.269	0.340288	0.98183	0.346586	0.728903	NA	4.79087	3.74714	9.5494	1.73944	3.08376	4.41877	4.03213	2.79051
CAHM	10.8168	-0.481241	0.646164	-0.744767	0.456412	0.643179	9.02984	12.6037	11.6715	11.3064	4.11168	12.1516	7.05622	18.6034
CALB1	11.5873	0.162882	0.576616	0.282479	0.777576	0.881905	12.2563	10.9183	12.7325	14.7852	9.25127	6.62815	13.1044	13.0224
CALB2	690.472	-0.498121	0.101093	-4.92735	8.34e-07	1.7e-05	572.463	808.482	567.659	567.927	581.802	820.786	784.249	820.41
CALCOCO1	998.575	-0.112122	0.108053	-1.03766	0.299429	0.492783	959.839	1037.31	885.972	992.35	1001.19	947.826	1090.69	1073.42
CALCOCO2	1642.31	0.765488	0.0995766	7.68743	1.5e-14	9.25e-13	2068.24	1216.37	2267.45	1930.78	2006.5	1249.41	1178.39	1221.31
CALCR	14.9331	-1.64019	0.552827	-2.96691	0.00300804	0.0159399	7.29897	22.5673	7.42731	5.21832	9.25127	18.7798	31.249	17.6732
CALD1	44.6425	0.838351	0.310228	2.70237	0.00688477	0.0307861	57.3967	31.8883	62.6016	53.0529	56.5355	26.5126	28.2249	40.9275
CALHM1	22.4385	0.403915	0.422025	0.957087	0.338523	0.535543	25.5798	19.2971	19.0988	27.831	29.8096	16.5704	17.1365	24.1844
CALHM2	498.175	-0.404737	0.144732	-2.79646	0.00516665	0.0243966	428.746	567.605	375.61	447.036	463.591	487.169	649.173	566.474
CALM1	16052.6	-0.0906409	0.0850073	-1.06627	0.286301	0.47802	15548.6	16556.5	16520.5	15143.6	14981.9	17062	15588.2	17019.3
CALM2	15389.5	0.29949	0.112518	2.6617	0.00777465	0.0339725	16981.4	13797.6	19809.7	15417.5	15716.9	14509	13200.2	13683.7
CALM3	6991.38	-0.225196	0.0903009	-2.49384	0.0126369	0.0495626	6446.7	7536.07	5883.49	6684.67	6771.93	7216.95	7763.86	7627.39
CALML3-AS1	43.1183	-0.0828666	0.296575	-0.279412	0.779928	0.883596	41.8338	44.4027	36.0755	45.2254	44.2005	45.2924	42.3373	45.5783
CALML4	587.758	0.146956	0.104118	1.41144	0.158115	0.318823	617.629	557.888	617.528	622.719	612.64	563.393	549.377	560.893
CALML5	13.1211	-1.53576	0.596263	-2.57564	0.0100054	0.0412908	6.65954	19.5826	4.24418	9.56692	6.16751	16.5704	28.2249	13.9525
CALML6	34.8081	-0.288036	0.353645	-0.814477	0.415372	0.607534	31.3042	38.312	29.7093	31.3099	32.8934	37.5595	50.4016	26.9749
CALR	17961.6	0.301542	0.0875825	3.44295	0.000575414	0.0042027	19832.2	16091	18867.5	19650.5	20978.8	14987.4	16381.5	16904
CALR3	3.29805	-0.0157002	1.02457	-0.0153238	0.987774	NA	3.30132	3.29478	3.18313	2.60916	4.11168	2.20938	3.0241	4.65085
CALU	5046.95	0.0622138	0.0888092	0.700534	0.483594	0.665656	5155.84	4938.06	5522.74	5053.94	4890.84	5121.35	4678.28	5014.55
CAMK1	281.249	-0.283988	0.136596	-2.07904	0.037614	0.113075	253.687	308.812	238.735	247.87	274.454	304.895	315.514	306.026
CAMK1D	493.028	0.153572	0.128032	1.19948	0.23034	0.413451	519.112	466.945	478.531	556.621	522.183	479.436	416.317	505.082
CAMK2B	495.519	-0.167472	0.154586	-1.08336	0.27865	0.468675	466.686	524.353	381.976	494.871	523.211	470.599	604.819	497.641
CAMK2D	95.6344	0.179485	0.204407	0.878076	0.379903	0.575546	101.643	89.6263	105.043	99.1481	100.736	85.0613	91.7309	92.0868
CAMK2G	1480.51	-0.182261	0.0901649	-2.02141	0.043237	0.125249	1387.09	1573.93	1341.16	1421.12	1399	1502.38	1639.06	1580.36
CAMK2N1	879.052	0.163387	0.123356	1.32452	0.185332	0.356228	928.807	829.298	1029.21	884.505	872.703	912.476	730.823	844.594
CAMK2N2	150.912	-0.292122	0.176221	-1.6577	0.0973778	0.224756	135.672	166.152	123.081	140.025	143.909	152.448	180.438	165.57
CAMKK1	219.993	-0.341989	0.154178	-2.21815	0.0265449	0.0864828	194.163	245.824	192.049	181.771	208.668	231.985	270.153	235.333
CAMKK2	2497.32	0.102524	0.0977071	1.0493	0.29404	0.487065	2585.75	2408.9	2354.46	2717.87	2684.92	2346.37	2561.41	2318.91
CAMKMT	213.852	0.0950718	0.180449	0.526864	0.598288	0.756746	220.758	206.946	242.979	243.522	175.774	226.462	180.438	213.939
CAMKV	5.91667	-0.362594	0.797528	-0.454647	0.649363	0.795206	5.17935	6.65399	6.36627	6.08804	3.08376	6.62815	4.03213	9.3017
CAMLG	1446.06	0.242891	0.109	2.22837	0.0258562	0.0848443	1567.6	1324.51	1750.72	1537.66	1414.42	1364.29	1253.99	1355.26
CAMP	3.31328	1.19917	1.07191	1.11872	0.263261	NA	4.63019	1.99638	4.24418	3.47888	6.16751	1.10469	3.0241	1.86034
CAMSAP1	2011.85	-0.229764	0.101049	-2.27379	0.0229786	0.0776047	1851.6	2172.1	1693.43	2020.36	1841	2093.39	2299.32	2123.58
CAMSAP2	3402.64	-0.158968	0.0910997	-1.74499	0.0809872	0.197332	3214.78	3590.49	3125.84	3461.48	3057.03	3781.36	3502.91	3487.21
CAMSAP3	500.259	-1.01251	0.206168	-4.91112	9.06e-07	1.83e-05	331.312	669.205	221.758	388.765	383.414	594.324	823.562	589.728
CAMTA1	876.971	0.0657999	0.097868	0.672334	0.501371	0.679988	897.018	856.925	945.391	880.156	865.508	871.602	851.787	847.385
CAMTA2	1351.49	-0.36228	0.175012	-2.07003	0.0384496	0.114698	1182.57	1520.41	827.615	1253.27	1466.84	1389.7	1669.3	1502.22
CAND1	10258.7	0.203887	0.0802334	2.54117	0.0110482	0.0445865	10982.2	9535.21	11364.9	11061.1	10520.7	9965.43	9158.98	9481.22
CAND1.11	27.4582	0.972814	0.383523	2.53652	0.011196	0.0450072	36.3364	18.58	37.1366	40.0071	31.8655	22.0938	14.1124	19.5336
CAND2	23.8223	-0.657547	0.417138	-1.57633	0.11495	0.25361	18.4636	29.1811	19.0988	20.8733	15.4188	32.0361	20.1606	35.3465
CANT1	3329.51	-0.289187	0.100863	-2.86714	0.00414206	0.0204351	2996.74	3662.28	2672.77	3148.39	3169.07	3463.21	3858.75	3664.87
CANX	31402.2	0.105388	0.0756306	1.39345	0.163483	0.325979	32548.5	30255.8	33465.4	32618.8	31561.2	31364.4	29162.4	30240.8
CAP1	3529.54	-0.00635616	0.0778265	-0.0816709	0.934908	0.968479	3521.79	3537.29	3427.17	3518.89	3619.3	3536.12	3479.73	3596.04
CAP2	1459.17	-0.0273532	0.0984618	-0.277805	0.781162	0.884217	1445.02	1473.31	1467.42	1482	1385.63	1598.49	1375.96	1445.48
CAPG	117.846	0.275729	0.197544	1.39578	0.16278	0.32512	128.888	106.805	114.593	148.722	123.35	110.469	104.835	105.109
CAPN1	2634.11	-0.597666	0.167036	-3.57807	0.000346143	0.00277218	2095.96	3172.27	1524.72	2289.97	2473.17	2871.09	3692.42	2953.29
CAPN10	154.614	-1.0742	0.23745	-4.52389	6.07e-06	9.38e-05	99.4703	209.757	71.09	112.194	115.127	162.39	264.104	202.777
CAPN10-AS1	144.714	-0.331946	0.173701	-1.91102	0.0560014	0.151825	128.22	161.208	126.264	127.849	130.546	151.343	159.269	173.012
CAPN12	62.1875	-0.808484	0.289544	-2.79226	0.00523408	0.0246667	45.245	79.1299	37.1366	40.0071	58.5914	70.7003	98.7871	67.9024
CAPN13	5.91222	0.380033	0.806611	0.471147	0.637535	0.786894	6.68851	5.13593	9.5494	4.3486	6.16751	7.73284	3.0241	4.65085
CAPN14	5.80334	-0.277596	0.794174	-0.34954	0.726684	0.84841	5.26274	6.34394	4.24418	4.3486	7.19543	6.62815	4.03213	8.37153
CAPN15	484.448	-1.37974	0.388997	-3.54693	0.000389751	0.00304906	268.896	700	178.256	320.057	308.376	502.635	990.895	606.471
CAPN2	635.167	-0.0220042	0.106604	-0.20641	0.83647	0.91699	630.395	639.94	626.016	645.332	619.835	621.942	617.924	679.954
CAPN3	4.96861	1.35571	0.977949	1.38628	0.16566	NA	7.08804	2.84919	7.42731	8.6972	5.13959	5.52346	3.0241	0
CAPN5	131.145	-0.621991	0.209467	-2.9694	0.00298384	0.0158441	103.262	159.028	85.9446	108.715	115.127	135.877	190.518	150.688
CAPN7	3007.92	0.0645516	0.0961591	0.6713	0.502029	0.680464	3075.13	2940.71	3229.82	3047.5	2948.07	3155	2680.36	2986.78
CAPN8	102.69	0.707216	0.212837	3.3228	0.000891177	0.00599961	127.506	77.8735	120.959	121.761	139.797	72.9097	69.5542	91.1567
CAPN9	41.7244	-0.459877	0.303055	-1.51747	0.129149	0.275649	35.124	48.3247	37.1366	37.398	30.8376	44.1877	52.4177	48.3688
CAPNS1	7187.43	-0.125907	0.0807434	-1.55934	0.118915	0.259949	6874.27	7500.59	6693.07	6750.77	7178.99	7146.25	7722.53	7632.97
CAPRIN1	11916.2	0.105853	0.0755328	1.40141	0.161091	0.322827	12353	11479.4	12730.4	12461.3	11867.3	11756.1	11256.7	11425.3
CAPRIN2	509.535	0.19073	0.117926	1.61737	0.105798	0.238421	543.483	475.588	568.72	492.261	569.467	467.285	475.791	483.688
CAPS	55.7401	-0.799154	0.28342	-2.81968	0.00480718	0.023071	40.6146	70.8656	32.8924	47.8346	41.1168	58.5487	79.6345	74.4136
CAPS2	48.911	-0.303329	0.314689	-0.9639	0.335096	0.532401	43.8316	53.9904	58.3575	44.3557	28.7817	49.7111	56.4498	55.8102
CAPZA1	8225.18	0.267468	0.105241	2.54147	0.0110387	0.044571	8985.65	7464.71	10255	8356.27	8345.67	7810.17	7150.98	7432.99
CAPZA2	2712.82	0.312705	0.0987412	3.16692	0.00154064	0.00940174	3005.65	2419.98	3284.99	2869.21	2862.75	2592.71	2319.48	2347.75
CAPZB	4001.95	0.0737062	0.0826046	0.892278	0.372244	0.567879	4104.6	3899.3	4218.71	3943.31	4151.76	3818.92	3787.18	4091.82
CARD10	290.087	-0.923266	0.261805	-3.52654	0.000421022	0.00325919	200.162	380.011	117.776	233.955	248.756	294.953	512.08	333.001
CARD14	230.292	-0.903543	0.211303	-4.27605	1.9e-05	0.00024524	160.23	300.354	112.471	185.25	182.97	267.335	364.908	268.819
CARD6	1.82736	1.3861	1.64654	0.841826	0.399885	NA	2.64669	1.00803	1.06104	1.73944	5.13959	0	3.0241	0
CARD8	515.12	0.205814	0.12263	1.67834	0.0932815	0.218605	551.538	478.702	572.964	552.272	529.378	535.776	456.638	443.691
CARD8-AS1	26.3205	0.78049	0.421018	1.85382	0.0637655	0.16687	33.2468	19.3943	46.686	30.4402	22.6142	24.3032	17.1365	16.7431
CARD9	10.5643	-0.478273	0.633983	-0.754393	0.450613	0.637891	8.80123	12.3273	7.42731	8.6972	10.2792	13.2563	18.1446	5.58102
CARF	429.292	0.130909	0.139074	0.941286	0.346558	0.54382	448.338	410.245	442.456	491.392	411.168	469.494	378.012	383.23
[truncated: 15,189 more rows]

## Sheet: IFKM
Gene_ID	baseMean	log2FoldChange	lfcSE	stat	pvalue	padj	MT	WT	MT1	MT2	MT3	WT1	WT2	WT3
A1BG	77.5855	-0.92018	0.303259	-3.0343	0.00241092	0.0134218	53.5709	101.6	31.8313	60.0107	68.8706	81.7472	130.036	93.017
A1BG-AS1	139.797	-0.128469	0.197466	-0.650587	0.515313	0.692243	133.593	146.001	108.227	132.197	160.355	135.877	154.229	147.897
A2M	15.8212	0.768889	0.488571	1.57375	0.115545	0.254704	19.9813	11.661	18.0378	18.2641	23.6421	9.94223	11.0884	13.9525
A2M-AS1	20.8701	-0.631211	0.453838	-1.39083	0.164277	0.327007	16.3178	25.4224	18.0378	16.5247	14.3909	34.2455	26.2088	15.8129
A2ML1	4.03818	0.5252	0.990172	0.530413	0.595826	NA	4.7619	3.31446	4.24418	6.95776	3.08376	1.10469	6.04819	2.79051
A4GALT	70.1887	-1.21454	0.277732	-4.37307	1.23e-05	0.000169622	42.15	98.2275	36.0755	51.3135	39.0609	79.5378	123.988	91.1567
AAAS	1701.9	-0.0210296	0.1017	-0.206781	0.836181	0.916748	1689.67	1714.14	1563.98	1645.51	1859.51	1629.42	1779.18	1733.84
AACS	2062.73	-0.233904	0.115194	-2.03053	0.042303	0.123233	1895.68	2229.79	1608.54	2013.4	2065.09	2122.11	2337.63	2229.62
AACSP1	43.5041	-0.263303	0.299148	-0.880177	0.378764	0.574381	39.5563	47.4518	35.0145	37.398	46.2564	49.7111	43.3454	49.299
AADAT	398.212	0.0355302	0.126358	0.281186	0.778568	0.88247	403.396	393.028	439.273	373.11	397.805	388.852	380.028	410.205
AAED1	210.162	0.22333	0.150202	1.48686	0.137051	0.287992	226.278	194.047	231.308	229.606	217.919	207.682	187.494	186.964
AAGAB	3177.27	0.303573	0.0977839	3.10453	0.00190584	0.0111038	3510.55	2843.98	3879.18	3301.46	3351.02	2936.27	2706.57	2889.11
AAK1	811.303	0.269446	0.116006	2.3227	0.0201951	0.0705171	886.573	736.032	942.208	933.209	784.302	768.866	749.976	689.256
AAMDC	188.017	0.206136	0.18246	1.12976	0.258578	0.446626	201.537	174.497	227.064	213.081	164.467	152.448	179.43	191.615
AAMP	4319.8	-0.431135	0.120329	-3.58297	0.000339707	0.00273475	3678.96	4960.64	3075.97	3850.25	4110.65	4613.19	5306.28	4962.46
AANAT	16.6035	-0.685415	0.48033	-1.42697	0.153589	0.312432	12.7461	20.4609	11.6715	12.1761	14.3909	16.5704	26.2088	18.6034
AAR2	1034.89	-0.106534	0.122131	-0.872295	0.383047	0.578503	996.483	1073.29	841.409	1081.06	1066.98	1015.21	1121.94	1082.72
AARD	5.73809	1.02987	0.848791	1.21333	0.225002	0.406928	7.69682	3.77936	12.7325	5.21832	5.13959	5.52346	3.0241	2.79051
AARS	8286.8	0.0283082	0.077213	0.366624	0.713899	0.839232	8368.31	8205.3	8215.67	8292.78	8596.49	7865.41	8489.64	8260.84
AARS2	1016.73	-0.240765	0.134755	-1.78669	0.0739869	0.185547	931.85	1101.6	767.135	975.826	1052.59	1082.6	1204.6	1017.61
AASDH	408.016	0.00493267	0.127777	0.0386037	0.969206	0.984815	408.528	407.505	403.197	412.247	410.14	451.819	367.932	402.764
AASDHPPT	1075.49	-0.0163643	0.119602	-0.136823	0.891171	0.945409	1069.26	1081.72	1138.5	1005.4	1063.9	1242.78	995.936	1006.44
AASS	65.2384	-0.0237718	0.261616	-0.0908655	0.927599	0.963931	64.6821	65.7947	63.6627	57.4015	72.9822	70.7003	74.5944	52.0895
AATBC	20.5359	-0.619252	0.444102	-1.39439	0.163199	0.325538	16.1596	24.9122	18.0378	19.1338	11.3071	22.0938	31.249	21.3939
AATF	1558.11	0.205962	0.101704	2.02511	0.0428557	0.124376	1669.49	1446.73	1853.65	1564.63	1590.19	1436.1	1422.33	1481.76
AATK	85.879	-1.25212	0.394353	-3.17512	0.00149776	0.00919204	50.6622	121.096	23.343	66.9684	61.6751	78.4331	195.558	89.2963
AATK-AS1	10.3344	-1.2239	0.686354	-1.7832	0.0745543	0.186548	6.19623	14.4726	5.30522	6.08804	7.19543	8.83754	26.2088	8.37153
ABALON	21.6397	-0.102629	0.449012	-0.228565	0.819207	0.906201	20.8221	22.4572	12.7325	26.0916	23.6421	17.6751	29.2329	20.4637
ABAT	6010.86	-0.207348	0.0982597	-2.11021	0.0348405	0.10647	5579.24	6442.48	4916.88	6036.73	5784.1	6427.1	6404.03	6496.31
ABCA10	26.2182	-0.0677452	0.424272	-0.159674	0.873138	0.935729	25.521	26.9154	28.6482	30.4402	17.4746	28.722	35.2811	16.7431
ABCA11P	182.734	0.00954653	0.171677	0.0556074	0.955655	0.978282	183.448	182.019	185.683	187.859	176.802	152.448	206.647	186.964
ABCA12	5794.42	-0.0675532	0.0985481	-0.685484	0.493038	0.673004	5658.12	5930.73	5281.88	6295.9	5396.57	6259.19	5790.14	5742.87
ABCA17P	62.7868	-0.533147	0.255687	-2.08515	0.0370554	0.11172	51.3228	74.2508	48.8081	54.7924	50.368	62.9674	81.6506	78.1343
ABCA2	3370.43	-1.18387	0.364152	-3.25102	0.00114992	0.00739349	2060.12	4680.73	1187.31	2608.29	2384.77	4107.25	5934.28	4000.66
ABCA3	2613.03	-0.790623	0.174112	-4.54088	5.6e-06	8.8e-05	1914.09	3311.97	1336.92	2250.83	2154.52	3012.5	3819.43	3103.98
ABCA4	52.9742	-0.0610567	0.283158	-0.215628	0.829278	0.91242	51.7903	54.1581	45.6249	63.4895	46.2564	47.5018	55.4418	59.5309
ABCA5	1581.29	0.583921	0.0951515	6.13675	8.42e-10	3.3e-08	1896.72	1265.86	1951.26	1874.25	1864.64	1373.13	1209.64	1214.8
ABCA7	306.049	-0.880859	0.179845	-4.89788	9.69e-07	1.94e-05	215.163	396.935	181.439	246.131	217.919	356.816	488.895	345.093
ABCA9	5.66637	-0.716515	0.871015	-0.82262	0.410724	0.603328	4.30963	7.02311	6.36627	3.47888	3.08376	3.31408	13.1044	4.65085
ABCB10	639.4	0.199077	0.121067	1.64436	0.100103	0.229463	683.252	595.548	685.435	676.642	687.678	671.653	526.193	588.798
ABCB4	29.6359	-0.011632	0.401768	-0.028952	0.976903	0.987914	29.5162	29.7555	27.5872	32.1796	28.7817	33.1408	16.1285	39.9973
ABCB6	1707.88	-0.15818	0.103742	-1.52474	0.127324	0.273371	1614.53	1801.23	1499.26	1590.72	1753.63	1660.35	1907.2	1836.16
ABCB7	727.408	0.218324	0.111176	1.96377	0.0495562	0.138523	782.43	672.387	862.629	761.005	723.655	686.014	663.285	667.862
ABCB8	640.652	-0.67326	0.164694	-4.08795	4.35e-05	0.000493055	493.58	787.724	395.77	545.314	539.657	714.736	953.598	694.837
ABCB9	367.605	-0.777844	0.174486	-4.45792	8.28e-06	0.000122387	270.733	464.478	215.392	290.486	306.32	395.48	552.401	445.551
ABCC1	2111.05	-0.196536	0.126972	-1.54787	0.121653	0.264192	1967.31	2254.78	1636.13	2017.75	2248.06	2182.87	2449.52	2131.95
ABCC10	565.056	-0.570499	0.209006	-2.72958	0.00634157	0.0287884	454.56	675.553	290.726	520.962	551.992	606.476	804.409	615.773
ABCC11	72.6262	0.168965	0.257761	0.655511	0.512139	0.689291	76.7392	68.5131	57.2964	94.7995	78.1218	67.3862	66.5301	71.6231
ABCC2	433.224	-0.0771399	0.121497	-0.634911	0.525487	0.70031	421.614	444.834	442.456	434.86	387.525	449.61	425.389	459.504
ABCC3	694.475	-0.304984	0.136336	-2.237	0.0252864	0.0832915	621.165	767.785	503.996	652.29	707.208	750.086	793.321	759.949
ABCC4	240.534	-0.132868	0.146618	-0.906215	0.364822	0.561078	229.497	251.572	216.453	219.169	252.868	251.87	260.072	242.774
ABCC5	2429.03	0.00708413	0.0984561	0.0719522	0.94264	0.97227	2434.9	2423.16	2226.07	2578.72	2499.9	2259.1	2535.2	2475.18
ABCC6	84.1875	-0.17404	0.24808	-0.701546	0.482963	0.665199	79.1277	89.2474	68.9679	80.0142	88.401	72.9097	113.908	80.9248
ABCC6P1	12.0929	0.710374	0.637938	1.11355	0.265474	0.454591	15.0058	9.18009	8.48836	25.2219	11.3071	5.52346	8.06426	13.9525
ABCC6P2	21.477	-0.259805	0.426024	-0.609836	0.54197	0.713948	19.5928	23.3611	21.2209	13.9155	23.6421	26.5126	22.1767	21.3939
ABCC8	137.226	-0.273824	0.218163	-1.25513	0.20943	0.387202	124.088	150.363	96.5551	151.331	124.378	125.935	175.398	149.757
ABCC9	1310.49	0.101407	0.112999	0.897418	0.369496	0.565577	1356.53	1264.45	1463.18	1369.81	1236.59	1333.36	1127.99	1332
ABCD1	1995.97	1.16482	0.323026	3.60597	0.000310987	0.0025351	2760.61	1231.33	1743.3	3198.83	3339.71	1077.07	1485.84	1131.09
ABCD3	895.726	-0.0972177	0.108078	-0.899513	0.368379	0.564146	865.615	925.837	951.757	856.674	788.414	945.616	908.237	923.659
ABCD4	949.341	-0.169571	0.119174	-1.42289	0.154769	0.314131	893.401	1005.28	765.013	920.164	995.025	1035.1	980.815	999.933
ABCE1	4488.81	0.144778	0.089209	1.62291	0.104609	0.236562	4713.74	4263.88	4991.15	4591.25	4558.82	4563.48	4092.61	4135.54
ABCF1	3454.98	0.135429	0.0821231	1.6491	0.0991271	0.227863	3617.45	3292.51	3755.04	3489.32	3608	3161.63	3348.68	3367.22
ABCF2	2788.29	-0.0106515	0.110713	-0.096208	0.923355	0.961724	2777.91	2798.68	2396.9	2833.55	3103.29	2702.08	2907.16	2786.79
ABCF3	1766.98	-0.222508	0.10291	-2.16216	0.0306058	0.0965512	1631.05	1902.91	1510.93	1659.43	1722.79	1740.99	2042.27	1925.45
ABCG1	1487.12	-0.329038	0.128889	-2.55289	0.0106835	0.0434192	1318.07	1656.16	1088.63	1357.63	1507.96	1625	1776.15	1567.34
ABCG2	710.629	-0.165134	0.111402	-1.48232	0.138254	0.289548	670.027	751.231	721.51	686.209	602.36	739.039	750.984	763.67
ABHD1	43.3978	0.0890828	0.303835	0.293195	0.769373	0.876478	44.7442	42.0515	37.1366	42.6163	54.4797	40.8736	44.3534	40.9275
ABHD10	837.941	0.135099	0.11828	1.1422	0.253372	0.4407	877.129	798.753	979.344	886.245	765.8	822.996	775.177	798.086
ABHD11	1932.26	-0.380134	0.110184	-3.45	0.000560587	0.00413147	1679	2185.51	1466.36	1725.52	1845.11	2102.23	2320.49	2133.81
ABHD11-AS1	8.68405	-1.79375	0.764851	-2.34522	0.0190157	0.0673227	3.83945	13.5287	4.24418	5.21832	2.05584	19.8845	15.1205	5.58102
ABHD12	1602.51	-0.122666	0.115667	-1.06051	0.288912	0.481035	1534.21	1670.81	1363.44	1592.46	1646.73	1609.54	1858.81	1544.08
ABHD12B	2.0206	-1.08636	1.34446	-0.808029	0.419074	NA	1.27613	2.76506	1.06104	1.73944	1.02792	4.41877	2.01606	1.86034
ABHD13	409.351	0.077696	0.120913	0.642577	0.520498	0.696556	420.49	398.212	450.944	409.638	400.888	391.061	408.253	395.322
ABHD14A	50.0589	-0.17422	0.310437	-0.561208	0.574656	0.739326	46.8633	53.2544	38.1976	64.3593	38.033	51.9205	59.4739	48.3688
ABHD14B	1074.59	-0.253163	0.105001	-2.41105	0.0159067	0.0590501	980.426	1168.75	891.278	975.826	1074.18	1196.38	1159.24	1150.62
ABHD15	384.736	-0.00396263	0.123004	-0.0322155	0.9743	0.98689	384.247	385.226	400.014	393.983	358.744	371.177	390.108	394.392
ABHD16A	1136.76	0.040976	0.129186	0.317186	0.751103	0.865014	1152.95	1120.57	984.65	1147.16	1327.04	1030.68	1216.69	1114.34
ABHD16B	75.7455	-0.854256	0.2975	-2.87145	0.00408599	0.0202099	53.773	97.7179	36.0755	68.7079	56.5355	85.0613	129.028	79.0644
ABHD17A	130.68	-1.35927	0.322503	-4.21476	2.5e-05	0.000309232	73.1337	188.226	35.0145	93.9297	90.4569	139.191	258.056	167.431
ABHD17B	333.649	-0.0450823	0.124695	-0.361539	0.717696	0.842071	328.522	338.775	338.473	319.187	327.906	338.036	339.707	338.582
ABHD17C	1456.61	0.323645	0.109465	2.95661	0.00311045	0.0163763	1619.59	1293.62	1837.73	1486.35	1534.68	1317.9	1257.02	1305.96
ABHD2	2202.53	-0.348668	0.0878875	-3.96721	7.27e-05	0.000754463	1937.4	2467.67	1818.63	1994.27	1999.3	2459.04	2542.26	2401.7
ABHD3	277.83	-0.0110588	0.143792	-0.0769081	0.938697	0.970589	276.835	278.825	267.383	283.529	279.594	272.859	252.008	311.607
ABHD4	464.903	0.139441	0.122515	1.13815	0.255056	0.442464	487.14	442.667	440.334	500.959	520.127	454.028	452.606	421.367
ABHD5	711.256	0.200671	0.124634	1.61008	0.10738	0.241159	760.597	661.914	821.249	763.614	696.929	716.945	578.61	690.186
ABHD6	117.52	0.382665	0.215375	1.77674	0.0756115	0.188313	132.985	102.055	115.654	120.891	162.411	115.993	89.7148	100.458
ABHD8	57.8314	-1.20237	0.331923	-3.62245	0.000291824	0.00240414	35.0136	80.6493	26.5261	37.398	41.1168	56.3393	114.916	70.6929
ABI1	1644.87	0.171201	0.094031	1.82068	0.0686548	0.17587	1742.42	1547.32	1858.95	1668.12	1700.18	1623.9	1488.86	1529.2
ABI2	3479.86	0.145816	0.0784279	1.85923	0.0629946	0.165378	3655.46	3304.26	3687.13	3636.3	3642.94	3422.34	3199.49	3290.94
ABL1	1709.16	-0.24411	0.136861	-1.78363	0.0744842	0.186433	1564.66	1853.67	1258.4	1733.35	1702.23	1702.33	2051.34	1807.32
ABL2	1614.71	0.400882	0.10182	3.93718	8.24e-05	0.00083419	1837.24	1392.18	1689.18	2013.4	1809.14	1373.13	1455.6	1347.82
ABLIM1	1097.5	-0.291622	0.0977266	-2.98406	0.00284455	0.0152558	986.55	1208.45	925.231	1055.84	978.579	1229.52	1200.57	1195.27
ABLIM2	82.8321	-0.146256	0.277102	-0.527804	0.597635	0.756379	78.6065	87.0577	59.4185	86.972	89.4289	65.1768	116.932	79.0644
ABLIM3	433.621	-0.154779	0.114749	-1.34885	0.177387	0.344842	410.37	456.872	397.892	414.856	418.363	452.924	452.606	465.085
ABR	2722.33	-0.406165	0.137347	-2.95722	0.00310428	0.016366	2341.33	3103.34	1864.26	2607.42	2552.32	2876.62	3448.48	2984.92
ABRACL	964.064	0.288399	0.119875	2.40583	0.0161356	0.0596445	1060.52	867.608	1207.47	997.569	976.523	807.53	867.915	927.379
ABT1	651.001	-0.201367	0.106339	-1.89363	0.0582746	0.156403	605.694	696.307	582.514	604.455	630.114	666.129	729.815	692.977
ABTB1	167.097	-0.957056	0.19966	-4.79344	1.64e-06	3.07e-05	113.515	220.679	85.9446	114.803	139.797	223.148	238.904	199.987
ABTB2	913.03	-0.17783	0.118484	-1.50087	0.133389	0.282022	856.748	969.313	760.769	885.375	924.099	901.429	1061.46	945.053
ACAA1	1464.48	0.0107034	0.110764	0.0966324	0.923018	0.961724	1470.06	1458.9	1350.71	1455.91	1603.55	1327.84	1586.64	1462.23
ACAA2	2621.56	0.1893	0.112959	1.67582	0.0937737	0.219322	2793.62	2449.51	3239.37	2577.85	2563.63	2485.56	2348.71	2514.25
ACACA	3210.57	-0.0862905	0.0861846	-1.00123	0.316717	0.511792	3114.34	3306.81	2925.3	3297.98	3119.73	3225.7	3327.51	3367.22
ACACB	2843.03	-0.0997603	0.106229	-0.939104	0.347678	0.544971	2744.47	2941.6	2400.08	2956.18	2877.14	2831.33	3111.79	2881.67
ACAD10	1062.04	-0.241179	0.112875	-2.13668	0.032624	0.101332	973.205	1150.87	883.85	1042.79	992.97	1093.65	1265.08	1093.88
ACAD11	57.188	-0.549367	0.297102	-1.84909	0.0644453	0.16811	46.3456	68.0303	46.686	57.4015	34.9492	55.2346	84.6747	64.1817
ACAD8	799.618	-0.0168106	0.107479	-0.156409	0.875711	0.937086	795.102	804.135	740.609	785.357	859.34	771.075	801.385	839.943
ACAD9	2177.11	-0.167291	0.0937429	-1.78458	0.07433	0.18614	2051.08	2303.13	1988.4	2036.01	2128.82	2188.4	2497.9	2223.11
ACADM	900.001	0.217344	0.127715	1.70179	0.0887952	0.211023	967.746	832.255	1128.95	903.639	870.647	895.905	783.241	817.619
ACADS	158.368	-0.633059	0.234665	-2.69771	0.00698178	0.0311243	123.925	192.811	85.9446	152.201	133.629	176.751	238.904	162.78
ACADSB	760.614	-0.11483	0.121332	-0.946411	0.343939	0.541349	730.687	790.54	839.286	683.6	669.175	775.494	770.136	825.991
ACADVL	11207.8	-0.153558	0.0896305	-1.71324	0.0866688	0.207462	10611.9	11803.6	9867.72	10672.3	11295.8	11136.4	12389.7	11884.8
ACAP1	96.891	-0.676495	0.248847	-2.71852	0.00655755	0.0295872	74.4636	119.318	48.8081	80.0142	94.5685	124.83	115.924	117.201
ACAP2	2645.37	0.0555562	0.0902176	0.615803	0.538025	0.710575	2696.07	2594.68	2799.04	2760.49	2528.68	2730.8	2475.73	2577.5
ACAP3	646.789	-0.880997	0.181371	-4.85742	1.19e-06	2.33e-05	455	838.579	327.863	508.786	528.35	741.248	995.936	778.552
ACAT1	1633.22	0.265745	0.112813	2.35562	0.0184916	0.0660245	1783.48	1482.96	2045.69	1622.03	1682.7	1533.31	1426.37	1489.2
ACAT2	1449.47	0.333473	0.104355	3.19556	0.0013956	0.00870622	1616.62	1282.32	1798.47	1488.96	1562.44	1277.02	1250.97	1318.98
ACBD3	1487.74	0.312209	0.119227	2.61861	0.00882884	0.0375637	1648.12	1327.35	1809.08	1575.93	1559.35	1458.19	1148.15	1375.72
ACBD4	148.922	-0.189336	0.219565	-0.862322	0.38851	0.583603	139.096	158.747	97.6161	158.289	161.383	136.982	165.317	173.942
ACBD5	1481.35	-0.0904782	0.0899215	-1.00619	0.314324	0.509197	1434.87	1527.84	1451.51	1415.03	1438.06	1602.91	1449.55	1531.06
ACBD6	1639.21	-0.00532184	0.108654	-0.0489796	0.960936	0.980713	1636.57	1641.86	1853.65	1491.57	1564.49	1606.22	1704.58	1614.78
ACBD7	690.306	0.0752859	0.106177	0.70906	0.478287	0.661886	708.41	672.201	717.266	707.952	700.013	677.176	625.988	713.44
ACCS	323.566	-0.134386	0.158609	-0.84728	0.396839	0.590654	308.37	338.763	248.284	313.969	362.855	344.664	349.787	321.839
ACD	411.671	-0.596481	0.18199	-3.27754	0.00104715	0.00684041	327.569	495.773	241.918	363.543	377.246	444.086	584.658	458.574
ACE	32.8831	-0.527262	0.3656	-1.44218	0.149251	0.305609	26.7767	38.9894	20.1599	36.5282	23.6421	43.083	41.3293	32.5559
ACE2	8.84757	2.25709	0.742765	3.03876	0.00237551	0.0132962	14.62	3.07511	16.9767	10.4366	16.4467	4.41877	2.01606	2.79051
ACER2	125.585	-0.186254	0.22779	-0.817657	0.413553	0.605898	117.239	133.932	81.7005	148.722	121.294	135.877	131.044	134.875
ACER3	835.982	-0.0274742	0.11177	-0.245811	0.805829	0.898059	828.327	843.636	929.475	767.093	788.414	839.566	846.747	844.594
ACHE	47.583	-0.232982	0.322842	-0.721657	0.470505	0.655422	43.5595	51.6066	29.7093	60.8804	40.0888	53.0252	53.4257	48.3688
ACIN1	6277.28	0.0535088	0.0737839	0.725209	0.468324	0.653321	6393.84	6160.72	6414.02	6387.22	6380.29	5983.01	6280.04	6219.12
ACKR2	3.96396	-0.790542	0.970265	-0.814769	0.415204	NA	2.89491	5.033	2.12209	3.47888	3.08376	3.31408	8.06426	3.72068
ACKR3	3601.09	0.212002	0.114382	1.85345	0.0638185	0.16698	3865.12	3337.05	3296.67	3948.53	4350.15	3202.5	3514	3294.66
ACKR4	24.5183	0.238547	0.385551	0.618717	0.536103	0.709184	26.5865	22.4501	29.7093	24.3522	25.698	20.9891	22.1767	24.1844
ACLY	9150.09	-0.0627564	0.102208	-0.614008	0.53921	0.711433	8950.94	9349.24	7846.43	9232.95	9773.45	9058.48	9787.99	9201.24
ACMSD	9.97579	-0.327135	0.608478	-0.537629	0.590833	0.751666	8.86501	11.0866	8.48836	7.82748	10.2792	8.83754	15.1205	9.3017
ACO1	628.513	-0.429138	0.111055	-3.8642	0.000111455	0.00107849	535.561	721.464	496.569	565.318	544.797	713.631	694.534	756.228
ACO2	1470.38	-0.553463	0.164019	-3.37438	0.00073982	0.00517474	1191.42	1749.35	844.592	1364.59	1365.08	1695.7	1866.88	1685.47
ACOT1	159.512	-0.477517	0.23656	-2.01859	0.0435298	0.125838	133.315	185.709	89.1278	127.849	182.97	182.274	204.63	170.221
ACOT11	13.8796	0.0203101	0.54764	0.0370867	0.970416	0.985141	13.972	13.7872	18.0378	15.655	8.22335	11.0469	19.1526	11.162
ACOT13	770.81	0.143944	0.109266	1.31737	0.187716	0.358942	809.553	732.067	888.095	753.177	787.386	727.992	715.703	752.508
ACOT2	695.913	0.192655	0.111847	1.72249	0.0849801	0.204271	742.41	649.415	684.374	734.913	807.944	619.732	665.301	663.211
ACOT4	398.84	0.076611	0.126244	0.606851	0.54395	0.715473	409.717	387.963	441.395	376.589	411.168	384.433	372.972	406.484
ACOT6	12.9984	-0.321908	0.619639	-0.519509	0.603406	0.760933	11.584	14.4127	6.36627	7.82748	20.5584	16.5704	8.06426	18.6034
ACOT7	627.553	-0.36793	0.151581	-2.42729	0.0152121	0.0569757	547.841	707.265	445.639	557.49	640.393	673.862	802.393	645.538
ACOT8	210.344	-0.481514	0.164546	-2.92632	0.00343003	0.017681	175.414	245.275	150.668	184.381	191.193	239.718	269.145	226.961
ACOT9	557.853	0.221468	0.12445	1.77958	0.0751446	0.187541	600.788	514.918	683.313	567.057	551.992	520.31	497.968	526.476
ACOX1	1232.39	-0.164429	0.0985112	-1.66914	0.0950902	0.221364	1162.34	1302.45	1132.13	1153.25	1201.64	1316.79	1204.6	1385.95
ACOX2	108.106	-0.226352	0.19489	-1.16143	0.245465	0.431713	99.6325	116.58	101.86	103.497	93.5406	111.574	120.964	117.201
ACOX3	347.123	-0.268479	0.126015	-2.13052	0.0331283	0.10257	314.743	379.503	316.191	327.884	300.152	386.642	389.1	362.766
ACOXL	15.2499	0.297549	0.494925	0.601201	0.547706	0.718716	16.8228	13.6771	15.9157	19.1338	15.4188	9.94223	17.1365	13.9525
ACP1	3621.78	0.000226843	0.082083	0.00276358	0.997795	0.998884	3622.42	3621.14	3786.87	3525.84	3554.54	3561.53	3541.22	3760.68
ACP2	876.177	0.3428	0.112257	3.05371	0.0022603	0.0127664	980.127	772.227	981.466	934.079	1024.84	691.537	844.731	780.413
ACP5	42.8553	0.596735	0.310293	1.92314	0.0544628	0.148562	51.5534	34.1573	45.6249	50.4438	58.5914	34.2455	40.3213	27.9051
ACP6	573.38	-0.163059	0.107861	-1.51175	0.130597	0.278051	541.012	605.747	551.743	524.441	546.853	634.093	589.699	593.448
ACPP	93.3232	-0.13055	0.217651	-0.599811	0.548632	0.71932	88.9704	97.676	82.7615	89.5811	94.5685	113.783	92.7389	86.5058
ACPT	6.29046	-2.20835	0.87121	-2.5348	0.011251	0.0451725	2.19859	10.3823	1.06104	3.47888	2.05584	7.73284	14.1124	9.3017
ACRBP	16.9878	0.341922	0.480201	0.71204	0.47644	0.660917	18.9424	15.0333	16.9767	18.2641	21.5863	20.9891	11.0884	13.0224
ACRC	49.6717	0.184987	0.312193	0.592542	0.553488	0.723243	52.8678	46.4756	60.4796	42.6163	55.5076	59.6534	33.2651	46.5085
ACRV1	13.1521	0.434419	0.623272	0.696998	0.485804	0.667549	15.154	11.1501	20.1599	7.82748	17.4746	15.4657	4.03213	13.9525
ACSBG1	6.36927	-0.0424634	0.814832	-0.0521131	0.958439	0.979194	6.20039	6.53815	3.18313	11.3064	4.11168	8.83754	7.05622	3.72068
ACSBG2	22.8606	0.310086	0.440244	0.704349	0.481215	0.664055	25.3766	20.3445	35.0145	22.6127	18.5025	14.361	26.2088	20.4637
ACSF2	1065.02	-0.00031727	0.103271	-0.0030722	0.997549	0.998836	1065.07	1064.97	994.199	1061.06	1139.96	998.642	1085.65	1110.62
ACSF3	558.381	-0.389406	0.172015	-2.26379	0.0235869	0.0791721	483.302	633.46	362.877	534.008	553.02	563.393	738.887	598.099
ACSL1	1032.92	1.3315	0.0982919	13.5464	8.32e-42	1.06e-39	1478.25	587.585	1411.19	1495.05	1528.52	608.685	562.482	591.588
ACSL3	3351.31	0.136718	0.0812836	1.68198	0.0925719	0.217303	3509.64	3192.99	3503.57	3545.85	3479.51	3350.53	3167.24	3061.19
ACSL4	83.6807	0.321924	0.246895	1.30389	0.192271	0.365313	92.841	74.5203	97.6161	101.757	79.1498	91.6894	57.4578	74.4136
ACSL5	7.27049	0.362244	0.747884	0.484359	0.628131	0.780508	8.19077	6.3502	9.5494	7.82748	7.19543	7.73284	2.01606	9.3017
ACSL6	7.95913	-0.596187	0.716947	-0.831564	0.405655	0.598852	6.35691	9.56135	10.6104	4.3486	4.11168	13.2563	7.05622	8.37153
ACSM1	10.3726	0.97158	0.638322	1.52208	0.127988	0.273971	13.7741	6.97121	11.6715	12.1761	17.4746	3.31408	11.0884	6.51119
ACSM3	12.9605	0.472787	0.529995	0.892061	0.37236	0.568	15.0416	10.8794	16.9767	14.7852	13.3629	13.2563	10.0803	9.3017
ACSS1	878.778	-0.283932	0.0995288	-2.85276	0.00433415	0.0211854	792.557	964.998	754.403	784.487	838.782	959.977	990.895	944.123
ACSS2	1611.94	0.555221	0.0843709	6.58071	4.68e-11	2.16e-09	1918.35	1305.52	1902.45	1893.38	1959.21	1305.75	1322.54	1288.29
ACSS3	866.606	0.00810663	0.10357	0.0782718	0.937612	0.970041	868.923	864.289	892.339	899.29	815.14	843.985	917.309	831.572
ACTA2	20.2661	-0.217044	0.443628	-0.489248	0.624666	0.778151	18.7094	21.8228	14.8546	21.743	19.5305	24.3032	15.1205	26.0448
ACTB	70090.6	-0.230446	0.0822726	-2.80101	0.00509434	0.0241433	64504.7	75676.6	62312	63622.6	67579.5	72822.4	80430.9	73776.4
ACTG1	64490.1	-0.0786301	0.0865289	-0.908714	0.363501	0.560019	62733.3	66247	61838.8	61127.4	65233.8	63222.6	71904.9	63613.4
ACTG1P17	13.6908	0.229436	0.55392	0.414204	0.678725	0.81669	14.8486	12.533	21.2209	13.0458	10.2792	8.83754	11.0884	17.6732
ACTG1P20	65.1926	0.0762781	0.258949	0.294568	0.768324	0.876141	66.8854	63.4998	75.3342	73.9262	51.3959	62.9674	61.4899	66.0421
ACTG2	17.3504	-0.505306	0.463323	-1.09061	0.275443	0.465276	14.376	20.3248	13.7936	13.9155	15.4188	15.4657	23.1847	22.3241
ACTL10	38.9924	0.00568001	0.310984	0.0182646	0.985428	0.991799	39.08	38.9048	42.4418	40.8768	33.9213	37.5595	37.2972	41.8576
ACTL6A	3105.48	0.155025	0.0938865	1.6512	0.0986976	0.227013	3272.46	2938.5	3566.17	3150.99	3100.2	2957.26	2806.36	3051.89
ACTN1	3905.84	-0.204833	0.140545	-1.45742	0.145	0.299433	3628.81	4182.87	2773.57	3907.65	4205.22	4057.53	4305.3	4185.76
ACTN4	6850.53	-0.458229	0.160102	-2.8621	0.00420842	0.0207164	5771.41	7929.65	4256.91	6472.46	6584.85	7104.27	9154.95	7529.73
ACTR10	1919.34	0.224265	0.112652	1.99078	0.046505	0.132122	2068.38	1770.31	2371.44	1912.51	1921.18	1871.35	1695.51	1744.07
ACTR1A	2783.03	-0.050511	0.0872202	-0.579121	0.562508	0.730296	2734.65	2831.41	2661.1	2677	2865.84	2676.67	2869.87	2947.71
ACTR1B	1688.31	-0.487149	0.142582	-3.41662	0.000634029	0.00455802	1405.71	1970.92	1108.79	1515.05	1593.27	1853.67	2201.54	1857.55
ACTR2	8372.68	0.0219631	0.0878731	0.249941	0.802633	0.896019	8436.52	8308.84	9002.97	8314.52	7992.07	8564.68	7817.29	8544.54
ACTR3	4198.52	0.342796	0.106294	3.22497	0.00125988	0.00799779	4695.25	3701.8	5389.05	4337.29	4359.4	3769.21	3660.16	3676.03
ACTR3B	380.614	-0.291841	0.129561	-2.25254	0.024288	0.0808436	342.538	418.691	380.915	315.708	330.99	406.527	425.389	424.158
ACTR3C	68.0644	0.34864	0.254883	1.36785	0.17136	0.336165	76.1894	59.9394	75.3342	73.0565	80.1777	72.9097	47.3775	59.5309
ACTR5	394.217	-0.00965354	0.123785	-0.0779862	0.937839	0.970041	392.875	395.559	375.61	400.071	402.944	402.108	366.924	417.646
ACTR6	1306.55	0.2832	0.122898	2.30434	0.0212033	0.073235	1434.47	1178.62	1595.81	1344.59	1363.02	1288.07	1018.11	1229.68
ACTR8	786.016	0.0419259	0.104708	0.400408	0.688856	0.823198	797.328	774.704	779.868	840.149	771.967	776.599	730.823	816.689
ACTRT3	33.2583	-0.334188	0.356183	-0.938247	0.348117	0.54544	29.4466	37.07	36.0755	23.4824	28.7817	46.3971	32.257	32.5559
ACVR1	481.567	0.206715	0.125355	1.64904	0.0991404	0.227863	516.273	446.861	547.499	473.997	527.322	456.238	406.237	478.107
ACVR1B	1602.11	0.0980387	0.0977532	1.00292	0.315899	0.510978	1656.12	1548.1	1506.68	1770.75	1690.93	1584.13	1528.18	1531.99
ACVR1C	19.6097	0.572122	0.472853	1.20993	0.226304	0.408664	23.3396	15.8798	19.0988	25.2219	25.698	24.3032	13.1044	10.2319
ACVR2A	170.103	0.485731	0.181777	2.67213	0.00753711	0.033168	198.652	141.554	233.43	182.641	179.886	140.296	129.028	155.338
ACVR2B	1262.75	-0.114669	0.102025	-1.12393	0.261041	0.449331	1212.16	1313.33	1160.78	1325.45	1150.24	1305.75	1372.94	1261.31
ACVR2B-AS1	88.6037	-0.174633	0.21808	-0.800776	0.423262	0.614713	83.4009	93.8065	87.0057	74.7959	88.401	83.9566	99.7952	97.6678
ACVRL1	2.76049	1.19251	1.16147	1.02672	0.30455	NA	3.8284	1.69259	3.18313	5.21832	3.08376	2.20938	1.00803	1.86034
ACYP1	305.874	0.276451	0.147259	1.87731	0.0604761	0.160398	335.38	276.368	381.976	298.314	325.85	258.498	294.345	276.26
ACYP2	52.8446	-0.00418676	0.295784	-0.0141548	0.988706	0.993235	52.8568	52.8325	59.4185	42.6163	56.5355	59.6534	39.3132	59.5309
ADA	147.551	-0.278992	0.186568	-1.49539	0.134812	0.284219	133.358	161.743	113.532	131.328	155.216	159.076	152.213	173.942
ADAL	398.279	0.100973	0.131519	0.767749	0.442636	0.631781	412.457	384.101	461.554	368.761	407.056	391.061	378.012	383.23
ADAM10	1383.22	-0.000557763	0.103981	-0.0053641	0.99572	0.997455	1382.9	1383.55	1507.74	1388.94	1252.01	1444.94	1334.63	1371.07
ADAM11	141.68	-0.708054	0.222256	-3.18576	0.00144374	0.00892048	107.6	175.761	84.8836	99.1481	138.769	169.018	206.647	151.618
ADAM12	5.80436	0.343672	0.883923	0.388803	0.697422	0.82916	6.46653	5.1422	8.48836	7.82748	3.08376	8.83754	1.00803	5.58102
ADAM15	3998.85	-0.714117	0.164524	-4.34052	1.42e-05	0.000192857	3028.64	4969.05	2157.1	3291.02	3637.8	4685	5509.9	4712.24
ADAM17	1621.93	0.201254	0.0835385	2.40912	0.015991	0.0592779	1734.81	1509.05	1756.03	1742.05	1706.35	1521.16	1513.06	1492.92
ADAM1A	398.643	0.203657	0.122229	1.6662	0.0956745	0.2221	426.882	370.403	424.418	407.029	449.201	373.386	351.803	386.021
ADAM2	2.45222	-0.631854	1.19208	-0.530042	0.596083	NA	1.91972	2.98472	2.12209	2.60916	1.02792	2.20938	3.0241	3.72068
ADAM20P1	18.6229	-0.280398	0.495913	-0.565418	0.57179	0.737201	16.7215	20.5244	13.7936	26.0916	10.2792	23.1985	15.1205	23.2542
ADAM22	340.146	-0.0141746	0.133635	-0.10607	0.915527	0.957842	338.36	341.932	354.389	357.455	303.236	352.397	324.586	348.814
ADAM32	44.7054	0.100466	0.301803	0.332888	0.739219	0.857057	46.2031	43.2077	45.6249	42.6163	50.368	53.0252	40.3213	36.2766
ADAM8	188.118	-1.06084	0.204831	-5.1791	2.23e-07	5.5e-06	121.938	254.298	117.776	122.63	125.406	204.368	330.634	227.892
ADAM9	1807.74	0.1544	0.0939405	1.64359	0.100261	0.229724	1904.39	1711.09	2009.62	1870.77	1832.78	1799.54	1601.76	1731.98
ADAMTS10	2.95058	0.272708	1.11019	0.24564	0.805961	NA	3.22651	2.67466	1.06104	3.47888	5.13959	2.20938	3.0241	2.79051
ADAMTS13	224.301	-0.720288	0.218518	-3.29624	0.000979866	0.00646071	169.149	279.453	113.532	207.863	186.053	264.021	330.634	243.705
ADAMTS14	3.82786	0.0498145	1.01822	0.0489229	0.960981	NA	3.87009	3.78562	2.12209	4.3486	5.13959	6.62815	1.00803	3.72068
ADAMTS15	22.2446	-0.36403	0.412896	-0.88165	0.377966	0.573339	19.4874	25.0018	21.2209	15.655	21.5863	28.722	21.1687	25.1146
ADAMTS17	50.491	-0.20206	0.331438	-0.609646	0.542096	0.713948	46.8169	54.165	28.6482	52.1832	59.6193	66.2815	53.4257	42.7878
ADAMTS19	2320.8	-0.055737	0.083735	-0.665636	0.505644	0.683811	2275.96	2365.64	2374.62	2281.28	2171.99	2389.45	2358.79	2348.68
ADAMTS19-AS1	102.072	-0.458359	0.243607	-1.88155	0.0598969	0.159243	85.8765	118.268	61.5406	97.4086	98.6802	103.841	142.132	108.83
ADAMTS20	54.2323	0.0993517	0.32698	0.303847	0.761245	0.871848	55.8686	52.5959	42.4418	74.7959	50.368	62.9674	59.4739	35.3465
ADAMTS6	20.5043	-0.399698	0.430793	-0.927819	0.353502	0.550542	17.6798	23.3289	22.2819	17.3944	13.3629	25.4079	23.1847	21.3939
ADAMTS7	11.6934	-1.02184	0.599929	-1.70327	0.0885183	0.210558	7.68746	15.6994	4.24418	9.56692	9.25127	11.0469	21.1687	14.8827
ADAMTS9	486.617	0.240966	0.114755	2.09983	0.035744	0.108504	526.938	446.296	498.691	560.969	521.155	451.819	441.518	445.551
ADAMTS9-AS1	4.17927	0.181865	0.973708	0.186775	0.851837	NA	4.44991	3.90862	2.12209	6.08804	5.13959	1.10469	5.04016	5.58102
ADAMTSL3	61.6734	1.2204	0.296271	4.11922	3.8e-05	0.000437074	86.2881	37.0588	73.2121	86.972	98.6802	30.9314	51.4096	28.8353
ADAMTSL4	67.7328	-0.410369	0.291897	-1.40587	0.159763	0.321205	58.1066	77.359	37.1366	65.229	71.9543	64.0721	91.7309	76.2739
ADAMTSL4-AS1	35.913	0.617227	0.433559	1.42363	0.154554	0.313819	43.5165	28.3096	71.09	23.4824	35.9772	37.5595	23.1847	24.1844
ADAMTSL5	208.443	-0.524329	0.156356	-3.35342	0.000798202	0.00549206	170.883	246.002	155.974	169.595	187.081	262.917	237.896	237.193
ADAP1	354.143	-0.605584	0.17644	-3.43224	0.000598626	0.00434528	280.682	427.605	209.026	317.448	315.571	383.328	481.839	417.646
ADAP2	90.2331	0.120867	0.218543	0.553057	0.580224	0.743962	94.1039	86.3624	92.3109	91.3206	98.6802	83.9566	75.6024	99.5282
ADAR	31211.9	1.36739	0.0872972	15.6636	2.68e-55	4.01e-53	44987	17436.8	40878.9	47498	46584.3	17243.1	17399.6	17667.6
ADARB1	948.659	-0.527775	0.105092	-5.02203	5.11e-07	1.13e-05	776.816	1120.5	731.06	814.058	785.33	1080.39	1208.63	1072.49
ADARB2	2.52793	-1.07061	1.20679	-0.887155	0.374996	NA	1.61877	3.43708	1.06104	1.73944	2.05584	4.41877	4.03213	1.86034
ADAT1	1256.78	0.0523077	0.111452	0.469328	0.638835	0.787997	1279.35	1234.22	1105.61	1355.02	1377.41	1220.68	1231.81	1250.15
ADAT2	459.028	0.383165	0.126445	3.03029	0.00244317	0.013548	519.686	398.37	566.598	522.702	469.759	405.422	372.972	416.716
ADAT3	16.6763	-2.15248	0.578588	-3.72023	0.00019904	0.00174932	6.06868	27.284	3.18313	7.82748	7.19543	20.9891	41.3293	19.5336
ADCK1	365.532	-0.240424	0.133767	-1.79734	0.0722817	0.182366	335.142	395.921	303.459	333.972	367.995	402.108	368.94	416.716
ADCK2	739.821	-0.227127	0.109718	-2.0701	0.0384425	0.114698	681.441	798.201	615.406	711.431	717.487	803.111	818.522	772.971
ADCK3	515.501	-0.342809	0.128062	-2.67689	0.00743084	0.0327561	454.578	576.423	426.54	459.212	477.982	519.205	649.173	560.893
ADCK4	481.332	-0.797363	0.169231	-4.71169	2.46e-06	4.42e-05	351.417	611.247	264.2	369.631	420.419	592.115	684.454	557.172
ADCK5	113.008	-1.17448	0.266108	-4.41352	1.02e-05	0.000146159	69.2161	156.8	43.5028	80.8839	83.2614	143.61	196.566	130.224
ADCY1	1888.14	-0.537621	0.133513	-4.02673	5.66e-05	0.000614311	1539.98	2236.29	1255.22	1727.26	1637.47	2091.18	2484.8	2132.88
ADCY10P1	20.6353	0.274033	0.493316	0.555492	0.578558	0.742552	22.4834	18.7872	25.4651	23.4824	18.5025	30.9314	16.1285	9.3017
ADCY3	1290.33	-0.473543	0.170786	-2.77272	0.00555896	0.0258325	1080.21	1500.44	783.051	1227.17	1230.42	1322.32	1741.88	1437.11
ADCY4	5.40616	0.0360893	0.834504	0.0432464	0.965505	0.982934	5.46926	5.34306	6.36627	6.95776	3.08376	3.31408	8.06426	4.65085
ADCY5	50.2988	-0.340869	0.274686	-1.24094	0.214628	0.39395	44.3844	56.2132	45.6249	44.3557	43.1726	54.1299	61.4899	53.0197
ADCY6	4568.33	0.0185315	0.0992674	0.186683	0.851909	0.92588	4597.59	4539.07	4123.22	4707.79	4961.76	4323.76	4794.2	4499.23
ADCY7	225.175	0.204421	0.162512	1.25788	0.208435	0.385869	241.031	209.32	207.965	270.483	244.645	190.007	214.711	223.241
ADCY9	1039.27	-0.315369	0.1488	-2.11942	0.0340548	0.104678	925.838	1152.71	708.778	1048.01	1020.72	1085.91	1243.91	1128.3
ADD1	3557.51	-0.0535005	0.0955374	-0.559995	0.575483	0.739961	3491.43	3623.58	3141.75	3569.33	3763.21	3538.33	3707.54	3624.87
ADD3	547.061	-0.150463	0.117886	-1.27634	0.201834	0.377203	518.613	575.508	549.621	526.181	480.038	581.068	535.265	610.192
ADGRA2	30.3978	-0.173822	0.380625	-0.456675	0.647905	0.794198	28.4679	32.3278	18.0378	36.5282	30.8376	35.3501	27.2169	34.4163
ADGRA3	1071.75	-0.400541	0.112271	-3.56763	0.000360222	0.00286718	923.535	1219.96	844.592	1035.84	890.178	1214.06	1161.25	1284.56
ADGRB1	51.8409	-0.638867	0.321592	-1.98658	0.0469694	0.132942	40.6259	63.0559	33.9534	36.5282	51.3959	44.1877	82.6586	62.3214
ADGRB2	113.7	-0.558211	0.224828	-2.48284	0.013034	0.0507145	91.9197	135.48	77.4563	96.5389	101.764	117.097	169.349	119.992
ADGRD1	24.5688	0.703989	0.419169	1.67949	0.0930573	0.218113	30.4668	18.6707	20.1599	32.1796	39.0609	15.4657	19.1526	21.3939
ADGRE2	18.4846	-0.11937	0.495691	-0.240816	0.809698	0.899795	17.6525	19.3168	9.5494	26.9613	16.4467	15.4657	20.1606	22.3241
ADGRE4P	3.48677	0.992866	1.11036	0.894186	0.371222	NA	4.66084	2.3127	2.12209	2.60916	9.25127	2.20938	1.00803	3.72068
ADGRE5	251.715	-0.51376	0.168992	-3.04015	0.0023646	0.0132584	207.286	296.144	166.584	209.602	245.673	286.115	319.546	282.772
ADGRF3	13.7039	-0.146415	0.518007	-0.28265	0.777445	0.881905	13.014	14.3939	9.5494	13.0458	16.4467	13.2563	14.1124	15.8129
ADGRF4	82.4791	1.25835	0.254251	4.94924	7.45e-07	1.55e-05	116.434	48.5242	95.494	130.458	123.35	38.6642	47.3775	59.5309
ADGRG1	1729.82	-0.607522	0.145061	-4.18805	2.81e-05	0.00034118	1370.75	2088.9	1098.18	1422.86	1591.22	1924.37	2388.03	1954.29
ADGRG2	232.199	-0.0377616	0.156537	-0.24123	0.809377	0.899687	229.015	235.383	200.537	235.694	250.812	236.404	253.016	216.73
ADGRG6	2628.76	-0.0441219	0.0999474	-0.441452	0.658886	0.802822	2587.97	2669.56	2375.68	2820.5	2567.74	2847.9	2567.46	2593.31
ADGRL1	2465.66	-0.479057	0.151378	-3.16464	0.00155277	0.00943268	2059.87	2871.45	1698.73	2203	2277.87	2481.14	3499.89	2633.31
ADGRL2	91.4881	-0.687159	0.235491	-2.91798	0.00352306	0.0180884	69.9863	112.99	66.8458	72.1867	70.9264	120.411	132.052	86.5058
ADGRL3	4.36681	-0.332796	0.982061	-0.338875	0.734704	NA	3.81736	4.91627	2.12209	5.21832	4.11168	9.94223	2.01606	2.79051
ADGRV1	324.136	-0.00198113	0.154422	-0.0128294	0.989764	0.993798	323.451	324.821	284.36	376.589	309.404	360.13	318.538	295.794
ADH5	3252.24	0.151143	0.0904009	1.67191	0.0945412	0.220426	3422.75	3081.72	3651.06	3257.97	3359.24	3130.7	2908.17	3206.3
ADH6	3.85651	-0.132083	0.986166	-0.133936	0.893453	NA	3.70774	4.00528	4.24418	1.73944	5.13959	4.41877	2.01606	5.58102
ADHFE1	19.1341	-0.682842	0.512961	-1.33118	0.183131	0.353266	14.6369	23.6313	8.48836	20.0036	15.4188	24.3032	13.1044	33.4861
ADI1	3260.32	-0.167502	0.0873025	-1.91863	0.0550307	0.149795	3071.61	3449.03	3283.93	2871.81	3059.09	3487.51	3450.49	3409.07
ADIPOR1	5399.55	-0.00915591	0.087363	-0.104803	0.916532	0.958075	5382.35	5416.75	4983.73	5447.06	5716.26	5419.62	5258.9	5571.72
ADIPOR2	10928.9	0.264268	0.0725013	3.645	0.000267389	0.00223126	11926.9	9930.79	11904.9	12040.4	11835.5	10105.7	9628.72	10057.9
ADIRF	668.075	-0.47807	0.144355	-3.31176	0.000927124	0.00618388	558.257	777.893	481.714	600.976	592.081	678.281	911.261	744.136
ADK	1581.99	0.0439648	0.0992753	0.442858	0.657869	0.802293	1606.39	1557.59	1764.52	1510.7	1543.93	1581.92	1503.98	1586.87
ADM	256.71	0.298714	0.155595	1.91981	0.0548813	0.149519	283.183	230.236	269.505	280.92	299.124	213.206	269.145	208.358
ADM2	179.643	-0.150118	0.214023	-0.701412	0.483046	0.665199	170.081	189.205	122.02	193.948	194.277	187.798	220.759	159.059
ADM5	150.027	-0.72207	0.189926	-3.80185	0.000143619	0.00132923	113.073	186.98	89.1278	122.63	127.462	187.798	194.55	178.593
ADNP	7572	0.0852154	0.0751619	1.13376	0.256896	0.444662	7795.26	7348.74	7619.36	7961.42	7804.99	7575.98	7160.05	7310.21
ADNP-AS1	89.0454	0.225101	0.242931	0.926605	0.354132	0.551413	95.8372	82.2535	101.86	98.2783	87.3731	106.05	63.506	77.2041
ADNP2	844.031	-0.0210454	0.107553	-0.195674	0.844865	0.921385	837.776	850.286	824.432	830.582	858.312	843.985	927.389	779.482
ADO	887.607	0.0652361	0.113819	0.573158	0.566537	0.733506	907.537	867.676	996.321	913.206	813.084	915.79	865.899	821.34
ADORA1	185.277	-0.585946	0.195231	-3.00129	0.00268837	0.014651	148.16	222.394	112.471	146.983	185.025	216.52	210.679	239.984
ADORA2A-AS1	10.0945	-0.182273	0.626119	-0.291115	0.770963	0.877475	9.46443	10.7246	5.30522	8.6972	14.3909	8.83754	13.1044	10.2319
ADORA2B	277.385	0.197741	0.15411	1.28311	0.199453	0.374919	296.521	258.249	327.863	257.437	304.264	280.592	231.847	262.308
ADPGK	1639.43	0.239866	0.0902378	2.65815	0.00785703	0.0342073	1775.73	1503.13	1762.4	1689.87	1874.92	1463.72	1509.02	1536.64
ADPGK-AS1	5.78149	0.685531	0.866404	0.791236	0.428806	0.619538	7.09908	4.46391	8.48836	8.6972	4.11168	7.73284	1.00803	4.65085
ADPRH	83.7602	0.854367	0.236519	3.61226	0.000303542	0.00248616	108.052	59.4681	115.654	91.3206	117.183	54.1299	55.4418	68.8326
ADPRHL1	245.166	-0.283005	0.169747	-1.66722	0.0954715	0.221763	221.229	269.103	199.476	222.648	241.561	230.881	321.562	254.867
ADPRHL2	915.454	0.737714	0.128432	5.74402	9.25e-09	3.11e-07	1144.7	686.205	1010.11	1123.68	1300.32	617.523	749.976	691.116
ADPRM	131.435	0.354101	0.187399	1.88956	0.058817	0.157182	147.688	115.183	150.668	133.067	159.327	107.155	111.892	126.503
ADRA2A	34.6726	0.147307	0.335406	0.439191	0.660523	0.803825	36.4156	32.9296	37.1366	33.0494	39.0609	36.4548	36.2891	26.0448
ADRA2B	35.8899	-0.433121	0.330266	-1.31143	0.189712	0.361548	30.5355	41.2443	31.8313	33.0494	26.7259	35.3501	48.3855	39.9973
ADRA2C	232.511	-1.03209	0.184778	-5.5856	2.33e-08	7.29e-07	152.613	312.41	132.631	161.768	163.439	273.964	386.076	277.191
ADRB1	70.832	0.373727	0.254262	1.46985	0.141603	0.294574	79.8825	61.7814	93.3719	77.4051	68.8706	74.0144	56.4498	54.88
ADRBK1	1908.17	-0.66163	0.16227	-4.07733	4.56e-05	0.000513476	1477.92	2338.41	1101.36	1605.5	1726.9	2111.07	2713.62	2190.55
ADRBK2	213.409	-0.052978	0.147405	-0.359404	0.719293	0.843086	209.571	217.246	216.453	208.733	203.528	210.996	214.711	226.031
ADRM1	1613.98	-0.68846	0.169769	-4.05526	5.01e-05	0.000553604	1235.82	1992.14	962.368	1375.9	1369.19	1694.6	2483.79	1798.02
ADSL	1587.44	-0.0502157	0.102689	-0.489006	0.624837	0.778151	1560.24	1614.65	1714.65	1443.73	1522.35	1612.85	1537.25	1693.84
ADSS	1311.59	0.312904	0.116616	2.68321	0.00729199	0.0322447	1453.4	1169.78	1674.33	1379.38	1306.48	1214.06	1126.98	1168.29
ADSSL1	291.961	-0.294868	0.156431	-1.88497	0.0594337	0.158364	262.23	321.691	236.613	270.483	279.594	279.487	373.98	311.607
AEBP1	70.7154	-0.0946749	0.257697	-0.367388	0.71333	0.838757	68.5751	72.8557	80.6394	58.2712	66.8147	58.5487	84.6747	75.3438
AEBP2	1072.6	0.127692	0.119068	1.07242	0.28353	0.474619	1120.22	1024.98	1276.44	1030.62	1053.62	1090.33	946.542	1038.07
AEN	999.032	-0.0700864	0.106835	-0.656027	0.511806	0.689083	974.62	1023.44	888.095	997.569	1038.2	997.537	1088.67	984.12
AES	2839.65	-0.50006	0.121096	-4.12945	3.64e-05	0.000422129	2352.08	3327.21	2005.37	2533.49	2517.37	3137.33	3710.57	3133.74
AFAP1	651.877	-0.591549	0.151425	-3.90655	9.36e-05	0.000929697	519.657	784.097	396.831	607.064	555.076	782.122	795.337	774.832
AFAP1-AS1	5.73447	-1.3567	0.874237	-1.55187	0.120694	0.262614	3.17377	8.29517	1.06104	4.3486	4.11168	13.2563	6.04819	5.58102
AFAP1L2	158.294	-0.538784	0.176998	-3.044	0.00233451	0.013133	128.854	187.734	118.837	144.373	123.35	202.159	170.357	190.685
AFF1	1852.29	0.495407	0.0918042	5.39634	6.8e-08	1.93e-06	2166.96	1537.62	2018.11	2283.01	2199.75	1523.37	1582.61	1506.88
AFF3	201.502	-0.300292	0.165552	-1.81388	0.0696961	0.177661	180.536	222.468	159.157	197.426	185.025	197.74	239.912	229.752
AFF4	5599.34	0.109294	0.0861972	1.26796	0.204813	0.3813	5810.8	5387.88	5616.11	6270.68	5545.62	5522.36	5348.62	5292.67
AFG3L1P	1394.4	0.0741163	0.10189	0.727418	0.46697	0.652371	1430.17	1358.63	1298.72	1443.73	1548.05	1359.88	1311.45	1404.56
AFG3L2	2418.87	0.0926283	0.0894943	1.03502	0.30066	0.494494	2496.72	2341.02	2579.4	2490.01	2420.75	2318.75	2209.61	2494.72
AFMID	659.933	-0.166606	0.115663	-1.44045	0.149741	0.306411	622.173	697.692	638.749	574.015	653.756	655.082	758.04	679.954
AFTPH	1653.64	0.245542	0.0935796	2.62389	0.00869331	0.0371194	1793.9	1513.37	1854.71	1728.13	1798.86	1588.55	1543.3	1408.28
AGA	298.435	-0.0130485	0.157336	-0.0829339	0.933904	0.967815	297.311	299.559	348.023	247.87	296.041	318.151	290.313	290.213
AGAP1	1560.47	-0.342835	0.102088	-3.35823	0.000784431	0.00542081	1375.46	1745.49	1246.73	1506.35	1373.3	1729.95	1803.37	1703.14
AGAP1-IT1	4.99458	-0.593575	0.862881	-0.687899	0.491516	NA	4.01973	5.96944	6.36627	2.60916	3.08376	4.41877	6.04819	7.44136
AGAP11	96.934	0.034863	0.211438	0.164885	0.869035	0.934505	98.0206	95.8474	103.982	96.5389	93.5406	110.469	88.7068	88.3661
AGAP2	273.001	-0.482567	0.181167	-2.66366	0.00772956	0.033804	227.727	318.275	185.683	237.434	260.063	269.545	382.044	303.235
AGAP2-AS1	18.6997	-0.926291	0.525506	-1.76266	0.0779571	0.191907	12.7851	24.6142	5.30522	21.743	11.3071	19.8845	24.1928	29.7654
AGAP3	1527.87	-0.568213	0.146174	-3.88724	0.00010139	0.000997893	1230.62	1825.13	1006.93	1316.76	1368.16	1663.67	2154.16	1657.56
AGAP4	142.924	-0.0751261	0.188593	-0.398351	0.690372	0.824311	139.381	146.467	152.79	134.807	130.546	122.621	163.301	153.478
AGAP5	118.398	-0.104787	0.192488	-0.54438	0.58618	0.74826	114.105	122.692	107.166	108.715	126.434	122.621	131.044	114.411
AGAP6	488.545	-0.0103509	0.132067	-0.0783762	0.937529	0.970041	486.619	490.47	430.784	485.304	543.769	505.949	517.12	448.342
AGAP7P	81.0489	0.107527	0.261346	0.411437	0.680752	0.817741	84.0873	78.0106	66.8458	71.317	114.099	82.8519	78.6265	72.5533
AGAP9	18.5929	-0.506341	0.454184	-1.11484	0.26492	0.454145	15.3818	21.804	11.6715	13.9155	20.5584	20.9891	21.1687	23.2542
AGBL2	122.087	1.26746	0.215304	5.88685	3.94e-09	1.43e-07	172.747	71.4266	205.843	153.071	159.327	61.8628	70.5622	81.855
AGBL3	19.1799	0.579847	0.482388	1.20203	0.229351	0.412104	22.9315	15.4284	25.4651	21.743	21.5863	17.6751	21.1687	7.44136
AGBL4	8.10185	-0.541469	0.69795	-0.775799	0.437868	0.627646	6.65538	9.54832	6.36627	4.3486	9.25127	6.62815	8.06426	13.9525
AGBL5	1374.67	-0.210791	0.0950013	-2.21882	0.0264987	0.0863503	1274.52	1474.82	1201.1	1275.88	1346.57	1431.68	1450.56	1542.22
AGER	293.56	-0.123772	0.144251	-0.858032	0.390875	0.585934	280.993	306.127	264.2	276.571	302.208	287.22	343.739	287.423
AGFG1	1496.71	0.150653	0.085287	1.76642	0.0773253	0.191172	1574.81	1418.61	1572.47	1546.36	1605.61	1425.05	1436.45	1394.32
AGFG2	555.101	-0.413015	0.139727	-2.95586	0.00311794	0.0164102	476.208	633.994	418.052	473.997	536.574	571.126	719.735	611.122
AGGF1	1878.81	0.210032	0.101273	2.07392	0.0380871	0.113967	2015.38	1742.24	2190	1924.69	1931.46	1862.51	1622.93	1741.28
AGK	1476.05	0.211095	0.0939331	2.24729	0.0246213	0.0817077	1583.97	1368.12	1631.89	1507.22	1612.8	1428.37	1287.26	1388.74
AGL	954.745	-0.125604	0.103949	-1.20833	0.226922	0.409391	912.816	996.673	880.667	975.826	881.954	1057.19	938.478	994.352
AGMAT	263.678	-0.334759	0.138506	-2.41692	0.0156524	0.058329	233.107	294.25	216.453	244.391	238.477	289.429	299.385	293.934
2001-08-01	1541.16	-0.0515267	0.0868611	-0.593208	0.553042	0.722844	1513.53	1568.79	1510.93	1557.67	1471.98	1578.61	1524.14	1603.61
2002-08-01	738.69	-0.807	0.156027	-5.17218	2.31e-07	5.69e-06	536.761	940.618	429.723	658.378	522.183	934.57	1035.25	852.036
2003-08-01	252.19	0.135115	0.13988	0.965938	0.334075	0.531487	263.961	240.419	273.75	265.265	252.868	249.66	228.823	242.774
2004-08-01	576.243	0.316311	0.125586	2.51867	0.0117798	0.0468205	639.156	513.331	672.702	655.769	588.998	536.88	450.59	552.521
AGPAT1	1145.99	-0.252311	0.10607	-2.37872	0.0173728	0.062942	1046.05	1245.93	982.527	1039.32	1116.32	1180.92	1358.83	1198.06
AGPAT2	356.993	-0.828897	0.219677	-3.77325	0.000161137	0.00146573	257.068	456.918	188.866	285.268	297.069	347.978	608.851	413.926
AGPAT3	2096.91	-0.136878	0.102727	-1.33245	0.182714	0.35268	1997.33	2196.49	1769.82	2088.2	2133.96	2116.59	2284.2	2188.69
AGPAT4	2.62911	1.55568	1.21869	1.27652	0.201771	NA	3.93387	1.32435	3.18313	3.47888	5.13959	1.10469	1.00803	1.86034
AGPAT5	1724.24	0.143537	0.0856521	1.67582	0.0937744	0.219322	1810.11	1638.37	1860.01	1772.49	1797.83	1652.62	1582.61	1679.89
AGPAT6	1639.21	-0.0263109	0.0877742	-0.299757	0.764362	0.873356	1624.02	1654.41	1579.9	1674.21	1617.94	1707.85	1586.64	1668.72
AGPAT9	70.9586	0.689333	0.254055	2.71332	0.00666123	0.0299331	87.7215	54.1957	94.433	78.2748	90.4569	54.1299	43.3454	65.1119
AGR2	2967.1	0.527234	0.121733	4.33108	1.48e-05	0.000199912	3503.66	2430.55	4125.34	3056.2	3329.43	2493.29	2283.19	2515.18
AGR3	33.0319	0.573197	0.373169	1.53602	0.124533	0.268473	39.4602	26.6036	43.5028	34.7888	40.0888	37.5595	17.1365	25.1146
AGRN	4328.67	-0.515421	0.377241	-1.36629	0.171847	0.336731	3563.48	5093.87	2208.03	4328.6	4153.82	3989.04	6904.01	4388.54
AGTPBP1	498.15	0.117896	0.124809	0.944611	0.344857	0.542319	518.465	477.834	570.842	509.656	474.899	511.472	448.574	473.457
AGTR1	170.444	0.266076	0.175253	1.51824	0.128954	0.275385	186.019	154.87	204.782	193.948	159.327	167.913	144.149	152.548
AGTRAP	349.827	-0.95629	0.219033	-4.36597	1.27e-05	0.000174146	237.896	461.757	154.913	245.261	313.515	389.956	542.321	452.993
AHCTF1	1998.83	0.0804211	0.0952326	0.84447	0.398407	0.592192	2054.17	1943.48	2035.08	2179.52	1947.91	2045.89	1814.46	1970.1
AHCTF1P1	42.5035	0.0301125	0.321331	0.0937116	0.925338	0.96287	42.981	42.026	42.4418	33.0494	53.4518	45.2924	46.3695	34.4163
AHCY	5670.76	-0.42931	0.0925432	-4.63902	3.5e-06	5.98e-05	4833.55	6507.98	4855.34	4530.37	5114.92	6217.21	7016.91	6289.81
AHCYL1	8120.99	0.0591385	0.0719888	0.821496	0.411364	0.603818	8287.35	7954.63	8153.07	8323.22	8385.76	8021.17	7828.38	8014.34
AHCYL2	835.423	0.0305525	0.106015	0.288189	0.773202	0.878863	844.196	826.65	828.676	906.248	797.665	781.017	836.666	862.268
AHDC1	195.496	-0.828628	0.193728	-4.27729	1.89e-05	0.000244086	140.844	250.147	126.264	151.331	144.937	193.321	300.394	256.727
AHI1	721.536	0.125081	0.105412	1.1866	0.235387	0.419551	752.825	690.247	793.662	740.132	724.683	718.05	653.205	699.488
AHNAK	44178	-0.373647	0.106667	-3.50293	0.000460172	0.00349088	38488.3	49867.8	33723.2	43990.4	37751.3	49018.5	50901.6	49683.2
AHNAK2	1166.57	-0.538639	0.151824	-3.54779	0.000388484	0.00304528	950.973	1382.17	745.914	1074.97	1032.03	1280.34	1593.7	1272.47
AHR	363.555	0.290183	0.132993	2.18194	0.0291136	0.0928633	399.98	327.129	394.709	387.895	417.335	353.501	289.305	338.582
AHRR	63.817	-0.508672	0.269516	-1.88735	0.0591126	0.157698	52.6517	74.9824	49.8691	55.6621	52.4239	64.0721	95.763	65.1119
AHSA1	5491.61	0.175943	0.0915056	1.92276	0.0545105	0.14864	5826.69	5156.52	6145.57	5404.44	5930.06	4861.75	5156.08	5451.73
AHSA2	1679.53	0.00649396	0.0871385	0.0745247	0.940593	0.971385	1683.18	1675.88	1723.14	1717.7	1608.69	1674.71	1717.69	1635.24
AIDA	1752.15	0.520005	0.091432	5.68735	1.29e-08	4.26e-07	2064.36	1439.94	2147.55	2030.8	2014.72	1534.42	1391.08	1394.32
AIF1L	3759.15	-0.350212	0.0766481	-4.56909	4.9e-06	7.89e-05	3305.26	4213.05	3269.08	3248.4	3398.3	4163.58	4260.95	4214.6
AIFM1	1570.27	0.177727	0.0988678	1.79762	0.0722366	0.182339	1667.13	1473.41	1834.55	1566.37	1600.47	1494.65	1447.53	1478.04
AIFM2	439.417	0.0312706	0.124632	0.250904	0.801889	0.895837	444.196	434.639	419.113	431.381	482.094	424.202	466.719	412.995
AIFM3	34.3671	-1.19376	0.385322	-3.09808	0.00194779	0.0112931	20.9124	47.8219	13.7936	19.1338	29.8096	41.9783	61.4899	39.9973
AIG1	746.585	0.0946207	0.10824	0.874172	0.382024	0.577689	771.181	721.989	840.347	739.262	733.934	745.667	697.558	722.742
AIM1	1140.69	-0.0950888	0.0992201	-0.958363	0.33788	0.53478	1102.87	1178.52	1024.97	1132.38	1151.27	1228.42	1123.96	1183.18
AIM1L	62.4544	-0.604344	0.278283	-2.17168	0.0298795	0.094722	49.5654	75.3433	44.5639	54.7924	49.3401	55.2346	91.7309	79.0644
AIMP1	1753.88	0.296838	0.115826	2.56279	0.0103836	0.0424451	1933.75	1574.01	2194.24	1785.53	1821.47	1716.69	1456.61	1548.73
AIMP2	537.382	-0.29508	0.126648	-2.32993	0.0198101	0.0695626	482.661	592.104	432.906	500.089	514.987	532.462	616.916	626.935
AIP	901.516	-0.597223	0.154903	-3.85548	0.000115505	0.00110801	717.347	1085.69	545.377	785.357	821.307	982.071	1189.48	1085.51
AIPL1	2.33239	-0.0224622	1.20051	-0.0187106	0.985072	NA	2.32614	2.33865	3.18313	1.73944	2.05584	2.20938	2.01606	2.79051
AJAP1	11.31	2.52492	0.68357	3.69372	0.000220993	0.00190982	19.2671	3.35295	12.7325	23.4824	21.5863	3.31408	3.0241	3.72068
AJUBA	1178.66	-0.208253	0.0990229	-2.10308	0.0354585	0.107912	1093.51	1263.81	1138.5	1102.8	1039.23	1354.35	1228.79	1208.29
AK1	511.25	-0.487676	0.13331	-3.65821	0.000253986	0.00214129	425.727	596.773	389.403	431.381	456.396	521.415	664.293	604.61
AK2	4303.07	0.396952	0.0820542	4.83767	1.31e-06	2.54e-05	4891.68	3714.47	5128.03	4624.3	4922.7	3675.31	3778.1	3689.98
AK3	2085.74	0.27637	0.108262	2.55279	0.0106865	0.0434202	2285.14	1886.34	2595.32	2105.59	2154.52	1960.83	1804.38	1893.83
AK4	4635.95	0.162325	0.0807176	2.01103	0.0443227	0.127608	4896.62	4375.28	5099.38	4667.79	4922.7	4496.1	4342.6	4287.15
AK6	586.016	0.295028	0.152722	1.9318	0.0533843	0.146521	645.932	526.099	796.845	565.318	575.635	558.974	479.823	539.499
AK7	837.413	0.0856049	0.104996	0.815312	0.414894	0.607048	862.56	812.267	931.597	813.188	842.893	809.739	785.257	841.804
AK8	50.9917	0.455119	0.284885	1.59755	0.110143	0.245834	58.859	43.1245	56.2354	61.7501	58.5914	47.5018	48.3855	33.4861
AK9	206.178	0.222667	0.16987	1.31081	0.189922	0.361824	222	190.356	235.552	210.472	219.975	222.043	159.269	189.755
AKAP1	2896.74	0.00326861	0.104042	0.0314161	0.974938	0.987103	2899.83	2893.65	2525.29	3054.46	3119.73	2837.95	2886	2957.01
AKAP10	1226.17	0.154295	0.0952936	1.61916	0.105414	0.237948	1291.81	1160.53	1376.18	1275.01	1224.25	1166.55	1130	1185.04
AKAP11	2810.87	0.0299221	0.101505	0.294786	0.768157	0.876097	2839.4	2782.34	2729.01	3097.07	2692.12	3030.17	2649.11	2667.73
AKAP12	277.145	0.0239236	0.145772	0.164117	0.869639	0.934563	279.401	274.89	275.872	299.184	263.147	248.556	305.434	270.679
AKAP13	1815.26	-0.126493	0.0873406	-1.44827	0.14754	0.303027	1735.32	1895.2	1701.92	1809.02	1695.04	1957.51	1902.16	1825.92
AKAP3	5.4896	2.46883	0.953496	2.58924	0.00961872	0.0401755	9.28662	1.69259	8.48836	12.1761	7.19543	2.20938	1.00803	1.86034
AKAP5	162.127	0.836981	0.184525	4.53586	5.74e-06	8.97e-05	207.693	116.56	213.27	193.948	215.863	139.191	111.892	98.598
AKAP6	23.0266	0.0154889	0.463335	0.0334292	0.973332	0.986425	23.0273	23.026	16.9767	35.6585	16.4467	22.0938	30.241	16.7431
AKAP7	141.588	1.61046	0.1938	8.30989	9.58e-17	6.58e-15	213.398	69.7784	227.064	209.602	203.528	71.805	58.4658	79.0644
AKAP8	999.894	0.013261	0.0958735	0.138317	0.88999	0.944921	1004.52	995.272	1048.31	1012.35	952.881	979.862	1018.11	987.841
AKAP8L	1844.13	0.0859814	0.103129	0.833727	0.404435	0.597661	1899.27	1788.99	1834.55	1942.08	1921.18	1586.34	1932.4	1848.25
AKAP9	4431.4	0.165369	0.0904222	1.82886	0.0674209	0.173769	4684.55	4178.26	4483.98	5093.08	4476.59	4341.44	4075.47	4117.86
AKIP1	254.549	-0.025019	0.152564	-0.16399	0.869739	0.934563	252.347	256.751	282.238	243.522	231.282	280.592	233.863	255.797
AKIRIN1	1609.31	0.240606	0.0915713	2.62753	0.0086008	0.0368155	1743.1	1475.53	1663.72	1742.05	1823.53	1526.68	1404.19	1495.71
AKIRIN2	577.647	0.162541	0.120795	1.34559	0.178433	0.346226	610.419	544.875	684.374	560.969	585.914	552.346	524.177	558.102
AKNA	190.959	-0.158297	0.190449	-0.831178	0.405873	0.598988	180.377	201.541	133.692	195.687	211.751	194.426	204.63	205.568
AKR1A1	942.002	-0.138465	0.104621	-1.3235	0.185671	0.356521	896.959	987.045	922.048	905.378	863.452	911.371	1067.51	982.26
AKR1C1	27.4079	0.160729	0.398458	0.403377	0.686671	0.821572	28.9612	25.8546	35.0145	20.0036	31.8655	33.1408	21.1687	23.2542
AKR1C2	32.3818	-0.282989	0.366695	-0.771727	0.440276	0.629586	29.1343	35.6293	33.9534	33.9191	19.5305	43.083	31.249	32.5559
AKR1C6P	2.28491	0.342265	1.23189	0.277838	0.781137	NA	2.54123	2.0286	1.06104	3.47888	3.08376	2.20938	2.01606	1.86034
AKR1E2	141.169	0.0301557	0.173929	0.17338	0.862353	0.931831	142.567	139.772	134.753	146.983	145.964	144.715	135.076	139.525
AKR7A2	1536.48	-0.333823	0.110046	-3.03349	0.00241739	0.013453	1359.58	1713.37	1260.52	1363.72	1454.51	1553.2	1893.08	1693.84
AKR7A2P1	4.48873	-0.145338	0.948263	-0.153268	0.878187	NA	4.26794	4.70953	7.42731	4.3486	1.02792	5.52346	3.0241	5.58102
AKR7A3	27.6772	-0.75587	0.376728	-2.00641	0.0448126	0.128755	20.5832	34.7711	20.1599	20.0036	21.5863	33.1408	42.3373	28.8353
AKR7L	30.7654	-0.141881	0.405259	-0.350099	0.726264	0.848183	29.4228	32.108	41.3807	19.1338	27.7538	24.3032	29.2329	42.7878
AKT1	10561.5	-0.664943	0.160239	-4.1497	3.33e-05	0.000391451	8169.48	12953.5	5940.79	9039.87	9527.78	12023.5	14711.2	12125.7
AKT1S1	1057.1	-0.678569	0.144765	-4.68739	2.77e-06	4.9e-05	812.951	1301.25	665.275	834.061	939.518	1138.94	1461.65	1303.17
AKT2	3281.62	-0.469499	0.163292	-2.87521	0.00403758	0.0200151	2752.09	3811.14	2003.25	3033.58	3219.44	3455.48	4357.72	3620.22
AKT3	4.62841	0.336678	0.926742	0.363292	0.716387	NA	5.13519	4.12163	2.12209	6.08804	7.19543	6.62815	2.01606	3.72068
AKTIP	671.176	0.226688	0.109504	2.07013	0.0384402	0.114698	723.811	618.541	758.647	720.998	691.789	644.035	572.562	639.027
ALAD	1130.12	-0.177415	0.0899671	-1.972	0.0486101	0.136582	1060.55	1199.68	1038.76	1092.37	1050.53	1200.8	1195.53	1202.71
ALAS1	1363.85	0.156539	0.0999705	1.56585	0.117384	0.257661	1438.1	1289.59	1382.54	1383.72	1548.05	1206.32	1316.49	1345.96
ALCAM	1139.07	-0.0347237	0.0927891	-0.374221	0.70824	0.835621	1125.22	1152.91	1145.93	1134.98	1094.73	1203.01	1108.84	1146.9
ALDH16A1	439.256	-0.791635	0.196995	-4.01855	5.86e-05	0.000631609	321.595	556.918	270.566	342.67	351.548	447.4	748.968	474.387
ALDH18A1	3876.63	-0.00100095	0.0775558	-0.0129061	0.989703	0.993798	3875.57	3877.69	3989.53	3810.24	3826.94	3787.99	3890	3955.08
ALDH1A3	52.6779	-0.228541	0.319632	-0.715012	0.474602	0.659117	48.609	56.7469	61.5406	45.2254	39.0609	57.444	39.3132	73.4834
ALDH1B1	860.46	-0.149983	0.119619	-1.25384	0.209901	0.387624	815.879	905.04	781.99	822.755	842.893	798.692	1027.18	889.243
ALDH1L2	148.414	0.0470552	0.172055	0.273489	0.784477	0.885861	150.795	146.033	158.096	156.55	137.741	145.819	147.173	145.107
ALDH2	29.3689	-0.431089	0.396083	-1.08838	0.276428	0.466416	25.1438	33.5939	32.8924	14.7852	27.7538	35.3501	28.2249	37.2068
ALDH3A2	2957.96	0.159867	0.082228	1.9442	0.0518718	0.143537	3121.85	2794.07	3248.92	3065.76	3050.86	2823.59	2696.49	2862.13
ALDH3B1	39.6573	-0.309788	0.322029	-0.961989	0.336055	0.533324	35.409	43.9056	26.5261	36.5282	43.1726	39.7689	46.3695	45.5783
ALDH3B2	1424.11	-0.485729	0.106342	-4.56761	4.93e-06	7.93e-05	1186.45	1661.76	1081.2	1227.17	1250.98	1574.19	1808.41	1602.68
ALDH4A1	828.244	-0.779682	0.155266	-5.0216	5.12e-07	1.13e-05	609.697	1046.79	485.959	623.589	719.543	910.266	1186.45	1043.65
ALDH5A1	1442.13	0.0381763	0.0869934	0.438842	0.660776	0.80407	1461.35	1422.9	1511.99	1446.34	1425.72	1399.64	1438.46	1430.6
ALDH6A1	1601.91	-0.23734	0.0886674	-2.67675	0.00743411	0.0327612	1470.36	1733.46	1503.5	1482.87	1424.7	1792.92	1653.17	1754.3
ALDH7A1	2801.52	0.0841834	0.0987948	0.852104	0.394156	0.588354	2883.64	2719.41	3200.11	2708.31	2742.49	2698.76	2628.95	2830.51
ALDH8A1	2.75086	-0.157281	1.23489	-0.127364	0.898652	NA	2.62709	2.87464	4.24418	2.60916	1.02792	1.10469	1.00803	6.51119
ALDH9A1	2276.49	0.137512	0.0961948	1.42951	0.152857	0.311187	2384.93	2168.04	2552.87	2289.1	2312.82	2314.33	2027.15	2162.65
ALDOA	53718.6	-0.436913	0.160998	-2.71378	0.00665197	0.0299262	45645.8	61791.4	33409.1	47946.8	55581.6	57460.6	70066.3	57847.3
ALDOC	2909.71	0.100602	0.0898714	1.1194	0.262971	0.451751	3011.37	2808.04	2930.61	2979.66	3123.85	2605.97	2973.69	2844.46
ALG1	422.564	-0.283367	0.144816	-1.95674	0.0503786	0.140306	381.075	464.054	325.741	416.596	400.888	412.05	514.096	466.015
ALG10	653.942	0.10249	0.102005	1.00475	0.315015	0.509998	677.282	630.602	691.801	668.815	671.231	615.313	642.116	634.376
ALG10B	783.57	0.0697297	0.11197	0.622751	0.533448	0.707118	802.084	765.055	793.662	837.54	775.051	849.508	724.775	720.882
ALG11	177.252	0.137513	0.17267	0.796393	0.425804	0.616948	185.512	168.992	181.439	209.602	165.495	178.96	152.213	175.802
ALG12	377.073	-0.732514	0.168053	-4.35883	1.31e-05	0.000179132	283.164	470.981	219.636	312.229	317.627	420.888	536.273	455.783
ALG13	703.204	0.144488	0.108703	1.3292	0.183783	0.354222	738.559	667.85	797.906	699.255	718.515	688.223	639.092	676.234
ALG14	153.87	0.0425068	0.174674	0.243349	0.807735	0.898817	156.331	151.409	170.828	140.895	157.272	141.401	160.277	152.548
ALG1L	148.654	-0.59836	0.18902	-3.16559	0.00154767	0.00941647	118.449	178.86	129.447	97.4086	128.49	182.274	191.526	162.78
ALG1L2	6.44398	-0.147507	0.854533	-0.172617	0.862952	0.93189	6.09077	6.79718	5.30522	7.82748	5.13959	4.41877	14.1124	1.86034
ALG1L9P	61.4577	-0.276751	0.262222	-1.05541	0.291239	0.483561	55.4232	67.4922	47.747	66.0987	52.4239	74.0144	61.4899	66.9722
ALG2	916.599	0.160939	0.106264	1.51451	0.129896	0.276788	967.974	865.225	1041.95	901.899	960.076	831.833	918.317	845.525
ALG3	1081.95	-0.276526	0.112712	-2.45338	0.0141521	0.0540358	978.449	1185.45	858.385	1014.09	1062.87	1130.1	1244.92	1181.32
ALG5	840.59	0.49956	0.126414	3.95177	7.76e-05	0.000792126	984.889	696.292	1150.17	873.199	931.295	716.945	697.558	674.373
ALG6	520.565	0.177578	0.12795	1.38787	0.165178	0.32822	552.825	488.306	615.406	493.131	549.937	508.158	452.606	504.152
ALG8	1652.13	0.182381	0.0956701	1.90635	0.056605	0.153087	1756.62	1547.64	1863.19	1621.16	1785.5	1584.13	1570.51	1488.27
ALG9	630.788	0.145398	0.113453	1.28157	0.199994	0.375346	662.867	598.709	658.909	618.371	711.32	584.382	574.578	637.166
ALKBH1	632.943	0.319603	0.10756	2.9714	0.00296443	0.0157788	702.675	563.212	738.487	693.167	676.371	589.906	557.442	542.289
ALKBH2	1043.48	-0.0464091	0.106209	-0.43696	0.662141	0.805099	1026.67	1060.29	928.414	1067.15	1084.45	1003.06	1075.57	1102.25
ALKBH3	297.217	0.115934	0.129842	0.892885	0.371919	0.567566	309.243	285.192	311.947	299.184	316.599	282.801	286.281	286.492
ALKBH3-AS1	7.5883	-0.298596	0.79814	-0.374115	0.708319	0.83565	6.7454	8.43121	7.42731	8.6972	4.11168	14.361	9.07229	1.86034
ALKBH4	357.71	-0.360558	0.137201	-2.62797	0.00858973	0.0367783	313.096	402.324	289.665	339.191	310.432	368.967	444.542	393.462
ALKBH5	2538.38	-0.0297194	0.122465	-0.242677	0.808255	0.898956	2512.01	2564.75	2063.73	2669.17	2803.13	2493.29	2678.34	2522.62
ALKBH6	500.912	-0.218967	0.127404	-1.71868	0.0856727	0.205649	463.02	538.804	409.563	469.649	509.848	503.74	544.337	568.334
ALKBH7	140.915	-0.878033	0.205131	-4.28036	1.87e-05	0.000241344	99.1436	182.686	82.7615	113.933	100.736	160.18	216.727	171.151
ALKBH8	276.327	0.048571	0.150481	0.322772	0.746868	0.862573	280.811	271.843	302.398	286.138	253.896	307.104	247.976	260.448
ALMS1	1733.49	-0.0106326	0.109643	-0.0969747	0.922747	0.961677	1726.52	1740.45	1560.8	1963.83	1654.95	1784.08	1749.94	1687.33
ALMS1-IT1	32.8328	0.555556	0.344829	1.61111	0.107156	0.24076	39.0554	26.6102	35.0145	40.0071	42.1447	29.8267	21.1687	28.8353
ALMS1P	19.7071	3.60496	0.622854	5.78781	7.13e-09	2.43e-07	36.4877	2.92655	33.9534	42.6163	32.8934	1.10469	3.0241	4.65085
ALOX12	99.8109	-0.452501	0.234025	-1.93356	0.0531677	0.146103	84.2936	115.328	68.9679	85.2325	98.6802	96.1082	140.116	109.76
ALOX12-AS1	29.9426	-0.919386	0.378287	-2.43039	0.0150825	0.0566948	20.755	39.1303	26.5261	18.2641	17.4746	45.2924	30.241	41.8576
ALOX12B	25.0967	-0.215669	0.405483	-0.531881	0.594808	0.75462	23.1372	27.0563	14.8546	27.831	26.7259	30.9314	24.1928	26.0448
ALOX12P2	513.937	-0.245911	0.1346	-1.82698	0.0677026	0.174264	470.213	557.662	462.616	507.047	440.977	483.855	631.028	558.102
ALOX15	621.579	-0.461285	0.115128	-4.00669	6.16e-05	0.000658647	522.819	720.34	470.043	539.226	559.188	727.992	741.911	691.116
ALOX15B	3.46251	-0.180499	1.08365	-0.166567	0.867711	NA	3.24859	3.67643	3.18313	3.47888	3.08376	1.10469	8.06426	1.86034
ALOX15P1	15.1713	-0.19629	0.511778	-0.383544	0.701316	0.831613	14.0681	16.2744	9.5494	18.2641	14.3909	16.5704	20.1606	12.0922
ALOX5	4.36666	-0.0759394	0.922898	-0.0822836	0.934421	NA	4.22378	4.50955	3.18313	4.3486	5.13959	6.62815	5.04016	1.86034
ALOXE3	150.918	0.195547	0.187093	1.04519	0.295937	0.489319	160.99	140.846	134.753	165.247	182.97	146.924	148.181	127.433
ALPK1	293.512	0.343032	0.141599	2.42257	0.0154113	0.0576004	327.999	259.025	316.191	363.543	304.264	271.754	243.944	261.378
ALPK3	115.759	-0.395838	0.206236	-1.91935	0.0549406	0.149629	100.107	131.411	101.86	84.3628	114.099	142.505	115.924	135.805
ALS2	1193.84	0.136433	0.0976937	1.39653	0.162554	0.324836	1250.55	1137.13	1321	1154.99	1275.65	1154.4	1112.87	1144.11
ALS2CL	146.078	-0.75581	0.202073	-3.74028	0.000183814	0.00163776	108.568	183.589	81.7005	116.542	127.462	169.018	197.574	184.174
ALS2CR12	8.77418	-0.451695	0.653067	-0.691651	0.489157	0.66986	7.3669	10.1815	6.36627	9.56692	6.16751	13.2563	7.05622	10.2319
ALX3	134.296	-0.415872	0.195073	-2.13188	0.033017	0.102287	115.053	153.539	94.433	119.152	131.574	148.029	145.157	167.431
ALYREF	1663.62	-0.375014	0.10758	-3.48591	0.000490461	0.00367396	1448.62	1878.62	1309.33	1435.04	1601.5	1790.71	2009.01	1836.16
AMACR	17.5773	-0.425653	0.481384	-0.884227	0.376574	0.571954	14.9072	20.2475	11.6715	21.743	11.3071	19.8845	23.1847	17.6732
AMBP	31.9406	-0.788136	0.353831	-2.22744	0.025918	0.0850294	23.445	40.4363	19.0988	23.4824	27.7538	34.2455	43.3454	43.718
AMBRA1	938.549	0.0362352	0.121432	0.298399	0.765398	0.87414	950.183	926.916	811.699	1008.88	1029.97	877.126	981.823	921.798
AMD1	3828.29	0.090362	0.0998416	0.905054	0.365437	0.561469	3948.32	3708.27	4400.15	3765.89	3678.92	3856.48	3528.11	3740.21
AMDHD1	11.6879	0.133024	0.683041	0.194753	0.845586	0.921589	12.1415	11.2343	4.24418	20.8733	11.3071	16.5704	5.04016	12.0922
AMDHD2	257.207	-1.45862	0.274236	-5.31884	1.04e-07	2.86e-06	136.964	377.45	82.7615	173.944	154.188	346.873	523.169	262.308
AMER1	755.669	0.239785	0.116571	2.05698	0.0396877	0.117377	817.972	693.365	729.999	914.945	808.972	689.328	700.582	690.186
AMFR	1974.11	-0.200436	0.0861081	-2.32773	0.0199264	0.0697673	1837.02	2111.2	1768.76	1906.43	1835.86	2116.59	2042.27	2174.74
AMH	114.233	-1.02281	0.26585	-3.84731	0.000119421	0.00114134	75.0829	153.383	55.1743	99.1481	70.9264	142.505	198.582	119.062
AMIGO1	326.112	0.0116279	0.147492	0.0788378	0.937162	0.970036	327.222	325.002	276.933	369.631	335.102	307.104	337.691	330.21
AMIGO2	579.973	0.715041	0.107855	6.62964	3.37e-11	1.57e-09	720.843	439.104	734.243	714.91	713.376	450.714	417.325	449.272
AMIGO3	74.0349	-1.12308	0.288976	-3.88642	0.000101734	0.00100001	46.6112	101.459	39.2587	46.0952	54.4797	75.1191	138.1	91.1567
AMMECR1	417.116	0.20905	0.122808	1.70224	0.0887099	0.210852	447.113	387.119	468.982	453.994	418.363	412.05	380.028	369.277
AMMECR1L	1681.27	0.0970395	0.0830822	1.16799	0.242809	0.428596	1737.69	1624.86	1704.04	1753.36	1755.69	1638.26	1616.88	1619.43
AMN1	217.795	0.125916	0.199562	0.63096	0.528067	0.702445	227.306	208.284	264.2	184.381	233.338	260.707	174.39	189.755
AMOT	27.5136	0.185835	0.385676	0.481842	0.629918	0.781469	29.3146	25.7126	36.0755	31.3099	20.5584	22.0938	26.2088	28.8353
AMOTL1	2060.34	-0.293861	0.0979975	-2.99866	0.00271169	0.0147419	1850.96	2269.71	1682.82	1961.22	1908.85	2179.56	2386.01	2243.57
AMOTL2	2572.23	-0.160612	0.099226	-1.61865	0.105522	0.238019	2428.92	2715.54	2178.32	2544.8	2563.63	2655.68	2855.75	2635.17
AMPD1	31.7126	0.121417	0.350886	0.346029	0.729321	0.850433	32.9578	30.4674	26.5261	37.398	34.9492	35.3501	27.2169	28.8353
AMPD2	1891.55	-0.631352	0.162104	-3.89473	9.83e-05	0.000971272	1483.91	2299.19	1093.94	1618.55	1739.24	2125.43	2629.96	2142.18
AMPD3	131.702	0.507303	0.191848	2.6443	0.00818589	0.0353526	154.625	108.78	141.119	158.289	164.467	112.679	92.7389	120.922
AMPH	7.38407	1.56006	0.755945	2.06372	0.0390444	0.115849	10.9888	3.77936	7.42731	12.1761	13.3629	5.52346	3.0241	2.79051
AMT	158.415	0.0810214	0.186558	0.434295	0.664074	0.806565	163.082	153.748	176.133	132.197	180.914	148.029	165.317	147.897
AMY2B	21.6107	0.187898	0.454443	0.41347	0.679263	0.816995	23.1101	20.1114	35.0145	14.7852	19.5305	18.7798	20.1606	21.3939
AMZ1	1000.54	-0.490319	0.141818	-3.45738	0.000545452	0.00403333	832.029	1169.05	700.29	864.502	931.295	1050.56	1360.84	1095.74
AMZ2	2811.12	0.0905817	0.103911	0.871722	0.38336	0.57871	2899.61	2722.62	3263.77	2664.82	2770.24	2828.01	2609.79	2730.05
AMZ2P1	340.798	0.135216	0.132962	1.01695	0.309176	0.503592	356.982	324.614	393.648	333.972	343.325	311.523	337.691	324.629
ANAPC1	3290.95	-0.0682928	0.0855399	-0.798374	0.424654	0.615698	3212.57	3369.33	3125.84	3418.87	3093.01	3478.68	3323.48	3305.82
ANAPC10	261.709	0.377536	0.161572	2.33664	0.0194581	0.068656	295.791	227.628	343.779	260.916	282.678	254.079	216.727	212.079
ANAPC11	1052.34	-0.877853	0.160363	-5.47415	4.4e-08	1.29e-06	741.425	1363.26	589.941	836.67	797.665	1196.38	1645.11	1248.29
ANAPC13	1674.41	0.349709	0.125997	2.77555	0.00551092	0.0256275	1876.56	1472.26	2225.01	1705.52	1699.15	1550.99	1371.93	1493.85
ANAPC15	198.013	-0.422254	0.169264	-2.49465	0.012608	0.049504	169.358	226.669	174.011	169.595	164.467	191.112	260.072	228.822
ANAPC16	2847.46	0.0301772	0.102688	0.293872	0.768856	0.876317	2877.46	2817.46	3224.52	2644.82	2763.05	2950.63	2754.95	2746.79
ANAPC2	649.843	-1.02852	0.207271	-4.96222	6.97e-07	1.47e-05	427.249	872.436	300.276	509.656	471.815	757.819	1133.03	726.463
ANAPC4	1396.03	0.243939	0.102766	2.37373	0.0176096	0.0634888	1513.93	1278.13	1660.54	1407.21	1474.04	1342.2	1231.81	1260.38
ANAPC5	5422.2	-0.134013	0.0768325	-1.74423	0.0811198	0.1975	5170.48	5673.92	5004.95	5130.48	5376.02	5728.93	5691.35	5601.48
ANAPC7	2753.77	0.124212	0.103228	1.20328	0.228866	0.411662	2872.52	2635.02	3236.19	2660.47	2720.9	2713.12	2537.22	2654.71
ANG	18.884	0.599232	0.469915	1.27519	0.202242	0.377502	22.6567	15.1112	24.404	26.0916	17.4746	20.9891	14.1124	10.2319
ANGEL1	2512.24	-0.0786798	0.0971212	-0.810119	0.417872	0.609853	2443.55	2580.94	2203.79	2516.97	2609.89	2539.69	2682.37	2520.76
ANGEL2	626.373	0.133326	0.112702	1.18299	0.236812	0.42125	655.125	597.621	674.824	635.765	654.784	649.559	591.715	551.591
ANGPT1	4.87068	-0.470911	0.923506	-0.509916	0.61011	NA	4.04349	5.69787	1.06104	6.95776	4.11168	6.62815	3.0241	7.44136
ANGPT2	5.59657	0.311525	0.823415	0.378333	0.705183	0.834049	6.21832	4.97483	7.42731	6.08804	5.13959	2.20938	8.06426	4.65085
ANGPTL1	4.84872	-0.343585	0.948074	-0.362404	0.71705	NA	4.27651	5.42092	3.18313	3.47888	6.16751	3.31408	11.0884	1.86034
ANGPTL2	3.77685	0.0899346	1.03163	0.0871771	0.930531	NA	3.90322	3.65048	5.30522	4.3486	2.05584	1.10469	7.05622	2.79051
ANGPTL4	239.444	0.460105	0.200631	2.29329	0.0218315	0.0748171	277.201	201.686	203.721	283.529	344.353	196.635	229.831	178.593
ANGPTL6	10.736	0.243369	0.635015	0.383249	0.701535	0.831636	11.6589	9.81324	8.48836	6.95776	19.5305	12.1516	7.05622	10.2319
ANK1	18.8148	-0.520161	0.454771	-1.14379	0.252712	0.439971	15.5093	22.1203	13.7936	12.1761	20.5584	22.0938	19.1526	25.1146
ANK2	17.0688	-0.932042	0.527434	-1.76713	0.0772071	0.191091	11.6365	22.5011	6.36627	18.2641	10.2792	25.4079	15.1205	26.9749
ANK3	1539.5	-0.0377616	0.0979724	-0.38543	0.699919	0.830728	1519.08	1559.91	1553.37	1620.29	1383.58	1589.65	1518.1	1571.99
ANKAR	63.6713	0.0911426	0.27104	0.33627	0.736667	0.855102	65.4834	61.8593	64.7237	78.2748	53.4518	74.0144	59.4739	52.0895
ANKDD1A	110.922	0.101801	0.199638	0.509928	0.610102	0.767063	114.812	107.032	109.288	108.715	126.434	109.365	115.924	95.8075
ANKEF1	480.763	0.15765	0.113315	1.39125	0.164149	0.326802	506.786	454.74	487.02	529.659	503.68	468.389	446.558	449.272
ANKFY1	4279.78	0.862216	0.104542	8.24753	1.62e-16	1.1e-14	5521.74	3037.82	4799.11	5908.01	5858.11	2949.53	3151.11	3012.82
ANKH	674.084	-0.107368	0.110048	-0.975643	0.329242	0.526441	648.969	699.199	622.833	677.512	646.561	693.747	653.205	750.647
ANKHD1	285.514	0.540468	0.165735	3.26104	0.00111005	0.00717881	338.419	232.609	410.624	309.62	295.013	252.974	219.751	225.101
ANKHD1-EIF4EBP3	4.44013	0.0783922	0.895285	0.0875611	0.930225	NA	4.57746	4.30281	4.24418	4.3486	5.13959	2.20938	6.04819	4.65085
ANKIB1	4888.35	0.417706	0.0840607	4.9691	6.73e-07	1.43e-05	5590.66	4186.05	5532.29	5705.36	5534.32	4485.05	4036.16	4036.94
ANKLE1	11.0008	0.0155084	0.588582	0.0263487	0.978979	0.98869	11.0967	10.9049	12.7325	11.3064	9.25127	8.83754	8.06426	15.8129
ANKLE2	4108.83	0.0174167	0.0768276	0.226698	0.820659	0.907256	4133.45	4084.21	4023.48	4145.95	4230.91	4170.21	4060.35	4022.06
ANKMY1	332.817	-0.663107	0.159773	-4.15032	3.32e-05	0.000390981	257.317	408.317	202.66	283.529	285.761	430.83	418.333	375.789
ANKMY2	508.843	0.448161	0.146332	3.06264	0.00219397	0.0124872	587.093	430.592	651.482	600.976	508.82	489.379	368.94	433.459
ANKRA2	356.472	0.27037	0.151097	1.78938	0.073553	0.184757	389.782	323.162	420.174	351.367	397.805	373.386	275.193	320.909
ANKRD10	1113.71	0.24539	0.0945148	2.59631	0.00942316	0.0395035	1208.57	1018.86	1245.67	1150.64	1229.39	988.699	1013.07	1054.81
ANKRD11	2722.34	-0.337569	0.130614	-2.58449	0.00975243	0.0405811	2404.93	3039.76	2013.86	2737.01	2463.92	2799.29	3425.29	2894.69
ANKRD12	1707.73	0.181733	0.0988816	1.83788	0.06608	0.171338	1814.72	1600.74	1845.16	1902.95	1696.07	1729.95	1528.18	1544.08
ANKRD13A	1281.94	0.00795943	0.0879681	0.0904808	0.927905	0.964119	1285.39	1278.49	1273.25	1278.49	1304.43	1314.58	1253.99	1266.89
ANKRD13B	414.651	-0.482785	0.167452	-2.88312	0.00393753	0.0196446	345.706	483.595	272.689	374.849	389.581	451.819	565.506	433.459
ANKRD13C	566.057	0.0784109	0.13141	0.596689	0.550715	0.721043	581.328	550.786	641.932	553.142	548.909	598.743	574.578	479.038
ANKRD13D	704.94	-0.78337	0.186399	-4.20265	2.64e-05	0.000322658	517.857	892.023	368.183	592.279	593.109	803.111	1078.59	794.365
ANKRD16	246.592	-0.28591	0.150474	-1.90006	0.0574249	0.154678	222.138	271.046	205.843	220.039	240.533	276.173	292.329	244.635
ANKRD17	3633.29	0.086808	0.09356	0.927833	0.353494	0.550542	3742.04	3524.54	3495.08	4079.86	3651.17	3662.05	3389	3522.55
ANKRD18A	268.742	0.0392063	0.145253	0.269918	0.787224	0.887009	272.636	264.847	304.52	246.131	267.259	264.021	257.048	273.47
ANKRD18B	267.161	-0.176922	0.144561	-1.22385	0.221007	0.401669	250.761	283.562	271.627	245.261	235.393	309.314	265.112	276.26
ANKRD19P	11.5216	0.316158	0.636132	0.497001	0.619188	0.77416	12.7972	10.2459	19.0988	6.95776	12.335	15.4657	5.04016	10.2319
ANKRD2	3.28963	-0.971941	1.14226	-0.850891	0.39483	NA	2.19859	4.38067	1.06104	3.47888	2.05584	2.20938	9.07229	1.86034
ANKRD20A11P	16.4863	-0.0922244	0.536126	-0.17202	0.863422	0.932101	15.8517	17.121	13.7936	23.4824	10.2792	19.8845	22.1767	9.3017
ANKRD20A12P	88.0015	-0.00327165	0.223657	-0.014628	0.988329	0.993072	87.8044	88.1987	92.3109	99.1481	71.9543	88.3754	89.7148	86.5058
ANKRD20A19P	50.7246	-0.641503	0.312396	-2.05349	0.0400247	0.118126	39.5494	61.8999	31.8313	42.6163	44.2005	58.5487	80.6426	46.5085
ANKRD20A4	4.75112	-0.259734	0.935273	-0.27771	0.781235	NA	4.32068	5.18157	7.42731	3.47888	2.05584	6.62815	7.05622	1.86034
ANKRD20A5P	221.484	-0.0951145	0.158643	-0.599551	0.548805	0.719426	214.116	228.852	230.247	209.602	202.5	237.509	249.992	199.056
ANKRD20A9P	668.418	0.142018	0.111862	1.26958	0.204236	0.38033	701.077	635.759	706.656	747.959	648.617	658.396	597.763	651.119
ANKRD23	171.121	-0.805431	0.205139	-3.92626	8.63e-05	0.000867476	124.396	217.846	100.799	135.676	136.713	202.159	268.136	183.243
ANKRD24	32.5533	-0.211978	0.355621	-0.596079	0.551122	0.721428	30.0518	35.0548	23.343	33.9191	32.8934	41.9783	35.2811	27.9051
ANKRD26	812.27	0.118897	0.107608	1.1049	0.269201	0.458345	845.287	779.252	817.005	920.164	798.693	806.425	786.265	745.066
ANKRD27	1873.59	-0.0275922	0.0851514	-0.324037	0.74591	0.861917	1855.42	1891.76	1810.14	1915.12	1841	1885.71	1951.55	1838.02
ANKRD28	3579.2	0.15533	0.0826309	1.8798	0.0601352	0.159712	3771.61	3386.8	3877.06	3685.87	3751.9	3568.16	3265.02	3327.22
ANKRD29	6.69137	0.0800247	0.756331	0.105806	0.915736	0.957842	6.85086	6.53188	7.42731	6.95776	6.16751	7.73284	9.07229	2.79051
ANKRD30A	630.989	0.0345755	0.124687	0.277298	0.781551	0.884466	638.037	623.941	605.857	719.258	588.998	673.862	612.883	585.077
ANKRD30B	60.3222	0.301164	0.27078	1.11221	0.266049	0.454974	66.6679	53.9765	72.151	71.317	56.5355	47.5018	48.3855	66.0421
ANKRD31	45.235	0.330549	0.320962	1.02987	0.303071	0.497143	50.2667	40.2033	56.2354	56.5318	38.033	51.9205	34.2731	34.4163
ANKRD32	684.237	0.135511	0.117278	1.15547	0.247899	0.434762	716.06	652.414	733.182	765.353	649.645	700.375	604.819	652.049
ANKRD33B	12.0436	1.45331	0.590671	2.46043	0.013877	0.0532209	17.6135	6.47371	15.9157	17.3944	19.5305	6.62815	9.07229	3.72068
ANKRD34A	405.424	0.0757274	0.13843	0.547045	0.584348	0.747028	415.885	394.964	355.45	429.642	462.564	396.584	415.309	372.998
ANKRD34B	31.7916	0.0679963	0.397052	0.171253	0.864025	0.932517	32.5602	31.0231	21.2209	26.0916	50.368	33.1408	29.2329	30.6956
ANKRD35	3.42119	-0.164879	1.02039	-0.161583	0.871634	NA	3.23755	3.60483	2.12209	3.47888	4.11168	2.20938	3.0241	5.58102
ANKRD36	567.558	-0.191751	0.131141	-1.46217	0.143694	0.297607	529.533	605.583	525.217	601.846	461.536	637.407	564.498	614.842
ANKRD36B	269.269	-0.0424402	0.150708	-0.281604	0.778247	0.882272	265.08	273.458	267.383	296.574	231.282	287.22	255.032	278.121
ANKRD36BP1	135.515	-0.144926	0.186154	-0.778526	0.436259	0.626149	128.616	142.414	138.997	134.807	112.043	154.657	133.06	139.525
ANKRD36C	466.068	-0.328849	0.180105	-1.82588	0.067869	0.174577	412.681	519.454	328.924	540.096	369.023	525.833	566.514	466.015
ANKRD37	54.3759	-0.228064	0.281276	-0.81082	0.417469	0.609495	50.0246	58.7272	45.6249	53.0529	51.3959	55.2346	72.5783	48.3688
ANKRD39	189.62	-0.860612	0.18435	-4.66836	3.04e-06	5.32e-05	134.519	244.722	126.264	142.634	134.657	241.928	291.321	200.917
ANKRD40	2132.03	0.0341456	0.0833097	0.409863	0.681906	0.818309	2157.02	2107.04	2101.93	2201.26	2167.88	2174.03	2040.26	2106.84
ANKRD42	322.493	0.0814566	0.12803	0.636231	0.524626	0.699458	331.627	313.358	327.863	322.666	344.353	322.57	299.385	318.118
ANKRD44	153.005	0.0304021	0.16886	0.180043	0.857119	0.929318	154.621	151.388	155.974	160.898	146.992	146.924	148.181	159.059
ANKRD46	550.747	0.239052	0.111639	2.1413	0.0322501	0.100472	596.465	505.029	637.688	562.709	588.998	503.74	509.056	502.292
ANKRD49	347.405	0.156549	0.140545	1.11388	0.265332	0.454449	366.296	328.515	414.869	336.582	347.437	355.711	314.506	315.328
ANKRD50	1699.05	-0.282096	0.0969091	-2.91094	0.00360344	0.0184012	1533.05	1865.06	1525.78	1650.73	1422.64	1939.84	1791.27	1864.06
ANKRD52	4756.3	-0.499102	0.110312	-4.52447	6.05e-06	9.37e-05	3941.34	5571.25	3338.05	4269.45	4216.52	5397.53	5669.17	5647.06
ANKRD53	3.45259	-0.236652	1.03855	-0.227869	0.819748	NA	3.13208	3.77309	2.12209	5.21832	2.05584	4.41877	5.04016	1.86034
ANKRD54	435.83	-0.164929	0.114621	-1.43891	0.150177	0.30706	410.904	460.756	401.075	412.247	419.391	458.447	471.759	452.063
ANKRD6	241.879	-0.109664	0.143296	-0.765297	0.444095	0.632483	232.679	251.079	226.003	241.782	230.254	247.451	237.896	267.889
ANKRD61	131.299	-0.207588	0.192806	-1.07666	0.28163	0.472165	121.612	140.987	109.288	143.504	112.043	149.133	137.092	136.735
ANKRD62	3.19548	-1.26859	1.15561	-1.09777	0.272305	NA	1.85595	4.535	1.06104	3.47888	1.02792	2.20938	3.0241	8.37153
ANKRD9	246.967	-0.192635	0.174379	-1.1047	0.269291	0.458398	230.329	263.605	195.232	258.307	237.449	236.404	313.498	240.914
ANKS1A	1104.85	-0.152557	0.122232	-1.24809	0.211997	0.39032	1046.24	1163.45	914.621	1126.29	1097.82	1092.54	1298.35	1099.46
ANKS1B	175.393	-0.040687	0.161574	-0.251817	0.801183	0.895389	172.878	177.909	160.218	182.641	175.774	170.123	179.43	184.174
ANKS3	306.128	-0.717726	0.177302	-4.04805	5.16e-05	0.000567847	231.405	380.85	184.622	255.698	253.896	315.942	441.518	385.09
ANKS6	936.943	-0.318629	0.116516	-2.73465	0.00624467	0.028415	833.799	1040.09	743.792	876.678	880.926	953.349	1126.98	1039.93
ANKZF1	2283.21	-0.00721291	0.104701	-0.0688904	0.945077	0.97316	2277.52	2288.89	2065.85	2242.14	2524.57	2201.65	2435.41	2229.62
ANLN	4039.53	0.0583801	0.0913124	0.639345	0.522599	0.697923	4121.27	3957.78	4463.82	4015.5	3884.51	4143.7	3828.51	3901.13
ANO1	72.037	0.0603072	0.25358	0.237823	0.812018	0.901204	73.6534	70.4205	84.8836	60.0107	76.066	66.2815	82.6586	62.3214
ANO10	648.104	-0.000114338	0.111949	-0.00102133	0.999185	0.999688	647.798	648.409	654.665	651.42	637.31	699.27	656.229	589.728
ANO2	19.5477	-0.23409	0.430601	-0.543635	0.586693	0.7487	17.9893	21.106	19.0988	17.3944	17.4746	20.9891	18.1446	24.1844
ANO4	24.5201	-0.410605	0.418366	-0.981451	0.326371	0.52336	21.0976	27.9426	26.5261	18.2641	18.5025	23.1985	38.3052	22.3241
ANO6	1725.66	0.167049	0.104443	1.59943	0.109726	0.245221	1824.99	1626.33	1652.05	1994.27	1828.67	1711.17	1537.25	1630.59
ANO7	23.2403	-0.533234	0.411322	-1.29639	0.194841	0.368616	19.0368	27.4437	15.9157	16.5247	24.6701	26.5126	24.1928	31.6258
ANO8	453.37	-0.705348	0.172973	-4.0778	4.55e-05	0.000512826	344.507	562.234	266.322	376.589	390.609	504.844	669.333	512.524
ANO9	210.976	-0.591841	0.190176	-3.11207	0.00185782	0.0108977	168.121	253.831	133.692	188.729	181.942	226.462	303.418	231.612
ANOS1	56.7205	0.255365	0.273544	0.933544	0.350539	0.548056	61.6724	51.7686	53.0522	60.0107	71.9543	54.1299	57.4578	43.718
ANP32A	4720.9	0.0911314	0.092168	0.988753	0.322784	0.519218	4870.46	4571.33	5259.6	4618.21	4733.57	4426.5	4428.28	4859.21
ANP32A-IT1	33.9795	-0.306387	0.3892	-0.787223	0.431151	0.62152	30.2233	37.7358	29.7093	43.486	17.4746	45.2924	36.2891	31.6258
ANP32B	11845.7	0.216383	0.118223	1.83029	0.0672069	0.173477	12732.7	10958.7	14625.4	11729.9	11842.7	11281.1	9706.34	11888.5
ANP32E	6157.32	0.190988	0.104409	1.82923	0.0673646	0.173653	6564.45	5750.2	7454.9	6249.81	5988.66	5974.17	5502.85	5773.57
ANPEP	7.35892	-0.0389636	0.74994	-0.0519557	0.958564	0.979194	7.26832	7.44952	9.5494	6.08804	6.16751	5.52346	13.1044	3.72068
ANTXR1	539.369	-0.238395	0.108111	-2.20508	0.0274482	0.0888104	494.835	583.903	493.386	501.828	489.289	597.638	562.482	591.588
ANXA1	17.4749	1.24323	0.505643	2.45872	0.0139433	0.0533565	24.6515	10.2982	28.6482	16.5247	28.7817	6.62815	13.1044	11.162
ANXA11	1930.08	-0.281569	0.101026	-2.7871	0.00531822	0.0249604	1742.46	2117.7	1753.91	1711.61	1761.85	1977.4	2362.83	2012.89
ANXA2	4274.03	0.347272	0.0991204	3.50354	0.00045912	0.0034846	4786.36	3761.7	5340.24	4363.38	4655.44	3787.99	3660.16	3836.95
ANXA2P2	28.03	0.839734	0.409971	2.04828	0.0405326	0.119194	35.9678	20.0923	37.1366	23.4824	47.2843	24.3032	20.1606	15.8129
ANXA2R	50.4799	0.610999	0.295129	2.07028	0.0384261	0.114695	60.9888	39.971	45.6249	64.3593	72.9822	38.6642	40.3213	40.9275
ANXA3	157.012	0.158863	0.198355	0.800903	0.423188	0.614664	165.874	148.15	196.293	134.807	166.523	154.657	127.012	162.78
ANXA4	1315.94	0.108388	0.092629	1.17013	0.24195	0.427516	1365.24	1266.64	1378.3	1324.58	1392.83	1330.05	1268.1	1201.78
ANXA5	5717.26	0.241224	0.10743	2.24539	0.0247428	0.0820058	6194.39	5240.12	7080.35	5614.91	5887.92	5469.33	4992.78	5258.25
ANXA6	8381.05	-0.170976	0.0860449	-1.98706	0.0469157	0.132847	7885.19	8876.91	7493.1	7812.69	8349.79	8377.98	9236.6	9016.14
ANXA7	3641.62	0.102996	0.0802003	1.28424	0.199059	0.374406	3771.8	3511.44	3913.13	3683.26	3719.01	3421.23	3625.89	3487.21
ANXA9	2607.78	-0.301754	0.0902698	-3.3428	0.000829369	0.00566577	2336.12	2879.44	2220.77	2285.62	2501.95	2813.65	3009.98	2814.69
AOC2	20.965	-0.136722	0.430901	-0.317294	0.751021	0.865014	19.9703	21.9597	16.9767	18.2641	24.6701	20.9891	27.2169	17.6732
AOC3	18.0771	-0.830865	0.496278	-1.67419	0.0940929	0.219677	13.1288	23.0255	18.0378	6.95776	14.3909	17.6751	27.2169	24.1844
AOX1	379.062	0.880543	0.148188	5.94207	2.81e-09	1.04e-07	491.517	266.606	511.424	486.173	476.954	260.707	223.783	315.328
AOX2P	4.93142	-0.285255	0.873389	-0.326607	0.743965	NA	4.39717	5.46567	2.12209	6.95776	4.11168	6.62815	6.04819	3.72068
AP1AR	1808.45	0.293225	0.114122	2.5694	0.0101876	0.0418311	1991.77	1625.14	2293.98	1840.33	1841	1708.96	1555.39	1611.05
AP1B1	2243.95	-0.670511	0.168188	-3.98667	6.7e-05	0.000706058	1731.46	2756.44	1222.32	1897.73	2074.34	2560.68	3061.39	2647.26
AP1G1	5389.26	0.0985513	0.0745845	1.32134	0.186389	0.357286	5573.14	5205.38	5634.15	5587.95	5497.31	5336.77	5094.59	5184.77
AP1G2	1894.34	-0.307153	0.117117	-2.62262	0.00872557	0.0371855	1693.23	2095.46	1443.02	1752.49	1884.18	2054.73	2231.78	1999.87
AP1M1	818.669	-0.229619	0.164782	-1.39347	0.163479	0.325979	753.319	884.019	560.232	855.804	843.921	876.021	991.903	784.133
AP1M2	3425.56	-0.29616	0.0968398	-3.05825	0.00222637	0.0126207	3075.24	3775.87	2812.83	3081.42	3331.49	3564.84	3932.33	3830.44
AP1S1	4653.85	-0.114626	0.0852887	-1.34397	0.178958	0.346984	4469.02	4838.67	4163.54	4563.42	4680.11	4693.84	4871.82	4950.36
AP1S2	192.443	0.0526517	0.164466	0.320137	0.748864	0.863473	196.149	188.737	213.27	192.208	182.97	165.704	199.59	200.917
AP1S3	335.717	0.0263708	0.13193	0.199886	0.84157	0.919277	338.533	332.901	320.436	371.37	323.794	341.35	321.562	335.791
AP2A1	1530.57	-0.686464	0.183153	-3.74803	0.000178229	0.00159533	1172.92	1888.22	849.897	1342.85	1326.02	1601.8	2346.7	1716.16
AP2A2	813.197	-0.405589	0.119809	-3.3853	0.000711009	0.00500026	699.59	926.805	647.237	722.737	728.794	839.566	1042.3	898.544
AP2B1	3798.01	-0.0146754	0.0811176	-0.180915	0.856435	0.928846	3778.25	3817.76	3639.38	3942.44	3752.93	3938.23	3759.96	3755.1
AP2M1	11146.4	-0.222144	0.105117	-2.1133	0.0345754	0.105889	10290	12002.8	9089.97	10288.8	11491.1	11340.8	12627.6	12040.1
AP2S1	2631.11	-0.0688119	0.0935404	-0.735639	0.461951	0.648234	2568.87	2693.35	2623.96	2426.52	2656.14	2486.66	2833.58	2759.81
AP3B1	2065.53	0.112714	0.0964562	1.16855	0.242583	0.428343	2146.05	1985.01	2278.06	2141.25	2018.83	2121.01	1864.86	1969.17
AP3B2	109.187	-0.236358	0.200986	-1.17599	0.2396	0.42462	100.437	117.937	108.227	91.3206	101.764	104.946	127.012	121.852
AP3D1	2185.71	-0.550532	0.140455	-3.91965	8.87e-05	0.00088685	1773.28	2598.14	1405.88	2019.49	1894.45	2441.37	2901.12	2451.93
AP3M1	2005.98	0.0605646	0.0955388	0.633927	0.526128	0.701008	2047.71	1964.26	1880.17	2157.77	2105.18	2044.79	1876.96	1971.03
AP3M2	910.681	0.340343	0.116834	2.91303	0.00357937	0.0183109	1017.58	803.785	1067.41	981.044	1004.28	884.858	699.574	826.921
AP3S1	1856.8	0.184045	0.11437	1.60921	0.107571	0.241424	1975.2	1738.4	2238.8	1838.59	1848.2	1873.56	1595.71	1745.93
AP3S2	9.98022	0.854609	0.623213	1.3713	0.170283	0.334685	12.8541	7.10635	16.9767	11.3064	10.2792	8.83754	5.04016	7.44136
AP4B1	2090.29	0.204638	0.0893037	2.29149	0.0219353	0.0751066	2238.55	1942.03	2383.11	2136.9	2195.63	1969.67	1877.96	1978.47
AP4B1-AS1	207.117	-0.217695	0.154717	-1.40705	0.159413	0.32079	191.472	222.763	199.476	187.859	187.081	244.137	204.63	219.52
AP4E1	3732.44	0.108347	0.0793453	1.36551	0.172092	0.336958	3872.24	3592.63	3920.56	3960.7	3735.46	3700.72	3558.35	3518.83
AP4M1	633.157	-0.333286	0.129187	-2.57987	0.00988372	0.0409736	560.246	706.067	495.508	581.843	603.388	650.664	791.305	676.234
AP4S1	211.25	-0.216076	0.154814	-1.39571	0.162801	0.32512	195.356	227.144	207.965	204.384	173.718	237.509	219.751	224.171
AP5B1	1192.03	0.278204	0.121943	2.28143	0.022523	0.076394	1306.61	1077.46	1149.11	1325.45	1445.25	993.118	1196.53	1042.72
AP5M1	1181.96	0.104498	0.0922248	1.13308	0.257182	0.444958	1224.52	1139.41	1234	1235.87	1203.69	1199.7	1108.84	1109.69
AP5S1	470.029	-0.380104	0.161672	-2.35108	0.0187189	0.0666368	408.342	531.715	344.84	416.596	463.591	500.426	637.076	457.644
AP5Z1	583.231	-0.72084	0.176852	-4.07595	4.58e-05	0.000516162	440.228	726.234	346.962	495.74	477.982	655.082	903.197	620.423
APAF1	620.757	-0.0852928	0.115054	-0.741329	0.458494	0.645	602.142	639.372	618.589	618.371	569.467	701.479	601.795	614.842
APBA1	37.3523	-0.136632	0.338427	-0.403725	0.686415	0.821485	35.4835	39.2211	28.6482	46.9649	30.8376	38.6642	35.2811	43.718
APBA2	94.92	-0.669093	0.299713	-2.23244	0.0255857	0.0840991	73.2444	116.596	45.6249	82.6234	91.4848	82.8519	156.245	110.69
APBA3	81.1745	-1.23168	0.29641	-4.15531	3.25e-05	0.000383419	48.2927	114.056	28.6482	61.7501	54.4797	99.4223	144.149	98.598
APBB1	17.4056	-0.15824	0.511022	-0.309655	0.756823	0.868707	16.3722	18.439	10.6104	20.0036	18.5025	19.8845	25.2008	10.2319
APBB2	2506.61	0.29087	0.0890666	3.26576	0.00109171	0.00707936	2758.19	2255.03	2586.83	2948.35	2739.4	2216.01	2259	2290.08
APBB3	479.94	-0.375163	0.153396	-2.44571	0.0144569	0.0549695	417.63	542.25	345.901	455.733	451.256	516.996	626.996	482.758
APC	1537.29	-0.0398592	0.0999764	-0.398686	0.690124	0.824103	1515.58	1559	1457.88	1644.64	1444.23	1645.99	1475.76	1555.24
APC2	66.7333	-1.16831	0.334021	-3.4977	0.000469281	0.00354094	41.0516	92.415	31.8313	46.0952	45.2284	61.8628	139.108	76.2739
APCDD1	21.3567	-0.0376336	0.504766	-0.0745565	0.940568	0.971385	21.1017	21.6116	24.404	23.4824	15.4188	9.94223	36.2891	18.6034
APCDD1L	7.83372	-0.511411	0.814558	-0.627839	0.53011	0.704274	6.50654	9.1609	14.8546	2.60916	2.05584	11.0469	8.06426	8.37153
APCDD1L-AS1	15.0001	0.703919	0.52758	1.33424	0.182125	0.351806	18.5973	11.4029	11.6715	17.3944	26.7259	9.94223	13.1044	11.162
APEH	3137.69	-0.513776	0.136106	-3.77483	0.000160115	0.00145756	2584.72	3690.66	2055.24	2621.34	3077.59	3544.96	3866.81	3660.22
APEX1	5835.53	-0.0833345	0.08031	-1.03766	0.299428	0.492783	5667.46	6003.59	5645.82	5469.67	5886.89	5753.24	6066.34	6191.21
APEX2	1257.77	-0.0531166	0.127422	-0.416856	0.676783	0.815366	1234.51	1281.03	1031.34	1268.05	1404.14	1220.68	1375.96	1246.43
APH1A	9998.63	0.160483	0.0813795	1.97203	0.0486058	0.136582	10554.5	9442.72	10374.9	10174.9	11113.9	9025.33	9741.62	9561.22
APH1B	308.252	0.0340262	0.134874	0.252282	0.800823	0.895069	311.822	304.682	326.802	327.015	281.65	306	297.369	310.677
API5	5810.16	0.221603	0.095978	2.30889	0.0209494	0.0724662	6255.62	5364.71	6919.07	6029.77	5818.02	5588.64	5156.08	5349.41
APIP	1136.3	0.17082	0.117268	1.45666	0.145209	0.299666	1203.78	1068.83	1380.42	1088.89	1142.02	1106.9	1014.08	1085.51
APITD1	64.646	0.168543	0.297785	0.565989	0.571401	0.736911	68.6218	60.6702	90.1888	59.1409	56.5355	43.083	64.514	74.4136
APLF	7.71353	0.663933	0.741929	0.894874	0.370854	0.566706	9.43794	5.98913	5.30522	14.7852	8.22335	3.31408	9.07229	5.58102
APLN	2.83467	-1.76286	1.18848	-1.48329	0.137997	NA	1.27613	4.3932	1.06104	1.73944	1.02792	4.41877	5.04016	3.72068
APLP1	710.433	-0.332474	0.131567	-2.52704	0.0115029	0.0459554	628.901	791.965	543.255	621.85	721.599	756.714	863.883	755.298
APLP2	7522.84	0.0369192	0.0738912	0.499643	0.617326	0.772454	7619.13	7426.55	7852.79	7566.56	7438.02	7511.91	7350.57	7417.18
APMAP	3532.42	-0.189567	0.0771457	-2.45726	0.0140003	0.0535351	3300.92	3763.92	3312.58	3214.48	3375.69	3709.56	3798.26	3783.93
APOA1	15.7795	-1.035	0.502863	-2.05822	0.0395692	0.117093	10.3035	21.2555	7.42731	12.1761	11.3071	19.8845	26.2088	17.6732
APOA1-AS	3.41682	0.572113	1.12138	0.510188	0.60992	NA	4.09455	2.7391	8.48836	1.73944	2.05584	4.41877	1.00803	2.79051
APOA1BP	2856.79	-0.13045	0.0846586	-1.5409	0.123342	0.266702	2728.07	2985.52	2788.43	2558.72	2837.06	3004.76	2957.57	2994.22
APOBEC2	9.46257	0.268798	0.716736	0.37503	0.707638	0.83533	10.2814	8.64371	5.30522	12.1761	13.3629	15.4657	3.0241	7.44136
APOBEC3A	16.5858	-0.454566	0.522659	-0.869717	0.384455	0.57967	13.9254	19.2462	8.48836	14.7852	18.5025	25.4079	21.1687	11.162
APOBEC3B	138.551	0.785898	0.22128	3.5516	0.000382899	0.00301368	175.528	101.574	166.584	151.331	208.668	81.7472	129.028	93.9472
APOBEC3D	8.01581	-0.390709	0.67054	-0.582679	0.560109	0.728522	6.96737	9.06424	8.48836	5.21832	7.19543	7.73284	11.0884	8.37153
APOBEC3F	261.399	2.25241	0.169425	13.2944	2.49e-40	3e-38	432.033	90.7655	438.212	426.163	431.726	85.0613	111.892	75.3438
APOBEC3H	25.299	1.09447	0.427679	2.55909	0.0104946	0.0427863	34.5249	16.073	40.3197	25.2219	38.033	17.6751	10.0803	20.4637
APOBR	13.7796	-0.378397	0.539992	-0.700745	0.483462	0.665586	12.0346	15.5245	11.6715	6.95776	17.4746	16.5704	15.1205	14.8827
APOC1	62.0866	0.0881667	0.279294	0.315677	0.752248	0.8658	64.0631	60.1102	70.029	57.4015	64.7589	48.6065	79.6345	52.0895
APOD	10.4805	1.78865	0.651855	2.74393	0.00607076	0.027762	16.2515	4.70953	11.6715	16.5247	20.5584	5.52346	3.0241	5.58102
APOE	93.2791	-1.02873	0.284995	-3.60966	0.0003066	0.0025046	61.2429	125.315	37.1366	75.6656	70.9264	93.8988	147.173	134.875
APOL1	1261.77	5.49582	0.151986	36.16	2.59e-286	1.3e-283	2469.15	54.4029	2431.91	2376.94	2598.58	49.7111	48.3855	65.1119
APOL2	2585.74	3.40339	0.0909367	37.4259	1.48e-306	8.84e-304	4724.9	446.569	4630.4	4627.78	4916.54	445.191	453.614	440.901
APOL3	599.931	6.7407	0.273104	24.6818	1.68e-134	4.2e-132	1188.62	11.2414	1215.96	1174.99	1174.91	13.2563	12.0964	8.37153
APOL4	44.7768	0.237178	0.292126	0.811903	0.416847	0.608729	48.4654	41.0882	47.747	45.2254	52.4239	44.1877	36.2891	42.7878
APOL6	1217.87	6.24389	0.179304	34.823	1.09e-265	4.84e-263	2403.6	32.1346	2424.49	2439.56	2346.74	41.9783	30.241	24.1844
APOLD1	75.3029	0.372794	0.246938	1.50967	0.131128	0.278947	85.0713	65.5346	75.3342	90.4509	89.4289	53.0252	64.514	79.0644
APOM	63.5005	0.297726	0.27791	1.0713	0.284033	0.475053	70.2466	56.7544	81.7005	59.1409	69.8985	45.2924	52.4177	72.5533
APOO	571.83	0.122118	0.131957	0.925439	0.354737	0.551858	596.307	547.353	683.313	550.533	555.076	552.346	499.984	589.728
APOOL	1028.5	-0.0913344	0.0956401	-0.954981	0.339587	0.536844	996.01	1060.98	1031.34	1014.09	942.602	1037.31	1056.42	1089.23
APOPT1	739.898	-0.0416977	0.127015	-0.32829	0.742692	0.859478	729.46	750.337	853.08	672.293	663.008	767.761	717.719	765.53
APP	10549	0.192065	0.0755704	2.54154	0.0110365	0.044571	11250.4	9847.63	11256.6	11219.4	11275.2	9705.82	9528.93	10308.1
APPBP2	15680	0.0993415	0.0769796	1.29049	0.19688	0.371342	16219.4	15140.6	16661.6	16389.9	15606.9	15754	14741.5	14926.4
APPL1	1692.56	0.0610482	0.0881878	0.692253	0.488779	0.669757	1728.08	1657.04	1747.54	1795.1	1641.59	1697.91	1649.14	1624.08
APPL2	1901.31	-0.153804	0.0930951	-1.65212	0.0985107	0.226749	1800.02	2002.6	1799.53	1775.97	1824.56	2119.9	1839.66	2048.23
APRT	1853.65	-0.740406	0.14431	-5.13065	2.89e-07	6.82e-06	1388.07	2319.23	1156.54	1429.82	1577.86	2055.83	2743.86	2157.99
APTR	136.755	0.140673	0.191789	0.733477	0.463268	0.649244	143.588	129.922	164.462	129.588	136.713	117.097	146.165	126.503
APTX	616.387	0.166039	0.13571	1.22349	0.221146	0.401786	652.101	580.674	776.685	573.145	606.472	588.801	575.586	577.636
AQP11	78.5087	-0.183457	0.232073	-0.790513	0.429228	0.619841	73.4456	83.5719	70.029	83.4931	66.8147	83.9566	75.6024	91.1567
AQP3	361.614	0.176129	0.131999	1.33432	0.1821	0.351803	383.949	339.28	391.526	352.237	408.084	313.733	360.875	343.233
AQP4-AS1	4.56898	0.177754	0.92001	0.193209	0.846795	NA	4.86736	4.27059	4.24418	5.21832	5.13959	1.10469	7.05622	4.65085
AQP6	11.7365	-0.382685	0.577866	-0.662238	0.507819	0.685668	10.1453	13.3277	7.42731	14.7852	8.22335	12.1516	11.0884	16.7431
AQP7	3.80137	-0.905723	1.01079	-0.896051	0.370225	NA	2.67982	4.92292	4.24418	1.73944	2.05584	2.20938	6.04819	6.51119
AQP7P1	10.9657	-0.572419	0.57546	-0.994717	0.319874	0.515552	8.82332	13.108	9.5494	8.6972	8.22335	14.361	10.0803	14.8827
AQP7P3	2.96061	-1.85108	1.17827	-1.57101	0.116179	NA	1.27613	4.64509	1.06104	1.73944	1.02792	3.31408	5.04016	5.58102
AQR	1447.04	-0.0146469	0.0909122	-0.16111	0.872007	0.935666	1439.31	1454.76	1422.86	1506.35	1388.72	1514.53	1429.39	1420.37
AR	2255.74	-0.0363605	0.088726	-0.409806	0.681948	0.818309	2226.97	2284.51	2200.61	2302.15	2178.16	2419.28	2157.19	2277.06
ARAF	841.154	-0.253241	0.139452	-1.81597	0.0693756	0.177102	767.423	914.884	631.322	799.273	871.675	838.461	1015.09	891.103
ARAP1	967.938	-0.642861	0.147051	-4.3717	1.23e-05	0.000170541	755.438	1180.44	614.345	847.107	804.86	1111.32	1365.88	1064.11
ARAP2	600.351	0.497919	0.121073	4.11256	3.91e-05	0.000448878	702.49	498.212	652.543	777.53	677.399	535.776	479.823	479.038
ARAP3	34.976	-0.135725	0.375929	-0.361038	0.718071	0.842162	33.4172	36.5348	27.5872	24.3522	48.3122	29.8267	45.3614	34.4163
ARC	53.618	-0.572292	0.297818	-1.92161	0.0546545	0.14898	43.0307	64.2053	37.1366	53.9226	38.033	50.8158	77.6185	64.1817
ARCN1	6346.01	0.0189813	0.0738199	0.25713	0.797079	0.893181	6387.5	6304.53	6227.27	6522.03	6413.19	6385.12	6286.09	6242.37
AREG	126.844	-0.0863568	0.194555	-0.443868	0.657138	0.801906	123.043	130.645	125.203	111.324	132.602	139.191	141.124	111.62
AREL1	2965.39	0.0898434	0.102695	0.874853	0.381654	0.577307	3057.57	2873.2	2705.66	3241.45	3225.61	2710.91	2965.63	2943.06
ARF1	4579.6	-0.319754	0.117831	-2.71366	0.00665437	0.0299283	4073.93	5085.28	3437.79	4332.07	4451.92	4809.83	5530.06	4915.95
ARF3	13892.9	0.132234	0.0865783	1.52733	0.126678	0.27221	14529	13256.8	13286.4	15096.6	15203.9	12947	13307	13516.3
ARF4	2908.98	0.35597	0.0828775	4.29513	1.75e-05	0.00022829	3266.3	2551.66	3432.48	3133.6	3232.8	2568.41	2510	2576.57
ARF5	3320.11	-0.359499	0.0943876	-3.80876	0.000139668	0.00130354	2908.63	3731.59	2783.12	2874.42	3068.34	3544.96	4059.34	3590.46
ARF6	4799.67	0.279627	0.0928807	3.0106	0.0026073	0.0142643	5263.63	4335.72	5790.12	4893.04	5107.73	4429.82	4290.18	4287.15
ARFGAP1	1800.45	-0.807082	0.165395	-4.87971	1.06e-06	2.11e-05	1309.27	2291.63	1028.15	1492.44	1407.22	2035.95	2832.57	2006.38
ARFGAP2	3576.28	-0.0991791	0.105388	-0.941085	0.346661	0.543927	3453.51	3699.05	3119.47	3411.04	3830.03	3444.43	3940.4	3712.31
ARFGAP3	678.221	0.155535	0.10079	1.54316	0.122791	0.265771	714.747	641.695	718.327	705.343	720.571	642.931	655.221	626.935
ARFGEF1	2606.61	-0.0282079	0.0901615	-0.31286	0.754387	0.86714	2580.76	2632.47	2627.15	2705.7	2409.44	2758.42	2550.32	2588.66
ARFGEF2	4144.76	-0.0271918	0.0934807	-0.290881	0.771142	0.877614	4105.07	4184.44	3812.33	4470.36	4032.53	4358.01	4173.25	4022.06
ARFGEF3	4607.03	-0.143124	0.110276	-1.29787	0.194332	0.367877	4378.23	4835.84	3739.12	4874.78	4520.79	4784.42	4997.82	4725.26
ARFIP1	1281.04	0.342059	0.117499	2.91118	0.0036007	0.0183958	1432.31	1129.78	1628.7	1380.25	1287.98	1184.23	1043.31	1161.78
ARFIP2	1997.77	-0.145148	0.110166	-1.31754	0.187656	0.358942	1897.3	2098.24	1665.84	1968.18	2057.89	1947.57	2221.7	2125.44
ARFRP1	452.004	-0.647508	0.1786	-3.62547	0.000288438	0.00238001	352.032	551.976	272.689	383.546	399.86	509.263	671.349	475.317
ARG1	9.82721	0.939331	0.621711	1.51088	0.130819	0.278447	12.9485	6.7059	15.9157	9.56692	13.3629	6.62815	6.04819	7.44136
ARG2	419.837	-0.0977751	0.13642	-0.716721	0.473546	0.658126	405.724	433.95	435.028	356.585	425.558	479.436	411.277	411.135
ARGFXP2	16.5403	0.273718	0.483701	0.565883	0.571473	0.736942	18.1185	14.9621	13.7936	20.0036	20.5584	13.2563	12.0964	19.5336
ARGLU1	1565.21	0.251546	0.103091	2.44004	0.0146856	0.055567	1701.48	1428.94	1893.96	1654.21	1556.27	1425.05	1440.48	1421.3
ARHGAP1	1951.99	-0.180038	0.15431	-1.16673	0.243319	0.429056	1830.21	2073.76	1370.87	1922.08	2197.69	1949.78	2253.96	2017.54
ARHGAP10	772.012	0.0411754	0.103603	0.397433	0.691048	0.824673	782.835	761.189	785.173	808.839	754.492	798.692	714.695	770.181
ARHGAP11A	2258.77	-0.147091	0.0843877	-1.74304	0.0813267	0.197828	2143.72	2373.82	2216.52	2180.39	2034.25	2360.73	2349.72	2411
ARHGAP11B	117.133	0.407952	0.190547	2.14096	0.0322777	0.100518	133.625	100.64	131.57	135.676	133.629	99.4223	92.7389	109.76
ARHGAP12	1805.43	0.331603	0.0926365	3.57961	0.000344105	0.00276156	2012.06	1598.8	2133.76	1936	1966.41	1678.03	1523.14	1595.24
ARHGAP17	939.445	0.00751557	0.0963079	0.0780368	0.937799	0.970041	942.066	936.824	943.269	905.378	977.551	919.104	967.711	923.659
ARHGAP18	320.086	0.760379	0.133321	5.70337	1.17e-08	3.9e-07	402.451	237.721	404.258	382.677	420.419	251.87	239.912	221.38
ARHGAP19	1263.5	0.140419	0.097983	1.4331	0.15183	0.309666	1325.34	1201.66	1348.59	1254.14	1373.3	1173.18	1148.15	1283.63
ARHGAP21	2404.61	0.150006	0.106753	1.40517	0.159971	0.321455	2529.04	2280.19	2211.22	2809.2	2566.71	2301.07	2303.35	2236.13
ARHGAP23	2.62074	-0.442772	1.15379	-0.383753	0.701161	NA	2.19859	3.04289	1.06104	3.47888	2.05584	3.31408	3.0241	2.79051
ARHGAP24	22.916	-0.190468	0.479653	-0.397096	0.691297	0.824784	21.4052	24.4268	30.7703	25.2219	8.22335	23.1985	22.1767	27.9051
ARHGAP26	198.477	-0.059619	0.162646	-0.366556	0.71395	0.839232	194.361	202.593	211.148	204.384	167.551	202.159	193.542	212.079
ARHGAP27	767.87	0.531272	0.155674	3.41273	0.000643153	0.0046108	907.593	628.147	713.022	920.164	1089.59	600.952	696.55	586.937
ARHGAP28	7.4296	-0.501708	0.724948	-0.692061	0.488899	0.669804	6.1435	8.7157	5.30522	6.95776	6.16751	5.52346	14.1124	6.51119
ARHGAP29	874.034	0.171176	0.109941	1.55699	0.119473	0.260809	925.742	822.326	914.621	943.646	918.959	869.393	728.807	868.779
ARHGAP30	125.055	-0.293124	0.1866	-1.57087	0.116214	0.255634	112.411	137.699	103.982	107.845	125.406	139.191	138.1	135.805
ARHGAP31	34.7027	0.239762	0.352096	0.680956	0.4959	0.675465	37.4977	31.9076	29.7093	47.8346	34.9492	34.2455	25.2008	36.2766
ARHGAP32	1364.1	0.00973887	0.0968157	0.100592	0.919874	0.96034	1368.32	1359.87	1290.23	1484.61	1330.13	1349.93	1380	1349.68
ARHGAP33	602.566	-1.22291	0.198653	-6.15598	7.46e-10	2.95e-08	361.291	843.84	268.444	393.983	421.447	698.165	1095.73	737.625
ARHGAP35	5172.52	-0.333425	0.0997942	-3.34113	0.000834382	0.00569501	4576.99	5768.05	4058.5	5013.93	4658.53	5635.03	5962.51	5706.59
ARHGAP36	2.4006	0.120231	1.24119	0.0968673	0.922832	NA	2.48849	2.3127	1.06104	4.3486	2.05584	2.20938	1.00803	3.72068
ARHGAP39	349.488	-0.831472	0.177932	-4.67299	2.97e-06	5.21e-05	251.212	447.764	190.988	286.138	276.51	409.841	524.177	409.275
ARHGAP4	203.556	-0.693202	0.225735	-3.07087	0.00213435	0.0121881	155.611	251.502	129.447	151.331	186.053	194.426	338.699	221.38
ARHGAP40	4.08429	0.214339	1.04718	0.204682	0.837821	NA	4.39549	3.77309	9.5494	2.60916	1.02792	4.41877	5.04016	1.86034
ARHGAP42	26.1393	0.293913	0.375386	0.782962	0.433649	0.623384	28.7561	23.5226	25.4651	33.0494	27.7538	23.1985	23.1847	24.1844
ARHGAP44	262.401	-0.00596508	0.141239	-0.042234	0.966312	0.983099	261.813	262.989	247.223	267.874	270.343	250.765	284.265	253.936
ARHGAP5	2193.93	0.172301	0.0969681	1.77688	0.0755877	0.188284	2324.41	2063.44	2365.07	2452.61	2155.55	2200.55	1942.48	2047.3
ARHGAP5-AS1	59.3307	0.430807	0.263927	1.6323	0.102617	0.233502	68.1533	50.5082	80.6394	65.229	58.5914	50.8158	51.4096	49.299
ARHGAP8	18.564	0.0569228	0.469002	0.12137	0.903398	0.952075	18.9355	18.1924	13.7936	23.4824	19.5305	13.2563	17.1365	24.1844
ARHGDIA	2631.25	-0.728241	0.164218	-4.43459	9.22e-06	0.00013419	1980.66	3281.84	1516.23	2217.79	2207.97	2842.37	3984.75	3018.4
ARHGDIB	23.7002	-0.114474	0.474841	-0.241079	0.809494	0.899753	22.6761	24.7243	21.2209	36.5282	10.2792	20.9891	26.2088	26.9749
ARHGDIG	358.239	-0.748423	0.208483	-3.58985	0.000330865	0.00267466	267.157	449.322	211.148	303.532	286.789	383.328	602.803	361.836
ARHGEF1	690.826	-0.935854	0.205272	-4.5591	5.14e-06	8.21e-05	474.096	907.555	314.069	541.835	566.383	767.761	1115.89	839.013
ARHGEF10	799.444	-0.310928	0.115918	-2.68231	0.0073116	0.032313	713.241	885.647	647.237	791.445	701.041	859.45	944.526	852.966
ARHGEF10L	434.581	-0.896262	0.195142	-4.59287	4.37e-06	7.18e-05	303.526	565.637	205.843	347.018	357.716	516.996	656.229	523.686
ARHGEF11	2168.99	-0.17882	0.161502	-1.10723	0.268194	0.457304	2034.5	2303.48	1441.96	2300.41	2361.13	2206.07	2366.86	2337.52
ARHGEF12	4629.7	-0.0388964	0.0890461	-0.436812	0.662247	0.805165	4566.76	4692.64	4361.96	4940.88	4397.44	4863.96	4536.14	4677.82
ARHGEF16	588.756	-0.909088	0.22897	-3.97034	7.18e-05	0.0007471	408.947	768.564	266.322	483.564	476.954	631.884	1029.2	644.608
ARHGEF17	1018.01	-0.674574	0.170779	-3.94997	7.82e-05	0.000797066	784.014	1252	559.171	852.325	940.546	1200.8	1397.13	1158.06
ARHGEF18	365.184	-0.434372	0.151037	-2.87593	0.00402843	0.0199883	310.509	419.858	258.895	320.057	352.576	397.689	464.703	397.183
ARHGEF19	553.353	-0.981412	0.169084	-5.80428	6.46e-09	2.22e-07	371.95	734.757	289.665	380.068	446.117	690.433	860.859	652.979
ARHGEF2	579.165	-0.144744	0.119911	-1.2071	0.227395	0.410014	550.236	608.095	506.118	556.621	587.97	553.451	641.108	629.725
ARHGEF25	293.607	-0.190912	0.14319	-1.33328	0.18244	0.352206	274.145	313.07	241.918	289.617	290.901	290.534	329.626	319.048
ARHGEF26	1844.83	0.0493867	0.0818237	0.603574	0.546127	0.717369	1876.39	1813.27	1874.87	1896.86	1857.45	1787.39	1837.64	1814.76
ARHGEF26-AS1	49.3728	-0.162511	0.336013	-0.483645	0.628638	0.780606	46.4869	52.2586	55.1743	45.2254	39.0609	76.2238	43.3454	37.2068
ARHGEF28	457.586	-0.3286	0.121955	-2.69444	0.00705064	0.0314012	405.565	509.607	402.136	427.032	387.525	486.065	554.418	488.339
ARHGEF3	131.039	0.164945	0.191409	0.861739	0.388831	0.583886	138.742	123.336	149.607	127.849	138.769	113.783	113.908	142.316
ARHGEF34P	82.7101	0.109098	0.244801	0.44566	0.655843	0.800892	85.6987	79.7214	64.7237	100.888	91.4848	83.9566	70.5622	84.6455
ARHGEF35	467.475	0.396892	0.111721	3.55254	0.000381528	0.00300441	531.402	403.548	540.072	522.702	531.434	406.527	403.213	400.903
ARHGEF37	237.608	0.284831	0.151399	1.88132	0.059928	0.159298	261.084	214.132	242.979	245.261	295.013	213.206	209.671	219.52
ARHGEF38	241.473	-0.102745	0.145285	-0.707198	0.479443	0.662929	232.667	250.279	232.369	248.74	216.891	265.126	242.936	242.774
ARHGEF39	328.759	-0.41572	0.139877	-2.97205	0.00295818	0.0157617	281.863	375.655	297.093	256.567	291.929	373.386	411.277	342.303
ARHGEF4	183.336	-0.526071	0.202519	-2.59764	0.00938675	0.0393868	150.105	216.566	114.593	166.116	169.607	199.949	259.064	190.685
ARHGEF40	390.407	-0.431794	0.165246	-2.61303	0.00897434	0.0380888	332.29	448.524	259.956	356.585	380.33	403.213	507.04	435.32
ARHGEF5	453.996	0.362862	0.11667	3.11016	0.00186983	0.0109474	510.879	397.112	502.935	527.05	502.652	375.595	397.165	418.576
ARHGEF6	121.341	-0.0112073	0.209405	-0.0535196	0.957318	0.978887	120.605	122.077	98.6772	135.676	127.462	141.401	116.932	107.9
ARHGEF7	1279.94	0.0365244	0.108827	0.33562	0.737157	0.855415	1295.92	1263.95	1217.02	1434.17	1236.59	1173.18	1339.67	1278.98
ARHGEF9	912.792	-0.157299	0.110941	-1.41786	0.156232	0.316274	862.791	962.793	769.257	945.385	873.731	932.36	973.759	982.26
ARID1A	3231.91	-0.251613	0.0965099	-2.60712	0.00913075	0.0385418	2950.52	3513.31	2678.08	3120.55	3052.92	3375.94	3718.63	3445.35
ARID1B	1433.09	-0.230424	0.115992	-1.98655	0.0469721	0.132942	1318.6	1547.57	1144.87	1437.65	1373.3	1457.09	1671.32	1514.32
ARID2	2573.18	-0.119643	0.0963289	-1.24203	0.214225	0.393522	2466	2680.36	2368.25	2723.09	2306.65	2741.85	2662.21	2637.03
ARID3A	231.02	-0.491746	0.168705	-2.91483	0.00355879	0.0182176	192.191	269.849	169.767	176.553	230.254	244.137	287.289	278.121
ARID3B	158.25	-0.058395	0.213067	-0.274069	0.784032	0.885788	154.948	161.551	111.41	181.771	171.662	139.191	173.381	172.081
ARID4A	1461.25	0.16153	0.0952543	1.69578	0.0899278	0.212705	1542.95	1379.55	1575.65	1563.76	1489.45	1421.74	1275.16	1441.76
ARID4B	1189.67	0.322379	0.112793	2.85814	0.00426136	0.0209239	1321.77	1057.56	1393.15	1371.55	1200.61	1159.93	961.662	1051.09
ARID5A	152.658	-0.475518	0.221312	-2.14863	0.0316639	0.0992037	127.655	177.66	92.3109	131.328	159.327	162.39	209.671	160.919
ARID5B	856.456	0.027848	0.0973878	0.28595	0.774916	0.879845	864.686	848.226	849.897	894.072	850.089	834.043	831.626	879.011
ARIH1	2074.51	0.0880451	0.0954198	0.922712	0.356157	0.553202	2137.85	2011.16	2313.08	2050.8	2049.67	2119.9	1931.39	1982.19
ARIH2	2464.4	0.0158126	0.0826009	0.191434	0.848186	0.923449	2478.2	2450.6	2562.42	2430.87	2441.31	2407.12	2407.18	2537.5
ARIH2OS	21.1911	0.181667	0.415696	0.43702	0.662097	0.805099	22.5226	19.8596	19.0988	21.743	26.7259	19.8845	20.1606	19.5336
ARL1	3780.88	0.267446	0.106337	2.51508	0.0119005	0.0472262	4130.61	3431.16	4739.69	3824.16	3827.97	3449.95	3459.57	3383.96
ARL11	15.2629	0.330589	0.526626	0.62775	0.530168	0.704274	16.9324	13.5935	13.7936	22.6127	14.3909	13.2563	19.1526	8.37153
ARL13A	3.41697	0.0646744	1.05465	0.0613233	0.951102	NA	3.47472	3.35922	2.12209	5.21832	3.08376	4.41877	1.00803	4.65085
ARL13B	426.714	0.120554	0.131349	0.917814	0.358716	0.555154	444.357	409.071	482.775	445.297	405	449.61	397.165	380.44
ARL14EP	691.285	0.27393	0.126087	2.17254	0.029815	0.0945756	756.772	625.797	868.996	733.174	668.147	632.989	648.165	596.239
ARL15	236.545	-0.151676	0.169966	-0.892391	0.372183	0.567879	224.22	248.87	271.627	202.645	198.388	271.754	234.871	239.984
ARL16	373.299	-0.0240222	0.134929	-0.178036	0.858695	0.930128	370.33	376.267	387.281	378.328	345.381	332.512	410.269	386.021
ARL17A	128.578	-0.00818454	0.19288	-0.0424333	0.966153	0.983099	128.061	129.095	126.264	130.458	127.462	139.191	141.124	106.97
ARL2	270.982	-0.828527	0.1869	-4.433	9.29e-06	0.000135057	195.188	346.776	186.744	203.514	195.305	294.953	449.582	295.794
ARL2BP	961.996	0.406252	0.11066	3.67118	0.000241431	0.00206006	1096.98	827.012	1215.96	996.699	1078.29	798.692	826.586	855.756
ARL3	1354.39	0.0035887	0.127212	0.0282103	0.977494	0.988334	1356.41	1352.36	1619.15	1206.3	1243.78	1379.76	1292.3	1385.02
ARL4A	973.068	0.17848	0.127294	1.4021	0.160884	0.322496	1033.48	912.655	1220.2	920.164	960.076	936.779	871.948	929.24
ARL4C	193.709	0.257923	0.15894	1.62277	0.104638	0.236575	211.169	176.249	228.125	195.687	209.695	164.599	186.486	177.662
ARL4D	26.499	-0.4476	0.382304	-1.1708	0.241681	0.427235	22.395	30.603	16.9767	23.4824	26.7259	32.0361	27.2169	32.5559
ARL5A	1335.34	0.0407388	0.105834	0.384932	0.700288	0.830998	1354.01	1316.66	1436.65	1310.67	1314.71	1457.09	1265.08	1227.82
ARL5B	962.537	0.142212	0.112177	1.26775	0.204887	0.381392	1009.47	915.603	975.1	1127.16	926.155	963.292	884.044	899.474
ARL6	59.94	0.420803	0.258273	1.6293	0.10325	0.234565	68.5324	51.3475	68.9679	73.9262	62.7031	57.444	46.3695	50.2292
ARL6IP1	9661.66	0.160542	0.0955275	1.68059	0.092843	0.217823	10199	9124.37	11328.8	9557.35	9710.75	9395.41	8734.6	9243.1
ARL6IP4	2378.52	-0.494933	0.106781	-4.63505	3.57e-06	6.08e-05	1974.19	2782.84	1732.69	2118.64	2071.26	2635.8	2945.47	2767.26
ARL6IP5	1691.01	0.0268908	0.095312	0.282134	0.77784	0.882132	1707.03	1674.99	1854.71	1601.15	1665.23	1708.96	1649.14	1666.86
ARL6IP6	827.267	0.513416	0.101936	5.03667	4.74e-07	1.06e-05	973.04	681.495	1032.4	929.731	956.992	701.479	660.261	682.745
ARL8A	947.424	-0.0392075	0.126449	-0.310065	0.756511	0.868679	934.404	960.445	807.455	991.481	1004.28	887.068	1071.54	922.729
ARL8B	3900.71	0.226735	0.105351	2.15218	0.0313834	0.0985237	4206.62	3594.8	4679.21	3961.57	3979.07	3909.51	3359.77	3515.11
ARMC1	1671.65	0.0917133	0.101976	0.89936	0.368461	0.564215	1724.96	1618.34	1870.62	1568.1	1736.16	1704.54	1589.67	1560.83
ARMC10	2584.1	0.221599	0.103687	2.1372	0.0325821	0.101222	2782.23	2385.97	3031.41	2639.6	2675.67	2576.14	2176.34	2405.42
ARMC12	16.7459	-0.108487	0.545083	-0.199029	0.84224	0.919572	16.0362	17.4556	13.7936	26.0916	8.22335	19.8845	11.0884	21.3939
ARMC2	68.9278	-0.234899	0.250497	-0.937732	0.348382	0.545635	63.3914	74.4643	76.3952	58.2712	55.5076	72.9097	81.6506	68.8326
ARMC3	5.97904	-0.801934	0.827711	-0.968857	0.332617	0.529763	4.37341	7.58466	7.42731	2.60916	3.08376	11.0469	7.05622	4.65085
ARMC5	236.804	-0.697657	0.204853	-3.40565	0.00066006	0.00471025	180.446	293.162	125.203	204.384	211.751	266.231	340.715	272.54
ARMC6	733.551	-0.846186	0.181839	-4.6535	3.26e-06	5.65e-05	524.236	942.866	401.075	566.188	605.444	804.216	1184.44	839.943
ARMC7	356.543	-0.333385	0.161526	-2.06397	0.0390203	0.1158	315.261	397.825	241.918	357.455	346.409	386.642	414.301	392.532
ARMC8	1768.37	0.374122	0.0984236	3.80114	0.000144029	0.00133064	1996.59	1540.15	2098.75	1908.17	1982.86	1592.97	1406.2	1621.29
ARMC9	702.318	-0.0903613	0.109196	-0.827515	0.407945	0.600846	680.174	724.461	688.618	682.73	669.175	784.331	666.309	722.742
ARMCX2	9.82762	-0.0922217	0.662224	-0.139261	0.889244	0.944395	9.51275	10.1425	7.42731	13.9155	7.19543	6.62815	7.05622	16.7431
ARMCX3	899.202	0.155908	0.104439	1.4928	0.135488	0.285373	947.938	850.465	991.016	963.65	889.15	792.064	871.948	887.382
ARMCX5	181.556	0.236696	0.17936	1.31967	0.186945	0.357998	196.402	166.71	212.209	187.859	189.137	191.112	135.076	173.942
ARMCX5-GPRASP2	8.37758	0.339107	0.848691	0.399564	0.689478	0.8235	9.3504	7.40477	9.5494	11.3064	7.19543	2.20938	18.1446	1.86034
ARMCX6	755.73	-0.0313947	0.1035	-0.30333	0.761638	0.871976	747.761	763.699	795.784	727.956	719.543	741.248	761.064	788.784
ARMT1	11888.9	-0.00488042	0.097347	-0.0501343	0.960015	0.980032	11868.9	11908.8	13218.5	11188.1	11200.2	12526.1	11403.9	11796.4
ARNT	3403.12	-0.0717512	0.089322	-0.803287	0.421809	0.613178	3318.33	3487.91	3077.03	3508.45	3369.52	3349.43	3545.25	3569.06
ARNT2	790.967	0.319589	0.100057	3.19407	0.00140281	0.0087304	878.134	703.799	840.347	874.068	919.987	714.736	704.614	692.046
ARNTL	308.886	-0.0352696	0.130402	-0.270469	0.786799	0.887009	305.208	312.563	306.642	291.356	317.627	319.256	299.385	319.048
ARNTL2	262.041	0.286397	0.155221	1.84509	0.0650243	0.169279	287.792	236.289	264.2	322.666	276.51	246.346	207.655	254.867
ARPC1A	6045.18	-0.320977	0.0757996	-4.23455	2.29e-05	0.000286655	5375.75	6714.62	5395.41	5327.03	5404.8	6475.71	6734.66	6933.49
ARPC1B	2164.89	-0.653739	0.150139	-4.35421	1.34e-05	0.000182461	1682.5	2647.28	1392.09	1824.67	1830.72	2193.92	3160.18	2587.73
ARPC2	5525.26	0.159021	0.0775494	2.05057	0.0403086	0.118693	5829.66	5220.86	6051.14	5644.48	5793.35	5302.52	5091.57	5268.48
ARPC3	7342.63	0.239583	0.100269	2.38939	0.0168762	0.0616462	7951.26	6734	8831.08	7336.96	7685.75	6925.31	6279.03	6997.67
ARPC4	3262.58	-0.0753011	0.0959632	-0.784687	0.432637	0.622678	3177.89	3347.28	3266.96	3122.29	3144.4	2999.24	3544.24	3498.37
ARPC5	4012.72	0.238684	0.0984636	2.42408	0.0153472	0.0574262	4344.12	3681.31	4856.4	4069.42	4106.54	3792.41	3587.59	3663.94
ARPC5L	1556.75	0.0943023	0.105543	0.893497	0.371591	0.567313	1607.95	1505.54	1752.85	1460.26	1610.75	1555.41	1403.18	1558.03
ARPIN	25.8436	0.114208	0.379465	0.300971	0.763437	0.873069	26.9181	24.7691	28.6482	24.3522	27.7538	24.3032	21.1687	28.8353
ARPP19	14249.1	-0.0438386	0.0773381	-0.566844	0.57082	0.736528	14032.4	14465.9	14056.7	14134.7	13905.7	15264.6	13885.6	14247.4
ARR3	14.1397	-0.476183	0.53209	-0.894929	0.370825	0.566706	11.753	16.5263	7.42731	16.5247	11.3071	15.4657	20.1606	13.9525
ARRB1	1448.54	-0.533189	0.103623	-5.14546	2.67e-07	6.38e-06	1183.55	1713.53	1050.43	1258.48	1241.73	1679.13	1762.04	1699.42
ARRB2	1529.48	-0.121567	0.0920023	-1.32135	0.186385	0.357286	1465.2	1593.76	1405.88	1488.96	1500.76	1518.95	1580.59	1681.75
ARRDC1	1183.48	-0.745597	0.188357	-3.95842	7.54e-05	0.000774992	884.053	1482.9	621.772	1027.14	1003.25	1247.2	1816.47	1385.02
ARRDC1-AS1	210.217	-0.451257	0.154233	-2.92582	0.00343549	0.0176889	177.596	242.838	172.95	186.12	173.718	220.938	261.08	246.495
ARRDC2	842.271	-0.114866	0.118728	-0.967473	0.333308	0.530483	808.737	875.806	703.473	825.364	897.373	848.404	861.867	917.148
ARRDC3	1386.58	0.627288	0.107797	5.81917	5.91e-09	2.05e-07	1683.68	1089.47	1845.16	1577.67	1628.22	1096.96	1005.01	1166.43
ARRDC3-AS1	74.6737	0.0176868	0.270619	0.0653567	0.94789	0.974118	75.0837	74.2637	67.9069	95.6692	61.6751	56.3393	83.6666	82.7851
ARRDC4	2120.87	0.364618	0.103531	3.52183	0.000428575	0.00329918	2387.25	1854.49	2469.05	2343.89	2348.79	2064.67	1667.28	1831.5
ARSA	233.272	-0.641548	0.162875	-3.9389	8.19e-05	0.00082876	182.118	284.426	159.157	193.948	193.249	261.812	323.578	267.889
ARSB	223.111	0.29074	0.166399	1.74725	0.0805944	0.196652	245.609	200.613	245.101	240.912	250.812	208.787	163.301	229.752
ARSD	1067.4	-0.131264	0.0933662	-1.4059	0.159753	0.321205	1018.91	1115.9	989.955	1030.62	1036.14	1072.66	1154.2	1120.85
ARSG	517.713	0.0197625	0.132229	0.149456	0.881194	0.939936	521.446	513.979	543.255	546.184	474.899	461.761	496.96	583.217
ARSJ	3.94468	0.972918	1.01481	0.958718	0.337701	NA	5.24065	2.64871	2.12209	4.3486	9.25127	2.20938	2.01606	3.72068
ARSK	115.777	-0.0934331	0.188103	-0.496713	0.619392	0.77429	112.04	119.513	111.41	109.585	115.127	118.202	124.996	115.341
ART5	5.92145	-0.68321	0.816317	-0.836942	0.402625	0.596014	4.55537	7.28753	2.12209	4.3486	7.19543	4.41877	9.07229	8.37153
ARTN	89.0337	-0.521702	0.251637	-2.07324	0.0381503	0.114101	73.0811	104.986	67.9069	72.1867	79.1498	95.0035	138.1	81.855
ARV1	467.69	0.0627832	0.126655	0.495703	0.620104	0.774618	478.115	457.266	537.95	457.473	438.921	440.772	456.638	474.387
ARVCF	158.866	-1.3734	0.250648	-5.47938	4.27e-08	1.26e-06	88.2501	229.482	54.1133	107.845	102.792	203.263	284.265	200.917
ARX	12.6524	1.08895	0.579193	1.88011	0.0600933	0.159656	17.2361	8.06874	20.1599	13.0458	18.5025	9.94223	4.03213	10.2319
ASAH1	1553.99	0.167322	0.094795	1.7651	0.0775478	0.191354	1644.16	1463.82	1773.01	1555.93	1603.55	1507.9	1445.52	1438.04
ASAH2	14.4273	0.112962	0.519002	0.217652	0.8277	0.911605	15.0485	13.806	20.1599	9.56692	15.4188	14.361	13.1044	13.9525
ASAH2B	11.6853	-0.549432	0.595778	-0.922208	0.35642	0.553365	9.53925	13.8314	7.42731	7.82748	13.3629	9.94223	11.0884	20.4637
ASAP1	2212.18	0.214991	0.104287	2.06153	0.0392528	0.116312	2376.28	2048.07	2092.38	2612.64	2423.83	2072.4	2029.17	2042.65
ASAP2	2181.17	-0.0782205	0.0865326	-0.903942	0.366026	0.561764	2121.61	2240.73	2055.24	2240.4	2069.2	2307.7	2214.65	2199.85
ASAP3	402.462	-0.201269	0.155355	-1.29555	0.195132	0.368987	374.384	430.54	298.154	392.244	432.754	395.48	450.59	445.551
ASB1	699.408	-0.420834	0.109707	-3.83598	0.000125066	0.00118652	597.962	800.854	561.293	609.674	622.919	787.645	856.827	758.089
ASB13	568.118	-0.24072	0.116421	-2.06767	0.0386711	0.115121	520.863	615.373	512.485	505.307	544.797	599.848	672.357	573.915
ASB14	26.2002	0.179422	0.429692	0.417559	0.67627	0.815	27.8764	24.5239	37.1366	15.655	30.8376	30.9314	22.1767	20.4637
ASB16	72.2731	-0.299341	0.320039	-0.935329	0.349619	0.547185	64.7968	79.7494	39.2587	73.9262	81.2056	53.0252	98.7871	87.436
ASB16-AS1	190.936	-0.109656	0.157338	-0.696949	0.485835	0.667549	183.808	198.065	177.194	174.814	199.416	192.216	194.55	207.428
ASB3	23.271	0.913166	0.476777	1.91529	0.0554559	0.150688	30.4753	16.0668	48.8081	20.0036	22.6142	16.5704	12.0964	19.5336
ASB6	578.232	-0.225727	0.123914	-1.82164	0.0685095	0.175642	532.841	623.623	473.226	560.969	564.327	614.209	674.373	582.286
ASB7	810.923	0.168437	0.0991781	1.69833	0.0894462	0.211986	858.034	763.813	848.836	856.674	868.591	786.541	781.225	723.672
ASB8	1152.89	0.265952	0.105007	2.5327	0.0113186	0.0453476	1259.08	1046.71	1370.87	1215	1191.36	1063.82	977.791	1098.53
ASB9	18.5975	-1.19654	0.485873	-2.46266	0.013791	0.0529697	11.4046	25.7905	16.9767	6.95776	10.2792	22.0938	29.2329	26.0448
ASCC1	922.051	0.163709	0.104396	1.56816	0.116844	0.256803	974.605	869.496	1020.73	935.819	967.272	866.079	809.45	932.96
ASCC2	1040.8	-0.213267	0.14373	-1.4838	0.137861	0.28893	963.785	1117.81	751.22	1056.71	1083.43	1052.77	1196.53	1104.11
ASCC3	2433.49	0.365301	0.0851943	4.28785	1.8e-05	0.000234321	2739.57	2127.4	2653.67	2831.81	2733.24	2225.95	2050.34	2105.9
ASCL2	301.818	-0.362796	0.165495	-2.19219	0.0283661	0.0910213	264.112	339.524	237.674	267.874	286.789	283.906	407.245	327.42
ASF1A	789.245	0.112127	0.125352	0.8945	0.371055	0.566844	819.988	758.501	941.147	776.66	742.157	811.949	703.606	759.949
ASF1B	2041.78	-0.058621	0.110656	-0.529757	0.59628	0.755499	2000.08	2083.48	1719.95	2068.19	2212.08	2084.55	2126.95	2038.93
ASGR1	9.53633	-0.291293	0.657722	-0.442882	0.657851	0.802293	8.56822	10.5044	5.30522	12.1761	8.22335	6.62815	9.07229	15.8129
ASH1L	5656.45	-0.107994	0.0897852	-1.2028	0.229053	0.411854	5444.33	5868.58	5257.48	5941.06	5134.45	5999.58	5713.52	5892.63
ASH1L-AS1	109.904	-0.1171	0.20434	-0.573063	0.566602	0.733506	105.469	114.338	115.654	111.324	89.4289	103.841	121.972	117.201
ASH2L	1204.87	0.130048	0.106245	1.22404	0.220939	0.401591	1259.64	1150.1	1381.48	1156.73	1240.7	1102.48	1133.03	1214.8
ASIC1	813.999	-0.364273	0.124533	-2.92511	0.0034433	0.01772	711.72	916.279	624.955	705.343	804.86	887.068	993.919	867.849
ASIC3	108.804	-0.588623	0.230839	-2.54993	0.0107744	0.0436743	86.821	130.787	63.6627	99.1481	97.6523	110.469	145.157	136.735
ASIC4	3.28831	0.223487	1.06102	0.210634	0.833173	NA	3.52745	3.04916	2.12209	4.3486	4.11168	4.41877	1.00803	3.72068
ASL	673.271	-0.751241	0.171494	-4.38055	1.18e-05	0.00016508	501.719	844.822	392.587	512.265	600.305	778.808	1017.1	738.555
ASNA1	1808.06	-0.474542	0.121224	-3.9146	9.06e-05	0.000902105	1513.13	2102.98	1260.52	1611.59	1667.28	1989.55	2211.62	2107.77
ASNS	2200.99	0.339538	0.106371	3.19202	0.00141279	0.00877822	2459.12	1942.86	2767.2	2266.49	2343.66	1982.92	1834.62	2011.03
ASNSD1	1639.9	0.0936332	0.111452	0.840124	0.400839	0.594782	1693.08	1586.72	1879.11	1603.76	1596.36	1746.52	1479.79	1533.85
ASPH	6308.2	0.270037	0.085967	3.14117	0.00168276	0.0100415	6896.85	5719.55	7355.16	6701.19	6634.19	6000.69	5510.91	5647.06
ASPHD1	205.18	-0.771243	0.187966	-4.10311	4.08e-05	0.000464871	151.601	258.76	144.302	163.507	146.992	203.263	313.498	259.517
ASPHD2	38.0185	0.807894	0.364929	2.21384	0.02684	0.0871819	48.4196	27.6174	50.9302	40.8768	53.4518	34.2455	15.1205	33.4861
ASPM	3661.7	-0.245309	0.100336	-2.44488	0.0144899	0.0550679	3350.48	3972.92	3221.33	3720.66	3109.45	4175.74	3977.69	3765.33
ASPN	7.45847	0.444344	0.70353	0.631591	0.527654	0.702136	8.57926	6.33767	6.36627	12.1761	7.19543	5.52346	6.04819	7.44136
ASPRV1	42.4004	0.0340439	0.30942	0.110025	0.91239	0.956433	42.9766	41.8242	44.5639	39.1374	45.2284	41.9783	33.2651	50.2292
ASPSCR1	344.001	-0.691445	0.192545	-3.59108	0.000329315	0.00266352	263.008	424.995	210.087	275.701	303.236	368.967	542.321	363.696
ASRGL1	267.451	-0.0345098	0.140646	-0.245367	0.806172	0.898248	264.387	270.514	271.627	240.912	280.622	273.964	276.201	261.378
ASS1	7402.11	-0.32468	0.115497	-2.81115	0.00493645	0.0235387	6572.56	8231.66	5552.45	6733.37	7431.85	7870.93	8683.19	8140.85
ASTE1	331.236	0.263746	0.144458	1.82575	0.0678874	0.174595	361.795	300.677	372.427	313.099	399.86	279.487	304.426	318.118
ASTL	6.37431	-1.15737	0.768048	-1.5069	0.131836	0.279973	3.95595	8.79267	5.30522	3.47888	3.08376	9.94223	8.06426	8.37153
ASTN2	186.13	-0.304599	0.186886	-1.62987	0.10313	0.234394	166.483	205.776	148.546	184.381	166.523	171.227	247.976	198.126
ASUN	1361.98	0.299828	0.120802	2.48197	0.0130657	0.0507901	1503.19	1220.77	1745.42	1389.81	1374.33	1282.55	1137.06	1242.71
ASXL1	2411.62	-0.0428892	0.0886871	-0.483601	0.628669	0.780606	2375.74	2447.49	2221.83	2395.21	2510.18	2386.13	2510	2446.35
ASXL2	2391.85	-0.179073	0.132054	-1.35606	0.175079	0.341512	2243.03	2540.67	1812.26	2620.47	2296.37	2691.03	2470.69	2460.3
ASZ1	3.27596	0.550482	1.04967	0.524434	0.599977	NA	3.90322	2.64871	5.30522	4.3486	2.05584	2.20938	2.01606	3.72068
ATAD1	1529.08	0.179738	0.0922942	1.94744	0.0514817	0.142636	1624.39	1433.77	1742.24	1571.58	1559.35	1428.37	1452.57	1420.37
ATAD2	13645.4	0.023919	0.079749	0.299929	0.764231	0.873278	13758.3	13532.6	14084.3	13946.8	13243.7	14227.3	12958.2	13412.1
ATAD2B	1912.68	0.107281	0.0945652	1.13447	0.256598	0.444295	1983.35	1842.01	2000.07	2115.16	1834.84	1917.75	1808.41	1799.88
ATAD3A	387.048	-0.995609	0.220539	-4.51444	6.35e-06	9.72e-05	258.356	515.741	170.828	294.835	309.404	446.296	657.237	443.691
ATAD3B	245.711	-1.07621	0.224	-4.80452	1.55e-06	2.93e-05	157.851	333.571	109.288	184.381	179.886	303.79	424.381	272.54
ATAD3C	38.5096	-0.492077	0.333312	-1.47632	0.139857	0.292156	31.8661	45.1531	25.4651	38.2677	31.8655	49.7111	50.4016	35.3465
ATAD5	893.73	0.306569	0.0996447	3.07662	0.00209363	0.0120042	988.328	799.132	971.917	1028.88	964.188	786.541	768.12	842.734
ATAT1	333.864	-0.186618	0.133319	-1.39978	0.161578	0.323559	312.022	355.707	292.848	346.148	297.069	361.234	347.771	358.115
ATCAY	5.13761	0.0436037	0.829585	0.0525608	0.958082	NA	5.21	5.06522	4.24418	5.21832	6.16751	4.41877	7.05622	3.72068
ATE1	1135.49	0.0738739	0.0948611	0.778758	0.436122	0.626069	1164.32	1106.66	1162.91	1199.34	1130.71	1159.93	1050.37	1109.69
ATE1-AS1	8.51192	0.340484	0.740658	0.459704	0.645729	0.792344	9.5238	7.50004	8.48836	13.9155	6.16751	5.52346	3.0241	13.9525
ATF1	1541.29	0.207129	0.102029	2.03011	0.0423458	0.123311	1651.85	1430.73	1817.57	1572.45	1565.52	1501.28	1365.88	1425.02
ATF2	1006.23	0.149911	0.0921384	1.62702	0.103733	0.235181	1058.28	954.188	1048.31	1086.28	1040.25	967.71	952.59	942.262
ATF3	664.554	1.40104	0.111933	12.5168	6.05e-36	6.8e-34	964.058	365.05	931.597	919.294	1041.28	372.281	362.891	359.976
ATF4	8330.37	0.390242	0.0962548	4.05426	5.03e-05	0.00055559	9450.8	7209.94	10392.9	8721.55	9237.91	6840.25	7211.46	7578.09
ATF5	1038.33	0.0326055	0.0983679	0.331464	0.740294	0.857601	1050.12	1026.54	1071.66	1061.06	1017.64	975.443	1097.75	1006.44
ATF6	1360.24	0.145753	0.090738	1.6063	0.108207	0.242525	1428.68	1291.8	1423.92	1421.99	1440.11	1367.61	1252.98	1254.8
ATF6B	2457.41	-0.383817	0.119581	-3.20968	0.00132884	0.00834909	2132.3	2782.53	1805.9	2247.36	2343.66	2563.99	2995.87	2787.72
ATF7	864.126	0.246226	0.0999153	2.46435	0.0137263	0.052747	937.485	790.767	933.719	934.079	944.657	845.089	757.032	770.181
ATF7IP	1773.23	-0.279053	0.0848701	-3.28801	0.001009	0.00662466	1602.03	1944.44	1571.41	1668.12	1566.55	1951.99	1923.32	1958.01
ATF7IP2	237.005	0.255387	0.150428	1.69773	0.0895582	0.212093	257.99	216.02	287.543	253.088	233.338	213.206	222.775	212.079
ATG10	274.816	0.12821	0.138614	0.924948	0.354993	0.552069	287.248	262.385	292.848	268.743	300.152	254.079	254.024	279.051
ATG101	1407.81	-0.11223	0.0990664	-1.13288	0.257264	0.445051	1353.04	1462.57	1262.64	1387.2	1409.28	1376.45	1557.41	1453.86
ATG12	1439.58	0.159149	0.0903503	1.76146	0.0781603	0.192117	1519.21	1359.94	1601.12	1456.78	1499.73	1332.26	1370.92	1376.65
ATG13	1780.34	0.0872473	0.0901685	0.967604	0.333242	0.530433	1834.26	1726.42	1751.78	1824.67	1926.32	1655.93	1792.28	1731.05
ATG14	568.234	0.0734786	0.109111	0.673428	0.500675	0.679341	582.528	553.94	595.246	593.149	559.188	582.173	538.289	541.359
ATG16L1	841.364	-0.000129828	0.0980885	-0.00132358	0.998944	0.999524	841.505	841.223	863.69	809.709	851.117	851.718	812.474	859.477
ATG16L2	470.968	-0.663098	0.161847	-4.09707	4.18e-05	0.000476104	364.146	577.79	276.933	433.12	382.386	589.906	605.827	537.638
ATG2A	524.788	-0.941639	0.200265	-4.70197	2.58e-06	4.61e-05	359.08	690.497	240.857	420.075	416.307	625.256	828.602	617.633
ATG2B	2769.56	-0.0399521	0.0936276	-0.426712	0.669589	0.80996	2730.77	2808.34	2481.78	2924.87	2785.66	2831.33	2837.61	2756.09
ATG3	1851.26	0.310584	0.122965	2.52579	0.0115438	0.0460712	2050.06	1652.45	2384.17	1821.19	1944.82	1728.84	1503.98	1724.54
ATG4A	191.874	0.215743	0.168478	1.28054	0.200354	0.37567	206.3	177.448	231.308	197.426	190.165	184.484	156.245	191.615
ATG4B	877.131	-0.433036	0.138032	-3.13722	0.00170557	0.0101582	746.222	1008.04	622.833	836.67	779.163	903.638	1127.99	992.491
ATG4C	255.288	0.104618	0.150397	0.695612	0.486672	0.668286	264.443	246.133	289.665	260.046	243.617	262.917	255.032	220.45
ATG4D	283.301	-1.08553	0.204482	-5.30867	1.1e-07	3.01e-06	181.215	385.387	123.081	213.951	206.612	344.664	450.59	360.906
ATG5	1019.49	0.0819476	0.132775	0.617191	0.537109	0.71009	1048.7	990.272	1254.15	912.336	979.607	1045.04	943.518	982.26
ATG7	1279.01	0.0564512	0.0877726	0.643153	0.520125	0.696236	1304.12	1253.9	1332.67	1279.36	1300.32	1249.41	1275.16	1237.13
ATG9A	1280.97	-0.535203	0.167822	-3.18911	0.00142709	0.0088478	1045.87	1516.08	754.403	1121.94	1261.26	1421.74	1700.55	1425.95
ATG9B	4.46228	0.268709	0.874478	0.307279	0.758631	NA	4.86736	4.05719	4.24418	5.21832	5.13959	4.41877	4.03213	3.72068
ATHL1	875.043	-0.427502	0.15625	-2.73602	0.00621876	0.0283303	746.136	1003.95	594.185	787.966	856.256	950.035	1175.37	886.452
ATIC	6493.8	0.167371	0.0813054	2.05854	0.0395379	0.117023	6870.5	6117.09	7264.97	6521.16	6825.38	6015.05	6097.58	6238.65
ATL1	24.9636	-0.0736063	0.424777	-0.173282	0.86243	0.931831	24.2866	25.6407	26.5261	27.831	18.5025	32.0361	15.1205	29.7654
ATL2	2451.14	0.0757843	0.0889803	0.851697	0.394382	0.588464	2515.39	2386.89	2661.1	2490.01	2395.05	2496.6	2362.83	2301.24
ATL3	3386.49	0.0457453	0.10436	0.438343	0.661138	0.804384	3440.22	3332.76	3784.75	3365.82	3170.1	3543.85	3046.27	3408.14
ATM	1558.28	-0.142084	0.0917414	-1.54875	0.121443	0.263883	1481.26	1635.3	1495.01	1555.93	1392.83	1682.45	1631	1592.45
ATMIN	3058.57	0.137719	0.0791129	1.74079	0.0817198	0.19841	3204.44	2912.69	3200.11	3147.52	3265.7	2991.51	2829.55	2917.01
ATN1	3423.66	-0.669197	0.151038	-4.43065	9.4e-06	0.000136409	2643.32	4204	2005.37	2872.68	3051.89	3886.31	4741.78	3983.92
ATOH7	10.0076	-0.342191	0.610335	-0.560662	0.575028	0.73956	8.81228	11.2029	8.48836	8.6972	9.25127	11.0469	15.1205	7.44136
ATOH8	7.08158	-0.521421	0.811784	-0.642316	0.520668	0.696723	5.80942	8.35373	1.06104	6.08804	10.2792	5.52346	12.0964	7.44136
ATOX1	1318.2	-0.0274043	0.0963205	-0.284511	0.776019	0.881032	1305.91	1330.48	1337.98	1284.58	1295.18	1324.53	1241.9	1425.02
ATP10D	18.1557	2.98882	0.571526	5.22955	1.7e-07	4.35e-06	32.196	4.11537	31.8313	33.9191	30.8376	5.52346	4.03213	2.79051
ATP11A	2101.04	-0.208838	0.160406	-1.30194	0.192937	0.36622	1948.82	2253.26	1406.95	2379.55	2059.95	2198.34	2346.7	2214.73
ATP11A-AS1	5.18271	-0.638224	0.880308	-0.725	0.468452	0.65335	4.0018	6.36362	2.12209	7.82748	2.05584	5.52346	7.05622	6.51119
ATP11B	1231.65	-0.10319	0.0983862	-1.04883	0.294258	0.487321	1187.32	1275.99	1214.9	1235.87	1111.18	1352.14	1224.76	1251.08
ATP11C	1522.33	0.288129	0.09104	3.16486	0.0015516	0.00943268	1673.89	1370.77	1762.4	1628.99	1630.28	1420.63	1321.53	1370.14
ATP13A1	1511.34	-0.646207	0.194953	-3.31467	0.000917501	0.00613552	1178.21	1844.47	793.662	1285.45	1455.53	1694.6	2239.85	1598.96
ATP13A2	486.673	-1.07226	0.217603	-4.92761	8.32e-07	1.7e-05	313.481	659.865	202.66	357.455	380.33	592.115	826.586	560.893
ATP13A3	5490.09	-0.130248	0.0883757	-1.4738	0.140536	0.293022	5241.96	5738.21	5195.94	5527.07	5002.88	6104.53	5421.2	5688.92
ATP13A4	23.776	0.757044	0.42604	1.77693	0.0755794	0.188284	29.9091	17.643	22.2819	30.4402	37.0051	16.5704	13.1044	23.2542
ATP1A1	37613.8	-0.0141676	0.0759242	-0.186601	0.851973	0.925884	37429	37798.6	35488.8	38233.8	38564.4	37381.7	37531	38483
ATP1A1-AS1	228.194	0.179764	0.161904	1.11031	0.266866	0.455818	242.388	214	234.491	258.307	234.366	185.588	248.984	207.428
ATP1A3	137.184	-0.177066	0.228348	-0.775425	0.438089	0.627836	128.613	145.756	88.0667	137.416	160.355	155.762	152.213	129.294
ATP1B1	3200.75	0.300196	0.104222	2.88037	0.00397213	0.0197728	3532.78	2868.73	3940.72	3357.99	3299.62	2971.62	2656.16	2978.4
ATP1B2	15.8254	-0.359313	0.493024	-0.728794	0.466128	0.651689	13.8199	17.831	8.48836	16.5247	16.4467	17.6751	18.1446	17.6732
ATP1B3	2315.68	0.106453	0.120331	0.884663	0.376338	0.571739	2401.3	2230.06	2785.24	2109.94	2308.71	2406.02	2104.77	2179.39
ATP2A1	70.3185	-0.45549	0.272948	-1.66878	0.0951607	0.221438	59.1522	81.4847	41.3807	71.317	64.7589	89.4801	67.5381	87.436
ATP2A1-AS1	16.8282	-0.720211	0.477868	-1.50713	0.131777	0.279949	12.7572	20.8993	12.7325	12.1761	13.3629	16.5704	19.1526	26.9749
ATP2A2	10025.8	-0.0826791	0.0821389	-1.00658	0.314138	0.50895	9738.37	10313.3	9085.73	10196.6	9932.78	10096.9	10522.8	10320.2
ATP2A3	4236.8	-0.612726	0.174251	-3.51634	0.000437545	0.00335365	3350.17	5123.43	2484.97	3661.52	3904.04	4550.23	6350.6	4469.47
ATP2B1	3360.84	-0.0931416	0.0897958	-1.03726	0.299615	0.492985	3252.45	3469.23	3480.23	3189.26	3087.87	3613.45	3303.32	3490.93
ATP2B4	1245.29	0.0102668	0.104425	0.0983172	0.92168	0.961514	1249.46	1241.13	1217.02	1369.81	1161.55	1186.44	1305.4	1231.55
ATP2C1	3198.07	0.132105	0.0835345	1.58144	0.113776	0.251817	3344.26	3051.89	3473.86	3335.38	3223.55	3188.14	2956.56	3010.96
ATP2C2	832.884	-0.390133	0.141646	-2.75429	0.00588199	0.0270903	720.739	945.03	582.514	769.702	810	893.696	1049.36	892.033
ATP5A1	13982	0.0666766	0.091875	0.725732	0.468003	0.65305	14305.4	13658.6	15751.2	13318	13847.1	13863.9	13189.1	13922.8
ATP5B	26502.9	0.0844824	0.0903061	0.935511	0.349525	0.547093	27279.2	25726.7	29937.4	25144.5	26755.7	25690.7	25298.6	26190.8
ATP5C1	6382.62	0.183621	0.103565	1.773	0.076228	0.189408	6788.56	5976.67	7743.51	6304.6	6317.59	6065.86	5802.23	6061.92
ATP5D	423.617	-1.3109	0.2309	-5.67736	1.37e-08	4.51e-07	243.218	604.016	162.34	277.441	289.873	476.122	809.45	526.476
ATP5E	277.636	-1.31664	0.684601	-1.92322	0.0544525	0.148562	159.005	396.268	65.7848	242.652	168.579	196.635	634.052	358.115
ATP5F1	10123.6	0.0542706	0.10725	0.506018	0.612844	0.768922	10314.4	9932.89	11887.9	9484.29	9570.95	10078.1	9538	10182.6
ATP5G1	1792.01	-0.0366271	0.0972442	-0.37665	0.706433	0.834822	1769.76	1814.25	1786.8	1690.74	1831.75	1687.97	1790.26	1964.52
ATP5G2	8665.31	-0.0656611	0.085054	-0.771993	0.440119	0.629507	8468.37	8862.25	8094.71	8147.54	9162.87	8781.2	8794.07	9011.49
ATP5G3	6148.96	0.145418	0.0982265	1.48043	0.138758	0.290291	6459.13	5838.8	7205.56	5943.67	6228.16	5639.45	5823.4	6053.55
ATP5H	3706.75	0.264741	0.108549	2.43891	0.0147315	0.0556728	4046.24	3367.26	4668.6	3773.71	3696.4	3315.18	3372.87	3413.72
ATP5I	2112.75	-0.178791	0.109203	-1.63723	0.101582	0.23181	1982.26	2243.24	2079.65	1982.96	1884.18	1972.98	2490.85	2265.89
ATP5J	1532.49	0.283758	0.118879	2.38694	0.0169891	0.0618987	1683.12	1381.86	1935.35	1551.58	1562.44	1356.56	1293.3	1495.71
ATP5J2	2011.72	0.0254182	0.116229	0.21869	0.826891	0.911324	2029.77	1993.68	2159.23	2077.76	1852.31	1796.23	1914.25	2270.54
ATP5L	5337.21	0.0706439	0.0906448	0.779348	0.435775	0.625685	5468.37	5206.05	5952.46	5115.69	5336.95	5072.75	5155.08	5390.34
ATP5O	3342.43	0.0920831	0.119161	0.772764	0.439662	0.629332	3449.47	3235.39	4075.47	3048.37	3224.58	3264.37	3111.79	3330.01
ATP5S	406.336	-0.317303	0.138114	-2.29739	0.0215964	0.0742081	361.444	451.229	323.619	400.941	359.772	496.007	410.269	447.412
ATP5SL	775.381	-0.485697	0.126166	-3.84967	0.000118278	0.00113112	645.817	904.945	545.377	687.948	704.124	880.44	964.687	869.709
ATP6AP1	5810.07	-0.196985	0.103795	-1.89782	0.0577194	0.155235	5414.01	6206.14	4771.52	5515.76	5954.73	5864.81	6467.53	6286.09
ATP6AP1L	178.602	0.253695	0.160124	1.58437	0.11311	0.250762	194.175	163.03	185.683	208.733	188.109	162.39	159.269	167.431
ATP6AP2	2030.63	0.293008	0.0990592	2.95791	0.00309734	0.0163405	2236.54	1824.71	2448.89	2090.81	2169.94	1806.17	1749.94	1918.01
ATP6V0A1	1296.11	-0.0728962	0.0990949	-0.735619	0.461962	0.648234	1263.21	1329	1148.05	1295.01	1346.57	1325.63	1326.57	1334.79
ATP6V0A2	1270.7	0.128626	0.0917652	1.40168	0.161009	0.322705	1327.39	1214	1299.78	1319.37	1363.02	1220.68	1157.22	1264.1
ATP6V0A4	108.983	-0.251118	0.19889	-1.26259	0.206735	0.383734	99.3639	118.601	91.2499	106.106	100.736	130.354	112.9	112.551
ATP6V0B	1828.57	-0.00467903	0.110076	-0.0425071	0.966094	0.983099	1825.77	1831.37	1635.07	1809.02	2033.22	1697.91	1880.99	1915.22
ATP6V0C	1575.02	-0.345203	0.137393	-2.51252	0.0119872	0.047499	1387.3	1762.74	1110.91	1519.4	1531.6	1590.76	1903.16	1794.3
ATP6V0D1	1715.27	-0.212545	0.136072	-1.56201	0.118286	0.258991	1589.11	1841.43	1297.66	1619.42	1850.25	1687.97	2015.06	1821.27
ATP6V0E1	3653.99	0.225089	0.103781	2.16888	0.0300916	0.0952584	3938.97	3369.01	4389.54	3471.92	3955.43	3314.08	3382.96	3410
ATP6V0E2	892.939	-0.413116	0.147994	-2.79143	0.00524751	0.0247033	765.723	1020.16	592.063	814.927	890.178	1005.27	1089.68	965.516
ATP6V0E2-AS1	76.8795	-0.313934	0.233725	-1.34318	0.179215	0.347353	68.6091	85.1499	63.6627	66.0987	76.066	75.1191	94.755	85.5756
ATP6V1A	3642.19	0.0121129	0.0857282	0.141294	0.887637	0.943315	3657.58	3626.79	3855.84	3573.68	3543.24	3751.53	3444.44	3684.4
ATP6V1B1	75.797	-0.531269	0.263009	-2.01996	0.0433874	0.12552	62.0901	89.5038	55.1743	47.8346	83.2614	95.0035	90.7229	82.7851
ATP6V1B1-AS1	5.91234	-0.368529	0.780329	-0.472274	0.636731	0.786375	5.15727	6.66742	4.24418	6.08804	5.13959	4.41877	9.07229	6.51119
ATP6V1B2	1411.88	0.142334	0.0876412	1.62405	0.104364	0.236162	1481.56	1342.2	1539.58	1468.09	1437.03	1343.31	1333.63	1349.68
ATP6V1C1	3681.19	0.0936118	0.0841083	1.11299	0.265712	0.454799	3800.65	3561.73	3974.67	3647.61	3779.66	3723.92	3442.43	3518.83
ATP6V1C2	215.762	0.668023	0.151477	4.41006	1.03e-05	0.000147832	264.992	166.532	258.895	262.655	273.426	151.343	173.381	174.872
ATP6V1D	1497.4	0.288909	0.0995993	2.90071	0.00372313	0.0188722	1646.98	1347.81	1813.33	1567.24	1560.38	1378.66	1334.63	1330.14
ATP6V1E1	1858.07	0.283443	0.100854	2.81043	0.00494754	0.0235844	2040.36	1675.77	2252.6	1879.46	1989.02	1693.49	1614.87	1718.95
ATP6V1E2	155.28	0.020133	0.188957	0.106548	0.915148	0.95766	156.568	153.992	190.988	134.807	143.909	150.238	158.261	153.478
ATP6V1F	1876.4	-0.323493	0.0931623	-3.47236	0.00051591	0.00383866	1667.04	2085.75	1621.28	1627.25	1752.6	1995.07	2229.77	2032.42
ATP6V1G1	3525.23	0.348812	0.0838415	4.16038	3.18e-05	0.000376147	3949.64	3100.82	4182.64	3763.28	3903.01	3111.92	3038.21	3152.35
ATP6V1G2	25.2265	0.0711266	0.398565	0.178457	0.858364	0.930019	25.857	24.5959	25.4651	24.3522	27.7538	20.9891	33.2651	19.5336
ATP6V1H	1552.42	0.120213	0.101347	1.18616	0.235561	0.419812	1617.37	1487.47	1792.1	1526.36	1533.65	1491.33	1446.53	1524.55
ATP7A	761.721	-0.117556	0.10839	-1.08456	0.278117	0.467941	730.399	793.043	713.022	774.051	704.124	790.96	847.755	740.415
ATP7B	706.37	-0.16006	0.124277	-1.28793	0.197769	0.372566	667.007	745.733	578.269	711.431	711.32	712.526	808.442	716.231
ATP8A1	551.722	0.271771	0.122452	2.21941	0.0264588	0.0862572	603.395	500.05	571.903	668.815	569.467	465.075	527.201	507.873
ATP8A2	92.6817	-0.790807	0.231491	-3.41615	0.000635144	0.0045597	67.9528	117.411	68.9679	60.8804	74.0102	134.772	93.747	123.713
ATP8B1	1527.67	0.16674	0.0945098	1.76426	0.0776874	0.191619	1615.43	1439.9	1595.81	1728.13	1522.35	1492.44	1415.28	1412
ATP8B2	1917.5	-0.24442	0.104208	-2.3455	0.0190013	0.0673179	1755.24	2079.77	1567.16	1881.2	1817.36	1957.51	2182.39	2099.39
ATP8B3	20.7339	-0.514166	0.472455	-1.08829	0.276469	0.466421	17.0464	24.4214	9.5494	20.0036	21.5863	17.6751	33.2651	22.3241
ATP9A	19668.4	0.0460691	0.0918597	0.501516	0.616008	0.771551	19982	19354.8	18047.3	21561.2	20337.4	18993	19960	19111.3
ATP9B	161.596	-0.649923	0.245884	-2.64321	0.00821234	0.0353968	125.748	197.443	83.8225	133.067	160.355	160.18	247.976	184.174
ATPAF1	1456.05	0.0945544	0.110496	0.855724	0.39215	0.587108	1504.14	1407.95	1702.98	1361.11	1448.34	1416.22	1353.79	1453.86
ATPAF2	455.111	-0.12898	0.146289	-0.881682	0.377949	0.573339	434.825	475.398	367.122	458.342	479.01	430.83	458.655	536.708
ATPIF1	1860.62	0.0110025	0.0959814	0.114632	0.908737	0.954943	1868.09	1853.15	2037.21	1762.05	1805.03	1843.73	1802.36	1913.36
ATR	2438.31	0.200018	0.0907198	2.20479	0.0274686	0.088858	2606.76	2269.87	2622.9	2739.62	2457.75	2368.46	2150.13	2291.01
ATRAID	3214.55	0.155586	0.100128	1.55387	0.120217	0.261768	3388.3	3040.79	3713.66	3068.37	3382.88	2921.91	2997.89	3202.58
ATRIP	450.33	0.0824232	0.138382	0.595619	0.55143	0.721511	462.937	437.723	444.578	448.775	495.457	510.368	410.269	392.532
ATRN	1841.99	-0.185382	0.091745	-2.02062	0.0433194	0.125456	1723.46	1960.53	1632.95	1761.18	1776.24	2077.93	1893.08	1910.57
ATRNL1	370.94	-0.0329797	0.131696	-0.250423	0.80226	0.895982	366.559	375.321	394.709	373.98	330.99	401.003	365.916	359.046
ATRX	3930.18	-0.0833281	0.0950912	-0.876297	0.380869	0.57656	3816.56	4043.79	4091.39	3925.05	3433.25	4166.9	3954.51	4009.96
ATXN1	375.734	0.0728888	0.12912	0.564502	0.572412	0.737467	385.034	366.434	381.976	417.466	355.66	356.816	388.092	354.395
ATXN10	2822.07	0.178524	0.107749	1.65684	0.097551	0.225077	2996.79	2647.36	3428.24	2717.87	2844.25	2702.08	2581.57	2658.43
ATXN1L	3431.63	0.121302	0.0993076	1.22148	0.221904	0.402592	3575.59	3287.66	3208.6	3837.2	3680.98	3121.86	3446.46	3294.66
ATXN2	1252.09	-0.0758764	0.103925	-0.73011	0.465323	0.650855	1218.86	1285.32	1087.57	1309.8	1259.2	1280.34	1276.17	1299.45
ATXN2L	4506.9	-0.248517	0.141205	-1.75997	0.0784131	0.192632	4119.47	4894.32	3230.88	4483.41	4644.14	4469.58	5468.57	4744.8
ATXN3	1164.77	0.317125	0.104899	3.02314	0.0025017	0.0138181	1292.45	1037.09	1419.68	1243.7	1213.97	1061.61	981.823	1067.84
ATXN7	5030.57	0.427136	0.0811692	5.26229	1.42e-07	3.74e-06	5769.54	4291.6	5548.2	6108.91	5651.5	4332.6	4220.63	4321.57
ATXN7L1	223.899	0.614187	0.163416	3.75842	0.00017099	0.00154209	270.883	176.914	232.369	285.268	295.013	159.076	187.494	184.174
ATXN7L2	419.93	-0.597934	0.207221	-2.88549	0.0039081	0.0195292	333.901	505.959	212.209	389.634	399.86	467.285	571.554	479.038
ATXN7L3	1721.24	-0.284384	0.112754	-2.52216	0.0116636	0.0464659	1552.06	1890.42	1348.59	1595.07	1712.51	1785.18	1996.91	1889.18
ATXN7L3B	6600.26	0.0700663	0.0742614	0.943509	0.34542	0.542639	6760.62	6439.9	6877.69	6616.83	6787.35	6549.72	6282.05	6487.94
AUH	338.425	0.23746	0.147154	1.61368	0.106598	0.239887	366.273	310.578	412.746	359.194	326.878	329.198	274.185	328.35
AUNIP	345.476	0.119949	0.134573	0.891333	0.372751	0.568261	359.942	331.01	376.671	321.796	381.358	349.083	328.618	315.328
AUP1	2797.89	-0.0728287	0.0949449	-0.767063	0.443044	0.631781	2727.41	2868.36	2521.04	2732.66	2928.54	2706.5	2931.36	2967.24
AURKA	5879.48	-0.0973426	0.0896609	-1.08567	0.277623	0.467555	5681.61	6077.35	6186.95	5425.31	5432.55	6022.78	5911.1	6298.18
AURKAIP1	819.418	-0.823532	0.182238	-4.51898	6.21e-06	9.54e-05	591.524	1047.31	426.54	664.466	683.566	866.079	1236.86	1039
AURKAPS1	10.4492	0.212819	0.62036	0.343058	0.731555	0.851926	11.1953	9.70315	9.5494	14.7852	9.25127	11.0469	5.04016	13.0224
AURKB	1681.24	-0.20379	0.100982	-2.01808	0.0435832	0.125969	1562.75	1799.73	1502.44	1608.98	1576.83	1631.63	1955.58	1811.97
AUTS2	1258.75	-0.087102	0.0934958	-0.931614	0.351536	0.548747	1220.74	1296.77	1194.74	1257.61	1209.86	1230.63	1364.88	1294.8
AVEN	256.521	0.0729112	0.174434	0.417987	0.675957	0.814686	263.27	249.773	296.032	263.525	230.254	209.891	239.912	299.515
AVIL	77.0298	-0.497866	0.262199	-1.89881	0.0575893	0.15502	63.7824	90.2773	45.6249	74.7959	70.9264	86.166	78.6265	106.039
AVL9	4812.78	0.131977	0.081964	1.61018	0.107358	0.241143	5032.55	4593.01	5072.86	5145.26	4879.53	4778.9	4344.62	4655.5
AVPI1	494.497	0.0428662	0.130184	0.329275	0.741948	0.858873	502.13	486.865	568.72	456.603	481.066	463.971	523.169	473.457
AVPR1A	3.27578	0.248642	1.10396	0.225228	0.821802	NA	3.56058	2.99099	5.30522	4.3486	1.02792	3.31408	1.00803	4.65085
AVPR2	4.8755	-2.02871	1.04528	-1.94082	0.0522799	NA	1.90868	7.84231	1.06104	2.60916	2.05584	6.62815	2.01606	14.8827
AXDND1	7.07297	0.424758	0.760903	0.558229	0.576688	0.740897	8.10491	6.04104	6.36627	8.6972	9.25127	3.31408	11.0884	3.72068
AXIN1	1125.96	-0.542559	0.170347	-3.18501	0.00144748	0.00893646	916.528	1335.4	718.327	1028.01	1003.25	1106.9	1649.14	1250.15
AXIN2	38.9031	0.573519	0.319011	1.7978	0.0722084	0.182339	46.4596	31.3466	42.4418	54.7924	42.1447	30.9314	34.2731	28.8353
AXL	44.2031	1.2693	0.309221	4.10483	4.05e-05	0.000462102	62.5388	25.8675	67.9069	53.9226	65.7868	26.5126	23.1847	27.9051
AZGP1	9.30426	-0.105454	0.65278	-0.161546	0.871663	0.935557	9.03425	9.57427	9.5494	5.21832	12.335	6.62815	9.07229	13.0224
AZGP1P1	9.89064	-0.995419	0.78232	-1.27239	0.203233	0.378816	6.62225	13.159	3.18313	4.3486	12.335	18.7798	3.0241	17.6732
AZI2	1915.31	0.99738	0.100155	9.95841	2.32e-23	2.02e-21	2552.11	1278.52	2727.95	2421.3	2507.09	1381.97	1189.48	1264.1
AZIN1	6557.62	0.0571546	0.0911712	0.626893	0.530729	0.704778	6687.41	6427.83	7043.22	6547.25	6471.78	6928.63	5965.53	6389.34
AZIN1-AS1	48.1148	0.00554527	0.313304	0.0176993	0.985879	0.991822	48.2852	47.9444	45.6249	47.8346	51.3959	32.0361	62.498	49.299
AZIN2	30.8763	0.930586	0.359548	2.58821	0.00964752	0.0402525	40.4326	21.3199	38.1976	46.0952	37.0051	22.0938	24.1928	17.6732
B2M	15303.4	2.94621	0.0997646	29.5316	1.13e-191	3.81e-189	27091.4	3515.34	29853.6	24599.2	26821.5	3750.43	3368.84	3426.75
B3GALNT1	1786.1	0.330597	0.0907291	3.64379	0.000268656	0.00223949	1990	1582.21	2118.91	1895.99	1955.1	1628.32	1546.32	1571.99
B3GALNT2	826.245	0.200886	0.109117	1.84101	0.0656195	0.170428	883.809	768.681	881.728	917.554	852.145	736.83	722.759	846.455
B3GALT4	23.6293	-0.722968	0.418834	-1.72614	0.0843215	0.203096	17.8176	29.441	12.7325	19.1338	21.5863	23.1985	36.2891	28.8353
B3GALT5	8.1072	-0.328501	0.708666	-0.463548	0.642972	0.790648	7.20207	9.01233	3.18313	6.08804	12.335	7.73284	9.07229	10.2319
B3GALT6	370.796	-0.14433	0.179298	-0.804977	0.420833	0.612465	352.41	389.182	334.229	342.67	380.33	299.372	497.968	370.208
B3GAT1	4.66936	-1.12308	0.932568	-1.20429	0.228478	NA	2.9366	6.40211	1.06104	2.60916	5.13959	7.73284	4.03213	7.44136
B3GAT3	679.888	-0.792042	0.199472	-3.97069	7.17e-05	0.000746518	497.723	862.053	360.755	544.445	587.97	662.815	1080.61	842.734
B3GLCT	218.007	-0.057523	0.170728	-0.336928	0.736171	0.85486	213.617	222.398	242.979	197.426	200.444	247.451	231.847	187.894
B3GNT2	980.824	0.44208	0.111608	3.96101	7.46e-05	0.0007703	1130.21	831.443	1273.25	1046.27	1071.09	836.252	813.482	844.594
B3GNT3	211.843	0.11914	0.163016	0.730853	0.464869	0.650408	220.257	203.429	197.354	249.61	213.807	216.52	208.663	185.104
B3GNT4	129.451	-0.189485	0.22145	-0.855657	0.392187	0.587108	120.897	138.005	91.2499	129.588	141.853	120.411	164.309	129.294
B3GNT6	32.053	-0.354808	0.385769	-0.919744	0.357707	0.554584	28.0504	36.0556	15.9157	37.398	30.8376	32.0361	34.2731	41.8576
B3GNT7	15.6464	-0.352773	0.504511	-0.699239	0.484403	0.66636	13.7459	17.5469	19.0988	13.9155	8.22335	17.6751	19.1526	15.8129
B3GNT8	15.6292	-1.84772	0.592202	-3.12008	0.00180799	0.010674	6.79813	24.4603	7.42731	7.82748	5.13959	11.0469	36.2891	26.0448
B3GNT9	51.2971	-0.397554	0.286068	-1.38972	0.164614	0.327456	44.2552	58.3389	50.9302	41.7466	40.0888	64.0721	63.506	47.4387
B3GNTL1	73.0275	-0.822978	0.298846	-2.75386	0.00588976	0.0271181	52.7486	93.3063	54.1133	54.7924	49.3401	68.4909	136.084	75.3438
B4GALNT1	444.102	-0.357692	0.178784	-2.0007	0.0454252	0.129938	389.154	499.05	299.215	408.768	459.48	478.332	593.731	425.088
B4GALNT3	353.32	-0.745768	0.172532	-4.32249	1.54e-05	0.000206076	263.466	443.173	211.148	330.494	248.756	460.657	470.751	398.113
B4GALNT4	768.145	-0.327584	0.19243	-1.70235	0.0886891	0.210852	681.129	855.16	481.714	778.399	783.274	725.783	1057.43	782.273
B4GALT1	4277.07	-0.113409	0.0771965	-1.46909	0.141808	0.294921	4109.09	4445.04	4000.14	4097.25	4229.89	4359.12	4538.16	4437.84
B4GALT1-AS1	8.53989	-0.293422	0.738122	-0.397525	0.69098	0.824673	7.7189	9.36088	14.8546	5.21832	3.08376	9.94223	6.04819	12.0922
B4GALT2	946.244	-0.348348	0.123357	-2.82391	0.00474412	0.0228038	832.356	1060.13	714.083	901.03	881.954	978.757	1143.11	1058.53
B4GALT3	1293.55	-0.0883832	0.105713	-0.836066	0.403118	0.59651	1254.19	1332.91	1331.61	1232.39	1198.55	1330.05	1216.69	1452
B4GALT4	731.419	0.237332	0.105382	2.25212	0.0243149	0.0808986	791.717	671.122	825.493	731.434	818.223	668.339	674.373	670.653
B4GALT5	1510.73	-0.0943006	0.0905253	-1.0417	0.297549	0.490625	1461.2	1560.26	1388.91	1523.75	1470.95	1556.51	1515.07	1609.19
B4GALT6	156.213	0.0114882	0.187003	0.0614334	0.951014	0.976171	156.924	155.503	164.462	169.595	136.713	134.772	152.213	179.523
B4GALT7	500.539	-0.630943	0.166364	-3.79255	0.000149108	0.00137266	392.576	608.503	301.337	426.163	450.228	573.335	700.582	551.591
B4GAT1	437.982	-0.230583	0.116532	-1.97871	0.0478491	0.134834	403.226	472.738	405.319	398.332	406.028	452.924	466.719	498.571
B9D1	472.756	-0.43975	0.136804	-3.21446	0.00130692	0.00823405	400.896	544.616	338.473	436.599	427.614	560.079	570.546	503.222
B9D2	33.8027	-0.551649	0.369968	-1.49107	0.135943	0.286175	27.4912	40.1142	25.4651	20.0036	37.0051	36.4548	50.4016	33.4861
BAALC	3.46786	1.63459	1.09076	1.49857	0.133985	NA	5.24313	1.69259	7.42731	5.21832	3.08376	2.20938	1.00803	1.86034
BABAM1	1212.05	-0.30388	0.103832	-2.92663	0.00342651	0.0176687	1085.03	1339.08	1052.56	1092.37	1110.15	1209.64	1449.55	1358.05
BACE1	1665.54	0.00798921	0.0884307	0.0903444	0.928014	0.964168	1669.98	1661.1	1574.59	1729	1706.35	1640.47	1671.32	1671.52
BACE1-AS	28.7623	-0.158458	0.366	-0.432945	0.665055	0.806982	27.1994	30.3251	32.8924	26.0916	22.6142	33.1408	26.2088	31.6258
BACE2	1356.34	0.353334	0.0933644	3.78446	0.000154044	0.00140891	1521.7	1190.98	1448.33	1542.01	1574.77	1131.2	1228.79	1212.94
BACH1	448.349	0.275369	0.115176	2.39085	0.0168092	0.0614595	490.816	405.881	479.592	503.568	489.289	416.469	413.293	387.881
BACH2	25.1865	0.519888	0.389855	1.33354	0.182355	0.352161	29.7382	20.6349	28.6482	28.7008	31.8655	15.4657	23.1847	23.2542
BAD	329.136	-0.712024	0.182929	-3.89235	9.93e-05	0.000979584	249.3	408.972	204.782	274.831	268.287	382.223	507.04	337.652
BAG1	5028.33	0.206507	0.0927937	2.22544	0.0260514	0.0853411	5387.86	4668.81	5955.64	5099.17	5108.76	4696.05	4688.36	4622.01
BAG2	151.856	0.236767	0.188871	1.25359	0.209991	0.387686	164.077	139.635	165.523	181.771	144.937	161.285	119.956	137.665
BAG3	3223.04	0.316405	0.0847833	3.73193	0.00019002	0.00168147	3575.27	2870.82	3490.84	3495.4	3739.57	2752.89	3003.94	2855.62
BAG4	524.593	-0.0305626	0.124504	-0.245475	0.806089	0.89822	519.12	530.066	560.232	480.085	517.043	578.859	484.863	526.476
BAG5	2816	0.0356749	0.082465	0.432606	0.665301	0.806982	2850.57	2781.43	2905.14	2931.83	2714.73	2830.22	2794.26	2719.82
BAG6	4962.53	-0.351216	0.130524	-2.69082	0.00712768	0.0316715	4361.32	5563.73	3541.77	4599.95	4942.23	5078.27	6054.24	5558.7
BAGE	50.0681	0.371305	0.279931	1.32641	0.184703	0.355483	56.4632	43.673	61.5406	51.3135	56.5355	48.6065	43.3454	39.0671
BAHCC1	501.401	-0.623023	0.191136	-3.25957	0.0011158	0.00720796	394.534	608.268	297.093	472.258	414.251	510.368	760.056	554.381
BAHD1	1216.84	-0.298497	0.115304	-2.58877	0.0096318	0.040213	1091.27	1342.41	981.466	1129.77	1162.58	1257.14	1493.9	1276.19
BAIAP2	614.415	-0.581512	0.154448	-3.76511	0.000166476	0.00150487	492.077	736.753	403.197	526.181	546.853	660.606	866.907	682.745
BAIAP2-AS1	650.614	-0.448477	0.124726	-3.59568	0.000323541	0.00262365	550.213	751.016	478.531	563.578	608.528	710.317	801.385	741.345
BAIAP2L1	1159.99	-0.0889146	0.0928135	-0.957992	0.338067	0.534985	1124.16	1195.82	1166.09	1133.24	1073.15	1212.95	1213.67	1160.85
BAIAP2L2	53.9113	-0.807056	0.313707	-2.57264	0.0100926	0.0415526	39.2308	68.5919	26.5261	35.6585	55.5076	62.9674	78.6265	64.1817
BAIAP3	309.557	-1.13382	0.237932	-4.7653	1.89e-06	3.47e-05	193.51	425.604	129.447	249.61	201.472	357.92	564.498	354.395
BAK1	1229.27	0.151255	0.109658	1.37934	0.16779	0.331586	1293.45	1165.1	1140.62	1315.02	1424.7	1196.38	1162.26	1136.67
BAMBI	3190.76	0.331486	0.0928526	3.57002	0.000356949	0.00284697	3556.07	2825.45	3864.33	3265.8	3538.1	2836.85	2840.63	2798.88
BANF1	4309.24	-0.0210032	0.0942911	-0.222748	0.823732	0.909133	4278.28	4340.19	4127.46	4182.48	4524.9	3966.95	4423.24	4630.39
BANP	221.114	-0.5627	0.168485	-3.33977	0.000838486	0.00571799	178.135	264.093	153.851	207.863	172.69	285.011	269.145	238.124
BAP1	1190.46	-0.364942	0.135384	-2.69561	0.00702603	0.0313095	1040.43	1340.48	873.24	1135.85	1112.21	1236.15	1534.22	1251.08
BARD1	1072.81	0.394598	0.0920188	4.28823	1.8e-05	0.000234119	1218.53	927.087	1200.04	1204.56	1250.98	942.302	939.486	899.474
BARX2	26.9407	0.142984	0.382937	0.373387	0.708861	0.835972	28.3369	25.5444	30.7703	29.5705	24.6701	19.8845	24.1928	32.5559
BASP1	2821.6	-0.0349216	0.0895279	-0.390064	0.696489	0.828813	2787.61	2855.59	3014.43	2723.09	2625.3	2887.67	2823.5	2855.62
BATF	329.868	-0.291784	0.160783	-1.81476	0.0695602	0.177427	296.409	363.327	238.735	340.06	310.432	329.198	396.157	364.627
BATF2	678.855	5.08849	0.188734	26.9612	4.21e-160	1.28e-157	1318.81	38.8999	1182	1321.97	1452.45	36.4548	51.4096	28.8353
BAX	1298.14	-0.488672	0.117332	-4.16488	3.12e-05	0.000371077	1080.38	1515.91	940.086	1070.63	1230.42	1448.25	1579.59	1519.9
BAZ1A	4318.44	0.654593	0.0924264	7.08232	1.42e-12	7.54e-11	5281.73	3355.16	5728.58	5109.6	5006.99	3501.87	3183.36	3380.24
BAZ1B	5064.15	0.124483	0.0827404	1.5045	0.132451	0.280721	5282.14	4846.17	5275.51	5527.94	5042.97	5023.03	4658.12	4857.35
BAZ2A	6591.4	0.0695746	0.103357	0.673146	0.500854	0.679406	6750.05	6432.75	5872.88	7308.26	7069	6175.23	6601.6	6521.42
BAZ2B	1019.2	-0.0433422	0.108347	-0.400031	0.689134	0.823216	1003.85	1034.56	1017.54	1080.19	913.82	986.49	1013.07	1104.11
BBC3	124.8	-0.924485	0.20528	-4.50354	6.68e-06	0.000101497	86.2712	163.329	81.7005	77.4051	99.7081	142.505	187.494	159.989
BBIP1	286.955	0.00613237	0.146096	0.0419749	0.966519	0.983099	287.749	286.16	325.741	254.828	282.678	298.267	280.233	279.981
BBOX1-AS1	19.1407	-0.819601	0.453915	-1.80562	0.070977	0.180123	13.7893	24.4921	10.6104	17.3944	13.3629	20.9891	29.2329	23.2542
BBS1	505.745	-0.284764	0.150614	-1.89069	0.0586661	0.157074	455.75	555.739	387.281	512.265	467.703	503.74	648.165	515.314
BBS10	668.691	0.0312482	0.103777	0.301108	0.763332	0.873069	675.752	661.63	666.336	678.381	682.538	698.165	642.116	644.608
BBS12	49.3351	0.303113	0.322008	0.941322	0.34654	0.54382	54.6497	44.0205	72.151	43.486	48.3122	41.9783	34.2731	55.8102
BBS2	1451.85	0.185666	0.0858258	2.16329	0.0305185	0.096374	1545.13	1358.57	1574.59	1522.01	1538.79	1379.76	1364.88	1331.07
BBS4	780.704	0.117052	0.0989802	1.18258	0.236976	0.421317	812.178	749.23	813.821	838.41	784.302	754.505	762.072	731.114
BBS5	533.852	-0.203858	0.150099	-1.35815	0.174416	0.340431	495.97	571.735	432.906	568.797	486.206	503.74	667.317	544.149
BBS7	329.862	0.121645	0.133965	0.90804	0.363857	0.56026	343.649	316.075	358.633	355.715	316.599	313.733	338.699	295.794
BBS9	291.235	0.0818212	0.136712	0.598494	0.549511	0.720108	299.402	283.068	290.726	316.578	290.901	268.44	305.434	275.33
BBX	3060.24	0.383694	0.0915225	4.19235	2.76e-05	0.000335293	3464.34	2656.14	3304.09	3761.54	3327.37	2741.85	2576.53	2650.05
BCAM	2181.44	-0.794567	0.164726	-4.82356	1.41e-06	2.7e-05	1595.26	2767.61	1205.35	1773.36	1807.08	2337.53	3277.11	2688.19
BCAN	5.16567	0.128229	0.937569	0.136768	0.891214	NA	5.45406	4.87728	7.42731	1.73944	7.19543	3.31408	2.01606	9.3017
BCAP29	1391.57	0.28116	0.11157	2.52003	0.0117345	0.0466882	1526.61	1256.53	1691.31	1502.88	1385.63	1364.29	1202.58	1202.71
BCAP31	11371.5	0.198333	0.0828089	2.39507	0.0166173	0.0609301	12152.1	10590.9	11651.3	11934.3	12870.6	10149.9	11017.8	10604.9
BCAR1	373.141	-1.06436	0.238667	-4.4596	8.21e-06	0.00012184	241.105	505.176	144.302	314.839	264.175	429.725	630.02	455.783
BCAR3	336.617	-0.122467	0.126991	-0.964378	0.334857	0.532184	322.17	351.064	305.581	339.191	321.739	349.083	360.875	343.233
BCAS1	1127.42	0.36547	0.092337	3.958	7.56e-05	0.000775854	1269.61	985.23	1324.18	1259.35	1225.28	968.815	987.871	999.003
BCAS2	13554.7	0.244296	0.098061	2.49126	0.012729	0.0498027	14699.9	12409.6	16350.7	13860.7	13888.2	12871.9	11638.7	12718.2
BCAS3	3326.56	-0.2805	0.0803156	-3.49247	0.000478569	0.00360226	3004.31	3648.8	2928.48	2977.05	3107.4	3538.33	3747.86	3660.22
[truncated: 14,832 more rows]

## Sheet: p-adj
Gene_ID	baseMean	log2FoldChange	lfcSE	stat	pvalue	padj	MT	WT	MT1	MT2	MT3	WT1	WT2	WT3
[truncated: 3,924 more rows]

## Sheet: UP_total
Gene_ID	baseMean	log2FoldChange	lfcSE	stat	pvalue	padj	MT	WT	MT1	MT2	MT3	WT1	WT2	WT3
[truncated: 1,620 more rows]

[truncated: 1 more sheets: DW_total]
